# Supplementary material for: Zanthoxylum bungeanum root-rot associated shifts in microbiomes of root endosphere, rhizosphere, and soil
Source: PeerJ. 2022 Aug 4;10:e13808. doi: 10.7717/peerj.13808 (PMC9357373; doi:10.7717/peerj.13808)
Supplement: Supplemental Information 2 [file peerj-10-13808-s002.xlsx]

## Sheet: environmentx
	TC	TN	NH4	NO3	AP	AK	PH	EC	SIR	MBC	MBN	Invertase	Protease	Urease	Celluase
DR1	0.180851	2.31741	4.4296	30.1741	12.7776	0.126368	7.71	265	1.22655	45.9293	76.3353	379.76	1.15044	7.50234	1.14232
DR2	0.203957	2.92923	4.21162	16.352	8.86516	0.150862	7.88	257	1.91731	67.9267	59.6966	257.329	1.52963	9.82048	1.18506
DR3	0.162852	2.64254	5.49258	12.6602	9.93308	0.175783	7.94	307	2.1366	41.3386	51.9403	165.08	1.47535	4.66213	0.867271
DR4	0.0878289	2.24439	4.04451	11.4808	4.8286	0.151137	8.09	243	0.346639	19.6313	7.03245	202.415	1.54023	10.5997	1.00015
DR5	0.124263	2.43025	5.46335	8.42531	9.94174	0.218261	7.94	245	1.61286	31.3397	18.4861	73.9882	2.16262	8.9492	1.0501
DB1	0.175824	2.35108	4.09477	10.48	14.1321	0.190705	7.97	190.2	1.46787	63.2318	51.9229	395.602	1.15301	6.76591	1.11593
DB2	0.265622	3.38909	5.75107	20.2384	19.1928	0.272224	7.83	269	1.2492	399.706	280.17	653.769	1.08141	8.92195	1.20693
DB3	0.144908	2.46281	3.77888	11.2087	13.2673	0.275298	7.96	244	1.33298	71.6253	67.9995	302.375	1.99978	6.82876	1.61315
DB4	0.0963498	2.23066	2.41747	4.01258	8.43747	0.243759	8.12	212	0.305456	31.5143	26.2573	73.3315	2.1794	6.29662	1.70581
DB5	0.133543	2.60099	3.19948	6.81447	13.6965	0.334849	7.92	247	0.265418	52.9359	59.7492	268.249	2.30978	12.42	1.95031
HR1	0.277896	3.07462	4.32685	10.0345	19.5164	0.150745	7.82	197	2.36762	70.3237	65.1397	392.238	0.976305	9.20891	1.16973
HR2	0.279298	2.96831	4.28328	20.9857	14.9578	0.0929951	7.73	288	2.38782	73.523	66.6296	483.459	1.16377	7.83297	1.68328
HR3	0.233948	2.43084	3.76397	12.4777	45.0232	0.19417	7.75	235	1.00309	116.063	65.8923	458.782	1.10024	4.80106	1.27072
HR4	0.174297	2.08461	3.23376	5.24041	16.1779	0.0974887	7.77	179.7	2.08954	64.9393	44.3997	239.195	1.21376	6.2392	1.09094
HR5	0.179929	2.21574	3.20979	4.98341	26.2768	0.123511	7.76	188.7	1.48942	68.0544	50.8453	296.119	1.42021	7.10877	1.29414
HB1	0.275022	2.96917	5.07959	6.66218	21.1174	0.121142	7.72	190.6	3.27971	69.636	41.5114	415.465	0.996422	6.20576	1.20076
HB2	0.242695	2.70208	4.97875	6.68591	21.9891	0.123443	7.78	198.9	2.42854	76.3287	73.1567	537.462	0.955781	9.91365	1.52602
HB3	0.220684	2.49964	5.89792	8.3551	30.4247	0.1998	7.83	194.8	1.76966	46.902	46.25	429.251	0.853371	6.13257	1.31961
HB4	0.198608	2.34508	12.1852	8.82944	27.2104	0.180484	7.89	207	1.52059	60.5657	47.6873	435.655	1.0847	5.68753	1.67457
HB5	0.211402	2.58049	4.72142	12.1327	26.3611	0.206061	7.85	224	1.29347	68.0643	104.006	598.508	1.21308	5.99364	1.93319
