# Supplementary material for: Zanthoxylum bungeanum root-rot associated shifts in microbiomes of root endosphere, rhizosphere, and soil
Source: PeerJ. 2022 Aug 4;10:e13808. doi: 10.7717/peerj.13808 (PMC9357373; doi:10.7717/peerj.13808)
Supplement: Supplemental Information 3 [file peerj-10-13808-s003.xlsx]

## Sheet: environmentx
	TC	TN	NH4	NO3	AP	AK	PH	EC	SIR	MBC	MBN	Invertase	Protease	Urease	Celluase
DR1	0.180851	2.31741	4.4296	30.1741	12.7776	0.126368	7.71	265	1.22655	45.9293	76.3353	379.76	1.15044	7.50234	1.14232
DR2	0.203957	2.92923	4.21162	16.352	8.86516	0.150862	7.88	257	1.91731	67.9267	59.6966	257.329	1.52963	9.82048	1.18506
DR3	0.162852	2.64254	5.49258	12.6602	9.93308	0.175783	7.94	307	2.1366	41.3386	51.9403	165.08	1.47535	4.66213	0.867271
DR4	0.0878289	2.24439	4.04451	11.4808	4.8286	0.151137	8.09	243	0.346639	19.6313	7.03245	202.415	1.54023	10.5997	1.00015
DR5	0.124263	2.43025	5.46335	8.42531	9.94174	0.218261	7.94	245	1.61286	31.3397	18.4861	73.9882	2.16262	8.9492	1.0501
DB1	0.175824	2.35108	4.09477	10.48	14.1321	0.190705	7.97	190.2	1.46787	63.2318	51.9229	395.602	1.15301	6.76591	1.11593
DB2	0.265622	3.38909	5.75107	20.2384	19.1928	0.272224	7.83	269	1.2492	399.706	280.17	653.769	1.08141	8.92195	1.20693
DB3	0.144908	2.46281	3.77888	11.2087	13.2673	0.275298	7.96	244	1.33298	71.6253	67.9995	302.375	1.99978	6.82876	1.61315
DB4	0.0963498	2.23066	2.41747	4.01258	8.43747	0.243759	8.12	212	0.305456	31.5143	26.2573	73.3315	2.1794	6.29662	1.70581
DB5	0.133543	2.60099	3.19948	6.81447	13.6965	0.334849	7.92	247	0.265418	52.9359	59.7492	268.249	2.30978	12.42	1.95031
HR1	0.277896	3.07462	4.32685	10.0345	19.5164	0.150745	7.82	197	2.36762	70.3237	65.1397	392.238	0.976305	9.20891	1.16973
HR2	0.279298	2.96831	4.28328	20.9857	14.9578	0.0929951	7.73	288	2.38782	73.523	66.6296	483.459	1.16377	7.83297	1.68328
HR3	0.233948	2.43084	3.76397	12.4777	45.0232	0.19417	7.75	235	1.00309	116.063	65.8923	458.782	1.10024	4.80106	1.27072
HR4	0.174297	2.08461	3.23376	5.24041	16.1779	0.0974887	7.77	179.7	2.08954	64.9393	44.3997	239.195	1.21376	6.2392	1.09094
HR5	0.179929	2.21574	3.20979	4.98341	26.2768	0.123511	7.76	188.7	1.48942	68.0544	50.8453	296.119	1.42021	7.10877	1.29414
HB1	0.275022	2.96917	5.07959	6.66218	21.1174	0.121142	7.72	190.6	3.27971	69.636	41.5114	415.465	0.996422	6.20576	1.20076
HB2	0.242695	2.70208	4.97875	6.68591	21.9891	0.123443	7.78	198.9	2.42854	76.3287	73.1567	537.462	0.955781	9.91365	1.52602
HB3	0.220684	2.49964	5.89792	8.3551	30.4247	0.1998	7.83	194.8	1.76966	46.902	46.25	429.251	0.853371	6.13257	1.31961
HB4	0.198608	2.34508	12.1852	8.82944	27.2104	0.180484	7.89	207	1.52059	60.5657	47.6873	435.655	1.0847	5.68753	1.67457
HB5	0.211402	2.58049	4.72142	12.1327	26.3611	0.206061	7.85	224	1.29347	68.0643	104.006	598.508	1.21308	5.99364	1.93319

## Sheet: species_annotation_L6
Taxon	HE1	HE2	HE3	HE4	HE5	DE1	DE2	DE3	DE4	DE5	HR1	HR2	HR3	HR4	HR5	DR1	DR2	DR3	DR4	DR5	HR1	HB2	HB3	HB4	HB5	DB1	DB2	DB3	DB4	DB5
k__Bacteria;p__Proteobacteria;c__Gammaproteobacteria;o__Pseudomonadales;f__Pseudomonadaceae;g__Pseudomonas	0.0174424	0.0245938	0.0259611	0.0244678	0.0117817	0.863984	0.790494	0.295433	0.312996	0.0328787	0.0112234	0.00838744	0.010076	0.0106584	0.0114191	0.010255	0.0120761	0.0108903	0.0163367	0.0105054	0.0102664	0.0105778	0.0118127	0.0115537	0.0135512	0.00905805	0.00778892	0.0115476	0.0162322	0.0125122
k__Bacteria;p__Proteobacteria;c__Gammaproteobacteria;o__Enterobacterales;f__Enterobacteriaceae;g__Escherichia	0.151004	0.231142	0.238343	0.227863	0.0710243	0.0166614	0.00962398	0.0344939	0.0611455	0.0804031	0.000131993	0.000243134	0.0011177	0.000163133	0.000163453	0.000155187	0.000175301	0.000139146	0.000180978	0.000163901	0.000161955	0.000146755	0.000603636	0.000143911	0.000155982	0.000163659	0.000199823	0.000146098	0.000166877	0.000524862
k__Bacteria;p__Proteobacteria;c__Alphaproteobacteria;o__Rhizobiales;f__Bradyrhizobiaceae;g__Bradyrhizobium	0.0249815	0.00772022	0.0196535	0.0768116	0.0610166	0.00268507	0.01403	0.0369199	0.037193	0.0333899	0.0337007	0.0437009	0.0415046	0.0414169	0.0425084	0.0354769	0.0339854	0.047855	0.0369575	0.0459602	0.0388279	0.0387934	0.0390655	0.0388649	0.0397998	0.0429576	0.0331502	0.0306342	0.0306061	0.0330159
k__Bacteria;p__Actinobacteria;c__Actinobacteria;o__Streptomycetales;f__Streptomycetaceae;g__Streptomyces	0.0191424	0.0062977	0.00449842	0.00514554	0.144588	0.00187808	0.00296392	0.0281937	0.0111729	0.0353374	0.0232883	0.0307637	0.0219782	0.0229319	0.0255992	0.0261347	0.0214066	0.0234689	0.0202988	0.0276325	0.0214841	0.0234831	0.0205994	0.0196005	0.0188861	0.0250619	0.0202186	0.0188757	0.01838	0.0171604
k__Bacteria;p__Proteobacteria;c__Alphaproteobacteria;o__Sphingomonadales;f__Sphingomonadaceae;g__Sphingomonas	0.00705461	0.00156601	0.00122337	0.0026106	0.0169259	0.00117306	0.000517726	0.0146737	0.00755533	0.028663	0.0297969	0.0256961	0.0433205	0.0227719	0.0239046	0.029088	0.0199539	0.0640011	0.0239915	0.0273126	0.0273455	0.0267161	0.0247279	0.0321509	0.0269256	0.0252584	0.0360782	0.0305096	0.0341608	0.0259913
k__Bacteria;p__Proteobacteria;c__Alphaproteobacteria;o__Rhizobiales;f__Rhizobiaceae;g__Rhizobium	0.0777817	0.113167	0.11295	0.112133	0.0399162	0.0081326	0.00428061	0.0214194	0.0354381	0.0406204	0.00537954	0.00561887	0.00558036	0.00550267	0.005376	0.0053927	0.0053987	0.00532495	0.00549238	0.00551837	0.0051797	0.00509715	0.00543772	0.0052013	0.00516021	0.00527069	0.00530651	0.00807995	0.00500251	0.00526855
k__Bacteria;p__Proteobacteria;c__Alphaproteobacteria;o__Rhizobiales;f__Phyllobacteriaceae;g__Mesorhizobium	0.013753	0.00975922	0.00854771	0.00693588	0.0175605	0.00110647	0.000667371	0.0198701	0.00366754	0.0166321	0.0227688	0.0281074	0.0232266	0.0222212	0.0230714	0.0260952	0.0195878	0.0320584	0.0218731	0.028045	0.0207	0.020788	0.0199303	0.0201379	0.0200838	0.0222842	0.0225473	0.0198191	0.0196123	0.0179595
k__Bacteria;p__Actinobacteria;c__Thermoleophilia;o__Solirubrobacterales;f__Solirubrobacteraceae;g__Solirubrobacter	0.00240956	0.000444648	0.00160334	0.00033673	0.00469204	0.000201666	0.000212597	0.0054107	0.000122019	0.00581725	0.0253122	0.0294496	0.0249099	0.0274223	0.0267571	0.0309282	0.0233345	0.0296364	0.0210364	0.0368878	0.0239769	0.0284307	0.0253	0.0228561	0.022276	0.0303642	0.026814	0.0186043	0.0170828	0.0171342
k__Bacteria;p__Firmicutes;c__Bacilli;o__Lactobacillales;f__Lactobacillaceae;g__Lactobacillus	0.0663901	0.103532	0.105089	0.104064	0.0313168	0.00747636	0.00378366	0.0151003	0.0270366	0.0349737	0.000454995	0.000466178	0.000777649	0.000503699	0.000503151	0.00046915	0.000611368	0.000404304	0.000489985	0.000545349	0.000445043	0.000450973	0.000610008	0.000456967	0.00042055	0.000451042	0.000344406	0.000444868	0.000459244	0.000566178
k__Bacteria;p__Actinobacteria;c__Actinobacteria;o__Propionibacteriales;f__Nocardioidaceae;g__Nocardioides	0.000955003	0.00071303	0.000301273	0.000224739	0.00148436	0.000101732	9.34e-05	0.00122429	0.000189274	0.00212262	0.0283917	0.0291944	0.0328038	0.023415	0.0256717	0.0327496	0.0154737	0.0160096	0.0169341	0.0134399	0.028788	0.0298672	0.0295219	0.0235796	0.023077	0.0273438	0.0327746	0.0215873	0.0211313	0.0186438
k__Bacteria;p__Nitrospirae;c__Nitrospira;o__Nitrospirales;f__Nitrospiraceae;g__Nitrospira	0.000106756	5.49e-05	0.00018124	0.000145286	0.000246188	1.74e-05	3.72e-05	0.00024554	8.53e-05	0.00235127	0.0196298	0.016632	0.0143381	0.0232858	0.0209799	0.0163343	0.0313948	0.0239768	0.0286724	0.0198586	0.0225282	0.0212158	0.0198137	0.0192417	0.0246788	0.0219642	0.0147158	0.0284542	0.029729	0.031881
k__Bacteria;p__Proteobacteria;c__Gammaproteobacteria;o__Enterobacterales;f__Enterobacteriaceae;g__Enterobacter	0.0191981	0.0297967	0.0314293	0.0299743	0.00956169	0.00226826	0.0984165	0.00494937	0.120319	0.0111378	0.000116973	0.00011178	0.000243278	0.000125275	0.000113706	9.89e-05	0.00014929	0.000113877	0.000198365	0.000107289	0.000128728	9.82e-05	0.000169983	0.000100344	0.000135043	0.000100516	0.000104875	0.000118705	0.000124161	0.000179383
k__Bacteria;p__Proteobacteria;c__Betaproteobacteria;o__Burkholderiales;f__Comamonadaceae;g__Variovorax	0.0176264	0.000752004	0.000888714	0.00598169	0.0202624	0.0014218	0.000606694	0.0108724	0.039575	0.0146653	0.0115145	0.00850694	0.0138758	0.0121929	0.011875	0.0100269	0.010426	0.00518779	0.0105738	0.00905656	0.00993771	0.0103736	0.0117801	0.0106226	0.0119075	0.0105779	0.00946324	0.010375	0.013248	0.00989951
k__Bacteria;p__Proteobacteria;c__Gammaproteobacteria;o__Nevskiales;f__Sinobacteraceae;g__Steroidobacter	0.00454642	0.00164927	0.00125199	0.00146118	0.0157951	0.00102239	0.0023862	0.012178	0.0135119	0.0398434	0.00777537	0.0113605	0.00936443	0.00822557	0.0100047	0.0083871	0.00995194	0.0234333	0.0114141	0.0108743	0.00801818	0.00781231	0.00850326	0.0086463	0.00953013	0.00989528	0.0105264	0.0132359	0.00797345	0.00908626
k__Bacteria;p__Actinobacteria;c__Rubrobacteria;o__Gaiellales;f__Gaiellaceae;g__Gaiella	6.96e-05	6.47e-05	0.000132751	6.28e-05	0.000115191	1.23e-05	1.84e-05	0.000139113	2.79e-05	0.000256228	0.0127153	0.0134682	0.00920492	0.0156542	0.0148902	0.0144324	0.0147974	0.0170521	0.0110976	0.0233855	0.0129239	0.0123349	0.0110397	0.0115312	0.00942463	0.0144228	0.00896208	0.00707845	0.0103505	0.00851032
k__Bacteria;p__Acidobacteria;c__Acidobacteriia;o__Acidobacteriales;f__Acidobacteriaceae;g__Acidobacterium	6.32e-05	4.43e-05	0.000223371	8.93e-05	0.000372363	1.64e-05	3.19e-05	0.000606956	8.48e-05	0.00289868	0.0139306	0.0100643	0.00988452	0.0130988	0.0121822	0.0104313	0.0149535	0.00787329	0.0125195	0.00898617	0.0158138	0.0127736	0.0121757	0.0131525	0.0127833	0.013491	0.0109332	0.0134646	0.013021	0.0142263
k__Bacteria;p__Proteobacteria;c__Alphaproteobacteria;o__Rhizobiales;f__Hyphomicrobiaceae;g__Rhodoplanes	0.000817497	0.000182465	0.000663754	0.000354134	0.00158241	6.81e-05	0.000150176	0.00202334	0.000568061	0.00327838	0.0130312	0.0128909	0.00954243	0.0124856	0.0120781	0.00922618	0.00946669	0.0123471	0.00887585	0.00892213	0.0153616	0.0146017	0.0129605	0.0152284	0.0135251	0.0153919	0.0109914	0.011762	0.00983776	0.0108824
k__Bacteria;p__Actinobacteria;c__Actinobacteria;o__Corynebacteriales;f__Mycobacteriaceae;g__Mycobacterium	0.0142432	0.000992928	0.000822736	0.000879282	0.0221593	0.000713023	0.000254919	0.00571945	0.000501527	0.00565178	0.0103961	0.0127625	0.0117739	0.00960375	0.00980842	0.00994892	0.0085209	0.0110655	0.0088956	0.00951179	0.0102309	0.0113697	0.00975204	0.00890061	0.00914886	0.0101395	0.00977914	0.00804397	0.00722507	0.0077548
k__Bacteria;p__Proteobacteria;c__Gammaproteobacteria;o__Xanthomonadales;f__Xanthomonadaceae;g__Lysobacter	0.0087894	0.00152792	0.000449127	0.00034354	0.0144753	8.95e-05	0.000284954	0.00418905	0.00183245	0.00280985	0.0132922	0.011581	0.0148791	0.00982782	0.0104685	0.0103384	0.00832527	0.00673502	0.00981551	0.00682385	0.00923768	0.00972805	0.0105708	0.0104487	0.0124204	0.00930721	0.0168524	0.00935429	0.00872791	0.00766967
k__Bacteria;p__Actinobacteria;c__Actinobacteria;o__Pseudonocardiales;f__Pseudonocardiaceae;g__Amycolatopsis	0.00203185	0.00208683	0.00453181	0.00437447	0.0026194	0.0249927	0.00151419	0.0449362	0.000810658	0.0882619	0.00328532	0.00384035	0.00298501	0.0032474	0.0032552	0.00384442	0.0032446	0.00306769	0.00270065	0.00481018	0.00307923	0.00368672	0.00340499	0.00271894	0.00259228	0.0035382	0.00317619	0.00277714	0.00289557	0.0025477
k__Bacteria;p__Firmicutes;c__Bacilli;o__Lactobacillales;f__Enterococcaceae;g__Enterococcus	0.0317501	0.0461238	0.0485661	0.0469326	0.0155259	0.00343781	0.00190291	0.00715814	0.0126736	0.0175698	0.000133229	0.000147666	0.000297468	0.000150947	0.000154214	0.000138216	0.000179235	0.000122355	0.000163987	0.000168566	0.000133665	0.000126328	0.000216482	0.000141348	0.000132609	0.000133453	0.000128412	0.00014135	0.000140678	0.000237724
k__Bacteria;p__Proteobacteria;c__Alphaproteobacteria;o__Rhizobiales;f__Hyphomicrobiaceae;g__Hyphomicrobium	0.00274491	0.000522594	0.00117409	0.000741563	0.00617158	0.000308383	0.000595924	0.00712112	0.00229915	0.00984892	0.012772	0.0122911	0.00896509	0.0116224	0.0114296	0.00944109	0.00980177	0.00621501	0.00988288	0.00654715	0.0104012	0.0107539	0.00966696	0.0109546	0.00966014	0.0115227	0.00928999	0.0100389	0.0069401	0.0100548
k__Bacteria;p__Actinobacteria;c__Actinobacteria;o__Micromonosporales;f__Micromonosporaceae;g__Actinoplanes	0.00107046	0.00201863	0.000400637	0.000461585	0.0130158	0.000290733	0.00302209	0.0047139	0.012713	0.0124923	0.00738187	0.00829987	0.0119001	0.00843078	0.00574484	0.00605391	0.00474121	0.00443056	0.00708523	0.00397774	0.00614763	0.00881619	0.0208071	0.00602436	0.00628828	0.00705063	0.0108702	0.00720847	0.00358073	0.00773383
k__Bacteria;p__Acidobacteria;c__Acidobacteria subdivision 6;o__unclassified;f__Vicinamibacteraceae;g__Luteitalea	9.4e-05	7.88e-05	0.000426869	0.000230036	0.000536845	5.46e-05	0.000141832	0.000730423	0.000161171	0.00151236	0.0101293	0.00855811	0.00801403	0.0103361	0.00972687	0.00823452	0.0112494	0.00540025	0.0102205	0.00753374	0.0120279	0.0107958	0.0103681	0.0108688	0.0109849	0.0102161	0.00864665	0.00966913	0.00944307	0.0116605
k__Bacteria;p__Actinobacteria;c__Actinobacteria;o__Corynebacteriales;f__Mycobacteriaceae;g__Mycolicibacterium	0.0120095	0.000841465	0.000959462	0.000724159	0.0173816	0.00146935	0.000198565	0.00604818	0.000395601	0.00860434	0.00789782	0.0105631	0.00914844	0.00664736	0.00700964	0.00749139	0.00535083	0.00950381	0.0068185	0.00631943	0.00699538	0.00817503	0.00683736	0.0062148	0.00646195	0.00745935	0.00813413	0.00557053	0.00455181	0.00469428
k__Bacteria;p__Actinobacteria;c__Actinobacteria;o__Micrococcales;f__Micrococcaceae;g__Arthrobacter	0.00104319	0.00121614	0.00114468	0.000873985	0.000845987	8.38e-05	0.000105123	0.00067171	0.000840923	0.00344674	0.00823531	0.00990565	0.0103401	0.00817975	0.00981268	0.0130655	0.00846122	0.00607753	0.00918209	0.00798516	0.00792343	0.00927252	0.00810199	0.00764326	0.00686481	0.0090944	0.0078645	0.00586547	0.0100903	0.00670819
k__Bacteria;p__Actinobacteria;c__Actinobacteria;o__Pseudonocardiales;f__Pseudonocardiaceae;g__Pseudonocardia	0.0025842	0.000973442	0.00248093	0.0034687	0.00647509	0.00264471	0.00107436	0.0105097	0.0018202	0.0303732	0.0051903	0.00774989	0.00544635	0.00514098	0.00506882	0.00624581	0.00444154	0.00733982	0.00474416	0.00869059	0.0057117	0.00587098	0.00601725	0.00495606	0.00479615	0.00624496	0.00618169	0.00496733	0.00453225	0.00403301
k__Bacteria;p__Firmicutes;c__Bacilli;o__Bacillales;f__Bacillaceae;g__Bacillus	0.0163702	0.0233068	0.0238125	0.0218791	0.00791659	0.00172993	0.000937839	0.00373747	0.00613194	0.00898018	0.00276654	0.00277217	0.00231306	0.00290374	0.00304591	0.00271046	0.00336984	0.00326735	0.00349865	0.00424787	0.00298202	0.00298348	0.00260485	0.00277591	0.00257589	0.00256444	0.00225521	0.00261588	0.00321774	0.00341181
k__Bacteria;p__Actinobacteria;c__Actinobacteria;o__Micromonosporales;f__Micromonosporaceae;g__Micromonospora	0.000815176	0.000355187	0.000435613	0.000569793	0.00302712	0.000238192	0.000410176	0.00260737	0.000733075	0.00348586	0.00806445	0.00973343	0.0069495	0.0083458	0.00798788	0.00798926	0.00777969	0.0143437	0.00700007	0.00764803	0.00819304	0.00874995	0.00780766	0.00677861	0.00615502	0.00850359	0.00779292	0.00675155	0.00499586	0.00641918
k__Bacteria;p__Actinobacteria;c__Thermoleophilia;o__Solirubrobacterales;f__Conexibacteraceae;g__Conexibacter	0.00339241	0.000459705	0.000945153	0.000294355	0.00575475	0.000237947	0.00010042	0.00433467	0.000116735	0.0075573	0.00680619	0.00790409	0.0064711	0.00779417	0.00736391	0.00833798	0.0066033	0.00924131	0.00596024	0.0114284	0.00707208	0.00744899	0.00650222	0.00649276	0.00586075	0.00875121	0.0068332	0.00538371	0.0054496	0.00494114
k__Bacteria;p__Proteobacteria;c__Gammaproteobacteria;o__Enterobacterales;f__Enterobacteriaceae;g__Klebsiella	0.0230953	0.0326665	0.0338133	0.0301423	0.0105446	0.0022198	0.00291143	0.00481382	0.00971421	0.01217	0.000111142	0.000120365	0.000219308	0.000116663	0.000121701	0.000110638	0.000150601	0.000117534	0.000129214	0.000111741	0.000133665	0.000113437	0.000173255	0.000116509	0.00012076	0.000112974	0.000132575	0.000122905	0.000119225	0.000264715
k__Bacteria;p__Proteobacteria;c__Alphaproteobacteria;o__Rhizobiales;f__Hyphomicrobiaceae;g__Devosia	0.00236952	0.00228701	0.00037361	0.000694648	0.00794017	0.000644712	0.000186885	0.00526834	0.00169674	0.0084674	0.00679771	0.0065835	0.0088344	0.00745263	0.00539466	0.00762193	0.00397925	0.00715146	0.00446776	0.00639576	0.00437429	0.0062698	0.00689385	0.00556325	0.00583397	0.00534237	0.0105504	0.00666207	0.00602864	0.00562919
k__Bacteria;p__Proteobacteria;c__Alphaproteobacteria;o__Caulobacterales;f__Caulobacteraceae;g__Phenylobacterium	0.00174639	0.00044199	0.001	0.000317813	0.00348708	0.000168981	9.99e-05	0.00188717	0.00374848	0.00444952	0.0078851	0.00481804	0.0082044	0.00618737	0.00608329	0.00524028	0.00432307	0.00752933	0.00526991	0.00553469	0.00688108	0.00650441	0.00826009	0.00800146	0.00996918	0.00619855	0.00762769	0.00721213	0.00869468	0.00702314
k__Bacteria;p__Proteobacteria;c__Gammaproteobacteria;o__Pseudomonadales;f__Moraxellaceae;g__Acinetobacter	0.0209085	0.0286355	0.0292759	0.0241061	0.00935595	0.00206005	0.00121263	0.00453791	0.0103243	0.0105849	0.000390147	0.000355944	0.000470491	0.000411733	0.000435638	0.000361449	0.00049399	0.00040846	0.0004888	0.000409435	0.000410488	0.00037244	0.000437442	0.000430945	0.000428827	0.000385169	0.00036458	0.000467696	0.00050177	0.000568255
k__Bacteria;p__Actinobacteria;c__Actinobacteria;o__Micrococcales;f__Micrococcaceae;g__Paenarthrobacter	0.0248858	0.0360138	0.0307187	0.026663	0.00660743	0.000383313	0.000449161	0.00215533	0.00809217	0.0106821	3.87e-05	7.02e-05	0.000137067	3.05e-05	4.51e-05	5.96e-05	4.35e-05	2.21e-05	5.39e-05	2.23e-05	3.74e-05	5e-05	0.000123311	2.33e-05	2.69e-05	3.43e-05	0.000199342	2.78e-05	2.77e-05	0.000408803
k__Bacteria;p__Gemmatimonadetes;c__Gemmatimonadetes;o__Gemmatimonadales;f__Gemmatimonadaceae;g__Gemmatimonas	5.28e-05	2.21e-05	0.000145469	5.45e-05	0.000178413	6.95e-06	1.52e-05	0.000140972	3.36e-05	0.00103999	0.00628811	0.00502597	0.00502928	0.00629153	0.00716066	0.00742285	0.0101036	0.00825349	0.00939744	0.0110883	0.00611725	0.00550766	0.00532457	0.00633722	0.0062378	0.00620776	0.00513166	0.00790262	0.0102047	0.00954614
k__Bacteria;p__Proteobacteria;c__Betaproteobacteria;o__Burkholderiales;f__Comamonadaceae;g__Polaromonas	0.0293208	0.00180959	0.00102305	0.000985976	0.00523237	0.000144386	0.00196654	0.00792435	0.00903085	0.00847382	0.00354012	0.0021075	0.00324346	0.00284038	0.00364873	0.00256278	0.00435017	0.00245608	0.00567948	0.00353141	0.00269019	0.00256246	0.00324568	0.00308207	0.00360446	0.00435803	0.00300583	0.00430332	0.00891908	0.00502481
k__Bacteria;p__Proteobacteria;c__Alphaproteobacteria;o__Rhizobiales;f__Methylobacteriaceae;g__Microvirga	0.000492007	0.000100976	0.000233705	0.000208092	0.000788391	3.88e-05	0.000142515	0.000915545	0.00086254	0.00111535	0.00755379	0.00853098	0.00706298	0.00680124	0.00640451	0.0061621	0.00480242	0.004124	0.0046274	0.00419592	0.00869694	0.00869343	0.00802053	0.00817987	0.00813522	0.0073462	0.00815414	0.0058777	0.00470274	0.00564974
k__Bacteria;p__Actinobacteria;c__Actinobacteria;o__Micrococcales;f__Microbacteriaceae;g__Microbacterium	0.00269385	0.00214263	0.0019078	0.00153912	0.00148838	0.000205997	9.77e-05	0.00139857	0.000832996	0.00610876	0.00792768	0.00696297	0.00862822	0.00676045	0.00617479	0.00673504	0.00282908	0.00297792	0.00340046	0.00266737	0.00519508	0.00721994	0.00666308	0.00560524	0.00579209	0.00408959	0.00796905	0.00436997	0.00510009	0.00481594
k__Bacteria;p__Actinobacteria;c__Actinobacteria;o__Corynebacteriales;f__Nocardiaceae;g__Nocardia	0.012288	0.00209835	0.000816377	0.0010904	0.0111111	0.000496648	0.000548292	0.0129366	0.00128937	0.00564248	0.00394794	0.00545729	0.00414287	0.00418915	0.00441003	0.00455949	0.0037775	0.00340417	0.00622637	0.00429324	0.00366021	0.0040072	0.00354328	0.00357353	0.00366971	0.00431536	0.00340291	0.00402354	0.00353289	0.00302522
k__Bacteria;p__Bacteroidetes;c__Chitinophagia;o__Chitinophagales;f__Chitinophagaceae;g__Niastella	0.0163395	0.00214175	0.000894279	0.00112521	0.0106043	3.67e-05	0.00177162	0.00557987	0.0203296	0.00145752	0.00272237	0.00205256	0.00499651	0.00256464	0.00310134	0.00286255	0.00321662	0.00145147	0.00510395	0.00304967	0.00257286	0.00229889	0.00260571	0.00278853	0.00355106	0.00298937	0.00284907	0.005015	0.00366522	0.00441752
k__Bacteria;p__Planctomycetes;c__Planctomycetia;o__Planctomycetales;f__Gemmataceae;g__Gemmata	0.000185663	6.02e-05	0.000304452	0.00016269	0.000597388	1.55e-05	5.71e-05	0.000767602	0.000104245	0.000946666	0.00570112	0.00550743	0.0049816	0.00577856	0.00584007	0.00645893	0.00594646	0.00578195	0.00547677	0.00574546	0.00683513	0.00709817	0.00607339	0.00658936	0.00614593	0.00698066	0.00601469	0.00574914	0.00580044	0.00517803
k__Bacteria;p__Firmicutes;c__Bacilli;o__Bacillales;f__Staphylococcaceae;g__Staphylococcus	0.0203266	0.028864	0.0250788	0.0220524	0.00540274	0.000318025	0.000398572	0.001773	0.00665604	0.00878136	0.000128282	0.000122426	0.000196102	0.000130474	0.000122945	0.000134952	0.000146011	0.000135322	0.000162604	0.000153088	0.000137842	0.0001178	0.000183416	0.000127943	0.000128389	0.000128162	0.000239051	0.000127288	0.000139918	0.000418353
k__Bacteria;p__Proteobacteria;c__Alphaproteobacteria;o__Sphingomonadales;f__Sphingomonadaceae;g__Sphingosinicella	0.000275013	0.00010629	0.000100159	7.64e-05	0.000793749	8.64e-05	2.87e-05	0.000735535	0.000191916	0.0029609	0.00601246	0.00660377	0.0112348	0.00438104	0.0043848	0.00659911	0.00360001	0.00434777	0.00387997	0.00377652	0.00635306	0.006175	0.00545649	0.00771482	0.00636943	0.00516625	0.0072836	0.00494834	0.00561325	0.00506384
k__Bacteria;p__Candidatus Tectomicrobia;c__unclassified;o__unclassified;f__unclassified;g__Candidatus Entotheonella	4e-05	2.39e-05	6.92e-05	4.77e-05	7.02e-05	6.05e-06	1.29e-05	8.5e-05	2.35e-05	0.000171888	0.00598631	0.00607509	0.00426808	0.00747473	0.00660705	0.00539971	0.00878253	0.00218959	0.00760564	0.00540493	0.00657615	0.00595824	0.00545856	0.00578779	0.00537479	0.00593301	0.00449185	0.0060112	0.00431545	0.00659171
k__Bacteria;p__Proteobacteria;c__Alphaproteobacteria;o__Rhizobiales;f__Bradyrhizobiaceae;g__Bosea	0.00518057	0.000612055	0.00028299	0.00032992	0.00759432	0.000517649	0.00110986	0.0108662	0.00425674	0.00314786	0.00396031	0.00399866	0.00386415	0.00428144	0.00382498	0.00372791	0.00314077	0.00319054	0.00317562	0.00320657	0.00410203	0.00444389	0.00421753	0.00438141	0.00424056	0.00406689	0.0041745	0.0067532	0.00381216	0.00351811
k__Bacteria;p__Proteobacteria;c__Alphaproteobacteria;o__Sphingomonadales;f__Erythrobacteraceae;g__Altererythrobacter	0.000651561	0.000736946	0.000240859	0.00015815	0.00215783	0.000192515	8.32e-05	0.00233999	0.000630272	0.0050739	0.00564529	0.00529417	0.0069013	0.0034401	0.00366135	0.00474421	0.00335979	0.00790222	0.00474555	0.00363679	0.00514192	0.00529269	0.00464292	0.00581559	0.00529688	0.00363923	0.00612021	0.00443553	0.00591245	0.00423232
k__Bacteria;p__Proteobacteria;c__Alphaproteobacteria;o__Sphingomonadales;f__Sphingomonadaceae;g__Sphingopyxis	0.0049485	0.00214706	0.000259142	0.00032311	0.0071199	0.00118924	0.000252947	0.0109765	0.00483897	0.00492222	0.00391401	0.003675	0.00818183	0.00314357	0.00265842	0.00306897	0.0025917	0.00420264	0.00325089	0.00270851	0.00466763	0.00320461	0.00325309	0.00509899	0.00358482	0.00251239	0.00565732	0.00399377	0.00312813	0.00262929
k__Bacteria;p__Actinobacteria;c__Actinobacteria;o__Geodermatophilales;f__Geodermatophilaceae;g__Blastococcus	0.000142148	4.69e-05	8.98e-05	7.64e-05	0.000288782	4.42e-05	3.59e-05	0.000297591	3.7e-05	0.00059327	0.00646958	0.00661767	0.00639651	0.00479668	0.00518377	0.00581713	0.0037058	0.00524066	0.00320683	0.0021428	0.00755908	0.00688438	0.00672507	0.00571288	0.00640076	0.00569511	0.00900483	0.00410462	0.00291418	0.00452922
k__Eukaryota;p__Mucoromycota;c__Glomeromycetes;o__Glomerales;f__Glomeraceae;g__Rhizophagus	0.018376	0.0208258	0.0214023	0.019712	0.00813599	0.00147556	0.000774466	0.00287645	0.00551199	0.00754768	5.95e-05	8.91e-05	0.000228743	0.000112926	0.00018424	0.000496401	6.05e-05	6.25e-05	5.3e-05	8.52e-05	0.000489471	0.000109669	0.000246966	8.32e-05	4.4e-05	4.32e-05	0.000113841	9.28e-05	2.79e-05	0.000545832
k__Bacteria;p__Bacteroidetes;c__Cytophagia;o__Cytophagales;f__unclassified;g__Chryseolinea	0.000867974	0.000563338	0.000235295	0.000133179	0.00128907	3.7e-05	0.000218968	0.000551031	0.000302646	0.00227912	0.00504699	0.00485324	0.00714713	0.00411424	0.0038296	0.00450204	0.00606734	0.00591943	0.00674105	0.00510172	0.00473731	0.0043019	0.00514374	0.00421364	0.00534914	0.00403975	0.00462506	0.00569727	0.00586746	0.00580587
k__Bacteria;p__Actinobacteria;c__Actinobacteria;o__Corynebacteriales;f__Nocardiaceae;g__Rhodococcus	0.00211134	0.000225867	0.000245629	0.000227766	0.00731063	0.000201503	0.000143198	0.00214541	0.000238514	0.00279478	0.00446778	0.00610084	0.0050836	0.00513351	0.0051374	0.00559961	0.00456941	0.00371438	0.00566763	0.00404156	0.00449429	0.00488852	0.00498064	0.00471615	0.00456096	0.00504304	0.00461786	0.00391451	0.00321528	0.0038148
k__Bacteria;p__Proteobacteria;c__Alphaproteobacteria;o__Rhizobiales;f__Bradyrhizobiaceae;g__Afipia	0.00297061	0.000311785	0.000641496	0.00140897	0.00546543	0.00018516	0.000422843	0.00445581	0.00113324	0.00380911	0.00435258	0.00474832	0.00482553	0.00474939	0.00466658	0.00412101	0.00331848	0.00461226	0.0033234	0.00445629	0.00442024	0.00487146	0.00465394	0.00488372	0.00468659	0.0053154	0.00470624	0.00383872	0.00384709	0.00368421
k__Bacteria;p__Proteobacteria;c__Deltaproteobacteria;o__Myxococcales;f__Polyangiaceae;g__Sorangium	0.000170578	4.87e-05	0.00014229	9e-05	0.000497734	3.14e-05	8.57e-05	0.000834525	0.000128264	0.00228457	0.00451213	0.0035821	0.00364752	0.00487629	0.00466925	0.00405786	0.00632526	0.00334116	0.00574982	0.00512759	0.0049904	0.00530558	0.00588257	0.00530539	0.00600229	0.00516455	0.00385523	0.00578822	0.00664375	0.00700072
k__Bacteria;p__Proteobacteria;c__Deltaproteobacteria;o__Myxococcales;f__Myxococcaceae;g__Corallococcus	0.00714686	0.0113208	0.0115358	0.0110183	0.00351173	0.000811977	0.000454622	0.00187338	0.00286264	0.00429463	0.00218309	0.00207454	0.00194419	0.00249055	0.00246707	0.00226465	0.00302492	0.00184231	0.0028919	0.00280965	0.00262963	0.00239309	0.0025518	0.00271558	0.0027765	0.00255027	0.00224865	0.00261552	0.00296999	0.00315353
k__Bacteria;p__Proteobacteria;c__Gammaproteobacteria;o__Xanthomonadales;f__Xanthomonadaceae;g__Pseudoxanthomonas	0.0028244	0.00304079	0.000155008	0.000345054	0.00343672	0.000211717	0.000151692	0.00289814	0.000887761	0.00362504	0.00511467	0.00426635	0.00804438	0.00382941	0.00361338	0.00362641	0.00305203	0.00218461	0.00315507	0.00273819	0.00270747	0.0030753	0.00309224	0.00305959	0.0034871	0.00272946	0.0116517	0.00684962	0.00361263	0.00303457
k__Bacteria;p__Proteobacteria;c__Alphaproteobacteria;o__Sphingomonadales;f__Sphingomonadaceae;g__Novosphingobium	0.00174407	0.000464134	0.000309222	0.000286788	0.00415653	0.000226589	0.000133034	0.00351486	0.00131074	0.00516818	0.00378308	0.00370195	0.00500059	0.00328607	0.00338756	0.00371159	0.00337968	0.00507874	0.00398251	0.00330178	0.00379748	0.00356634	0.00357428	0.00447702	0.00396089	0.00354656	0.00434951	0.00596445	0.00627411	0.00380899
k__Bacteria;p__Proteobacteria;c__Betaproteobacteria;o__Burkholderiales;f__Alcaligenaceae;g__Achromobacter	0.00412578	4.07e-05	6.36e-05	5.52e-05	0.00128854	0.000221523	0.0038043	0.0639553	0.00155094	0.00182086	0.00102272	0.000974081	0.00102768	0.00102283	0.00104077	0.000966041	0.00113946	0.000992972	0.00111748	0.0010008	0.00106533	0.00102034	0.00105641	0.00112054	0.00113845	0.000966422	0.000890876	0.00147632	0.00125015	0.00119091
k__Bacteria;p__Verrucomicrobia;c__Verrucomicrobiae;o__Verrucomicrobiales;f__Verrucomicrobia subdivision 3;g__Pedosphaera	5.11e-05	1.77e-05	9.62e-05	3.93e-05	0.000118138	8.82e-06	1.59e-05	0.000124087	3.07e-05	0.000404065	0.00361345	0.0030378	0.0033957	0.00485647	0.00451308	0.00557089	0.00787696	0.00315929	0.00641051	0.00509303	0.00483035	0.00440403	0.00435393	0.00497184	0.00516752	0.0045478	0.00240796	0.00655048	0.00612091	0.00636312
k__Bacteria;p__Gemmatimonadetes;c__Gemmatimonadetes;o__Gemmatimonadales;f__Gemmatimonadaceae;g__Gemmatirosa	2.03e-05	1.33e-05	6.36e-05	3.41e-05	7.9e-05	7.11e-06	1.25e-05	9.19e-05	2.26e-05	0.000304331	0.00379315	0.00325621	0.00354666	0.00413228	0.00468435	0.00530441	0.00654559	0.00496752	0.00638443	0.00764866	0.00369306	0.00352608	0.00326497	0.00405731	0.0040177	0.00421638	0.00379407	0.00517972	0.00661451	0.0067875
k__Bacteria;p__Proteobacteria;c__Alphaproteobacteria;o__Rhizobiales;f__unclassified;g__Methyloceanibacter	0.000134025	4.25e-05	0.000100954	7.11e-05	0.000188324	8.99e-06	4.72e-05	0.000243681	0.000174382	0.000342814	0.00558327	0.00659295	0.00374544	0.00597013	0.00521291	0.00396893	0.00525531	0.00239407	0.00523079	0.00463907	0.00602137	0.00515168	0.00440646	0.00462842	0.00419965	0.00422389	0.00355966	0.00414096	0.00331039	0.00471504
k__Bacteria;p__Planctomycetes;c__Planctomycetia;o__Planctomycetales;f__Planctomycetaceae;g__Pirellula	4.47e-05	4.87e-05	0.000133546	7.26e-05	0.000274584	3.16e-05	2.52e-05	0.000269397	4.64e-05	0.000833143	0.00446955	0.00426394	0.00396883	0.00463501	0.00448412	0.0050988	0.00542165	0.00515854	0.00508024	0.00572489	0.00430025	0.00414602	0.00395145	0.00427633	0.00419868	0.00476658	0.00413879	0.00449854	0.00514034	0.00452901
k__Bacteria;p__Proteobacteria;c__Alphaproteobacteria;o__Sphingomonadales;f__Sphingomonadaceae;g__Sphingobium	0.00412636	0.000862723	0.000800479	0.000342027	0.00892546	0.000198153	0.000131138	0.00750701	0.00258354	0.00623703	0.00290119	0.00295384	0.00399153	0.00259616	0.00276058	0.00305413	0.00334252	0.0033277	0.00478664	0.00265041	0.00282253	0.00274114	0.00265256	0.00306117	0.00302435	0.0026513	0.00302728	0.00311444	0.00357921	0.002823
k__Bacteria;p__Actinobacteria;c__Actinobacteria;o__Micrococcales;f__Microbacteriaceae;g__Agromyces	0.000193205	0.000103633	4.37e-05	4.62e-05	0.000305123	1.81e-05	2.16e-05	0.000267228	5.38e-05	0.000821278	0.00468158	0.00623254	0.00425967	0.00376767	0.00445285	0.00366851	0.00399367	0.00694582	0.00749796	0.00495945	0.00339041	0.00413333	0.00367848	0.0037758	0.00415047	0.00294142	0.00640121	0.0040292	0.00346455	0.00446424
k__Bacteria;p__Proteobacteria;c__Betaproteobacteria;o__Burkholderiales;f__Burkholderiaceae;g__Paraburkholderia	0.00361462	0.0057317	0.0057997	0.00537255	0.00213077	0.000437407	0.000267737	0.00142831	0.00177792	0.00281306	0.00278262	0.00262313	0.0024579	0.00314406	0.00308144	0.00275469	0.00369553	0.00296595	0.00348206	0.00318685	0.00315346	0.00287441	0.00281358	0.00302588	0.00315242	0.00292213	0.00229764	0.00315608	0.0033831	0.00369417
k__Bacteria;p__Actinobacteria;c__Actinobacteria;o__Streptosporangiales;f__Streptosporangiaceae;g__Nonomuraea	0.00146848	0.000211695	0.000201113	0.000540282	0.0253426	0.00029057	0.000222305	0.00640169	0.000192156	0.00156206	0.00273739	0.00334927	0.00278482	0.00328915	0.00280464	0.00290204	0.0026446	0.00342445	0.00223437	0.00404877	0.00241793	0.00242225	0.00234893	0.00229923	0.00198248	0.00267656	0.00244911	0.00217229	0.00191139	0.00204754
k__Bacteria;p__Proteobacteria;c__Alphaproteobacteria;o__Rhizobiales;f__Xanthobacteraceae;g__Pseudolabrys	0.000456615	0.000116034	0.000205088	0.00017858	0.000872508	3.24e-05	6.8e-05	0.000974413	0.000336753	0.00190776	0.00519931	0.00462865	0.00404265	0.00445546	0.00411422	0.00340921	0.00326055	0.00321083	0.00299978	0.00272992	0.00499211	0.00501306	0.00435462	0.00492728	0.00453645	0.00476999	0.00399149	0.00414918	0.00324071	0.00398152
k__Bacteria;p__Proteobacteria;c__Alphaproteobacteria;o__Rhizobiales;f__Methylobacteriaceae;g__Methylobacterium	0.000668386	0.00016475	0.000259142	0.000224739	0.00108842	5.91e-05	0.00017164	0.00123281	0.000682874	0.00147195	0.00421316	0.00438843	0.00375921	0.00415194	0.00407318	0.00379122	0.00375476	0.00316594	0.00357847	0.00337281	0.00459188	0.00442822	0.00432655	0.00457716	0.0044066	0.00428925	0.00404513	0.00392291	0.00336753	0.0040627
k__Bacteria;p__Proteobacteria;c__Alphaproteobacteria;o__Rhizobiales;f__unclassified;g__Pseudorhodoplanes	0.00135882	0.000146149	0.000264707	0.000172527	0.00340779	9.98e-05	6.43e-05	0.00323926	0.000220499	0.00267998	0.00436353	0.00401583	0.00339927	0.0038325	0.00367307	0.003021	0.00268831	0.00269132	0.00300096	0.0029146	0.00437391	0.00443616	0.00392527	0.00445513	0.00421361	0.00435018	0.00348441	0.00401824	0.00332691	0.00370705
k__Bacteria;p__Actinobacteria;c__Acidimicrobiia;o__Acidimicrobiales;f__Ilumatobacteraceae;g__Ilumatobacter	8.47e-05	5.76e-05	9.22e-05	3.93e-05	0.000346378	1.15e-05	2.68e-05	0.000183729	1.71e-05	0.000380334	0.00454323	0.00535856	0.00374735	0.00412172	0.00483679	0.00430737	0.00473531	0.00219458	0.00464261	0.00415372	0.00400501	0.00459878	0.00401414	0.00404765	0.003696	0.00451452	0.00412118	0.00353009	0.00324432	0.00399211
k__Bacteria;p__Proteobacteria;c__Betaproteobacteria;o__Burkholderiales;f__Burkholderiaceae;g__Burkholderia	0.00260334	0.00361475	0.00386249	0.00347173	0.00192423	0.000644221	0.000333799	0.00129958	0.00144069	0.00248949	0.00289271	0.00263344	0.00252599	0.0030854	0.00312462	0.00285015	0.00369072	0.00299089	0.0035111	0.00325386	0.00314644	0.00291348	0.00292243	0.00323071	0.00328113	0.00293049	0.00239675	0.00328483	0.00346189	0.00365265
k__Bacteria;p__Planctomycetes;c__Planctomycetia;o__Planctomycetales;f__Planctomycetaceae;g__Blastopirellula	7.31e-05	5.14e-05	0.000118442	7.42e-05	0.00033218	2.03e-05	2.49e-05	0.000275903	7.59e-05	0.000852705	0.00436141	0.00427133	0.003602	0.00410515	0.00400158	0.00407597	0.00440154	0.00450005	0.00417159	0.00467151	0.00401241	0.00390011	0.00356843	0.00388008	0.00380004	0.00411058	0.00368759	0.00374851	0.00426799	0.00410526
k__Bacteria;p__Actinobacteria;c__Actinobacteria;o__Geodermatophilales;f__Geodermatophilaceae;g__Geodermatophilus	0.000184502	5.85e-05	0.000124802	0.000105181	0.000391918	6.54e-05	5e-05	0.00050874	8.48e-05	0.000751368	0.00446266	0.00468977	0.00439023	0.00379383	0.00389373	0.00419037	0.00310121	0.00359851	0.00271922	0.00281771	0.00516622	0.0048554	0.00460141	0.00415726	0.00436067	0.0043111	0.00565908	0.00303902	0.00234653	0.0031635
k__Bacteria;p__Actinobacteria;c__Actinobacteria;o__Propionibacteriales;f__Nocardioidaceae;g__Kribbella	0.0217887	0.000653685	0.000453896	0.000571306	0.010454	0.000425068	4.39e-05	0.00181575	0.000637718	0.00118558	0.00175813	0.00423475	0.00257878	0.00196004	0.00264474	0.00324929	0.00170164	0.00371421	0.00156459	0.0035242	0.00148284	0.00156155	0.00134005	0.00149135	0.00109966	0.00234378	0.00170938	0.00147742	0.00180717	0.00106073
k__Bacteria;p__Planctomycetes;c__Planctomycetia;o__Planctomycetales;f__Isosphaeraceae;g__Singulisphaera	0.00288706	2.66e-05	8.11e-05	4.09e-05	0.00300783	9.81e-06	2.05e-05	0.00133846	2.91e-05	0.000411441	0.00332561	0.00356253	0.00373919	0.00351046	0.00333	0.00383088	0.00325094	0.00408593	0.00309935	0.00344257	0.00383128	0.00418806	0.003333	0.00398733	0.00362247	0.00410836	0.00340755	0.0031853	0.00302637	0.00309478
k__Bacteria;p__Bacteroidetes;c__Chitinophagia;o__Chitinophagales;f__Chitinophagaceae;g__Chitinophaga	0.00540917	0.000520822	0.000209063	0.000279221	0.00683969	0.000436835	0.000208653	0.00328868	0.00173349	0.00174165	0.00262837	0.00195761	0.00324384	0.0024626	0.00288903	0.00280821	0.00321749	0.00177947	0.00322145	0.00245364	0.00260437	0.00252735	0.00291089	0.00274831	0.00336781	0.00253372	0.00284235	0.00392492	0.00322135	0.00391259
k__Bacteria;p__Planctomycetes;c__Planctomycetia;o__Planctomycetales;f__Gemmataceae;g__Fimbriiglobus	6.44e-05	4.43e-05	0.000103339	5.3e-05	0.000200647	7.93e-06	2.19e-05	0.000191939	3.34e-05	0.000576274	0.00344965	0.00349127	0.00299087	0.00367863	0.00360378	0.00393972	0.00371608	0.00397904	0.00341626	0.00355897	0.00419126	0.00424101	0.00355517	0.00393252	0.00383348	0.00428703	0.00350682	0.00351092	0.00327963	0.00351313
k__Bacteria;p__Actinobacteria;c__Actinobacteria;o__Streptosporangiales;f__Thermomonosporaceae;g__Actinomadura	0.00112848	0.000170064	0.000193959	0.000172527	0.0113228	0.000686467	0.000105654	0.00104691	0.000133068	0.00127441	0.00303124	0.00330377	0.00279222	0.00320239	0.00297555	0.00313311	0.00301684	0.00284908	0.00271942	0.00383186	0.00288424	0.00305706	0.00268132	0.00261997	0.00245724	0.00311548	0.00258681	0.00252202	0.00255973	0.00247005
k__Bacteria;p__Actinobacteria;c__Actinobacteria;o__Frankiales;f__Frankiaceae;g__Frankia	0.000430506	0.000162978	0.00018442	0.000204308	0.00112861	9.7e-05	0.000135234	0.000931192	0.00016045	0.00103742	0.00364897	0.00394921	0.00315344	0.0035735	0.00358317	0.00352948	0.00382209	0.00303577	0.00355081	0.00425677	0.00367559	0.00356138	0.00321158	0.00326501	0.00312693	0.00372967	0.00315345	0.00321616	0.00312073	0.00306737
k__Bacteria;p__Proteobacteria;c__Alphaproteobacteria;o__Rhodospirillales;f__Rhodospirillaceae;g__Inquilinus	0.0115935	0.000143492	0.000636726	5.9e-05	0.0288803	2.24e-05	4.71e-05	0.0059371	0.00013499	0.00057018	0.00119606	0.00138703	0.00106759	0.00129678	0.00133747	0.00124574	0.00130733	0.00196816	0.00115759	0.00179613	0.00114811	0.00109273	0.00107259	0.00111975	0.00114138	0.00125892	0.000974776	0.00120787	0.00131812	0.00120606
k__Bacteria;p__Proteobacteria;c__Betaproteobacteria;o__Nitrosomonadales;f__Nitrosomonadaceae;g__Nitrosospira	0.000420642	0.000613826	0.000594596	0.000630329	0.000267619	7.52e-05	3.49e-05	0.000202009	0.000176303	0.000820957	0.00336979	0.00421312	0.00502852	0.00306428	0.00299972	0.00475775	0.00322602	0.0021866	0.00451478	0.00191148	0.00270595	0.00282146	0.00291226	0.00312484	0.0033928	0.00368411	0.00460297	0.00292013	0.00285058	0.00471192
k__Bacteria;p__Acidobacteria;c__Solibacteres;o__Solibacterales;f__Solibacteraceae;g__Candidatus Sulfopaludibacter	2.73e-05	1.95e-05	9.06e-05	3.56e-05	0.000112245	6.46e-06	1.67e-05	0.000145465	2.59e-05	0.000402141	0.00327737	0.00267258	0.00257712	0.00388921	0.00356683	0.00292048	0.00489335	0.00258991	0.00407419	0.00312642	0.00399684	0.00341026	0.0031396	0.00383967	0.00363838	0.0035382	0.00250419	0.00347037	0.00359858	0.00437371
k__Bacteria;p__Proteobacteria;c__Alphaproteobacteria;o__Caulobacterales;f__Caulobacteraceae;g__Caulobacter	0.000636476	0.000146149	0.000248808	0.000183121	0.0015141	0.000213188	0.000103454	0.000928868	0.000691041	0.00229643	0.00306375	0.00211266	0.00311685	0.00267497	0.00236705	0.00223838	0.00208197	0.00246606	0.00225749	0.00222974	0.00227857	0.00243117	0.00290813	0.00276901	0.00328633	0.00209019	0.00382305	0.0132421	0.00253258	0.00264839
k__Bacteria;p__Proteobacteria;c__Gammaproteobacteria;o__Oceanospirillales;f__Halomonadaceae;g__Halomonas	0.00639667	0.00892572	0.00795471	0.00671417	0.00199737	0.000308628	0.000247335	0.000820273	0.00227729	0.00326042	0.00140651	0.00138154	0.00116679	0.001489	0.00153255	0.00138036	0.00183454	0.00160209	0.00176414	0.00170665	0.00147924	0.0013557	0.00135642	0.0015367	0.00149554	0.00142037	0.00121831	0.001568	0.00167314	0.00185653
k__Bacteria;p__Proteobacteria;c__Alphaproteobacteria;o__Rhodospirillales;f__Rhodospirillaceae;g__Azospirillum	0.000403237	0.00016475	0.000220986	0.000136205	0.000831253	3.95e-05	9.42e-05	0.000745294	0.000404008	0.00116922	0.00311852	0.00304518	0.002705	0.00317005	0.00312142	0.0028446	0.00349225	0.00416639	0.00334573	0.00315611	0.00327896	0.0030053	0.00296428	0.00332297	0.00347266	0.00318699	0.00291744	0.00339605	0.00327052	0.00355798
k__Archaea;p__Thaumarchaeota;c__Nitrososphaeria;o__Nitrososphaerales;f__Nitrososphaeraceae;g__Nitrososphaera	6.96e-06	8.86e-06	2.23e-05	1.66e-05	1.07e-05	2.37e-06	3.41e-06	7.75e-06	3.84e-06	1.28e-05	0.0035009	0.00269886	0.00232377	0.00390497	0.00383084	0.00375646	0.00384045	0.00111516	0.00281722	0.00656093	0.00328105	0.0031461	0.00274934	0.00332888	0.00256452	0.00316753	0.0017105	0.00270446	0.0088496	0.002376
k__Bacteria;p__Bacteroidetes;c__Flavobacteriia;o__Flavobacteriales;f__Flavobacteriaceae;g__Flavobacterium	0.00218386	0.000172722	0.000126391	0.000119558	0.000925549	9.23e-05	0.000178618	0.00107433	0.000979755	0.00149921	0.00279711	0.00141639	0.00477886	0.00278383	0.00214372	0.0020672	0.00222777	0.0018857	0.00262024	0.00174164	0.00264519	0.00240856	0.00386672	0.00269902	0.00368756	0.0018784	0.00344982	0.00474526	0.00432608	0.00319817
k__Bacteria;p__Firmicutes;c__Bacilli;o__Bacillales;f__Paenibacillaceae;g__Paenibacillus	0.000311566	0.000370244	0.000429254	0.000318569	0.000394865	6.91e-05	5.45e-05	0.000342671	0.000272621	0.000782475	0.00288793	0.00285013	0.00239326	0.00317087	0.00329056	0.00295279	0.00371148	0.00302796	0.00359033	0.003993	0.00311359	0.00298527	0.00282943	0.00304776	0.00292502	0.00282025	0.00220285	0.00286425	0.00326577	0.00338648
k__Bacteria;p__Proteobacteria;c__Betaproteobacteria;o__Burkholderiales;f__Oxalobacteraceae;g__Massilia	0.000247164	0.000114262	0.000120827	9.38e-05	0.000558008	5.96e-05	0.000123478	0.000473419	0.00076382	0.00107237	0.00261971	0.00220555	0.00275868	0.00270226	0.00293842	0.00258661	0.00342012	0.00241336	0.00319498	0.00299836	0.00307467	0.00281769	0.00300354	0.00383297	0.00303718	0.00284107	0.00276677	0.00363273	0.00417534	0.00390387
k__Bacteria;p__Proteobacteria;c__Betaproteobacteria;o__Burkholderiales;f__unclassified;g__Rhizobacter	0.000361462	0.000162978	0.000148649	0.000119558	0.000815716	3.13e-05	6.14e-05	0.000542356	0.000358611	0.00214732	0.00231385	0.00183604	0.0027685	0.00320645	0.00320172	0.00281	0.00225574	0.00130933	0.00260324	0.0021462	0.00322504	0.00287183	0.00409853	0.00311854	0.0040052	0.00274141	0.00283899	0.00375928	0.00382279	0.0031662
k__Bacteria;p__Proteobacteria;c__Alphaproteobacteria;o__Rhizobiales;f__Hyphomicrobiaceae;g__Rhodomicrobium	0.00358387	0.000574853	0.000528618	0.000692378	0.00461516	6.63e-05	0.00113762	0.00436023	0.00725629	0.00166019	0.00143213	0.00395041	0.00203905	0.00152198	0.00467884	0.00225682	0.00145487	0.00215767	0.00173372	0.00184129	0.00138867	0.00153378	0.00114028	0.00146139	0.00131164	0.00186612	0.00163781	0.00180723	0.00101094	0.00160718
k__Bacteria;p__Planctomycetes;c__Planctomycetia;o__Planctomycetales;f__Planctomycetaceae;g__Planctomyces	0.000399175	6.2e-05	0.000171702	4.69e-05	0.00305686	2.68e-05	3.08e-05	0.000437789	0.000324023	0.000786964	0.00283687	0.00276342	0.00272413	0.0027887	0.00256781	0.00277264	0.00285509	0.00258958	0.00259732	0.00275749	0.00283278	0.00282027	0.00272902	0.00280804	0.00275151	0.00288476	0.0027474	0.00258612	0.00267478	0.00268867
k__Bacteria;p__Actinobacteria;c__Actinobacteria;o__Micrococcales;f__Cellulomonadaceae;g__Cellulomonas	0.00014795	0.000139949	5.64e-05	5.22e-05	0.000283424	2.13e-05	3.5e-05	0.000310604	0.000122259	0.000548694	0.0027934	0.00370041	0.00420854	0.00385102	0.00275436	0.00293696	0.00163345	0.00132596	0.00226737	0.00152897	0.00280829	0.0049964	0.00356963	0.00289774	0.00357719	0.00269482	0.00402175	0.00213413	0.00167579	0.00251469
k__Bacteria;p__Proteobacteria;c__Gammaproteobacteria;o__Vibrionales;f__Vibrionaceae;g__Vibrio	0.0074915	0.0109789	0.00931878	0.00808531	0.00227677	0.000291223	0.000326215	0.000953964	0.00254343	0.00359297	0.000631691	0.000591866	0.000541511	0.000639048	0.000649015	0.000576361	0.000786231	0.000627403	0.00072016	0.000641187	0.000654843	0.000587415	0.000601397	0.00065174	0.000653791	0.000599513	0.000569366	0.0006894	0.000699972	0.000898992
k__Bacteria;p__Bacteroidetes;c__Sphingobacteriia;o__Sphingobacteriales;f__Sphingobacteriaceae;g__Pedobacter	0.00276115	0.000209038	0.000106519	0.000126368	0.00905404	0.000231165	0.000107398	0.000851876	0.00106647	0.00147644	0.00238435	0.00147786	0.00269672	0.00186629	0.00168659	0.00234461	0.0020505	0.00137101	0.00221066	0.00165534	0.00187434	0.0018622	0.00222906	0.00210367	0.00240757	0.00170621	0.00238827	0.00242048	0.00259675	0.00264756
k__Eukaryota;p__unclassified;c__Oomycetes;o__Peronosporales;f__Peronosporaceae;g__Phytophthora	0.00118302	0.00174139	0.00188872	0.00175402	0.00054381	0.000132701	0.000225187	0.0285345	0.0179262	0.000649069	3.53e-05	2.87e-05	4.13e-05	2.94e-05	3.57e-05	2.79e-05	3.69e-05	2.71e-05	2.92e-05	3.63e-05	3.59e-05	2.9e-05	3.87e-05	3.84e-05	3.94e-05	3.12e-05	2.67e-05	3.45e-05	4.18e-05	4.63e-05
k__Bacteria;p__Proteobacteria;c__Alphaproteobacteria;o__Caulobacterales;f__Caulobacteraceae;g__Brevundimonas	0.000843606	0.000233839	9.22e-05	7.64e-05	0.00197326	0.000122569	5.7e-05	0.000909504	0.000446282	0.00208991	0.00397126	0.0018017	0.00344708	0.00209994	0.00158763	0.00374651	0.00146099	0.00154457	0.001483	0.00119056	0.00240065	0.00201927	0.00227935	0.00331627	0.00208424	0.00124664	0.00521701	0.0033966	0.00208682	0.00193958
k__Bacteria;p__Chloroflexi;c__Thermomicrobia;o__Sphaerobacterales;f__Sphaerobacteraceae;g__Nitrolancea	0.00594701	0.00882209	0.00963039	0.00912274	0.00297676	0.000676825	0.000380445	0.00149617	0.00238297	0.00358399	0.000445806	0.000481804	0.000445245	0.000512311	0.00049107	0.000499502	0.000540766	0.000490917	0.000476353	0.000510575	0.000430993	0.000425985	0.000376476	0.000435282	0.000388412	0.000456503	0.000403008	0.000407065	0.000433424	0.000503893
k__Bacteria;p__Planctomycetes;c__Planctomycetia;o__Planctomycetales;f__Planctomycetaceae;g__Rhodopirellula	5.8e-05	2.83e-05	8.35e-05	2.65e-05	0.000188057	1.42e-05	1.62e-05	0.000184658	6.37e-05	0.000536508	0.00274198	0.00262605	0.0022896	0.00264198	0.00264563	0.00267995	0.00294383	0.0027372	0.00275478	0.00290082	0.0026564	0.0025095	0.00232275	0.00254112	0.00255479	0.00265437	0.00232006	0.0024486	0.00278489	0.00270591
k__Bacteria;p__Proteobacteria;c__Alphaproteobacteria;o__Rhodospirillales;f__Rhodospirillaceae;g__Skermanella	0.0001172	3.63e-05	6.44e-05	5.07e-05	0.000151624	7.68e-06	2.34e-05	0.000159097	9.2e-05	0.000231856	0.00217761	0.00279638	0.00248838	0.00235926	0.00247933	0.00260945	0.00163323	0.00141739	0.00192339	0.00111741	0.00304429	0.00332677	0.00312651	0.0035065	0.00369665	0.0034824	0.00430387	0.00242431	0.00196512	0.00281947
k__Bacteria;p__Actinobacteria;c__Actinobacteria;o__Propionibacteriales;f__Nocardioidaceae;g__Marmoricola	0.00014853	6.55e-05	3.9e-05	3.48e-05	0.000285835	1.51e-05	1.34e-05	0.000113707	2.14e-05	0.00024276	0.00302487	0.00305463	0.00354041	0.00270649	0.00254578	0.00317309	0.00187345	0.00139545	0.00204766	0.00157074	0.0029148	0.00318279	0.00301921	0.00254171	0.00256209	0.00291565	0.00327146	0.00235309	0.00236931	0.00222776
k__Bacteria;p__Proteobacteria;c__Alphaproteobacteria;o__Rhizobiales;f__Bradyrhizobiaceae;g__Rhodopseudomonas	0.000741491	0.000111605	0.000240859	0.000481259	0.00143186	5.86e-05	0.000135689	0.00128161	0.000508973	0.00143475	0.00250733	0.0025596	0.00222176	0.00248746	0.00238339	0.00209494	0.00203869	0.00228053	0.00199037	0.00202152	0.00263703	0.00266737	0.0024421	0.0026253	0.00244068	0.00263475	0.00226097	0.00223384	0.00202986	0.00227509
k__Bacteria;p__Proteobacteria;c__Betaproteobacteria;o__Burkholderiales;f__Burkholderiaceae;g__Cupriavidus	0.000291839	6.11e-05	9.7e-05	7.26e-05	0.000483804	0.00016367	6.54e-05	0.00040789	0.000303847	0.000788568	0.00231561	0.00205548	0.00202184	0.00254839	0.00249568	0.00217408	0.00304001	0.00223099	0.00285831	0.00249499	0.0025945	0.00233459	0.00239457	0.00260893	0.00268951	0.00233132	0.00180689	0.00259287	0.00281071	0.00290148
k__Eukaryota;p__unclassified;c__Oomycetes;o__Peronosporales;f__Peronosporaceae;g__Plasmopara	0.00813784	0.00985842	0.0105175	0.00799223	0.00379328	0.000844989	0.000448858	0.00199577	0.00268346	0.00422023	4.77e-06	1.01e-05	4.35e-05	4.39e-06	5.69e-06	4.24e-06	5.68e-06	6.48e-06	2.96e-06	7.42e-06	1.4e-05	6.35e-06	2.63e-05	6.51e-06	6.65e-06	4.61e-06	6.45e-05	5.3e-06	6.83e-06	0.000367487
k__Bacteria;p__Proteobacteria;c__Betaproteobacteria;o__Burkholderiales;f__Comamonadaceae;g__Ramlibacter	0.000337674	4.69e-05	4.21e-05	2.19e-05	0.000544882	9.32e-06	3.55e-05	0.000428184	7.78e-05	0.00168585	0.00246598	0.00171138	0.0021802	0.00230873	0.00265167	0.00230038	0.00261553	0.00134541	0.00264809	0.002555	0.00251723	0.00232864	0.00259555	0.00251056	0.00257102	0.00206527	0.00230805	0.00212609	0.00283842	0.0025859
k__Bacteria;p__Proteobacteria;c__Betaproteobacteria;o__Burkholderiales;f__unclassified;g__Methylibium	0.000271532	7.26e-05	0.000131956	4.84e-05	0.000620158	1.57e-05	4.13e-05	0.000575353	0.000266616	0.00326683	0.00188871	0.00156629	0.00197606	0.00224244	0.00220999	0.00190728	0.00192853	0.000979507	0.00227171	0.00168184	0.00234958	0.00223484	0.00265169	0.00257857	0.00312547	0.00226136	0.00233191	0.0020156	0.00315243	0.00277629
k__Bacteria;p__Proteobacteria;c__Gammaproteobacteria;o__Xanthomonadales;f__Xanthomonadaceae;g__Stenotrophomonas	0.000575555	0.000186008	0.000116058	0.000121828	0.00213533	0.000106226	0.00116651	0.00801838	0.00144405	0.00153929	0.00264957	0.00127542	0.00286681	0.00167391	0.0015512	0.00145706	0.00114667	0.00096122	0.00124373	0.00107713	0.00121817	0.00152764	0.00159529	0.00128298	0.00160835	0.00110448	0.00338434	0.00289731	0.00131394	0.00169231
k__Bacteria;p__Proteobacteria;c__Gammaproteobacteria;o__Xanthomonadales;f__Xanthomonadaceae;g__Arenimonas	9.75e-05	0.000100976	3.34e-05	3.18e-05	0.000416296	4.9e-06	1.21e-05	0.000134621	4.61e-05	0.000753292	0.00216736	0.00180651	0.00342808	0.00169015	0.00140108	0.00174915	0.00121443	0.0014656	0.00172186	0.00157265	0.00184226	0.0015201	0.00267029	0.0021356	0.00253401	0.00145159	0.00991044	0.00189635	0.00295556	0.00166781
k__Bacteria;p__Actinobacteria;c__Thermoleophilia;o__Solirubrobacterales;f__Patulibacteraceae;g__Patulibacter	0.000742071	0.000162978	0.00028299	0.000103667	0.00100511	8e-05	3.02e-05	0.00104087	4.68e-05	0.00209985	0.00202636	0.00228505	0.00194648	0.0021984	0.0020755	0.00237463	0.00191498	0.0026205	0.00176177	0.00342942	0.00201238	0.00215115	0.00186878	0.00191855	0.00171304	0.00253321	0.00189271	0.00156635	0.00165491	0.00146268
k__Bacteria;p__Actinobacteria;c__Actinobacteria;o__Micrococcales;f__Intrasporangiaceae;g__Phycicoccus	8.64e-05	2.39e-05	3.18e-05	2.65e-05	8.97e-05	2.31e-05	1.34e-05	0.000125946	2.47e-05	0.000175415	0.00245662	0.00246328	0.0029479	0.00222944	0.00261667	0.00361107	0.00166252	0.000759068	0.00194117	0.000860429	0.00266589	0.00291368	0.00244778	0.00256635	0.00236813	0.00333102	0.00303032	0.00169784	0.00171699	0.00202824
k__Bacteria;p__Planctomycetes;c__Planctomycetia;o__Planctomycetales;f__Gemmataceae;g__Zavarzinella	3.89e-05	1.77e-05	4.77e-05	2.35e-05	0.000122424	6.62e-06	8.87e-06	0.000103793	2.31e-05	0.000293428	0.00217567	0.00202474	0.00204211	0.00244034	0.00226329	0.00246634	0.00246012	0.00164614	0.00218201	0.00217461	0.00269684	0.00274352	0.00225317	0.00251569	0.00240952	0.00293459	0.00212312	0.00229173	0.00216636	0.0022207
k__Bacteria;p__Verrucomicrobia;c__Spartobacteria;o__Chthoniobacterales;f__Chthoniobacteraceae;g__Chthoniobacter	0.00014621	1.15e-05	0.000105724	8.25e-05	0.00018377	1.15e-05	6.48e-05	0.000378766	2.79e-05	0.000380655	0.00187228	0.00142841	0.00358173	0.00255587	0.00190725	0.00315057	0.00223716	0.0010864	0.00189612	0.00163138	0.00216598	0.00230464	0.00242488	0.00236409	0.00272765	0.00228866	0.00179985	0.00263707	0.00263396	0.00232742
k__Bacteria;p__Verrucomicrobia;c__Opitutae;o__Opitutales;f__Opitutaceae;g__Opitutus	0.000110237	7.35e-05	0.000201908	5.83e-05	0.000274852	3.11e-05	1.99e-05	0.000342516	9.68e-05	0.000797547	0.00176856	0.00168082	0.00198728	0.0019485	0.00190707	0.00238034	0.00214995	0.00199642	0.00213894	0.0027384	0.00192105	0.00197345	0.00217464	0.00229942	0.00254553	0.00196151	0.00166519	0.00232935	0.00397277	0.00251406
k__Bacteria;p__Proteobacteria;c__Betaproteobacteria;o__Nitrosomonadales;f__Nitrosomonadaceae;g__Nitrosomonas	9.52e-05	3.01e-05	5.25e-05	4.46e-05	0.000161268	8.5e-06	2.28e-05	0.00014438	7.49e-05	0.000400537	0.00208326	0.00188721	0.0019285	0.00221335	0.00225672	0.00201514	0.00271476	0.00184131	0.0025331	0.00205015	0.00221022	0.00214976	0.00227677	0.00236468	0.00227285	0.00201783	0.001792	0.00227876	0.00231444	0.00259441
k__Bacteria;p__Proteobacteria;c__Alphaproteobacteria;o__Sphingomonadales;f__Erythrobacteraceae;g__Erythrobacter	0.000310985	0.000336586	8.43e-05	8.32e-05	0.0010978	0.000103285	4.39e-05	0.0011851	0.000363895	0.00259628	0.00207371	0.00197632	0.00285367	0.00145228	0.00147054	0.00213916	0.00140372	0.00276546	0.00182282	0.0014537	0.0020325	0.0018142	0.00168209	0.00230731	0.00191106	0.0014417	0.00237385	0.00166844	0.00221212	0.00164144
k__Bacteria;p__Proteobacteria;c__Deltaproteobacteria;o__Myxococcales;f__Archangiaceae;g__Archangium	5.05e-05	3.37e-05	4.61e-05	3.1e-05	0.000174662	7.68e-06	1.72e-05	0.000129509	3.82e-05	0.000529453	0.00212637	0.00151718	0.00224841	0.00174654	0.00198311	0.00167833	0.00232022	0.00137167	0.00228653	0.00225115	0.00205946	0.00193161	0.00213675	0.00207508	0.0021357	0.00195656	0.00178127	0.00221685	0.00332842	0.00319983
k__Bacteria;p__Proteobacteria;c__Betaproteobacteria;o__Burkholderiales;f__Comamonadaceae;g__Acidovorax	0.000592381	0.000105405	0.000108108	7.87e-05	0.00120817	7.49e-05	0.00039349	0.00154527	0.00439749	0.00303209	0.00149945	0.0011657	0.00165896	0.00153823	0.00157092	0.00132847	0.00159345	0.00108175	0.00173056	0.00145921	0.00166264	0.00149273	0.00198485	0.00161851	0.00178397	0.00138367	0.00174397	0.00168013	0.00191197	0.00184491
k__Bacteria;p__Actinobacteria;c__Actinobacteria;o__Jiangellales;f__Jiangellaceae;g__Jiangella	0.000570913	6.82e-05	5.41e-05	6.28e-05	0.000402902	5.28e-05	3.97e-05	0.000410369	4.49e-05	0.000544526	0.00172845	0.00207316	0.00144628	0.00176327	0.00191915	0.00238736	0.00199279	0.00368545	0.00168077	0.00403011	0.00169151	0.00168332	0.00151004	0.00141644	0.00123811	0.00221494	0.00157216	0.00161621	0.00201847	0.00136821
k__Bacteria;p__Acidobacteria;c__Solibacteres;o__Solibacterales;f__Solibacteraceae;g__Candidatus Solibacter	1.91e-05	9.74e-06	5.72e-05	2.8e-05	0.000102065	5.15e-06	1.06e-05	0.00010054	1.85e-05	0.000287656	0.00193094	0.00159668	0.0015641	0.0022452	0.00212809	0.00164504	0.00274886	0.00153692	0.00232763	0.00175394	0.00241299	0.00205774	0.00194214	0.00221071	0.00220046	0.00203575	0.00151276	0.00204117	0.00214814	0.00259524
k__Bacteria;p__Proteobacteria;c__Alphaproteobacteria;o__Rhodospirillales;f__Acetobacteraceae;g__Roseomonas	0.00076702	4.25e-05	8.35e-05	8.17e-05	0.00106083	2.42e-05	4e-05	0.000486122	0.000213053	0.000449282	0.0018009	0.00182453	0.00168854	0.00178277	0.00174699	0.00168209	0.00168765	0.00176401	0.00165844	0.00158028	0.00209763	0.00215313	0.00204341	0.00223634	0.00227691	0.00202227	0.00192009	0.00209504	0.00193399	0.00198194
k__Bacteria;p__Actinobacteria;c__Actinobacteria;o__Propionibacteriales;f__Nocardioidaceae;g__Aeromicrobium	0.000371906	0.000242696	4.93e-05	4.01e-05	0.000322268	8.19e-05	1.62e-05	0.000195967	3.19e-05	0.000320045	0.00276937	0.00240696	0.00259522	0.00225186	0.00205613	0.00263312	0.00134252	0.00127642	0.00125658	0.000976835	0.0016784	0.00209681	0.00217516	0.00187696	0.00191739	0.00256188	0.00298581	0.00174404	0.00129496	0.00144981
k__Bacteria;p__Bacteroidetes;c__Cytophagia;o__Cytophagales;f__Cytophagaceae;g__Ohtaekwangia	0.000457775	0.000224095	9.94e-05	9.31e-05	0.000980734	1.59e-05	0.000153134	0.000292324	0.000222661	0.00096238	0.00173039	0.00177028	0.00178442	0.00143684	0.0013659	0.00174703	0.00207039	0.00233605	0.00227487	0.00196788	0.00163625	0.00154846	0.0017744	0.00151954	0.00190245	0.001483	0.00170858	0.00221357	0.00227571	0.00212831
k__Bacteria;p__Acidobacteria;c__Blastocatellia;o__Blastocatellales;f__Pyrinomonadaceae;g__Pyrinomonas	6.38e-06	4.43e-06	2.46e-05	1.89e-05	3.11e-05	3.51e-06	5.84e-06	3.87e-05	1.56e-05	0.000185357	0.00174188	0.00123112	0.00156142	0.00200667	0.00188699	0.00221928	0.00306077	0.00113378	0.00263486	0.0020194	0.00185536	0.00163651	0.00145234	0.00188031	0.00191106	0.00206476	0.00145928	0.00211039	0.00173844	0.0025313
k__Bacteria;p__Proteobacteria;c__Betaproteobacteria;o__Burkholderiales;f__Alcaligenaceae;g__Bordetella	0.000406718	4.25e-05	7.87e-05	6.58e-05	0.000518361	3.06e-05	0.000141226	0.000616715	0.000696325	0.000724431	0.00164063	0.00153075	0.00142218	0.00169909	0.00174699	0.00162399	0.00204001	0.00184065	0.0018736	0.00177111	0.00183447	0.00164008	0.00169828	0.00182826	0.00190554	0.00164973	0.00136626	0.00188028	0.00206232	0.00204318
k__Bacteria;p__Proteobacteria;c__Alphaproteobacteria;o__Rhizobiales;f__Rhizobiaceae;g__Agrobacterium	0.00185083	0.000104519	8.11e-05	5.9e-05	0.000537381	2.97e-05	7.03e-05	0.000551961	0.0240457	0.000506685	0.000568611	0.000516145	0.000472404	0.000520435	0.000557517	0.000513209	0.00048787	0.000520841	0.000714628	0.000496369	0.000484914	0.000465847	0.000521487	0.000493832	0.000510633	0.000491317	0.000537824	0.000601924	0.00048867	0.000542925
k__Bacteria;p__Proteobacteria;c__Alphaproteobacteria;o__Rhodospirillales;f__Rhodospirillaceae;g__Dongia	0.000629513	0.000376445	0.000387123	0.000142259	0.00195263	0.000249958	6.27e-05	0.00180956	0.000454209	0.00207837	0.00132717	0.0014552	0.00200909	0.00175742	0.00151087	0.000989376	0.00129574	0.00321232	0.00131644	0.0010873	0.00125482	0.00125991	0.00127564	0.00132674	0.00174063	0.00135244	0.00152957	0.00115947	0.0011427	0.00145458
k__Bacteria;p__Proteobacteria;c__Alphaproteobacteria;o__Rhodospirillales;f__Acetobacteraceae;g__Acetobacter	0.00395404	0.0062605	0.00653579	0.00620113	0.00193254	0.000443781	0.000240281	0.000970075	0.00162396	0.00234422	0.00031346	0.000322977	0.000307286	0.000328704	0.000355155	0.00032506	0.000380766	0.000374048	0.000360179	0.000343705	0.000343275	0.000303029	0.000321021	0.000327644	0.000338744	0.000318955	0.000284203	0.000363236	0.000356915	0.000360635
k__Bacteria;p__Proteobacteria;c__Deltaproteobacteria;o__Myxococcales;f__Myxococcaceae;g__Myxococcus	5.45e-05	1.68e-05	3.1e-05	3.1e-05	0.000119745	3.26e-05	2.07e-05	0.000162196	3.8e-05	0.000388672	0.00151023	0.00146361	0.00131993	0.00172298	0.00176281	0.00160686	0.00217399	0.00126578	0.00207532	0.00199099	0.00181226	0.0016849	0.00185655	0.00195384	0.00196154	0.00184513	0.0014785	0.00187736	0.00214149	0.00221343
k__Bacteria;p__Bacteroidetes;c__Chitinophagia;o__Chitinophagales;f__Chitinophagaceae;g__Flavisolibacter	0.00011894	2.39e-05	4.13e-05	5.37e-05	0.00018002	7.52e-06	2.32e-05	0.000187447	0.000108328	0.000461147	0.00169523	0.000984212	0.00155147	0.0014877	0.0014128	0.00147272	0.00179935	0.000715346	0.00184653	0.000875696	0.00185061	0.00175828	0.00182004	0.00206483	0.00250009	0.00160126	0.00193706	0.00207222	0.0026744	0.00287387
k__Bacteria;p__Actinobacteria;c__Thermoleophilia;o__Thermoleophilales;f__Thermoleophilaceae;g__Thermoleophilum	9.05e-05	3.1e-05	5.17e-05	2.19e-05	0.000101529	9.89e-06	5.46e-06	0.000144226	6.73e-06	0.00037841	0.00187405	0.00200362	0.00148466	0.00192933	0.00173882	0.00197908	0.0016623	0.00235068	0.0013439	0.00362237	0.00186504	0.00179041	0.0015574	0.00155089	0.0013605	0.0020465	0.00149691	0.0012159	0.00129534	0.00115333
k__Bacteria;p__Actinobacteria;c__Actinobacteria;o__Pseudonocardiales;f__Pseudonocardiaceae;g__Lentzea	0.00032375	0.000308242	0.000138315	0.000600061	0.000785444	0.000386418	0.000113314	0.00106721	0.00872869	0.00193695	0.000848675	0.00120417	0.00126994	0.00110797	0.00116993	0.00124003	0.000684373	0.000700051	0.000784767	0.00117127	0.000731739	0.00113973	0.00124309	0.000815562	0.00111086	0.00190212	0.00183171	0.00092133	0.000794136	0.000759057
k__Bacteria;p__Proteobacteria;c__Deltaproteobacteria;o__Myxococcales;f__Kofleriaceae;g__Haliangium	6.79e-05	1.95e-05	5.25e-05	4.01e-05	7.85e-05	1.18e-05	5.11e-05	9.99e-05	3.17e-05	0.000287014	0.00152136	0.00133913	0.00109462	0.00156748	0.00162422	0.00160539	0.00255192	0.00125481	0.0024602	0.00191148	0.00134918	0.0014961	0.00169345	0.00168297	0.00189645	0.00163164	0.00107309	0.00200483	0.00230628	0.00270424
k__Bacteria;p__Actinobacteria;c__Actinobacteria;o__Actinomycetales;f__Actinomycetaceae;g__Actinomyces	8.01e-05	5.05e-05	5.64e-05	3.33e-05	0.000159393	2.53e-05	4.38e-05	0.000170096	3.12e-05	0.000300162	0.00186928	0.00208415	0.00158819	0.00168804	0.00177293	0.00180823	0.0017506	0.00159993	0.00162169	0.00205439	0.00167062	0.00173448	0.0015512	0.00156331	0.00150041	0.00183659	0.00162756	0.00155138	0.00166345	0.0015287
k__Bacteria;p__Proteobacteria;c__Alphaproteobacteria;o__Rhizobiales;f__Phyllobacteriaceae;g__Phyllobacterium	0.00261553	0.000209923	9.7e-05	0.000121828	0.0040392	6.01e-05	0.000117941	0.00197578	0.000281989	0.000963342	0.00124024	0.00159909	0.00111834	0.00136405	0.00124633	0.00137971	0.00108722	0.00135389	0.0010752	0.00132775	0.0011371	0.00128886	0.00118333	0.00120393	0.00115988	0.00125961	0.000970133	0.00104953	0.00112333	0.00092453
k__Bacteria;p__Proteobacteria;c__Deltaproteobacteria;o__Myxococcales;f__unclassified;g__Minicystis	3.83e-05	2.04e-05	4.45e-05	2.65e-05	0.000152696	7.35e-06	1.87e-05	0.000228344	3.1e-05	0.000669273	0.00140244	0.00106182	0.00116412	0.00151873	0.00141209	0.00120494	0.00200001	0.000979507	0.00174221	0.0016528	0.00167878	0.00174737	0.00224801	0.00186395	0.00197923	0.00169273	0.00116627	0.00180778	0.00239437	0.00226243
k__Bacteria;p__Proteobacteria;c__Betaproteobacteria;o__Burkholderiales;f__Comamonadaceae;g__Hydrogenophaga	0.000760638	0.000324185	6.04e-05	6.13e-05	0.000971894	0.000100915	4.03e-05	0.00130051	0.00127327	0.00238623	0.00118652	0.000961547	0.00146515	0.00160339	0.0012394	0.00141022	0.00124088	0.000863967	0.00146996	0.00115367	0.00116615	0.00119704	0.00151899	0.00124296	0.00133582	0.0010654	0.00233255	0.0011812	0.00159378	0.00149777
k__Bacteria;p__Bacteroidetes;c__Chitinophagia;o__Chitinophagales;f__Chitinophagaceae;g__Pseudoflavitalea	0.0014151	0.000186008	0.000162957	0.000174797	0.00164268	2.4e-05	0.000127346	0.000690764	0.000794325	0.000681459	0.00129554	0.000751208	0.00108914	0.0010589	0.00106919	0.00115566	0.00131104	0.000512196	0.00137196	0.000884389	0.00123507	0.00122262	0.00303816	0.00138569	0.00165477	0.00118128	0.00133744	0.00192046	0.00141627	0.00276259
k__Bacteria;p__Proteobacteria;c__Deltaproteobacteria;o__Myxococcales;f__Anaeromyxobacteraceae;g__Anaeromyxobacter	2.73e-05	1.42e-05	4.13e-05	2.72e-05	7.45e-05	4.25e-06	1.59e-05	0.000116961	2.52e-05	0.000283807	0.00144238	0.00122597	0.00111872	0.00170543	0.00169511	0.00141528	0.00230842	0.00135838	0.00206386	0.00216804	0.0016055	0.00141321	0.00145217	0.00165202	0.0016736	0.00156081	0.0010425	0.00174879	0.0019319	0.00204028
k__Bacteria;p__Proteobacteria;c__Deltaproteobacteria;o__Myxococcales;f__Labilitrichaceae;g__Labilithrix	0.000267471	2.13e-05	5.56e-05	4.92e-05	0.000244313	8.91e-06	2.64e-05	0.000373034	3.8e-05	0.000680497	0.00130137	0.000998978	0.00113479	0.00140922	0.00143679	0.00127625	0.00144066	0.00134208	0.00150058	0.00186144	0.00167613	0.00171049	0.00174116	0.0019014	0.00213618	0.00139391	0.00100888	0.0017035	0.00213997	0.00227592
k__Bacteria;p__Proteobacteria;c__Alphaproteobacteria;o__Rhizobiales;f__Rhizobiaceae;g__Sinorhizobium	0.000569173	0.000534994	0.000530208	0.000472179	0.000803393	7.31e-05	8.94e-05	0.00105218	0.000950932	0.000634638	0.00133282	0.00144369	0.00118388	0.00137851	0.00140854	0.00136763	0.00140306	0.00152595	0.00144743	0.00155208	0.00136589	0.00134181	0.00127392	0.00134015	0.00130385	0.00133777	0.00130974	0.00131488	0.00130198	0.00135493
k__Bacteria;p__Proteobacteria;c__Deltaproteobacteria;o__Myxococcales;f__Polyangiaceae;g__Chondromyces	5.4e-05	2.13e-05	4.29e-05	2.35e-05	0.000149749	6.46e-06	1.98e-05	0.00022602	3.65e-05	0.000667669	0.00138301	0.00102542	0.00113798	0.00145049	0.00139433	0.0012131	0.00192372	0.000962716	0.00172009	0.00158219	0.00149765	0.00158376	0.00191631	0.00163172	0.00183201	0.00158198	0.00111039	0.00175263	0.00217984	0.00212872
k__Bacteria;p__Proteobacteria;c__Deltaproteobacteria;o__Myxococcales;f__unclassified;g__Enhygromyxa	3.25e-05	6.2e-06	2.31e-05	1.51e-05	3.67e-05	4.82e-06	1.03e-05	6.13e-05	1.18e-05	0.000188884	0.00148072	0.00120897	0.000985481	0.0012092	0.00158265	0.00110475	0.00148831	0.00184381	0.00193663	0.0022221	0.00135905	0.00146457	0.00153535	0.00184995	0.00169551	0.00146866	0.0010614	0.00158918	0.00225407	0.00225682
k__Bacteria;p__Proteobacteria;c__Alphaproteobacteria;o__Rhizobiales;f__Rhizobiaceae;g__Kaistia	0.000214673	8.86e-05	5.96e-05	4.62e-05	0.000487018	2.55e-05	3.43e-05	0.000613462	0.000159009	0.000799151	0.00158197	0.00165438	0.00129238	0.00151873	0.00153397	0.00149704	0.00143738	0.00148788	0.00138203	0.00142062	0.00143139	0.00145783	0.00130923	0.00149865	0.00143889	0.00156952	0.00143799	0.00155485	0.00132799	0.00152289
k__Bacteria;p__Proteobacteria;c__Deltaproteobacteria;o__Myxococcales;f__Sandaracinaceae;g__Sandaracinus	5.8e-05	2.3e-05	6.12e-05	2.35e-05	0.000121889	2.21e-05	2.18e-05	0.000295887	1.83e-05	0.00106756	0.00200286	0.00119438	0.00105931	0.00127712	0.00164892	0.0013363	0.00179279	0.0010485	0.00176039	0.00161972	0.00146063	0.00136085	0.0014935	0.00164177	0.0016499	0.00133197	0.00112496	0.00162534	0.00193304	0.00171099
k__Bacteria;p__Bacteroidetes;c__Chitinophagia;o__Chitinophagales;f__Chitinophagaceae;g__Flavihumibacter	0.000157813	2.75e-05	6.04e-05	6.43e-05	0.000255832	7.03e-06	3.28e-05	0.000238569	0.000188313	0.000411761	0.00150634	0.000926176	0.00126153	0.00176035	0.00156648	0.00123252	0.00169421	0.000610779	0.00158613	0.00103154	0.00176157	0.00149194	0.00167692	0.00167311	0.00197744	0.00131285	0.00136738	0.00176979	0.00165529	0.00205813
k__Bacteria;p__Actinobacteria;c__Actinobacteria;o__Pseudonocardiales;f__Pseudonocardiaceae;g__Saccharothrix	0.000478082	0.000666971	0.000216217	0.000388186	0.000612389	0.000176662	0.000136372	0.00142119	0.000636277	0.00147644	0.00112697	0.00141382	0.00104949	0.00115396	0.00114808	0.00149932	0.00110667	0.00100511	0.000978192	0.00170093	0.00112988	0.00133567	0.00127737	0.00094252	0.0011034	0.00153778	0.00234103	0.00100771	0.00116339	0.000888404
k__Bacteria;p__Proteobacteria;c__Gammaproteobacteria;o__Enterobacterales;f__unclassified;g__Plesiomonas	0.00421571	0.00602754	0.00646504	0.00605509	0.00192798	0.000503757	0.000288064	0.000999974	0.00161315	0.00231055	1.63e-05	1.61e-05	4.45e-05	2.01e-05	1.87e-05	1.39e-05	1.73e-05	1.73e-05	1.82e-05	1.7e-05	1.8e-05	1.45e-05	2.76e-05	1.52e-05	1.74e-05	1.52e-05	1.31e-05	1.79e-05	2.54e-05	1.87e-05
k__Bacteria;p__Proteobacteria;c__Gammaproteobacteria;o__Nevskiales;f__Sinobacteraceae;g__Solimonas	0.000157813	3.1e-05	5.8e-05	5.3e-05	0.000333519	9.4e-06	4.56e-05	0.000283184	0.00016069	0.000800433	0.00123175	0.0010814	0.000928997	0.00134715	0.00154605	0.00114391	0.00204765	0.00143102	0.00208026	0.00112886	0.00134842	0.00121965	0.00128305	0.00141171	0.00147655	0.0013917	0.000796569	0.00209084	0.00198847	0.00175895
k__Bacteria;p__Proteobacteria;c__Gammaproteobacteria;o__Xanthomonadales;f__Rhodanobacteraceae;g__Rhodanobacter	0.000209451	0.000124005	7.23e-05	4.77e-05	0.000735885	3.98e-05	3.72e-05	0.000314787	0.000137632	0.00091556	0.00136693	0.00126976	0.00159661	0.00130166	0.00128542	0.00124557	0.0014682	0.00130701	0.00153575	0.00135468	0.00126203	0.00114806	0.0012753	0.0012816	0.00141114	0.00123896	0.00214089	0.00146354	0.00149145	0.00148676
k__Bacteria;p__Proteobacteria;c__Gammaproteobacteria;o__Xanthomonadales;f__Xanthomonadaceae;g__Xanthomonas	0.000284876	0.00020638	0.000111288	0.000113505	0.000668646	6.55e-05	0.000128028	0.000537554	0.000353087	0.000873229	0.00144909	0.00125602	0.00183874	0.00126331	0.00122519	0.00130138	0.00120241	0.00111499	0.00126981	0.00119735	0.00117393	0.00111791	0.00126514	0.00120866	0.00142737	0.00115619	0.00253653	0.00142719	0.00135988	0.00129285
k__Bacteria;p__Deinococcus-Thermus;c__Deinococci;o__Deinococcales;f__Deinococcaceae;g__Deinococcus	6.9e-05	7.44e-05	5.01e-05	2.88e-05	0.000126978	8.33e-06	1.65e-05	0.00012765	3.51e-05	0.000281242	0.00143266	0.00132041	0.00121894	0.00157739	0.00155458	0.00153359	0.00185552	0.00135671	0.00163552	0.0017622	0.00143291	0.00137632	0.00128598	0.00145607	0.00141373	0.00151917	0.00120678	0.00142683	0.00155315	0.00164352
k__Bacteria;p__Proteobacteria;c__Betaproteobacteria;o__unclassified;f__unclassified;g__Candidatus Accumulibacter	6.32e-05	1.77e-05	5.25e-05	2.35e-05	0.000137694	1.85e-05	1.6e-05	0.000119904	6.89e-05	0.000283807	0.0013323	0.00119764	0.00108876	0.00150476	0.00150945	0.00131117	0.00194973	0.00131848	0.00179912	0.00144437	0.00163587	0.00138168	0.00134298	0.00154951	0.0016262	0.00130244	0.000971414	0.00167337	0.00175002	0.00184761
k__Bacteria;p__Proteobacteria;c__Betaproteobacteria;o__Rhodocyclales;f__Rhodocyclaceae;g__Azospira	0.000140408	4.61e-05	3.66e-05	3.1e-05	0.00023199	6.46e-06	2.97e-05	0.000123467	9.8e-05	0.000384503	0.00123529	0.0011075	0.00107881	0.00130149	0.00126871	0.00133614	0.00188962	0.0019901	0.00176118	0.00153575	0.00135962	0.00123234	0.00137484	0.00141329	0.00155024	0.00118998	0.000922579	0.00176706	0.00189412	0.00191363
k__Bacteria;p__Actinobacteria;c__Actinobacteria;o__Pseudonocardiales;f__Pseudonocardiaceae;g__Kibdelosporangium	0.00210785	0.000903467	0.00163514	0.00193412	0.000508985	0.000498528	0.000862675	0.00145635	0.00172748	0.00208414	0.000792486	0.00120691	0.000712749	0.00083354	0.000919423	0.00107668	0.000662734	0.000636214	0.00050342	0.0013127	0.000705158	0.000869621	0.000858868	0.000920243	0.000600716	0.00106694	0.000802653	0.00066365	0.000579418	0.000551022
k__Bacteria;p__Proteobacteria;c__Betaproteobacteria;o__Nitrosomonadales;f__Methylophilaceae;g__Methylotenera	0.000226277	3.9e-05	3.26e-05	2.35e-05	0.000364862	4.66e-06	3.05e-05	0.000573959	0.00262461	0.00107943	0.00104375	0.000813022	0.00120313	0.000876599	0.00116087	0.000922961	0.00167213	0.000660153	0.00233948	0.00134726	0.00124494	0.000951922	0.0010819	0.00106889	0.00128567	0.000833822	0.000920657	0.00126576	0.00242095	0.00175418
k__Bacteria;p__Proteobacteria;c__Alphaproteobacteria;o__Rhizobiales;f__Phyllobacteriaceae;g__Aminobacter	0.000182762	0.000139949	9.62e-05	3.03e-05	0.000489697	5.88e-05	4.82e-05	0.0055114	0.000329788	0.000933839	0.00111814	0.00132453	0.00129085	0.00102397	0.00107222	0.0013518	0.00120525	0.00104451	0.000939073	0.00101733	0.000998878	0.00115103	0.00105055	0.0010746	0.00106412	0.00118844	0.00122872	0.000946715	0.000870645	0.000822796
k__Bacteria;p__Actinobacteria;c__Actinobacteria;o__Micromonosporales;f__Micromonosporaceae;g__Asanoa	0.000121841	3.28e-05	7.07e-05	8.7e-05	0.000424601	3.66e-05	5.96e-05	0.000377682	6.61e-05	0.000628545	0.00136286	0.00174847	0.00115047	0.00135073	0.00148298	0.00150585	0.00142886	0.00295863	0.00104813	0.00132309	0.00149442	0.00138743	0.00129114	0.00115917	0.0010323	0.00169683	0.001287	0.00114906	0.000837422	0.000942593
k__Bacteria;p__Bacteroidetes;c__Sphingobacteriia;o__Sphingobacteriales;f__Sphingobacteriaceae;g__Mucilaginibacter	0.00035508	6.38e-05	7.63e-05	9.38e-05	0.000549704	2.55e-05	6.05e-05	0.000311069	0.000361253	0.000563767	0.00127787	0.000977344	0.00136787	0.00122464	0.00119694	0.00132668	0.00146864	0.000940772	0.00148477	0.00116894	0.00129127	0.00123611	0.00137829	0.00137366	0.00153563	0.00124749	0.00117428	0.00151321	0.00165928	0.00172345
k__Bacteria;p__Proteobacteria;c__Alphaproteobacteria;o__Rhizobiales;f__Bradyrhizobiaceae;g__Variibacter	0.000160134	0.000103633	0.000128776	8.4e-05	0.000597656	1.23e-05	2.45e-05	0.000252201	9.7e-05	0.000542601	0.00156907	0.00148525	0.00125962	0.00162175	0.00135613	0.00130269	0.00109421	0.000854824	0.000964164	0.00101649	0.00167081	0.00167142	0.00156274	0.00164394	0.00148888	0.00161542	0.00131774	0.0012621	0.000997084	0.00123824
k__Bacteria;p__Cyanobacteria;c__unclassified;o__Nostocales;f__Nostocaceae;g__Nostoc	0.000195526	0.000121348	8.27e-05	0.000123342	0.000330037	2.9e-05	2.19e-05	0.000230823	0.000192877	0.000723469	0.00130508	0.00106234	0.00114218	0.00135008	0.00129501	0.00124737	0.00159651	0.000990645	0.00148418	0.00126668	0.00144202	0.0013319	0.00146095	0.00139357	0.00136731	0.0012934	0.00144647	0.00138592	0.00127882	0.00155694
k__Bacteria;p__Proteobacteria;c__Gammaproteobacteria;o__Xanthomonadales;f__Xanthomonadaceae;g__Luteimonas	8.88e-05	0.000227638	2.54e-05	2.42e-05	0.00045005	4.5e-05	1.74e-05	0.000202319	9.15e-05	0.000958211	0.00149062	0.00164167	0.00277526	0.00128411	0.000987114	0.00204566	0.000928964	0.000894556	0.00104082	0.00103599	0.00100173	0.000933876	0.00107569	0.00104267	0.00121214	0.000884848	0.00306059	0.00111345	0.00116491	0.00096377
k__Bacteria;p__Actinobacteria;c__Actinobacteria;o__Streptosporangiales;f__Streptosporangiaceae;g__Streptosporangium	0.000391633	6.11e-05	5.72e-05	9.91e-05	0.00344931	4.95e-05	3.69e-05	0.000703622	6.17e-05	0.000450564	0.00103633	0.00120571	0.00101315	0.00256691	0.00135613	0.00113281	0.0009788	0.00135289	0.000821911	0.00108476	0.00111906	0.00124424	0.00127168	0.00126563	0.000932318	0.00118025	0.00110399	0.000955663	0.000828499	0.000747845
k__Bacteria;p__Cyanobacteria;c__unclassified;o__Synechococcales;f__Leptolyngbyaceae;g__Leptolyngbya	0.000298221	0.000410989	0.000444357	0.000317056	0.000177341	3.32e-05	1.98e-05	0.000119594	0.000120818	0.000361414	0.00117839	0.00110578	0.00105956	0.00134488	0.00133694	0.00130791	0.00170361	0.00103254	0.00154306	0.0014308	0.00141183	0.00119149	0.00122983	0.00131925	0.00131018	0.00128435	0.00117012	0.00132273	0.00137868	0.00158455
k__Bacteria;p__Actinobacteria;c__Actinobacteria;o__Micromonosporales;f__Micromonosporaceae;g__Catellatospora	4.18e-05	2.57e-05	2.62e-05	3.33e-05	0.000126443	1.19e-05	1.98e-05	0.000123312	1.9e-05	0.000159702	0.00162932	0.00195829	0.00131954	0.00150005	0.00152669	0.00156508	0.00118951	0.00139478	0.00115384	0.00156141	0.00125633	0.00174658	0.00122656	0.0013295	0.00128551	0.00172823	0.00128508	0.00137405	0.000878619	0.00090792
k__Bacteria;p__Chloroflexi;c__Chloroflexia;o__Chloroflexales;f__Roseiflexaceae;g__Kouleothrix	1.97e-05	1.33e-05	4.45e-05	2.12e-05	4.8e-05	2.45e-06	1.46e-05	5.44e-05	6e-06	8.92e-05	0.001289	0.0012634	0.00127861	0.00167358	0.0017811	0.00168045	0.00156678	0.000505546	0.00170724	0.000984469	0.00124703	0.00138961	0.00142238	0.00150121	0.00151388	0.00162362	0.00131198	0.00115308	0.000918867	0.00186152
k__Bacteria;p__Proteobacteria;c__Alphaproteobacteria;o__Rhizobiales;f__Bradyrhizobiaceae;g__Nitrobacter	0.000255286	6.11e-05	7.79e-05	0.000231549	0.000488894	3.19e-05	5.71e-05	0.000439803	0.000164534	0.000549977	0.00134449	0.0016585	0.001642	0.00124462	0.00115217	0.00147762	0.0010494	0.000978842	0.00150631	0.000829897	0.00141772	0.0014263	0.00140929	0.00146001	0.00131586	0.00123452	0.0014311	0.000997119	0.000880517	0.00107298
k__Bacteria;p__Verrucomicrobia;c__Verrucomicrobiae;o__Verrucomicrobiales;f__Verrucomicrobiaceae;g__Verrucomicrobium	5.74e-05	2.48e-05	5.33e-05	2.27e-05	0.000129925	1.18e-05	1.69e-05	0.000297126	3.34e-05	0.000443509	0.00115524	0.000923085	0.00138381	0.00147259	0.00113813	0.00136731	0.0013906	0.00082091	0.00116964	0.00109621	0.00127437	0.00132416	0.00137398	0.00133404	0.00145464	0.00126558	0.00111215	0.00153969	0.00169554	0.00144379
k__Bacteria;p__Planctomycetes;c__Planctomycetia;o__Planctomycetales;f__Planctomycetaceae;g__Schlesneria	5.05e-05	2.66e-05	3.74e-05	1.97e-05	0.000154035	6.86e-06	6.75e-06	9.81e-05	2.4e-05	0.000300483	0.00132593	0.00121378	0.00118248	0.0013439	0.0012609	0.00129192	0.00138164	0.00115589	0.00125164	0.00140599	0.00136722	0.00133348	0.0012548	0.00136794	0.0013243	0.00138555	0.00117027	0.00120914	0.00139216	0.00133271
k__Bacteria;p__Actinobacteria;c__Actinobacteria;o__Micrococcales;f__Promicromonosporaceae;g__Promicromonospora	0.000820978	0.000538537	1.91e-05	0.00109343	0.00219105	6.91e-05	1.2e-05	0.0015287	5.79e-05	0.0020572	0.000496872	0.00186866	0.000963806	0.000537333	0.00401117	0.000758473	0.000747324	0.00106163	0.000790101	0.00096475	0.000520419	0.000656826	0.000561442	0.000568548	0.000440514	0.00116029	0.00071459	0.000451808	0.000628968	0.000367487
k__Bacteria;p__Actinobacteria;c__Acidimicrobiia;o__Acidimicrobiales;f__Acidimicrobiaceae;g__Acidimicrobium	3.42e-05	3.1e-05	2.07e-05	1.59e-05	0.000149213	5.47e-06	1.16e-05	6.71e-05	4.08e-06	0.000133406	0.0014141	0.00164528	0.00118464	0.00133106	0.00147872	0.00137286	0.0013941	0.000884914	0.00137097	0.00148359	0.00130912	0.00143344	0.0013125	0.00127135	0.00113488	0.00144648	0.00124873	0.0011255	0.00111422	0.00120689
k__Bacteria;p__Proteobacteria;c__Betaproteobacteria;o__Burkholderiales;f__Comamonadaceae;g__Rhodoferax	0.000328971	7.09e-05	5.48e-05	3.71e-05	0.000620962	2.54e-05	4e-05	0.000446154	0.000226744	0.00145752	0.00107202	0.000843586	0.00100448	0.00111659	0.00122643	0.00102397	0.00128088	0.000868955	0.00138599	0.00117381	0.00113406	0.00104513	0.00121296	0.00120274	0.00126863	0.00103332	0.000961326	0.00123745	0.00167769	0.00145022
k__Bacteria;p__Proteobacteria;c__Alphaproteobacteria;o__Rhodobacterales;f__Rhodobacteraceae;g__Paracoccus	0.000172899	8.77e-05	5.41e-05	6.05e-05	0.000298962	1.92e-05	4.05e-05	0.00032656	0.000226744	0.000468202	0.00126762	0.00128315	0.00116259	0.00117703	0.00123336	0.00120168	0.00124372	0.00117518	0.00120718	0.00114752	0.0013357	0.00123809	0.00123517	0.00124572	0.00126376	0.00125039	0.0013171	0.0011686	0.00117288	0.00125236
k__Bacteria;p__Proteobacteria;c__Deltaproteobacteria;o__Desulfuromonadales;f__Geobacteraceae;g__Geobacter	3.42e-05	1.51e-05	3.58e-05	1.89e-05	7.98e-05	1.1e-05	1e-05	7.81e-05	3.39e-05	0.000222877	0.00121514	0.00103555	0.000960108	0.00138777	0.0013492	0.0011413	0.0018411	0.00099929	0.00158	0.00136931	0.00127532	0.00116591	0.0011327	0.00130052	0.0012511	0.00122292	0.000892317	0.0013662	0.0013709	0.00160677
k__Bacteria;p__Proteobacteria;c__Gammaproteobacteria;o__Xanthomonadales;f__Rhodanobacteraceae;g__Dyella	0.000229178	7.35e-05	5.17e-05	6.36e-05	0.000533095	1.63e-05	4.14e-05	0.000283649	0.000145798	0.000773496	0.00117539	0.00109994	0.00114116	0.00113868	0.00116922	0.00101761	0.00130295	0.00111633	0.0013034	0.00116427	0.00113938	0.00107607	0.00114941	0.00118756	0.0012636	0.00107905	0.00150523	0.00124512	0.0012006	0.00127312
k__Bacteria;p__Proteobacteria;c__Gammaproteobacteria;o__Legionellales;f__Legionellaceae;g__Legionella	0.00139711	4.96e-05	5.88e-05	6.73e-05	0.000364594	3.75e-05	2.66e-05	0.00032625	9.68e-05	0.000755217	0.00108209	0.000918621	0.0010134	0.00105631	0.0010564	0.00100928	0.00111694	0.00113694	0.00126685	0.0013216	0.00110406	0.00105287	0.00111066	0.00124907	0.00127463	0.00110192	0.000920497	0.00123087	0.00148803	0.00123118
k__Bacteria;p__Proteobacteria;c__Betaproteobacteria;o__Burkholderiales;f__unclassified;g__Rubrivivax	6.79e-05	2.57e-05	7.31e-05	2.5e-05	0.000179484	1.54e-05	1.48e-05	0.000149028	9.85e-05	0.000395086	0.00123441	0.00093871	0.00109118	0.00114405	0.00129945	0.00110589	0.00110601	0.000670128	0.00119236	0.0010167	0.0013	0.00126784	0.0013683	0.00147578	0.00165672	0.0012591	0.0012822	0.00110834	0.00186906	0.00148988
k__Bacteria;p__Proteobacteria;c__Alphaproteobacteria;o__Rhizobiales;f__Rhizobiaceae;g__Ensifer	0.000430506	6.11e-05	8.74e-05	0.000101397	0.000713115	2.28e-05	0.000171564	0.00139563	0.000375185	0.000381938	0.00116567	0.00119987	0.00103916	0.00114551	0.00121826	0.0010695	0.0010835	0.00109555	0.00115937	0.00101267	0.00108299	0.00119109	0.0010769	0.00106494	0.00112725	0.00106216	0.00117908	0.00104643	0.000988921	0.000981417
k__Bacteria;p__Proteobacteria;c__Alphaproteobacteria;o__Rhizobiales;f__unclassified;g__Bauldia	5.11e-05	2.13e-05	3.42e-05	1.82e-05	0.000144927	5.88e-06	1.12e-05	0.000246314	4.52e-05	0.000344097	0.00141746	0.00137638	0.000929507	0.00122967	0.00132344	0.00125569	0.00120197	0.00118964	0.00117794	0.00118251	0.00113368	0.00113418	0.000971157	0.00121063	0.00118325	0.00140757	0.00108157	0.00142738	0.00116833	0.00133562
k__Bacteria;p__Actinobacteria;c__Actinobacteria;o__Nakamurellales;f__Nakamurellaceae;g__Nakamurella	8.12e-05	3.37e-05	2.86e-05	3.71e-05	0.000192879	1.9e-05	1.59e-05	0.000156464	2.28e-05	0.0003178	0.00127505	0.00147786	0.00203739	0.0010589	0.00111823	0.00113543	0.000678253	0.000525662	0.000905287	0.000697588	0.00149196	0.00166428	0.00162284	0.00149352	0.00163513	0.00117957	0.00159362	0.000841524	0.000810084	0.00102502
k__Bacteria;p__Verrucomicrobia;c__Verrucomicrobiae;o__Verrucomicrobiales;f__Verrucomicrobiaceae;g__Roseimicrobium	0.00020771	2.21e-05	0.000155008	5.3e-05	0.000186717	5.15e-06	2.52e-05	0.00014562	8.96e-05	0.000516626	0.00111319	0.000821264	0.00133586	0.00122171	0.000992799	0.00124198	0.000986013	0.000757405	0.00113665	0.000855765	0.00111546	0.0015903	0.00121795	0.00113473	0.0013032	0.00129562	0.00124073	0.00136967	0.00153474	0.00126461
k__Bacteria;p__Proteobacteria;c__Betaproteobacteria;o__Burkholderiales;f__Burkholderiaceae;g__Caballeronia	0.000125322	3.1e-05	4.61e-05	4.69e-05	0.000210559	3.91e-05	3.25e-05	0.000204332	0.000123941	0.000364941	0.00110383	0.00104998	0.000950035	0.00122301	0.00119143	0.00103621	0.00141836	0.00108374	0.00128107	0.00119671	0.00123773	0.00112367	0.00110291	0.0012193	0.00125012	0.00112035	0.00086814	0.00123014	0.00130502	0.00135908
k__Bacteria;p__Proteobacteria;c__Betaproteobacteria;o__Rhodocyclales;f__Zoogloeaceae;g__Azoarcus	8.47e-05	1.59e-05	4.05e-05	3.63e-05	0.000144391	3.57e-05	2.12e-05	0.00015507	8.19e-05	0.000324214	0.00102873	0.000953648	0.000872385	0.00117427	0.00123141	0.00107309	0.00156219	0.00111267	0.00146778	0.00127729	0.00117716	0.00105564	0.00106571	0.00120925	0.00124136	0.00105755	0.000801852	0.00130392	0.00138438	0.00148759
k__Bacteria;p__Bacteroidetes;c__Cytophagia;o__Cytophagales;f__Hymenobacteraceae;g__Hymenobacter	9.34e-05	4.69e-05	5.41e-05	3.86e-05	0.000147338	8.74e-06	1.91e-05	0.00012641	6.15e-05	0.0003178	0.00107184	0.000890633	0.00100805	0.00111756	0.00116247	0.00116463	0.00138492	0.000906526	0.00129372	0.00110596	0.00115514	0.001108	0.0011017	0.00123862	0.00127528	0.00111592	0.00109967	0.00128621	0.00158353	0.00143174
k__Bacteria;p__Actinobacteria;c__Actinobacteria;o__Micrococcales;f__Microbacteriaceae;g__Cryobacterium	0.000113138	4.61e-05	2.38e-05	3.41e-05	0.000259314	2.01e-05	9.63e-06	0.000217345	1.78e-05	0.000681459	0.000768278	0.00075035	0.000824826	0.000731826	0.000554496	0.000958371	0.000569182	0.0105885	0.000580079	0.000609594	0.000582885	0.000703034	0.000663225	0.000550411	0.000532869	0.000468278	0.00101304	0.000444686	0.000528159	0.000549154
k__Bacteria;p__Proteobacteria;c__Betaproteobacteria;o__Burkholderiales;f__Comamonadaceae;g__Pelomonas	0.000110818	3.45e-05	5.01e-05	2.42e-05	0.000259047	7.84e-06	4.64e-05	0.000286902	0.000592081	0.000917163	0.000963528	0.000833627	0.000904134	0.00110619	0.00111095	0.000975506	0.00106558	0.00067179	0.00114791	0.000946091	0.00111868	0.00102352	0.00119195	0.00124138	0.00138858	0.00103912	0.0012308	0.00117591	0.00147607	0.00131215
k__Bacteria;p__Proteobacteria;c__Alphaproteobacteria;o__Rhodobacterales;f__Rhodobacteraceae;g__Rhodovulum	0.000104435	4.34e-05	4.53e-05	3.78e-05	0.00017627	1.32e-05	2.72e-05	0.000180011	9.97e-05	0.000330948	0.00129059	0.00134393	0.00102386	0.0012404	0.00122057	0.00101222	0.00104459	0.000773032	0.00103667	0.000900716	0.00143063	0.00132099	0.00120193	0.00139968	0.00135514	0.0012736	0.00117828	0.00105063	0.000892668	0.00114461
k__Bacteria;p__Proteobacteria;c__Betaproteobacteria;o__Burkholderiales;f__unclassified;g__Ideonella	7.95e-05	2.75e-05	3.5e-05	2.04e-05	0.000193146	6.05e-06	1.68e-05	0.000134931	8.14e-05	0.000418816	0.00108492	0.000839465	0.000984844	0.00109936	0.00117722	0.00100439	0.00104765	0.000601136	0.0011728	0.000895627	0.00123754	0.00121172	0.00132369	0.00136597	0.00154537	0.00116489	0.00118132	0.00111874	0.00165985	0.00140558
k__Bacteria;p__Proteobacteria;c__Betaproteobacteria;o__Burkholderiales;f__Oxalobacteraceae;g__Herbaspirillum	0.000134606	2.75e-05	4.69e-05	3.71e-05	0.000227704	7.54e-05	3.23e-05	0.000189306	0.000153244	0.000474295	0.00099657	0.0009327	0.000929124	0.00114193	0.00111486	0.00101744	0.00130426	0.00104301	0.00129075	0.00112908	0.00123925	0.00108103	0.0011265	0.00127884	0.00124509	0.00103127	0.000844763	0.0012002	0.00136064	0.00127105
k__Bacteria;p__Proteobacteria;c__Deltaproteobacteria;o__Myxococcales;f__Nannocystaceae;g__Nannocystis	0.00014795	2.66e-05	3.42e-05	1.21e-05	6.8e-05	4.17e-06	7.21e-06	7.93e-05	2.35e-05	0.000245966	0.00123794	0.00100052	0.000834261	0.00123504	0.00115661	0.00101353	0.00131498	0.000690243	0.00133817	0.00101903	0.00106229	0.00129323	0.00102988	0.00115247	0.00119202	0.00120585	0.00157328	0.00125863	0.00116548	0.00135513
k__Bacteria;p__Proteobacteria;c__Deltaproteobacteria;o__Desulfovibrionales;f__Desulfovibrionaceae;g__Desulfovibrio	4.47e-05	2.57e-05	3.9e-05	2.42e-05	9e-05	5.39e-06	1.36e-05	9.7e-05	4.52e-05	0.000227687	0.0010782	0.000972879	0.00086295	0.00121976	0.00124153	0.00104372	0.00158886	0.000989481	0.00138283	0.00126181	0.0011614	0.00105604	0.00102317	0.00118047	0.00115176	0.00112752	0.000804574	0.00119983	0.00125889	0.00140704
k__Bacteria;p__Actinobacteria;c__Actinobacteria;o__Pseudonocardiales;f__Pseudonocardiaceae;g__Actinophytocola	0.00017812	0.00152084	9.14e-05	0.000114261	0.000347717	9.11e-05	7.83e-05	0.00496269	7.83e-05	0.00174518	0.000653072	0.000697636	0.000487959	0.000584941	0.000732873	0.000913333	0.000544482	0.000524664	0.00040977	0.00188794	0.000602441	0.00117186	0.000971673	0.000473724	0.000374615	0.000649685	0.000631171	0.000621829	0.000749522	0.000350877
k__Bacteria;p__Proteobacteria;c__Betaproteobacteria;o__Burkholderiales;f__Oxalobacteraceae;g__Noviherbaspirillum	7.02e-05	3.37e-05	3.9e-05	2.19e-05	0.000160196	5.64e-06	1.68e-05	0.000139423	7.4e-05	0.000306897	0.00101495	0.0009236	0.000935627	0.00111789	0.00106866	0.00103915	0.00129006	0.00103719	0.00122022	0.00108836	0.00119937	0.00108499	0.00111548	0.00132536	0.00121539	0.00104799	0.000824909	0.00113189	0.00137678	0.00125921
k__Bacteria;p__Proteobacteria;c__Alphaproteobacteria;o__Rhodospirillales;f__unclassified;g__Enhydrobacter	0.000297061	5.49e-05	7.63e-05	6.13e-05	0.000441478	3.06e-05	2.09e-05	0.000492938	6.85e-05	0.000660614	0.00107043	0.000912954	0.000843186	0.000954266	0.000871098	0.00082603	0.000873445	0.00128357	0.00103687	0.000881421	0.00108868	0.00101439	0.00101628	0.00109786	0.00124948	0.00106557	0.000860454	0.00123708	0.00134052	0.00124011
k__Bacteria;p__Bacteroidetes;c__Cytophagia;o__Cytophagales;f__Cytophagaceae;g__Dyadobacter	0.000624872	0.000175379	3.97e-05	2.65e-05	0.00110664	4.3e-05	5.63e-05	0.000180321	0.000414577	0.000789851	0.000970949	0.000691627	0.000985099	0.000861	0.000828635	0.00112041	0.00103235	0.000704041	0.000980366	0.000816327	0.000870909	0.000852169	0.00156945	0.000875887	0.000957639	0.000761465	0.0010393	0.00104405	0.000996515	0.00113485
k__Bacteria;p__Actinobacteria;c__Actinobacteria;o__Propionibacteriales;f__Nocardioidaceae;g__Friedmanniella	7.77e-05	6.2e-06	1.51e-05	1.29e-05	8.01e-05	6.05e-06	4.7e-06	4.45e-05	7.93e-06	9.27e-05	0.00131074	0.00157041	0.00181146	0.00112195	0.000830412	0.00127299	0.000598471	0.000355761	0.000619792	0.000573125	0.0016934	0.00175253	0.00155568	0.00111837	0.00132592	0.00111455	0.00144247	0.000671685	0.000608654	0.000746392
k__Bacteria;p__Proteobacteria;c__Betaproteobacteria;o__Burkholderiales;f__unclassified;g__Piscinibacter	8.35e-05	2.04e-05	5.09e-05	1.51e-05	0.000141712	4.82e-06	1.59e-05	0.000126565	6.46e-05	0.000372317	0.000942678	0.000782287	0.000899161	0.0010321	0.00107222	0.000906643	0.000975303	0.000473794	0.00110345	0.00081039	0.00122064	0.00116829	0.00127082	0.0013226	0.00156404	0.00107547	0.00100504	0.000921878	0.00148063	0.00138627
k__Bacteria;p__Actinobacteria;c__Actinobacteria;o__Micromonosporales;f__Micromonosporaceae;g__Catelliglobosispora	3.42e-05	2.66e-05	1.75e-05	5.15e-05	7.1e-05	1.05e-05	1.68e-05	0.000165759	1.71e-05	0.000134368	0.00122875	0.00179569	0.000848414	0.00113836	0.00129785	0.001202	0.000999347	0.00134774	0.00105722	0.0007489	0.000981031	0.00121152	0.000951179	0.000907429	0.00070638	0.00139357	0.000902244	0.00160635	0.000675101	0.000700716
k__Bacteria;p__Actinobacteria;c__Actinobacteria;o__Micromonosporales;f__Micromonosporaceae;g__Dactylosporangium	0.000209451	3.01e-05	7.23e-05	6.96e-05	0.000277263	3.48e-05	9.76e-05	0.000973019	3.75e-05	0.000530736	0.000943738	0.00117686	0.00112752	0.00100122	0.000887976	0.00112204	0.000911478	0.000694732	0.00070712	0.000576093	0.000919135	0.00178247	0.001085	0.00103695	0.00108733	0.00130313	0.00146393	0.000842803	0.000434563	0.000779404
k__Eukaryota;p__Basidiomycota;c__Agaricomycetes;o__Polyporales;f__Gelatoporiaceae;g__Gelatoporia	0.00343128	0.00448722	0.00479015	0.00353529	0.00172948	0.000413383	0.000189843	0.000722522	0.000992005	0.00172722	3.18e-06	5.49e-06	2.24e-05	2.92e-06	2.13e-06	2.61e-06	8.74e-07	9.97e-07	1.78e-06	4.03e-06	3.99e-06	3.77e-06	1.24e-05	3.75e-06	1.14e-06	2.73e-06	1.6e-06	1.46e-06	4.18e-06	2.7e-06
k__Bacteria;p__Planctomycetes;c__Planctomycetia;o__Planctomycetales;f__Isosphaeraceae;g__Paludisphaera	7.02e-05	1.42e-05	1.75e-05	1.36e-05	0.000117067	2.61e-06	5.76e-06	6.61e-05	1.22e-05	0.000120257	0.00103421	0.00102903	0.00112472	0.00112195	0.00103135	0.0010943	0.00112153	0.00100145	0.00103213	0.0010591	0.00117849	0.00115916	0.00100353	0.00115878	0.00110258	0.00120278	0.000987745	0.00100132	0.00102746	0.00105907
k__Eukaryota;p__Ascomycota;c__Dothideomycetes;o__Pleosporales;f__Cucurbitariaceae;g__Pyrenochaeta	0.00294566	0.000132863	1.75e-05	7.95e-05	0.00141123	0.00486475	0.00171731	0.00380811	0.00352726	0.000649711	0.000131816	7.09e-05	9.22e-05	6.65e-05	5.76e-05	0.000164651	2.43e-05	1.45e-05	4.45e-05	1.38e-05	7.61e-05	0.000220132	0.000368382	0.000132083	0.000146567	0.000230897	0.000137858	6.28e-05	3.21e-05	8.57e-05
k__Bacteria;p__Acidobacteria;c__Solibacteres;o__Solibacterales;f__Bryobacteraceae;g__Bryobacter	1.51e-05	7.09e-06	2.86e-05	8.32e-06	7.05e-05	3.02e-06	5.39e-06	6.6e-05	1.27e-05	0.000263604	0.000907869	0.00077353	0.000823296	0.0010399	0.00101625	0.000918555	0.00125159	0.000908687	0.00123089	0.00102666	0.0011183	0.0010136	0.000957379	0.00108702	0.00111021	0.00101165	0.000816263	0.00105958	0.00147038	0.00129347
k__Bacteria;p__Actinobacteria;c__Rubrobacteria;o__Rubrobacterales;f__Rubrobacteraceae;g__Rubrobacter	4.24e-05	1.51e-05	2.23e-05	1.74e-05	4.98e-05	3.68e-06	4.02e-06	7.37e-05	8.41e-06	9.46e-05	0.001054	0.00115386	0.000818068	0.00107645	0.00101607	0.00109545	0.00101181	0.00102323	0.000888493	0.00134874	0.00120184	0.0011435	0.000963923	0.00102118	0.00105665	0.00113981	0.000937629	0.00102086	0.000875581	0.000920585
k__Bacteria;p__Bacteroidetes;c__Cytophagia;o__Cytophagales;f__Cytophagaceae;g__Spirosoma	0.000104435	4.87e-05	2.07e-05	2.42e-05	0.000183503	7.19e-06	2.6e-05	0.000110919	8.77e-05	0.00031299	0.000964942	0.000790529	0.000877485	0.000925506	0.000900057	0.000963267	0.00122886	0.000792483	0.00114099	0.000926372	0.000981031	0.000951526	0.000991479	0.000997127	0.00110924	0.000938605	0.000849727	0.00108971	0.00118997	0.00124032
k__Bacteria;p__Verrucomicrobia;c__Opitutae;o__Opitutales;f__Opitutaceae;g__Lacunisphaera	7.43e-05	5.23e-05	5.33e-05	2.5e-05	0.000150017	7.35e-06	9.63e-06	0.000134776	4.16e-05	0.000326459	0.000868995	0.000781428	0.000901838	0.000857101	0.000823483	0.000908927	0.000911915	0.00092714	0.000986095	0.00110363	0.000831228	0.000888263	0.00107897	0.00108998	0.00125499	0.000837918	0.000735085	0.000992188	0.00185387	0.00115146
k__Bacteria;p__Proteobacteria;c__Gammaproteobacteria;o__Vibrionales;f__Vibrionaceae;g__Photobacterium	0.0025987	0.00381582	0.00321066	0.00279221	0.000750351	4.71e-05	7.41e-05	0.000256539	0.000858697	0.0012029	0.000188359	0.000184068	0.000166266	0.000191731	0.000196677	0.000186355	0.000255957	0.000194671	0.000258625	0.000220302	0.000206193	0.000185823	0.000185827	0.000213698	0.000231619	0.000200861	0.000176926	0.000240514	0.00022611	0.000296481
k__Bacteria;p__Proteobacteria;c__Alphaproteobacteria;o__Rhizobiales;f__Aurantimonadaceae;g__Aureimonas	0.000467638	0.000433133	0.000426074	0.000302679	0.000361112	1.82e-05	3.95e-05	0.000319899	0.000275263	0.000494178	0.000926952	0.000919136	0.00072907	0.000851739	0.000832899	0.000889835	0.000779674	0.000808941	0.000765997	0.000805301	0.000847936	0.000848797	0.000901063	0.000907429	0.000803605	0.00086966	0.000832755	0.000829106	0.000721614	0.00079892
k__Bacteria;p__Proteobacteria;c__Betaproteobacteria;o__Burkholderiales;f__Burkholderiaceae;g__Ralstonia	0.000106176	2.48e-05	3.02e-05	2.5e-05	0.000154839	7.14e-05	5.64e-05	0.000189151	0.000115053	0.000295994	0.000796196	0.000753784	0.000749981	0.000948254	0.000964372	0.000865194	0.00113924	0.000891896	0.00107145	0.00125205	0.000929578	0.000833725	0.000835102	0.000991016	0.00100585	0.000853106	0.000675042	0.000932653	0.00114023	0.00106488
k__Bacteria;p__Proteobacteria;c__Betaproteobacteria;o__Burkholderiales;f__Oxalobacteraceae;g__Duganella	8.59e-05	4.07e-05	5.17e-05	2.57e-05	0.000269226	1.61e-05	3.62e-05	0.000184039	0.00205031	0.000431323	0.000690355	0.000670851	0.000804043	0.000812093	0.000881402	0.000759615	0.00101858	0.000663478	0.000882369	0.000732362	0.000853062	0.000768281	0.000817707	0.000927931	0.00094157	0.000773922	0.000682888	0.000913112	0.000985504	0.000977057
k__Bacteria;p__Proteobacteria;c__Alphaproteobacteria;o__Rhizobiales;f__Chelatococcaceae;g__Chelatococcus	0.0001758	4.61e-05	5.72e-05	5.22e-05	0.00037772	2.62e-05	3.88e-05	0.000520203	0.000144838	0.000364941	0.00103067	0.000954679	0.000797795	0.000923556	0.000915692	0.000860788	0.00082339	0.000837036	0.000770739	0.000793851	0.000970209	0.000958665	0.000905885	0.000993579	0.000953906	0.000960449	0.000862216	0.000930644	0.00077743	0.000864528
k__Eukaryota;p__Ascomycota;c__Leotiomycetes;o__Erysiphales;f__Erysiphaceae;g__Golovinomyces	0.00326535	0.00471752	0.00416535	0.00349821	0.000868489	5.58e-05	6.96e-05	0.00029062	0.00113444	0.00140589	1.94e-06	7.04e-06	1.5e-05	1.62e-06	3.73e-06	3.59e-06	1.53e-06	2.16e-06	1.38e-06	2.12e-06	3.8e-06	2.58e-06	1.69e-05	2.17e-06	2.76e-06	3.41e-06	3.51e-05	2.19e-06	3.61e-06	8.41e-05
k__Bacteria;p__Proteobacteria;c__Betaproteobacteria;o__Burkholderiales;f__Comamonadaceae;g__Limnohabitans	0.000130544	2.57e-05	2.31e-05	1.97e-05	0.000252082	9.23e-06	1.88e-05	0.000213627	0.000137392	0.000491933	0.000845141	0.000684072	0.000783897	0.00091462	0.000932037	0.000825867	0.00104525	0.000697391	0.00101692	0.000875908	0.000958057	0.000812704	0.000969262	0.0010263	0.00103652	0.000807883	0.000748695	0.000985613	0.00115978	0.00113256
k__Bacteria;p__Planctomycetes;c__Phycisphaerae;o__Phycisphaerales;f__Phycisphaeraceae;g__Phycisphaera	3.08e-05	1.24e-05	2.7e-05	1.29e-05	4.61e-05	3.27e-06	4.63e-06	4.43e-05	9.37e-06	0.000146874	0.00081581	0.000668618	0.000729835	0.000925831	0.000903611	0.000965388	0.00132612	0.000747597	0.00121034	0.0013286	0.00092692	0.000780378	0.000805996	0.00093562	0.00102662	0.000854984	0.000682087	0.00107236	0.00118181	0.0013269
k__Eukaryota;p__Chlorophyta;c__Mamiellophyceae;o__Mamiellales;f__Mamiellaceae;g__Micromonas	0.00274781	0.00433664	0.0040644	0.00340438	0.00100216	0.000243503	0.000135537	0.000526245	0.000954055	0.00122759	2.74e-05	2.58e-05	4.16e-05	2.44e-05	3.06e-05	2.66e-05	3.26e-05	2.16e-05	3.1e-05	3.35e-05	3.19e-05	2.56e-05	3.51e-05	2.66e-05	3.02e-05	2.32e-05	6.82e-05	3.12e-05	2.94e-05	0.000266168
k__Bacteria;p__Proteobacteria;c__Betaproteobacteria;o__Burkholderiales;f__Oxalobacteraceae;g__Janthinobacterium	0.000101534	2.75e-05	3.82e-05	2.95e-05	0.000208148	2.06e-05	3.09e-05	0.000169167	0.00019768	0.000364941	0.000850619	0.00074537	0.000799962	0.000914945	0.00091356	0.00080449	0.00106754	0.000818417	0.00101929	0.000892446	0.00094059	0.000848401	0.000899857	0.00102414	0.000955853	0.000819146	0.000746453	0.00100461	0.00114213	0.00105201
k__Bacteria;p__Proteobacteria;c__Alphaproteobacteria;o__Rhodospirillales;f__Rhodospirillaceae;g__Magnetospirillum	0.000111398	3.99e-05	5.25e-05	2.95e-05	0.000179216	9.4e-06	1.99e-05	0.000165914	8.17e-05	0.000305293	0.000908399	0.000775075	0.000722822	0.000903246	0.000900057	0.000793557	0.00100765	0.00138763	0.000994789	0.000949695	0.000873568	0.0008367	0.000798763	0.000935817	0.000928423	0.000878875	0.00072788	0.000960959	0.00101246	0.00107339
k__Bacteria;p__Actinobacteria;c__Actinobacteria;o__Pseudonocardiales;f__Pseudonocardiaceae;g__Lechevalieria	0.000186243	0.00022941	9.38e-05	0.000455532	0.00046023	0.000250285	6.82e-05	0.000720973	0.00335696	0.000625659	0.000574442	0.000801174	0.000652312	0.00069088	0.000790615	0.000728774	0.000449181	0.000464484	0.000550048	0.000798304	0.000474092	0.000617163	0.000731769	0.000488115	0.000773253	0.000957377	0.000866379	0.000552616	0.000508984	0.000440361
k__Bacteria;p__Actinobacteria;c__Actinobacteria;o__Streptosporangiales;f__Nocardiopsaceae;g__Nocardiopsis	0.000183342	6.82e-05	4.29e-05	6.66e-05	0.000728384	3.49e-05	2.75e-05	0.000357388	5.04e-05	0.000433568	0.000883661	0.0009679	0.00079907	0.000911695	0.000894194	0.000958861	0.000886778	0.000880924	0.000807883	0.00110808	0.000861986	0.000855144	0.000824252	0.000780077	0.000745335	0.000941335	0.000818504	0.000761536	0.00080249	0.000735181
k__Bacteria;p__Proteobacteria;c__Alphaproteobacteria;o__Rhizobiales;f__Hyphomicrobiaceae;g__Pelagibacterium	0.000150851	0.000131977	4.13e-05	6.51e-05	0.000422993	4.22e-05	2.94e-05	0.000461026	0.000166936	0.000853347	0.000897974	0.000921024	0.000904261	0.000871074	0.000791858	0.000921982	0.000681969	0.00101857	0.000704354	0.000898807	0.00073041	0.000771454	0.00078378	0.000795849	0.000743388	0.000782284	0.00106108	0.000958037	0.000809894	0.000775251
k__Bacteria;p__Proteobacteria;c__Betaproteobacteria;o__Burkholderiales;f__Comamonadaceae;g__Pseudorhodoferax	0.000400916	3.28e-05	3.34e-05	1.97e-05	0.00124407	0.00010116	6.85e-05	0.00281883	0.000673267	0.000710962	0.000511538	0.000465148	0.000711729	0.000529046	0.000564979	0.000653057	0.000502078	0.000341132	0.000553407	0.000417493	0.000691867	0.000634417	0.00122105	0.000629464	0.000728293	0.000501044	0.000761183	0.000722272	0.000638461	0.00112115
k__Bacteria;p__Proteobacteria;c__Deltaproteobacteria;o__Myxococcales;f__Archangiaceae;g__Hyalangium	1.62e-05	7.97e-06	2.62e-05	1.36e-05	3.75e-05	2.29e-06	8.57e-06	5.7e-05	1.78e-05	0.000128595	0.000792486	0.000612128	0.000617249	0.00138988	0.000768762	0.000673128	0.000958035	0.000629232	0.000976019	0.00111975	0.000780534	0.000878148	0.000939296	0.000858933	0.000941083	0.000940823	0.000815142	0.000995292	0.00170617	0.00121395
k__Bacteria;p__Bacteroidetes;c__Chitinophagia;o__Chitinophagales;f__Chitinophagaceae;g__Lacibacter	7.72e-05	7.09e-06	3.1e-05	2.8e-05	0.000116531	2.61e-06	1.19e-05	0.000113243	7.13e-05	0.000273546	0.000779233	0.000376549	0.000679853	0.000871887	0.000837341	0.00104567	0.0012647	0.000401146	0.0011977	0.000455235	0.000802938	0.000744879	0.000755535	0.000946857	0.00128291	0.00080208	0.000961647	0.00102597	0.00156549	0.00127665
k__Bacteria;p__Proteobacteria;c__Betaproteobacteria;o__Rhodocyclales;f__Zoogloeaceae;g__Thauera	4.99e-05	1.51e-05	3.58e-05	2.04e-05	0.000135819	3.29e-05	2.12e-05	0.000120833	8.72e-05	0.000284128	0.000798847	0.000751208	0.000679598	0.000912507	0.000895438	0.000779034	0.00112503	0.0008904	0.00113329	0.000930612	0.000935463	0.000804771	0.000831313	0.000927143	0.000944005	0.00080464	0.000619162	0.000993101	0.00108593	0.00110973
k__Bacteria;p__Proteobacteria;c__Gammaproteobacteria;o__Alteromonadales;f__Alteromonadaceae;g__Marinobacter	9.4e-05	2.92e-05	4.21e-05	4.24e-05	0.000212166	5.97e-05	6.42e-05	0.000184348	9.3e-05	0.000404065	0.00081846	0.000768379	0.000668888	0.00088521	0.000904854	0.000792741	0.00106492	0.000947089	0.00104399	0.00094291	0.000850594	0.000767289	0.000766041	0.000880421	0.000898071	0.000823754	0.000665115	0.000966621	0.00100202	0.00101401
k__Bacteria;p__Actinobacteria;c__Actinobacteria;o__Corynebacteriales;f__Gordoniaceae;g__Gordonia	0.000168257	5.49e-05	6.2e-05	4.69e-05	0.00036379	3.31e-05	2.46e-05	0.000352586	4.28e-05	0.000373279	0.000928365	0.000967728	0.000828906	0.000870262	0.000891529	0.000913659	0.000896177	0.000774196	0.000842458	0.000908349	0.000888947	0.000911466	0.000830968	0.000816745	0.000808799	0.000923417	0.000873263	0.000765736	0.000750092	0.000747638
k__Bacteria;p__Proteobacteria;c__Deltaproteobacteria;o__Myxococcales;f__Archangiaceae;g__Stigmatella	2.26e-05	1.51e-05	1.99e-05	1.06e-05	6.38e-05	4.17e-06	1.03e-05	8.19e-05	2.14e-05	0.000196901	0.00076015	0.000688708	0.00065499	0.000989037	0.000846757	0.000772017	0.00104241	0.000671457	0.00108844	0.00116003	0.000854771	0.000811316	0.000849568	0.000932466	0.000942057	0.000893552	0.00067232	0.000952924	0.0012587	0.00115665
k__Bacteria;p__Actinobacteria;c__Actinobacteria;o__Micromonosporales;f__Micromonosporaceae;g__Plantactinospora	6.27e-05	3.63e-05	4.69e-05	6.43e-05	0.000249403	2.34e-05	4.27e-05	0.000263045	5.07e-05	0.000398934	0.000836306	0.00111265	0.000700509	0.000910883	0.000941453	0.000879881	0.000891587	0.00150234	0.000762836	0.00072388	0.00092673	0.000957277	0.000902785	0.000748338	0.00064243	0.000928536	0.000853409	0.000784181	0.000475191	0.000706322
k__Bacteria;p__Chloroflexi;c__Ktedonobacteria;o__Ktedonobacterales;f__Ktedonobacteraceae;g__Ktedonobacter	2.73e-05	9.74e-06	2.54e-05	1.59e-05	6.91e-05	3.11e-06	7.43e-06	5.38e-05	8.65e-06	7.22e-05	0.000898857	0.000841697	0.000720655	0.00106248	0.00099955	0.00096033	0.00120284	0.00062707	0.00110721	0.00101352	0.00089768	0.00085792	0.000777063	0.000896192	0.000833795	0.000931267	0.000697938	0.000887728	0.000808375	0.00109
k__Bacteria;p__Proteobacteria;c__Gammaproteobacteria;o__Chromatiales;f__Ectothiorhodospiraceae;g__Thioalkalivibrio	7.54e-05	3.19e-05	4.85e-05	3.41e-05	0.000163411	6.62e-06	1.67e-05	0.000130438	5.36e-05	0.000365262	0.000837367	0.000788468	0.000626684	0.000867175	0.000881402	0.000789641	0.00114033	0.000964545	0.00109674	0.000958389	0.000845468	0.000736153	0.000754502	0.000866424	0.000830873	0.000814026	0.00063037	0.000956942	0.00100031	0.00103249
k__Bacteria;p__Proteobacteria;c__Gammaproteobacteria;o__Enterobacterales;f__Enterobacteriaceae;g__Citrobacter	8.47e-05	1.95e-05	2.7e-05	3.18e-05	0.000142248	5.56e-06	0.00120019	0.000173814	0.000998971	0.000567294	0.000758736	0.000475622	0.000612021	0.000673007	0.00066838	0.000671333	0.000917816	0.000358587	0.000866958	0.000658786	0.000647059	0.00073893	0.00074348	0.000771009	0.000969975	0.000736208	0.000677924	0.00104551	0.000940699	0.00113651
k__Bacteria;p__Actinobacteria;c__Actinobacteria;o__Propionibacteriales;f__Propionibacteriaceae;g__Microlunatus	0.000157233	7.09e-06	1.91e-05	9.08e-06	6.21e-05	8.42e-06	5.08e-06	4.26e-05	6.97e-06	0.00012154	0.000977487	0.00115557	0.00156065	0.000923231	0.000748686	0.00084398	0.000413334	0.000277128	0.000439209	0.00041092	0.00131064	0.00140785	0.001235	0.000936803	0.00118001	0.000778871	0.00129164	0.000512256	0.000497403	0.000641544
k__Archaea;p__Thaumarchaeota;c__Nitrososphaeria;o__Nitrososphaerales;f__Nitrososphaeraceae;g__Candidatus Nitrosocosmicus	8.7e-06	1.51e-05	1.91e-05	6.05e-06	9.38e-06	9.48e-06	2.35e-06	3.14e-05	2.4e-06	0.000246287	0.00100381	0.00133174	0.00102246	0.000761073	0.000624142	0.00111992	0.000559127	0.000479779	0.000758094	0.00063101	0.000927299	0.00098524	0.000908124	0.0009439	0.000944654	0.000988266	0.00109742	0.000644475	0.000949243	0.000765078
k__Bacteria;p__Bacteroidetes;c__Cytophagia;o__Cytophagales;f__Cyclobacteriaceae;g__Algoriphagus	6.38e-05	2.39e-05	2.15e-05	1.14e-05	0.000107958	3.84e-06	1.3e-05	7.67e-05	5.09e-05	0.00021005	0.000893733	0.000643721	0.000758141	0.000919169	0.000749574	0.000899136	0.00100394	0.000754247	0.001026	0.000780917	0.000819646	0.000735955	0.000769141	0.000813788	0.000970137	0.000754638	0.000710908	0.000909277	0.00121902	0.00103581
k__Bacteria;p__Proteobacteria;c__Alphaproteobacteria;o__Rhizobiales;f__Phyllobacteriaceae;g__Pseudaminobacter	0.000110237	9.92e-05	7.95e-05	2.57e-05	0.000328429	5.04e-05	1.71e-05	0.000421678	8.21e-05	0.000698134	0.000863871	0.0011882	0.0010477	0.000799419	0.000757569	0.00108272	0.000640439	0.000836704	0.000708898	0.000754837	0.000700031	0.000727824	0.000711791	0.000699054	0.00070914	0.000726821	0.000978619	0.000620186	0.00062669	0.000612478
k__Bacteria;p__Cyanobacteria;c__unclassified;o__Nostocales;f__Tolypothrichaceae;g__Hassallia	0.000114299	6.38e-05	2.46e-05	2.72e-05	0.000325215	5.88e-06	2.2e-05	7.22e-05	3.84e-05	0.000609946	0.000754319	0.000556839	0.000667613	0.000564468	0.000607796	0.000782461	0.000952571	0.00110635	0.000922081	0.000744659	0.000674399	0.000628269	0.000853185	0.000716599	0.000925501	0.000632449	0.000590341	0.00117682	0.00139463	0.00112862
k__Bacteria;p__Bacteroidetes;c__Cytophagia;o__Cytophagales;f__Hymenobacteraceae;g__Pontibacter	5.22e-05	1.59e-05	3.02e-05	2.42e-05	0.000100725	5.72e-06	1.26e-05	7.36e-05	4.32e-05	0.000212936	0.000826235	0.000664841	0.000844206	0.000729714	0.000738914	0.000974853	0.00083716	0.000732136	0.000845422	0.000730029	0.00085648	0.000772842	0.000812885	0.000856962	0.000933779	0.000756857	0.000940511	0.000894302	0.00123534	0.000992421
k__Bacteria;p__Actinobacteria;c__Actinobacteria;o__Pseudonocardiales;f__Pseudonocardiaceae;g__Prauserella	0.000224536	0.000205494	0.000104929	0.000316299	0.000371291	0.000228713	9.43e-05	0.00342934	7.73e-05	0.000637525	0.000602713	0.000687162	0.000520473	0.000610288	0.000580436	0.000667743	0.000582952	0.000586175	0.000541947	0.00090432	0.000555924	0.000659603	0.000597781	0.000529317	0.000459342	0.000611117	0.000544869	0.000502212	0.000552459	0.000469428
k__Bacteria;p__Firmicutes;c__Clostridia;o__Clostridiales;f__Clostridiaceae;g__Clostridium	0.000182182	0.000222324	0.000194754	0.000144529	0.000106083	9.23e-06	1.19e-05	7.71e-05	0.000114813	0.000211332	0.000810155	0.000766834	0.000615081	0.0008649	0.000860615	0.000814281	0.00101618	0.000675946	0.00092702	0.000876544	0.000865214	0.000770462	0.000730563	0.000787372	0.000773253	0.000816757	0.000623165	0.00080153	0.000801161	0.000956711
k__Bacteria;p__Proteobacteria;c__Deltaproteobacteria;o__Desulfuromonadales;f__Desulfuromonadaceae;g__Desulfuromonas	3.37e-05	1.86e-05	2.38e-05	1.21e-05	4.9e-05	2.7e-06	8.65e-06	5.53e-05	1.99e-05	0.000137254	0.000804854	0.00068493	0.000601821	0.000906821	0.000949448	0.000773322	0.00119672	0.000723159	0.00106631	0.000939306	0.000844518	0.00077304	0.000739002	0.000846907	0.00087697	0.000811637	0.000581695	0.000910373	0.000942218	0.00107962
k__Bacteria;p__Acidobacteria;c__Acidobacteriia;o__Acidobacteriales;f__Acidobacteriaceae;g__Granulicella	4e-05	8.86e-06	1.99e-05	1.36e-05	7.8e-05	2.61e-06	1.03e-05	7.78e-05	2.91e-05	0.000165795	0.000808035	0.000706222	0.000635099	0.000893009	0.000871808	0.000772506	0.00111257	0.000715678	0.000972463	0.000959661	0.000915338	0.000811514	0.00079308	0.000851047	0.000869991	0.00085925	0.000646702	0.000834585	0.000925891	0.00099948
k__Eukaryota;p__Chlorophyta;c__Chlorophyceae;o__Chlamydomonadales;f__Chlamydomonadaceae;g__Chlamydomonas	0.00250181	0.0036741	0.00339031	0.00299879	0.00100511	0.00022381	0.000108763	0.000477757	0.000915383	0.00112272	3.09e-05	2.85e-05	3.99e-05	3.36e-05	3.02e-05	3.38e-05	3.67e-05	2.34e-05	3.36e-05	3.33e-05	3.87e-05	3.61e-05	4.62e-05	3.39e-05	3.08e-05	3.12e-05	8.82e-05	3.47e-05	3.25e-05	9.28e-05
k__Bacteria;p__Planctomycetes;c__Planctomycetia;o__Planctomycetales;f__Planctomycetaceae;g__Planctomicrobium	2.67e-05	1.86e-05	2.7e-05	2.19e-05	0.000149749	5.07e-06	9.71e-06	7.33e-05	2.59e-05	0.000262321	0.000928542	0.000880159	0.000763496	0.000809005	0.000827569	0.000815423	0.000847652	0.00085366	0.000821318	0.000858309	0.000852872	0.000836502	0.000778096	0.000821082	0.000829088	0.000840307	0.000788243	0.000775963	0.00081464	0.000830063
k__Bacteria;p__Proteobacteria;c__Alphaproteobacteria;o__Rhizobiales;f__Phyllobacteriaceae;g__Nitratireductor	0.000129964	6.82e-05	6.76e-05	3.71e-05	0.000301909	2.66e-05	2.66e-05	0.000409439	0.000101843	0.000451526	0.000872883	0.000929438	0.000761584	0.000764647	0.000795234	0.000849855	0.000705357	0.000850834	0.000694673	0.000822475	0.000780344	0.000769669	0.000669597	0.000742818	0.000730078	0.000800033	0.000783439	0.000711314	0.000684594	0.000707567
k__Bacteria;p__Actinobacteria;c__Actinobacteria;o__Frankiales;f__Sporichthyaceae;g__Sporichthya	6.15e-05	7.09e-05	2.7e-05	1.51e-05	0.000121353	1.23e-05	6.07e-06	0.000144845	2.64e-05	0.00050444	0.000817223	0.0010292	0.000876848	0.000709403	0.000663406	0.00130367	0.000944046	0.00102256	0.0010675	0.000893294	0.000702499	0.000798028	0.000675797	0.000678157	0.000643728	0.000875462	0.000534462	0.000718802	0.000618716	0.000477317
k__Bacteria;p__Actinobacteria;c__Actinobacteria;o__Geodermatophilales;f__Geodermatophilaceae;g__Modestobacter	5.51e-05	2.04e-05	3.02e-05	2.42e-05	0.000129121	1.47e-05	1.17e-05	0.000116341	2.11e-05	0.000225763	0.000974483	0.000996403	0.000969161	0.000752461	0.000769295	0.000886408	0.000556941	0.000689578	0.000508755	0.000488524	0.00108489	0.00109015	0.00101972	0.000887518	0.000894337	0.000897818	0.00122055	0.000604298	0.000422603	0.000581957
k__Bacteria;p__Proteobacteria;c__Alphaproteobacteria;o__Rhizobiales;f__Bradyrhizobiaceae;g__Tardiphaga	0.00020597	3.99e-05	7.23e-05	0.000226252	0.00054515	1.48e-05	5.23e-05	0.000316491	0.000170058	0.000333514	0.000419302	0.000446261	0.000434535	0.000463403	0.000445765	0.000384295	0.000357378	0.000432732	0.000363933	0.00040986	0.000454536	0.000472193	0.000533886	0.000482595	0.000449441	0.000498314	0.000419499	0.0064873	0.000365838	0.000558912
k__Bacteria;p__Planctomycetes;c__Planctomycetia;o__Planctomycetales;f__Planctomycetaceae;g__Gimesia	1.74e-05	1.24e-05	2.62e-05	1.29e-05	7.69e-05	3.84e-06	3.34e-06	5.34e-05	9.85e-06	0.000178622	0.000890552	0.000851312	0.000699489	0.000812905	0.000832722	0.000797147	0.000881751	0.000965542	0.000809068	0.000917678	0.000846227	0.00077542	0.000735213	0.000825025	0.000813019	0.000817951	0.000752377	0.000744004	0.000841788	0.000809716
k__Bacteria;p__Proteobacteria;c__Alphaproteobacteria;o__Rhodospirillales;f__Acetobacteraceae;g__Belnapia	0.000268631	1.15e-05	2.07e-05	1.44e-05	0.000371291	5.97e-06	1.42e-05	0.000152436	4.85e-05	0.00011673	0.000722514	0.000792589	0.000759799	0.000716877	0.000711553	0.000741828	0.000589291	0.000523168	0.00058976	0.000507819	0.000934514	0.000963226	0.000966334	0.00102059	0.00101494	0.000875804	0.000904966	0.000810113	0.000647383	0.000779819
k__Bacteria;p__Proteobacteria;c__Alphaproteobacteria;o__Sphingomonadales;f__Erythrobacteraceae;g__Porphyrobacter	8.88e-05	6.29e-05	3.26e-05	1.44e-05	0.000256368	2.97e-05	1.3e-05	0.000267847	7.83e-05	0.000531698	0.000572675	0.000511165	0.000745263	0.000442768	0.000448074	0.000580604	0.000428635	0.000779682	0.000505001	0.000440392	0.000649717	0.000538034	0.000495481	0.00444331	0.000558028	0.000450872	0.000849567	0.000531614	0.000640929	0.000564933
k__Bacteria;p__Proteobacteria;c__Alphaproteobacteria;o__Rhizobiales;f__Rhodobiaceae;g__Afifella	3.77e-05	8.86e-06	3.26e-05	2.42e-05	7.5e-05	3.84e-06	9.25e-06	9.87e-05	4.04e-05	0.000168681	0.000921121	0.000957941	0.000637777	0.000807381	0.000891174	0.000947438	0.000865139	0.000587172	0.000748018	0.000988709	0.000822684	0.000704423	0.00063963	0.000699054	0.000678138	0.000907034	0.000765186	0.000860882	0.000687631	0.000817813
k__Bacteria;p__Deinococcus-Thermus;c__Deinococci;o__Thermales;f__Thermaceae;g__Meiothermus	2.2e-05	1.59e-05	2.15e-05	1.29e-05	4.88e-05	2.12e-06	6.22e-06	4.9e-05	1.37e-05	0.000105185	0.000763331	0.000710343	0.000607431	0.000856288	0.0008679	0.000804164	0.00109246	0.000695895	0.000980761	0.00094185	0.000762497	0.000729411	0.000685614	0.000782837	0.000750692	0.000826484	0.000621884	0.000830384	0.000853179	0.00095152
k__Bacteria;p__Actinobacteria;c__Actinobacteria;o__Streptosporangiales;f__Streptosporangiaceae;g__Microbispora	0.000255286	5.49e-05	4.29e-05	5.37e-05	0.00195665	3.38e-05	2.86e-05	0.000359712	4.73e-05	0.000351793	0.000646181	0.000759965	0.000579635	0.000740437	0.000653101	0.000726815	0.00070186	0.000784004	0.00058324	0.000825444	0.000628642	0.000646712	0.000842852	0.000585305	0.000523617	0.000703612	0.000589061	0.000586218	0.000534993	0.000503477
k__Bacteria;p__Proteobacteria;c__Alphaproteobacteria;o__Rhodospirillales;f__Acetobacteraceae;g__Stella	4.82e-05	1.59e-05	2.46e-05	2.35e-05	0.000128318	6.78e-06	1.46e-05	0.000120214	5.72e-05	0.000297276	0.000726754	0.000714635	0.000598378	0.000750349	0.000750285	0.000677208	0.000866887	0.00128772	0.000801363	0.000815478	0.000775218	0.000649687	0.000696119	0.000781852	0.000790783	0.000746617	0.00061596	0.000790755	0.000875961	0.000871794
k__Bacteria;p__Proteobacteria;c__Gammaproteobacteria;o__Nevskiales;f__Sinobacteraceae;g__Nevskia	0.000105016	2.75e-05	5.25e-05	3.25e-05	0.000210827	6.62e-06	3.05e-05	0.0001718	8.05e-05	0.000433247	0.000629924	0.000580019	0.000522258	0.000721102	0.00079932	0.000621889	0.0010964	0.000812432	0.00109911	0.000587967	0.000689209	0.000647704	0.000640492	0.000723302	0.000750367	0.000735696	0.000528217	0.00103291	0.000988162	0.000952558
k__Bacteria;p__Actinobacteria;c__Actinobacteria;o__Micrococcales;f__Microbacteriaceae;g__Leifsonia	0.000121261	3.45e-05	1.59e-05	2.04e-05	0.000364326	1.52e-05	8.04e-06	0.000234231	1.92e-05	0.00064939	0.000844788	0.00085406	0.000964316	0.000850114	0.000668025	0.000952171	0.000619455	0.00119463	0.000639944	0.000556374	0.000595795	0.000785138	0.000742447	0.000628478	0.000652168	0.000589956	0.000892797	0.000545493	0.000525501	0.000618499
k__Bacteria;p__Bacteroidetes;c__Chitinophagia;o__Chitinophagales;f__Chitinophagaceae;g__Niabella	0.000106756	3.45e-05	4.69e-05	4.16e-05	0.000290389	5.07e-06	2.07e-05	0.000255919	0.000102083	0.000418175	0.000710322	0.000444715	0.000595573	0.00066862	0.000669802	0.000675902	0.000856833	0.000384687	0.000864982	0.000547469	0.000708575	0.000696292	0.000772585	0.000807085	0.000991887	0.000756345	0.000685609	0.000929	0.000961393	0.00114564
k__Bacteria;p__Acidobacteria;c__Acidobacteriia;o__Acidobacteriales;f__Acidobacteriaceae;g__Edaphobacter	3.08e-05	1.77e-06	1.67e-05	1.44e-05	5.09e-05	2.53e-06	8.8e-06	5.07e-05	1.99e-05	0.000109354	0.000731702	0.00066776	0.000586775	0.000871074	0.000784396	0.000706581	0.00110711	0.000606124	0.000995579	0.000838378	0.000888187	0.000776412	0.000716269	0.000830151	0.000816752	0.000793206	0.000554316	0.000775598	0.000798503	0.000953804
k__Eukaryota;p__Ascomycota;c__Sordariomycetes;o__Hypocreales;f__Nectriaceae;g__Fusarium	0.000957324	0.000162978	0.000131956	0.000209605	0.00150499	0.0040795	0.00303825	0.00257763	0.000710257	0.000219029	9.72e-05	0.000122426	0.00021357	9.55e-05	8.05e-05	0.000147354	0.00010317	7.78e-05	8.85e-05	6.83e-05	9.97e-05	0.0001178	0.000184277	0.000119663	0.000128875	0.000147958	0.000150187	0.000109573	0.000129477	0.000143465
k__Bacteria;p__Actinobacteria;c__Acidimicrobiia;o__Acidimicrobiales;f__Microthrixaceae;g__Candidatus Microthrix	2.44e-05	1.77e-05	1.67e-05	2.95e-05	7.55e-05	6.54e-06	2.06e-05	6.82e-05	7.45e-06	0.000118654	0.000876063	0.000991767	0.000761201	0.000754086	0.000814067	0.000811344	0.000731805	0.000752751	0.000732805	0.000882057	0.000754712	0.000820636	0.000734008	0.000755238	0.000692746	0.000842526	0.000791445	0.000680999	0.000749142	0.000701131
k__Eukaryota;p__Chlorophyta;c__Trebouxiophyceae;o__Chlorellales;f__Chlorellaceae;g__Chlorella	0.00233355	0.00361564	0.00331082	0.0027627	0.000676414	0.000111701	7.42e-05	0.000347009	0.000840442	0.00101369	3.2e-05	2.92e-05	4.46e-05	3.72e-05	4.16e-05	3.69e-05	4.37e-05	2.31e-05	3.99e-05	3.63e-05	4.33e-05	4.18e-05	4.43e-05	4e-05	4.45e-05	3.72e-05	5.14e-05	4.24e-05	4.67e-05	9.47e-05
k__Bacteria;p__Chloroflexi;c__Chloroflexia;o__Chloroflexales;f__Roseiflexaceae;g__Roseiflexus	9.86e-06	6.2e-06	1.27e-05	9.08e-06	2.87e-05	1.72e-06	6.6e-06	3.39e-05	5.28e-06	5.68e-05	0.000732409	0.000737644	0.000677941	0.000912507	0.000986581	0.00084855	0.00097574	0.000404969	0.000950334	0.000638855	0.000750535	0.000772247	0.000765869	0.000829165	0.000804092	0.00085925	0.000715391	0.000689582	0.000609793	0.00104184
k__Bacteria;p__Firmicutes;c__Bacilli;o__Lactobacillales;f__Aerococcaceae;g__Aerococcus	0.00172086	0.00271749	0.00291177	0.00264314	0.000873311	0.000200931	0.000102696	0.000431282	0.000728752	0.00106468	0.000117857	0.000118648	0.000114626	0.000127875	0.000131828	8.93e-05	0.000141203	0.000122521	0.000136129	0.00011365	0.000123222	0.000110264	0.000115044	0.000130111	0.000131959	0.000122019	9.46e-05	0.000125462	0.000127388	0.000136614
k__Bacteria;p__Proteobacteria;c__Deltaproteobacteria;o__Myxococcales;f__Archangiaceae;g__Cystobacter	3.71e-05	7.09e-06	2.86e-05	2.35e-05	8.79e-05	5.56e-06	1.34e-05	9.33e-05	2.88e-05	0.000189526	0.000673392	0.000596846	0.000606156	0.000771634	0.000728965	0.000658279	0.000881969	0.000598643	0.000869921	0.000861065	0.00074351	0.000742301	0.000707141	0.000781457	0.000796139	0.000756345	0.00064494	0.000819244	0.00101816	0.00101796
k__Bacteria;p__Proteobacteria;c__Oligoflexia;o__Bdellovibrionales;f__Bdellovibrionaceae;g__Bdellovibrio	3.37e-05	7.09e-06	1.11e-05	9.84e-06	0.000101261	5.8e-06	7.51e-06	8.37e-05	6.15e-05	0.00026649	0.000657312	0.000561303	0.000745773	0.000684868	0.000623253	0.000790457	0.000794319	0.00102705	0.000775283	0.000810814	0.000748637	0.000743689	0.000820118	0.000865044	0.000844832	0.00066658	0.000609715	0.000725194	0.000876341	0.000770684
k__Bacteria;p__Chloroflexi;c__Thermoflexia;o__Thermoflexales;f__Thermoflexaceae;g__Thermoflexus	5.22e-06	4.43e-06	1.43e-05	7.57e-06	2.57e-05	3.11e-06	1.82e-06	1.75e-05	3.12e-06	8.79e-05	0.000811215	0.000757046	0.000646192	0.000807381	0.000779777	0.000692221	0.000772461	0.000899377	0.000776073	0.000658362	0.000760598	0.000736352	0.000677519	0.000822857	0.000821135	0.000737231	0.000650384	0.000748022	0.000996515	0.000992837
k__Bacteria;p__Actinobacteria;c__Actinobacteria;o__Propionibacteriales;f__Nocardioidaceae;g__Actinopolymorpha	0.000351599	3.37e-05	2.7e-05	4.16e-05	0.000314499	1.71e-05	1.84e-05	0.000182799	2.76e-05	0.000237629	0.000693889	0.000790529	0.000634717	0.000746449	0.000712086	0.000836637	0.000744046	0.000753914	0.000625521	0.00120922	0.000699651	0.000696688	0.000618619	0.00061665	0.000571824	0.000777165	0.000601549	0.000643927	0.000839131	0.000584034
k__Bacteria;p__Firmicutes;c__Bacilli;o__Lactobacillales;f__Streptococcaceae;g__Streptococcus	0.00178585	0.0023871	0.00246583	0.0023276	0.000796963	0.000377103	0.000376652	0.000435465	0.000783996	0.000917805	0.000142241	0.000144575	0.000133752	0.000141686	0.000152438	0.000156329	0.000155847	0.000144632	0.00016458	0.000162629	0.000143158	0.000134657	0.000138983	0.000138194	0.000149651	0.000139255	0.00012553	0.000148472	0.000159852	0.00014824
k__Bacteria;p__Proteobacteria;c__Alphaproteobacteria;o__Rhizobiales;f__Methylocystaceae;g__Methylocystis	0.000107336	3.01e-05	3.26e-05	4.62e-05	0.000137426	5.72e-06	1.81e-05	0.000171491	8.84e-05	0.000262321	0.000771989	0.000760309	0.000614954	0.00076806	0.000794523	0.000673618	0.000784701	0.000662979	0.000755921	0.000709462	0.000793445	0.000735558	0.000688886	0.000766278	0.000760106	0.000757539	0.00064398	0.000761536	0.000679848	0.000795183
k__Bacteria;p__Actinobacteria;c__Actinobacteria;o__Pseudonocardiales;f__Pseudonocardiaceae;g__Saccharopolyspora	0.000165356	0.000116919	0.000100159	0.000123342	0.000390043	9.42e-05	4.41e-05	0.000740182	8e-05	0.000777665	0.000628157	0.000768035	0.000534753	0.000664233	0.000662162	0.000699401	0.000649182	0.000643695	0.000596083	0.000898807	0.000648388	0.000677253	0.000645486	0.000581165	0.000520696	0.000702588	0.000604592	0.000557364	0.000586252	0.000543756
k__Bacteria;p__Proteobacteria;c__Alphaproteobacteria;o__Rhodospirillales;f__unclassified;g__Reyranella	0.000390472	4.43e-05	5.48e-05	2.8e-05	0.000665699	5.93e-05	2.14e-05	0.00118417	4.64e-05	0.000857515	0.000661376	0.000561475	0.000577595	0.00051361	0.000478633	0.000477472	0.000451804	0.000843686	0.000582253	0.000426822	0.000591808	0.000549339	0.000609319	0.000629661	0.000714334	0.000656682	0.000575451	0.000687756	0.000773633	0.000676632
k__Bacteria;p__Planctomycetes;c__Planctomycetia;o__Planctomycetales;f__Planctomycetaceae;g__Fuerstia	1.45e-05	1.51e-05	2.07e-05	1.29e-05	4.77e-05	2.53e-06	3.49e-06	4.86e-05	8.17e-06	0.000133726	0.000778703	0.000754471	0.00064224	0.000751324	0.000724878	0.00073628	0.000853773	0.000774861	0.000800178	0.000823748	0.000790027	0.000742499	0.000674419	0.00073513	0.000715632	0.0007758	0.00065903	0.000713506	0.00081502	0.000774836
k__Bacteria;p__Actinobacteria;c__Actinobacteria;o__Pseudonocardiales;f__Pseudonocardiaceae;g__Alloactinosynnema	0.000109657	0.000224095	4.61e-05	8.1e-05	0.000171448	4.87e-05	3.73e-05	0.00100245	8.12e-05	0.00042523	0.00056278	0.000676517	0.000462203	0.000797144	0.000843382	0.000938137	0.000626231	0.000811102	0.000468845	0.00102878	0.000524596	0.00076015	0.000764319	0.000444745	0.000401234	0.000704124	0.00057385	0.000627308	0.00065194	0.00042043
k__Bacteria;p__Verrucomicrobia;c__Verrucomicrobiae;o__Verrucomicrobiales;f__Verrucomicrobiaceae;g__Haloferula	1.74e-05	1.68e-05	1.83e-05	9.84e-06	0.000154839	3.27e-06	5.99e-06	4.68e-05	7.69e-06	0.000172209	0.000746721	0.000489187	0.00108417	0.000902271	0.000741401	0.00110605	0.000900767	0.000408294	0.000797609	0.00062062	0.000621807	0.000526929	0.000719713	0.000677368	0.000717418	0.00052323	0.000604912	0.0011339	0.000832866	0.000639676
k__Bacteria;p__Chloroflexi;c__Thermomicrobia;o__Sphaerobacterales;f__Sphaerobacteraceae;g__Sphaerobacter	2.32e-05	1.59e-05	1.27e-05	8.32e-06	9.27e-05	2.53e-06	1.82e-06	5e-05	9.61e-07	6.96e-05	0.000738593	0.000820062	0.000661238	0.000824604	0.000816554	0.000848386	0.000840876	0.000842356	0.000790694	0.000844527	0.000719777	0.000699663	0.000611558	0.000671848	0.000592275	0.000743034	0.000642859	0.000663102	0.000695795	0.000789577
k__Bacteria;p__Proteobacteria;c__Gammaproteobacteria;o__Methylococcales;f__Methylococcaceae;g__Methylocaldum	2.84e-05	1.42e-05	2.31e-05	1.44e-05	9.59e-05	4.09e-06	1.27e-05	8.5e-05	3.7e-05	0.000193053	0.000746191	0.000642004	0.000569817	0.000832566	0.000776224	0.000678024	0.000995412	0.000639539	0.000901731	0.000781129	0.000724714	0.000667337	0.000630503	0.000686437	0.000680573	0.000788769	0.000564083	0.000739621	0.000731297	0.000839821
k__Bacteria;p__Actinobacteria;c__Actinobacteria;o__Frankiales;f__Cryptosporangiaceae;g__Cryptosporangium	8.12e-05	4.34e-05	4.53e-05	4.99e-05	0.000296283	3.49e-05	3.69e-05	0.000259637	4.61e-05	0.000420099	0.000683464	0.000795508	0.000828396	0.000682593	0.000650436	0.000691242	0.000591914	0.000539626	0.000567632	0.000748688	0.000638135	0.000772445	0.000963923	0.00059319	0.000577018	0.000800715	0.000978619	0.000638631	0.000478608	0.000549361
k__Bacteria;p__Proteobacteria;c__Betaproteobacteria;o__Burkholderiales;f__Comamonadaceae;g__Caenimonas	0.000105596	7.97e-06	1.59e-06	6.05e-06	0.000263065	5.56e-06	1.24e-05	0.000163745	2.26e-05	0.000774137	0.000609958	0.000384619	0.000562422	0.000578929	0.000805361	0.000564938	0.000887652	0.000451684	0.00100961	0.00117911	0.000550987	0.00051503	0.000701286	0.000613298	0.000658823	0.000529885	0.000527737	0.000690495	0.000957786	0.000877192
k__Eukaryota;p__Ascomycota;c__Eurotiomycetes;o__Chaetothyriales;f__Herpotrichiellaceae;g__Exophiala	0.00192103	0.000896381	4.29e-05	6.2e-05	0.00238312	0.00445823	0.000186658	0.00182474	0.000142436	0.00131706	4.79e-05	0.000146636	0.000141912	5.69e-05	8.31e-05	0.000119123	4.94e-05	4.6e-05	7.29e-05	0.000121495	7.75e-05	6.98e-05	9.37e-05	7.06e-05	7.68e-05	8.46e-05	7.16e-05	0.000146281	3.83e-05	6e-05
k__Bacteria;p__Bacteroidetes;c__Cytophagia;o__Cytophagales;f__Cytophagaceae;g__Flectobacillus	0.00226799	0.0030709	0.00262004	0.00215961	0.000580511	2.37e-05	3.6e-05	0.000207431	0.000684556	0.00095757	9.98e-05	8.64e-05	0.000103661	0.00010009	0.000101447	0.000111454	0.000112787	8.43e-05	0.000130004	0.000104956	0.000106324	0.000109669	0.000105055	0.000112369	0.000136666	0.000100857	0.000115923	0.000132219	0.000143146	0.00018665
k__Bacteria;p__Actinobacteria;c__Nitriliruptoria;o__Euzebyales;f__Euzebyaceae;g__Euzebya	1.86e-05	1.33e-05	1.03e-05	3.78e-06	3.38e-05	3.02e-06	6.9e-06	3.5e-05	2.16e-06	6.67e-05	0.000788775	0.000860241	0.000606538	0.000761398	0.000802696	0.000918718	0.00082186	0.000751919	0.000690524	0.00101903	0.000723195	0.000731989	0.000603981	0.00060975	0.000560949	0.0007758	0.000595305	0.000642466	0.000741359	0.00056431
k__Bacteria;p__Proteobacteria;c__Alphaproteobacteria;o__Rhizobiales;f__Phyllobacteriaceae;g__Hoeflea	9.92e-05	5.76e-05	5.56e-05	3.1e-05	0.00025101	2.06e-05	2.37e-05	0.000548863	0.000107848	0.000388672	0.000693889	0.000748633	0.000634717	0.000651396	0.000679218	0.000700543	0.000615739	0.00067844	0.000612877	0.000653273	0.000639654	0.000639771	0.00063963	0.000664554	0.000639508	0.0007031	0.000670238	0.000629682	0.000600491	0.000610194
k__Bacteria;p__Actinobacteria;c__Actinobacteria;o__Pseudonocardiales;f__Pseudonocardiaceae;g__Actinokineospora	0.000163615	0.000282555	8.35e-05	0.000111234	0.000225829	8.26e-05	5.89e-05	0.00109742	0.000106647	0.000701662	0.000591228	0.00066278	0.000492549	0.000605089	0.000576172	0.000739707	0.00057399	0.000453845	0.000445729	0.000869335	0.000558012	0.000885684	0.000799107	0.000503295	0.00041146	0.000575962	0.000625887	0.000483219	0.000490189	0.000402782
k__Bacteria;p__Cyanobacteria;c__unclassified;o__Synechococcales;f__Synechococcaceae;g__Synechococcus	0.0001758	0.000224981	0.000226551	0.000210362	0.000102601	1.01e-05	1.35e-05	7.64e-05	6.15e-05	0.000165474	0.000614198	0.000582594	0.000516903	0.000721264	0.000694497	0.000639349	0.00089421	0.000560074	0.000789904	0.000752081	0.000689019	0.000626286	0.000608975	0.000697082	0.000646812	0.000660948	0.000524534	0.000671138	0.000699782	0.000791446
k__Bacteria;p__Actinobacteria;c__Actinobacteria;o__Streptomycetales;f__Streptomycetaceae;g__Streptacidiphilus	0.000143889	2.39e-05	2.15e-05	2.8e-05	0.000739368	2.46e-05	2.43e-05	0.000237019	3.8e-05	0.0002992	0.000677279	0.000763915	0.000551966	0.00068633	0.000671934	0.000685204	0.000708198	0.000590331	0.000591143	0.000833077	0.00065997	0.000670312	0.000616725	0.000592993	0.000574421	0.000698322	0.000591142	0.000558277	0.000587771	0.000563687
k__Bacteria;p__Actinobacteria;c__Actinobacteria;o__Micrococcales;f__Intrasporangiaceae;g__Tetrasphaera	5.69e-05	1.77e-05	1.19e-05	9.08e-06	7.39e-05	7.27e-06	6.75e-06	5.11e-05	8.41e-06	8.88e-05	0.000771989	0.000874836	0.00080876	0.000731663	0.000780488	0.000758146	0.00056634	0.000344955	0.000565261	0.000419189	0.000858568	0.000862283	0.000785158	0.000725667	0.000730565	0.000772728	0.000842682	0.000567956	0.000632006	0.000698017
k__Bacteria;p__Firmicutes;c__Clostridia;o__Clostridiales;f__Peptostreptococcaceae;g__Paraclostridium	0.00216181	0.00294601	0.00302544	0.00237073	0.00107235	0.000276188	0.000120595	0.000487671	0.000683835	0.00107815	2.65e-06	1.89e-06	1.47e-05	1.62e-06	1.6e-06	3.75e-06	3.06e-06	1.66e-06	2.17e-06	2.76e-06	3.42e-06	1.19e-06	9.3e-06	1.38e-06	2.11e-06	1.71e-06	1.41e-05	4.02e-06	3.42e-06	8.78e-05
k__Bacteria;p__Proteobacteria;c__Betaproteobacteria;o__Burkholderiales;f__Burkholderiaceae;g__Lautropia	3.19e-05	2.3e-05	2.62e-05	2.42e-05	7.26e-05	1.07e-05	7.81e-06	6.57e-05	3.17e-05	0.000261039	0.000654309	0.00062243	0.000639944	0.00066212	0.000631781	0.000677697	0.000749729	0.000667966	0.000777456	0.000695892	0.00073041	0.000652067	0.000671664	0.000709502	0.000767085	0.00059627	0.000623485	0.000679173	0.000804388	0.000805979
k__Bacteria;p__Proteobacteria;c__Betaproteobacteria;o__Burkholderiales;f__Comamonadaceae;g__Curvibacter	0.000216413	5.14e-05	3.34e-05	3.48e-05	0.000365398	8.04e-05	7.86e-05	0.000313857	0.000205367	0.000540357	0.000588224	0.000462401	0.000580655	0.000586891	0.000657898	0.000546009	0.000665138	0.000419599	0.000694673	0.000622528	0.00060415	0.000569567	0.000679241	0.00067244	0.000693396	0.00052852	0.00054631	0.000665294	0.000826221	0.000756981
k__Bacteria;p__Proteobacteria;c__Alphaproteobacteria;o__Rhizobiales;f__Xanthobacteraceae;g__Xanthobacter	0.00011778	1.24e-05	3.42e-05	2.88e-05	0.000203326	7.27e-06	2.44e-05	0.000224161	0.000153244	0.000380975	0.000744601	0.000725453	0.000568032	0.000704529	0.000687924	0.000581583	0.000628417	0.00060097	0.000579684	0.000561887	0.000749966	0.000688954	0.00063343	0.000716007	0.000688688	0.000710609	0.000573209	0.000691591	0.000585683	0.000666043
k__Bacteria;p__Proteobacteria;c__Gammaproteobacteria;o__Xanthomonadales;f__Rhodanobacteraceae;g__Dokdonella	6.09e-05	0.000127548	1.83e-05	1.36e-05	0.000513807	5.47e-06	9.78e-06	0.000106736	3.22e-05	0.000790813	0.000812452	0.000618996	0.00114333	0.000632061	0.00048112	0.000879717	0.000539455	0.000383524	0.000574152	0.000470501	0.000483965	0.000458311	0.000524587	0.000512363	0.000588542	0.000437902	0.00134448	0.000563938	0.000531006	0.000550399
k__Bacteria;p__Proteobacteria;c__Alphaproteobacteria;o__Rhodobacterales;f__Rhodobacteraceae;g__Rhodobacter	7.6e-05	3.1e-05	2.15e-05	3.1e-05	0.000134747	1.11e-05	2.47e-05	0.000145	0.000449645	0.000242439	0.00064406	0.000647499	0.000541384	0.000632223	0.000626274	0.000606876	0.000646559	0.000604129	0.000616631	0.000589875	0.000685981	0.000637391	0.000686991	0.000655683	0.00064876	0.000638251	0.000760063	0.000586949	0.000608085	0.000720024
k__Bacteria;p__Proteobacteria;c__Betaproteobacteria;o__Burkholderiales;f__Comamonadaceae;g__Comamonas	0.000120681	3.63e-05	3.26e-05	2.88e-05	0.000244581	1.33e-05	6.64e-05	0.000224007	0.00049216	0.000384182	0.000595999	0.000497085	0.000559999	0.000607526	0.000634802	0.000560532	0.000658144	0.00048859	0.000696648	0.000586483	0.000616111	0.000585234	0.000631536	0.00065312	0.000719365	0.000527837	0.000534301	0.00061562	0.000744396	0.00069864
k__Bacteria;p__Actinobacteria;c__Actinobacteria;o__Corynebacteriales;f__Corynebacteriaceae;g__Corynebacterium	8.06e-05	7e-05	3.26e-05	1.89e-05	0.000137694	2.32e-05	2.47e-05	0.000121608	4.49e-05	0.000244684	0.000693712	0.000723907	0.000616994	0.000674794	0.000670335	0.000714413	0.000731586	0.000599142	0.000632437	0.000754625	0.00065902	0.000669717	0.000613797	0.000614087	0.000600391	0.000667775	0.000597867	0.000563025	0.000611692	0.000645074
k__Eukaryota;p__Basidiomycota;c__Agaricomycetes;o__Polyporales;f__unclassified;g__Fibroporia	0.0018282	0.00294955	0.00289508	0.00286788	0.000794552	0.000208367	0.000104061	0.000409594	0.000747727	0.000919087	1.41e-06	3.61e-06	1.35e-05	1.79e-06	2.49e-06	2.28e-06	8.74e-07	9.97e-07	3.56e-06	7.85e-06	2.28e-06	9.92e-07	7.58e-06	9.86e-07	2.11e-06	2.39e-06	2.4e-06	1.64e-06	9.49e-07	2.08e-06
k__Bacteria;p__Proteobacteria;c__Betaproteobacteria;o__Nitrosomonadales;f__Thiobacillaceae;g__Thiobacillus	3.25e-05	6.2e-06	2.38e-05	1.36e-05	9.24e-05	3.35e-06	9.48e-06	6.69e-05	3.92e-05	0.000176057	0.000570731	0.000536062	0.000486812	0.000662933	0.000677086	0.000619278	0.000890713	0.000701714	0.000823294	0.000743175	0.000654274	0.000593563	0.000567814	0.000681311	0.000667588	0.000599171	0.000422061	0.000746195	0.000818817	0.000810962
k__Bacteria;p__Proteobacteria;c__Betaproteobacteria;o__Burkholderiales;f__unclassified;g__Aquabacterium	5.8e-05	1.42e-05	2.38e-05	2.42e-05	0.000142516	1.18e-05	1.21e-05	9.65e-05	6.03e-05	0.000282845	0.000605187	0.000515629	0.000560892	0.000640185	0.000667137	0.000587784	0.000679564	0.000445366	0.000684596	0.000608322	0.000699272	0.000648299	0.000691814	0.00072271	0.00073089	0.000616578	0.000553675	0.000622195	0.000790529	0.000742655
k__Bacteria;p__Actinobacteria;c__Actinobacteria;o__Pseudonocardiales;f__Pseudonocardiaceae;g__Saccharomonospora	0.000141568	0.00012932	7.23e-05	0.00015588	0.000224489	0.000106063	5.51e-05	0.0015129	5.26e-05	0.00044832	0.000551471	0.000659003	0.000460291	0.000530996	0.000516653	0.000577503	0.000530056	0.000522337	0.000469635	0.000779433	0.00051871	0.000589002	0.000525275	0.00047057	0.000435645	0.000545415	0.00060187	0.000441764	0.000470255	0.00043351
k__Bacteria;p__Actinobacteria;c__Actinobacteria;o__Micromonosporales;f__Micromonosporaceae;g__Salinispora	6.56e-05	4.78e-05	3.97e-05	4.69e-05	0.000246456	3.2e-05	5.17e-05	0.00025437	8.31e-05	0.000322611	0.000641233	0.000750693	0.000537303	0.000638073	0.000660563	0.000644408	0.000659674	0.000676112	0.000595293	0.000606414	0.000637945	0.000685979	0.00064738	0.000549228	0.000478333	0.000724774	0.000635814	0.000566495	0.000421084	0.00051199
k__Bacteria;p__Cyanobacteria;c__unclassified;o__Nostocales;f__Rivulariaceae;g__Calothrix	4.06e-05	2.21e-05	5.48e-05	2.72e-05	4.74e-05	4.58e-06	6.3e-06	5.58e-05	2.02e-05	0.000101337	0.000609958	0.000519922	0.000502367	0.000686168	0.000684193	0.000639513	0.000873882	0.00048992	0.000763626	0.000704373	0.000686741	0.000583251	0.000629986	0.000677763	0.00063967	0.000650368	0.000587459	0.000665659	0.000668077	0.000784594
k__Bacteria;p__Proteobacteria;c__Alphaproteobacteria;o__Rhodobacterales;f__Rhodobacteraceae;g__Labrenzia	7.72e-05	2.3e-05	3.1e-05	1.66e-05	0.000143319	7.76e-06	2.09e-05	0.000186672	0.000108808	0.000263925	0.000679046	0.000695061	0.000538833	0.000669595	0.000668025	0.000596432	0.000643936	0.000665306	0.000632832	0.000617652	0.000657122	0.000616171	0.000555931	0.000629069	0.000606721	0.000646784	0.000557358	0.000642648	0.00057619	0.000649641
k__Bacteria;p__Proteobacteria;c__Alphaproteobacteria;o__Rhizobiales;f__Beijerinckiaceae;g__Beijerinckia	0.00056221	3.45e-05	2.78e-05	2.65e-05	0.00185244	5.88e-06	1.51e-05	0.000274199	7.3e-05	0.000230894	0.000533095	0.000538123	0.00044091	0.000565118	0.00053744	0.000477472	0.00052022	0.000458998	0.000454619	0.000448662	0.000564848	0.000563022	0.000490831	0.000565985	0.000547315	0.000573914	0.00043471	0.00054038	0.000460193	0.000521125
k__Bacteria;p__Proteobacteria;c__Alphaproteobacteria;o__Rhizobiales;f__Xanthobacteraceae;g__Starkeya	0.00011952	3.37e-05	4.05e-05	1.97e-05	0.000199844	1.34e-05	2.78e-05	0.000416256	0.000145078	0.000343134	0.000620206	0.000609895	0.000476229	0.000589003	0.000579014	0.000525611	0.000542734	0.000510866	0.000511323	0.000456507	0.00058972	0.000601298	0.000526481	0.000612904	0.000586107	0.000616237	0.000515568	0.00140218	0.000509743	0.000589847
k__Bacteria;p__Proteobacteria;c__Alphaproteobacteria;o__Rhodospirillales;f__Rhodospirillaceae;g__Oceanibaculum	5.63e-05	1.15e-05	3.42e-05	2.35e-05	8.76e-05	7.11e-06	1.22e-05	9.85e-05	5.6e-05	0.000166436	0.00058522	0.000593755	0.000493952	0.00059469	0.000577771	0.000527896	0.000691149	0.00118831	0.000658319	0.000663663	0.00061744	0.000558659	0.000551797	0.000621578	0.000619706	0.000588761	0.000506121	0.000677347	0.00071459	0.000741202
k__Bacteria;p__Actinobacteria;c__Actinobacteria;o__Micrococcales;f__Intrasporangiaceae;g__Knoellia	2.67e-05	1.06e-05	8.74e-06	4.54e-06	3.75e-05	4.66e-06	4.1e-06	3.66e-05	6.25e-06	6.16e-05	0.000690885	0.000704676	0.000836174	0.000574379	0.000611172	0.00111976	0.00044481	0.000319354	0.000487417	0.000379751	0.000749396	0.000774825	0.000695258	0.000636955	0.000603475	0.00084628	0.000847645	0.000456556	0.000711552	0.000601681
k__Bacteria;p__Bacteroidetes;c__Cytophagia;o__Cytophagales;f__Cytophagaceae;g__Larkinella	6.09e-05	2.13e-05	4.05e-05	1.06e-05	0.00011921	4.98e-06	1.34e-05	7.59e-05	5.43e-05	0.000346662	0.000568964	0.000494338	0.000538706	0.000630111	0.000565156	0.000662848	0.000728089	0.000537964	0.000704354	0.000627617	0.000626364	0.00059872	0.000702491	0.000586093	0.000665316	0.000585007	0.000566965	0.000654519	0.000712881	0.000756565
k__Bacteria;p__Proteobacteria;c__Betaproteobacteria;o__Burkholderiales;f__Alcaligenaceae;g__Azohydromonas	4.12e-05	1.68e-05	3.1e-05	1.36e-05	0.000107958	4.74e-06	9.63e-06	7.39e-05	3.55e-05	0.000212294	0.000578329	0.000508418	0.000570582	0.000653834	0.000728432	0.000604918	0.000641969	0.000360083	0.000656343	0.000582242	0.000639654	0.000633623	0.000670458	0.000725076	0.000764326	0.000659925	0.000565684	0.000602471	0.000830967	0.000712758
k__Bacteria;p__Proteobacteria;c__Deltaproteobacteria;o__Myxococcales;f__Archangiaceae;g__Vitiosangium	2.26e-05	7.09e-06	2.94e-05	1.89e-05	4.37e-05	2.04e-06	7.21e-06	5.62e-05	1.44e-05	0.000133726	0.000585927	0.000483177	0.000489872	0.000627836	0.000623964	0.000533118	0.000766341	0.000483769	0.00071364	0.000739783	0.000651426	0.000602884	0.000610869	0.000629661	0.000647461	0.000618455	0.000586178	0.00068593	0.000893427	0.000882798
k__Eukaryota;p__Chlorophyta;c__Mamiellophyceae;o__Mamiellales;f__Bathycoccaceae;g__Ostreococcus	0.00188216	0.00279189	0.0027512	0.00233517	0.000819466	0.000183771	9.38e-05	0.00037257	0.000635796	0.000869702	1.59e-05	1.63e-05	2.83e-05	1.4e-05	1.92e-05	1.52e-05	2.05e-05	1.3e-05	1.52e-05	1.12e-05	1.69e-05	1.49e-05	2.34e-05	1.62e-05	1.54e-05	1.31e-05	2.13e-05	1.59e-05	1.75e-05	7.93e-05
k__Bacteria;p__Proteobacteria;c__Alphaproteobacteria;o__Rhodobacterales;f__Hyphomonadaceae;g__Hyphomonas	5.51e-05	3.63e-05	3.74e-05	3.03e-05	0.000149481	5.97e-06	1.56e-05	0.000184348	5.88e-05	0.000294711	0.000672685	0.000582079	0.00051193	0.000574379	0.000587365	0.000473066	0.000631258	0.000681931	0.000610901	0.000569308	0.000628642	0.000584837	0.000597781	0.000645235	0.000690799	0.000576815	0.000592903	0.000636439	0.000616818	0.000694903
k__Bacteria;p__Proteobacteria;c__Betaproteobacteria;o__Burkholderiales;f__unclassified;g__Thiomonas	6.32e-05	1.33e-05	2.46e-05	1.29e-05	0.000114388	1.83e-05	1.06e-05	0.000110919	7.35e-05	0.000221594	0.000561013	0.000522498	0.000504662	0.000629461	0.000625563	0.000553189	0.000703608	0.000551928	0.000730631	0.000642248	0.000644591	0.000554693	0.000613625	0.000638926	0.00067262	0.000556166	0.000454404	0.00065671	0.000762432	0.00076404
k__Bacteria;p__Planctomycetes;c__Planctomycetia;o__Planctomycetales;f__Planctomycetaceae;g__Roseimaritima	4.64e-06	6.2e-06	1.03e-05	3.03e-06	4.39e-05	3.11e-06	3.03e-06	4.28e-05	9.13e-06	0.000103261	0.000651481	0.000627066	0.000551711	0.000633686	0.000647593	0.000647345	0.000708636	0.000681266	0.000678076	0.000745932	0.000649337	0.000610222	0.000560925	0.000615072	0.00061224	0.000637739	0.000557198	0.000582931	0.000684974	0.000657323
k__Bacteria;p__Proteobacteria;c__Alphaproteobacteria;o__Caulobacterales;f__Caulobacteraceae;g__Asticcacaulis	0.000130544	3.72e-05	3.66e-05	3.41e-05	0.000240295	1.08e-05	2.44e-05	0.00017304	0.000104245	0.000422344	0.000609781	0.000533315	0.000545846	0.00054692	0.000537085	0.000523327	0.000560001	0.000638375	0.000550641	0.000543652	0.000574341	0.00053149	0.000572636	0.000626507	0.000635288	0.000540807	0.000625887	0.000647031	0.000582645	0.000638638
k__Bacteria;p__Proteobacteria;c__Gammaproteobacteria;o__Chromatiales;f__Woeseiaceae;g__Woeseia	3.6e-05	4.43e-06	3.74e-05	1.21e-05	0.000112245	3.51e-06	1.57e-05	0.000105032	3e-05	0.000295673	0.000576385	0.000635994	0.000352167	0.000513123	0.000539217	0.000441246	0.000705575	0.00179144	0.000723519	0.000535595	0.000526685	0.000461682	0.00045122	0.000528529	0.00056874	0.000459234	0.000442556	0.000588957	0.000590239	0.000609779
k__Bacteria;p__Proteobacteria;c__Alphaproteobacteria;o__Rhizobiales;f__Hyphomicrobiaceae;g__Blastochloris	5.28e-05	2.04e-05	2.78e-05	2.57e-05	0.000102869	4.33e-06	1.35e-05	0.000128889	5.07e-05	0.000321007	0.000708201	0.000653508	0.000509125	0.000658871	0.000622543	0.000523	0.000570056	0.000474958	0.000488997	0.000512695	0.000700411	0.00068003	0.000589686	0.000668891	0.000645027	0.000646272	0.000519731	0.000556998	0.000458674	0.000602719
k__Bacteria;p__Chloroflexi;c__Caldilineae;o__Caldilineales;f__Caldilineaceae;g__Litorilinea	6.96e-06	1.68e-05	1.19e-05	1.14e-05	3e-05	1.96e-06	3.34e-06	3.24e-05	6.49e-06	8.75e-05	0.000634695	0.000589978	0.00051703	0.000684706	0.000694142	0.000669701	0.000751477	0.000437387	0.000762836	0.000571853	0.000573202	0.000555486	0.000532853	0.000628281	0.000565494	0.000636203	0.000529018	0.000585305	0.000549991	0.000770476
k__Bacteria;p__candidate division NC10;c__unclassified;o__unclassified;f__unclassified;g__Candidatus Methylomirabilis	4.64e-06	4.43e-06	7.95e-06	9.08e-06	1.71e-05	5.72e-07	3.19e-06	1.78e-05	7.21e-06	4.27e-05	0.000576562	0.000489187	0.000411457	0.000699004	0.000708178	0.000542909	0.000942516	0.000468308	0.000812822	0.000769255	0.000610985	0.000546562	0.000512359	0.00060147	0.000562085	0.000575279	0.000384915	0.000645022	0.000679848	0.000757188
k__Bacteria;p__Cyanobacteria;c__unclassified;o__Oscillatoriales;f__Oscillatoriaceae;g__Oscillatoria	1.33e-05	1.24e-05	2.78e-05	1.66e-05	8.3e-06	1.14e-06	1.37e-06	1.13e-05	1.35e-05	3.24e-05	0.000253383	0.000177028	0.000191384	0.0002486	0.000238073	0.000282143	0.000309728	0.000160924	0.000272653	0.000251895	0.000446182	0.000327025	0.00304281	0.000254309	0.00023876	0.000246938	0.00418203	0.000249097	0.000346853	0.000311637
k__Bacteria;p__Actinobacteria;c__Actinobacteria;o__Pseudonocardiales;f__Pseudonocardiaceae;g__Kutzneria	0.000212352	0.000148806	7.95e-05	0.000114261	0.000450854	7.43e-05	4.76e-05	0.000817639	0.000113612	0.000535546	0.00045093	0.000555465	0.000426375	0.000493462	0.00047508	0.000538666	0.000470165	0.000420264	0.000393371	0.000656878	0.000494408	0.000565997	0.000523725	0.000424045	0.000395067	0.000521523	0.000485467	0.00041784	0.000415958	0.000384927
k__Eukaryota;p__Ascomycota;c__Sordariomycetes;o__Sordariales;f__Sordariaceae;g__Neurospora	0.00190885	0.00246505	0.00250636	0.0018819	0.00099011	0.000203546	0.000109446	0.000382174	0.000539718	0.00099509	3.89e-06	6.01e-06	1.48e-05	3.74e-06	2.84e-06	5.87e-06	3.93e-06	1.66e-06	3.75e-06	2.76e-06	3.23e-06	4.36e-06	1.34e-05	4.93e-06	6.33e-06	1.09e-05	1.04e-05	3.65e-06	3.42e-06	4.98e-06
k__Bacteria;p__Actinobacteria;c__Actinobacteria;o__Glycomycetales;f__Glycomycetaceae;g__Glycomyces	8.88e-05	0.00010629	2.15e-05	2.95e-05	0.000172787	1.37e-05	1.7e-05	0.000138339	3.75e-05	0.000200108	0.00102396	0.00119009	0.000475719	0.000445855	0.00057173	0.000585499	0.000503608	0.000469139	0.000500457	0.000580758	0.000504091	0.000604867	0.000466892	0.000489298	0.000416816	0.000523741	0.000552875	0.000467513	0.000420325	0.000391363
k__Bacteria;p__Bacteroidetes;c__Saprospiria;o__Saprospirales;f__Lewinellaceae;g__Lewinella	1.97e-05	1.68e-05	2.46e-05	1.06e-05	4.53e-05	3.02e-06	4.17e-06	3.93e-05	1.68e-05	9.36e-05	0.000583453	0.000451412	0.000512823	0.000560893	0.000603532	0.000596106	0.000689182	0.000499562	0.000631844	0.000563371	0.000550038	0.000549339	0.000573325	0.000665343	0.000693233	0.000566747	0.000489309	0.000602837	0.000658585	0.000669781
k__Bacteria;p__Proteobacteria;c__Gammaproteobacteria;o__Pasteurellales;f__Pasteurellaceae;g__Pasteurella	0.00199472	0.00272103	0.00239031	0.00205746	0.000518629	2.64e-05	3.08e-05	0.000167308	0.000635076	0.000820957	1.93e-05	1.8e-05	2.15e-05	1.75e-05	1.85e-05	1.45e-05	2.34e-05	1.83e-05	2e-05	1.93e-05	2.28e-05	1.84e-05	2.39e-05	1.83e-05	1.79e-05	1.74e-05	4.88e-05	1.68e-05	2.05e-05	0.000181667
k__Bacteria;p__Proteobacteria;c__Alphaproteobacteria;o__Rhodospirillales;f__Geminicoccaceae;g__Geminicoccus	3.54e-05	1.06e-05	3.42e-05	5.3e-06	5.33e-05	3.27e-06	9.94e-06	5.59e-05	2.83e-05	0.000108713	0.000557655	0.000678921	0.000595828	0.000547732	0.000535131	0.000521858	0.000506449	0.000481607	0.000507569	0.000668752	0.000635097	0.000583251	0.00053337	0.000586487	0.000593898	0.00060668	0.000687211	0.000529605	0.000598592	0.000563895
k__Bacteria;p__Proteobacteria;c__Gammaproteobacteria;o__Nevskiales;f__Sinobacteraceae;g__Hydrocarboniphaga	9.52e-05	2.13e-05	2.54e-05	3.41e-05	0.00019904	8.74e-06	2.63e-05	0.000155999	7.78e-05	0.000391558	0.000439799	0.000432524	0.000361347	0.000492	0.000581324	0.000434066	0.000815958	0.00051735	0.00078773	0.000381235	0.00050466	0.000467632	0.00046517	0.000525966	0.000561111	0.000531592	0.000299094	0.000750396	0.000744586	0.000699885
k__Bacteria;p__Proteobacteria;c__Alphaproteobacteria;o__Rhizobiales;f__Methylocystaceae;g__Pleomorphomonas	0.000102115	2.66e-05	3.5e-05	2.88e-05	0.000181092	4.58e-06	2.15e-05	0.000170251	0.000101122	0.000245646	0.000589638	0.000593068	0.000433132	0.000585916	0.000591096	0.000556942	0.000568963	0.000499728	0.000523968	0.000571005	0.000566366	0.000529308	0.000471026	0.000558297	0.000531408	0.000597977	0.000519891	0.000577817	0.000494555	0.000545624
k__Bacteria;p__Acidobacteria;c__Blastocatellia;o__unclassified;f__unclassified;g__Chloracidobacterium	9.28e-06	7.97e-06	1.83e-05	9.08e-06	1.55e-05	1.8e-06	3.56e-06	2.14e-05	6.49e-06	5.61e-05	0.000557655	0.000419818	0.000445628	0.000659196	0.000633203	0.000567386	0.000899237	0.000347116	0.000742683	0.000579274	0.000568645	0.000526334	0.000520109	0.000603836	0.000596658	0.000568965	0.000425584	0.000631874	0.000585873	0.000761133
k__Bacteria;p__Proteobacteria;c__Alphaproteobacteria;o__unclassified;f__unclassified;g__Phreatobacter	8.47e-05	1.77e-05	3.5e-05	3.56e-05	0.000136087	6.86e-06	1.92e-05	0.000153211	8.17e-05	0.000279318	0.000584337	0.00058414	0.000477121	0.000597614	0.000550588	0.000486284	0.000509291	0.00042442	0.000476353	0.000441664	0.000650666	0.000598125	0.00058297	0.000632224	0.000594548	0.000621015	0.000515888	0.000562477	0.000460003	0.000577597
k__Eukaryota;p__Chlorophyta;c__Trebouxiophyceae;o__unclassified;f__unclassified;g__Coccomyxa	0.00147776	0.00267674	0.00237441	0.00217475	0.000461033	0.000149861	7.94e-05	0.000324546	0.000568061	0.00067761	2.42e-05	1.96e-05	3.1e-05	2.34e-05	1.99e-05	2.86e-05	2.84e-05	1.6e-05	2.43e-05	2.52e-05	4.35e-05	4.68e-05	4.48e-05	0.000223358	3.55e-05	2.59e-05	3.83e-05	2.78e-05	2.75e-05	5.07e-05
k__Bacteria;p__Proteobacteria;c__Gammaproteobacteria;o__Acidiferrobacterales;f__Acidiferrobacteraceae;g__Sulfurifustis	2.61e-05	1.77e-05	1.99e-05	1.51e-05	6.54e-05	2.78e-06	8.57e-06	6.01e-05	2.83e-05	0.00014495	0.000513304	0.000515458	0.000392841	0.000647822	0.000675487	0.000504234	0.000790166	0.000641201	0.000679855	0.000727697	0.000550798	0.000481911	0.000447259	0.000525177	0.000546828	0.000497119	0.000377229	0.000584027	0.000620805	0.000640091
k__Bacteria;p__Proteobacteria;c__Betaproteobacteria;o__Burkholderiales;f__Burkholderiaceae;g__Polynucleobacter	4.53e-05	1.51e-05	1.11e-05	1.59e-05	6.62e-05	2.7e-06	6.98e-06	5.55e-05	2.88e-05	0.00014495	0.000496518	0.000469441	0.000415792	0.000566255	0.000538329	0.000517615	0.000686559	0.000527657	0.000661282	0.000557434	0.000586492	0.00053506	0.000529236	0.000604624	0.000608182	0.000523912	0.000365701	0.000641918	0.000695415	0.000719402
k__Bacteria;p__Actinobacteria;c__Actinobacteria;o__Pseudonocardiales;f__Pseudonocardiaceae;g__Umezawaea	0.000258187	0.000849436	3.97e-05	6.05e-05	0.000277531	4.88e-05	2.18e-05	0.000300379	0.000534914	0.000280921	0.000318585	0.000324179	0.000299125	0.000182469	0.000274139	0.000304172	0.000157377	0.000171065	0.000220098	0.000393321	0.000455675	0.000367085	0.00038922	0.000203644	0.000756048	0.000841161	0.00251828	0.00021659	0.000325021	0.000234818
k__Bacteria;p__Proteobacteria;c__Betaproteobacteria;o__Burkholderiales;f__Alcaligenaceae;g__Pusillimonas	9.92e-05	9.74e-06	1.27e-05	1.44e-05	0.000177877	2.34e-05	1.56e-05	0.000130438	0.000238033	0.000573708	0.000488214	0.000498459	0.000542404	0.000502724	0.000511146	0.000496728	0.000568745	0.000517682	0.000616038	0.000494673	0.000495167	0.000460294	0.000456731	0.000491269	0.00055121	0.000460428	0.00047618	0.000519561	0.000587961	0.000589017
k__Bacteria;p__Bacteroidetes;c__Flavobacteriia;o__Flavobacteriales;f__Flavobacteriaceae;g__Chryseobacterium	0.000171738	3.9e-05	2.23e-05	1.82e-05	0.000254493	5.65e-05	2.72e-05	0.000153365	0.000190715	0.000260077	0.000512774	0.000342208	0.000491784	0.000465028	0.000436171	0.000474535	0.000549291	0.000353932	0.00053602	0.000444209	0.000466498	0.000486075	0.000539053	0.000545483	0.000662556	0.000446264	0.000707385	0.00065178	0.000660103	0.000631371
k__Bacteria;p__Actinobacteria;c__Actinobacteria;o__Streptomycetales;f__Streptomycetaceae;g__Kitasatospora	9.69e-05	4.34e-05	4.69e-05	3.03e-05	0.000449782	2.33e-05	1.74e-05	0.000201079	4.8e-05	0.000269056	0.000531328	0.000596674	0.000475209	0.000554069	0.000534065	0.000546988	0.000593881	0.000470137	0.000495912	0.000614471	0.000495737	0.000545967	0.000473437	0.000478061	0.000437755	0.00057801	0.000479382	0.00047354	0.000452789	0.000476279
k__Bacteria;p__Planctomycetes;c__Planctomycetia;o__Planctomycetales;f__Planctomycetaceae;g__Planctopirus	2.49e-05	1.15e-05	2.31e-05	9.84e-06	6.78e-05	3.02e-06	4.17e-06	5.17e-05	1.18e-05	0.00011192	0.000580803	0.000565424	0.000500837	0.000532134	0.000551654	0.00053736	0.000605685	0.000522171	0.000548072	0.00058097	0.000565417	0.000560444	0.000526136	0.00057387	0.000538388	0.000547804	0.000513647	0.000531797	0.000582265	0.000558289
k__Bacteria;p__Proteobacteria;c__Alphaproteobacteria;o__Rhodospirillales;f__Rhodospirillaceae;g__Thalassospira	8.82e-05	3.81e-05	2.78e-05	1.82e-05	0.000136087	7.6e-06	2.12e-05	0.000138649	9.54e-05	0.000224801	0.000511538	0.000502923	0.000423952	0.000494762	0.000529801	0.000468987	0.000559783	0.000815757	0.000555975	0.000597297	0.000496876	0.000474771	0.000471715	0.000501915	0.000519722	0.000511113	0.000439354	0.000520657	0.000569546	0.000560365
k__Bacteria;p__Proteobacteria;c__Alphaproteobacteria;o__Rhizobiales;f__unclassified;g__Methyloligella	4.35e-05	7.09e-06	2.31e-05	1.06e-05	5.01e-05	2.86e-06	1.27e-05	6.88e-05	5.04e-05	8.59e-05	0.000620736	0.000762369	0.000462458	0.000699979	0.000607441	0.000492811	0.000579892	0.000325172	0.000590353	0.000529658	0.000696044	0.000600108	0.000525964	0.000549228	0.000506575	0.000543367	0.000431508	0.000478471	0.000402669	0.000539811
k__Bacteria;p__Proteobacteria;c__Gammaproteobacteria;o__Methylococcales;f__Methylococcaceae;g__Methylobacter	3.89e-05	1.15e-05	2.54e-05	1.82e-05	8.57e-05	3.84e-06	1.16e-05	6.63e-05	3.6e-05	0.000184074	0.000498639	0.000485066	0.000422422	0.000582178	0.000554141	0.000479594	0.000690056	0.000494408	0.000653775	0.000553618	0.000555734	0.000479333	0.000485837	0.000504281	0.000526377	0.000516062	0.000444477	0.000543484	0.000555497	0.000661891
k__Bacteria;p__Spirochaetes;c__Spirochaetia;o__Leptospirales;f__Leptospiraceae;g__Leptospira	8.06e-05	2.39e-05	2.23e-05	1.44e-05	6.43e-05	1.54e-05	8.04e-06	6.2e-05	2.19e-05	0.000156495	0.000489627	0.00040488	0.000407504	0.000552119	0.000520384	0.000499828	0.000709947	0.000457835	0.000642118	0.000579062	0.000540165	0.00047259	0.00051787	0.000560465	0.000568578	0.000508894	0.000354813	0.000571791	0.00063903	0.000658777
k__Bacteria;p__Proteobacteria;c__Betaproteobacteria;o__Burkholderiales;f__Burkholderiaceae;g__Pandoraea	3.77e-05	8.86e-06	2.23e-05	2.12e-05	0.000104476	3.76e-06	2.97e-05	8.32e-05	7.01e-05	0.000194015	0.000495105	0.000448493	0.000417577	0.000545295	0.000532288	0.000453648	0.000638253	0.000553258	0.000605962	0.000516512	0.000545671	0.000484291	0.000495826	0.000543708	0.000563059	0.00048961	0.000373707	0.000592975	0.000609793	0.000618914
k__Bacteria;p__Actinobacteria;c__Actinobacteria;o__Streptosporangiales;f__Streptosporangiaceae;g__Herbidospora	0.000161875	3.37e-05	2.31e-05	3.33e-05	0.00101931	1.84e-05	1.93e-05	0.000300844	2.93e-05	0.000236987	0.000436441	0.000506014	0.000427522	0.000579416	0.000477034	0.000485795	0.000453334	0.000455008	0.000388234	0.000520541	0.000423398	0.000485084	0.000519764	0.000423454	0.000377212	0.000482614	0.000430227	0.00042204	0.000362421	0.000391778
k__Archaea;p__Thaumarchaeota;c__unclassified;o__Nitrosopumilales;f__Nitrosopumilaceae;g__Nitrosoarchaeum	1.74e-06	4.43e-06	1.59e-06	7.57e-07	1.34e-06	7.35e-07	2.28e-07	0	1.2e-06	3.21e-06	0.000556949	0.000487126	0.000173788	0.000258511	0.000634624	3.61e-05	3.26e-05	0.00329844	3.02e-05	0.00078431	0.000816418	0.000635805	0.00102454	0.00119111	0.000416979	4.81e-05	2.55e-05	0.000106469	0.000202948	2.68e-05
k__Bacteria;p__Bacteroidetes;c__Cytophagia;o__Cytophagales;f__Hymenobacteraceae;g__Adhaeribacter	4.53e-05	1.51e-05	2.07e-05	1.21e-05	6.75e-05	1.39e-06	8.42e-06	4.88e-05	3.29e-05	0.000112561	0.000493161	0.000398698	0.00049561	0.000410596	0.000414673	0.000590068	0.000523061	0.000380698	0.000501247	0.000428094	0.00049137	0.000491628	0.000636875	0.000522023	0.00059049	0.000499338	0.00060251	0.000519926	0.00080268	0.000595038
k__Bacteria;p__Bacteroidetes;c__Chitinophagia;o__Chitinophagales;f__Chitinophagaceae;g__Taibaiella	0.00122828	0.000250668	1.83e-05	9.84e-06	0.00140132	0.000107779	1.43e-05	0.000309055	0.000150362	0.00134592	0.000356044	0.000203985	0.000508487	0.000219678	0.000222083	0.00029585	0.00027082	0.000161422	0.000252896	0.000231964	0.000257457	0.000261184	0.00030776	0.000271854	0.000322351	0.000220999	0.000461129	0.000401404	0.000336981	0.00034797
k__Bacteria;p__Bacteroidetes;c__Flavobacteriia;o__Flavobacteriales;f__Crocinitomicaceae;g__Crocinitomix	0.00145687	0.00198763	0.0016725	0.00134087	0.000582386	0.000175273	9.17e-05	0.000283959	0.000386234	0.000711282	8.8e-05	8.17e-05	7.09e-05	6.92e-05	7.85e-05	0.000158613	0.00010317	0.000114376	9.56e-05	0.00016687	8.71e-05	8.01e-05	9.3e-05	9.5e-05	9.75e-05	8.29e-05	6.8e-05	0.000110304	0.000142576	0.0001744
k__Bacteria;p__Proteobacteria;c__Alphaproteobacteria;o__Rhodobacterales;f__Rhodobacteraceae;g__Roseovarius	4.12e-05	2.66e-05	2.23e-05	1.44e-05	8.97e-05	1.05e-05	1.24e-05	8.97e-05	6.08e-05	0.000174453	0.000522139	0.000523356	0.000432367	0.000489238	0.00051541	0.000488569	0.000553881	0.000604461	0.000505791	0.000526054	0.000508078	0.000472788	0.000462242	0.000523403	0.000514041	0.000507359	0.000455205	0.000491437	0.000500441	0.000545001
k__Bacteria;p__Proteobacteria;c__Alphaproteobacteria;o__Rhizobiales;f__Hyphomicrobiaceae;g__Filomicrobium	0.000104435	1.59e-05	5.25e-05	3.03e-05	0.000176537	6.78e-06	3.82e-05	0.00024523	0.000126583	0.000286373	0.0005467	0.00053177	0.000413242	0.000562193	0.00055876	0.00046556	0.000466012	0.000319354	0.000481094	0.000375722	0.000529723	0.000520583	0.000431242	0.000507041	0.000475736	0.000591321	0.000454404	0.000457469	0.000333754	0.000498287
k__Bacteria;p__Actinobacteria;c__Actinobacteria;o__Bifidobacteriales;f__Bifidobacteriaceae;g__Bifidobacterium	0.000930055	0.00167761	0.00158267	0.00145513	0.000431834	0.000101323	5.17e-05	0.000260412	0.000400645	0.000492254	0.000164505	0.000169816	0.000145738	0.00016882	0.000167362	0.000185212	0.000172678	0.000140808	0.000159838	0.000217334	0.000157967	0.000162422	0.000159477	0.000143123	0.000139101	0.000161952	0.000138339	0.000147376	0.000154347	0.000162358
k__Bacteria;p__Proteobacteria;c__Alphaproteobacteria;o__Rhodospirillales;f__Rhodospirillaceae;g__Tistlia	5.28e-05	1.33e-05	1.03e-05	2.27e-06	8.47e-05	1.34e-05	1.36e-05	8.83e-05	3.8e-05	0.000115447	0.000542106	0.000481632	0.000362622	0.000494762	0.000523938	0.000437329	0.000567214	0.000971028	0.00055558	0.000544712	0.000447321	0.000421622	0.000407131	0.000468007	0.000475411	0.000480054	0.000387317	0.000511891	0.000537841	0.00055123
k__Bacteria;p__Proteobacteria;c__Alphaproteobacteria;o__Rhizobiales;f__Rhizobiaceae;g__Neorhizobium	0.000456615	3.72e-05	2.62e-05	3.33e-05	0.00128479	1.25e-05	2.28e-05	0.000324081	0.000918265	0.000216463	0.00027123	0.000303917	0.000285992	0.000278984	0.000289241	0.000296503	0.000260984	0.000326003	0.00026396	0.000301087	0.000279291	0.000293509	0.000279688	0.000295314	0.000268788	0.000282776	0.00037787	0.00163995	0.000260662	0.000329492
k__Bacteria;p__Proteobacteria;c__Alphaproteobacteria;o__Rhizobiales;f__Xanthobacteraceae;g__Labrys	0.00132575	1.59e-05	2.7e-05	1.66e-05	0.000168501	4.66e-06	1.65e-05	0.000164829	7.47e-05	0.00022416	0.000452521	0.000455876	0.000376393	0.000423595	0.00046211	0.000417584	0.000405028	0.000437719	0.000391593	0.000413676	0.000470675	0.000429158	0.000394387	0.000432522	0.000424445	0.000456503	0.000394842	0.000421127	0.000381026	0.000427073
k__Bacteria;p__Proteobacteria;c__Alphaproteobacteria;o__Sphingomonadales;f__Sphingomonadaceae;g__Sphingorhabdus	6.38e-05	2.57e-05	1.91e-05	1.66e-05	0.000179216	1.06e-05	5.39e-06	0.000139888	6.85e-05	0.000344738	0.000452521	0.000414324	0.000640965	0.000348852	0.000375409	0.000426886	0.000355192	0.000556084	0.000387049	0.000351763	0.000550038	0.000456129	0.000389048	0.000734736	0.000524104	0.000384828	0.000734284	0.000426241	0.000587581	0.00049891
k__Bacteria;p__Actinobacteria;c__Actinobacteria;o__Corynebacteriales;f__Mycobacteriaceae;g__Mycobacteroides	0.000653301	0.000641285	0.000611289	0.000505474	0.000532827	8.52e-05	2.64e-05	0.000271875	0.000166695	0.000356283	0.000346679	0.000392174	0.000334444	0.000318955	0.00032051	0.000342194	0.000313225	0.000319021	0.000320664	0.000350702	0.000319542	0.000371845	0.000319126	0.000306945	0.000302224	0.00033056	0.000309981	0.000290552	0.000281166	0.000297104
k__Bacteria;p__Planctomycetes;c__Planctomycetia;o__Planctomycetales;f__Planctomycetaceae;g__Thermogutta	3.48e-06	6.2e-06	1.75e-05	5.3e-06	3.13e-05	2.37e-06	1.97e-06	2.9e-05	5.52e-06	7.92e-05	0.000532388	0.000494681	0.000417322	0.000556831	0.00050546	0.000524306	0.000588417	0.00053414	0.000528117	0.000577153	0.000517191	0.000477746	0.000451048	0.000463867	0.000459017	0.000508894	0.000427505	0.000451077	0.000535563	0.000513235
k__Bacteria;p__Actinobacteria;c__Actinobacteria;o__Streptosporangiales;f__Thermomonosporaceae;g__Actinocorallia	9.05e-05	3.45e-05	2.31e-05	2.42e-05	0.000765621	1.36e-05	1.32e-05	9.33e-05	1.56e-05	0.00014463	0.000479025	0.000517003	0.000432877	0.000475589	0.00052145	0.000481226	0.000434099	0.000388677	0.000434664	0.000461171	0.00043536	0.000454741	0.000428487	0.000444153	0.000445546	0.000473057	0.000435191	0.000445234	0.000390898	0.000433925
k__Bacteria;p__Proteobacteria;c__Betaproteobacteria;o__Nitrosomonadales;f__Methylophilaceae;g__Methylobacillus	2.61e-05	4.43e-06	3.18e-06	7.57e-06	6.43e-05	3.62e-05	3.91e-05	5.64e-05	0.000779433	0.000177981	0.000289783	0.000281939	0.000251949	0.000390935	0.000480232	0.000389843	0.000749073	0.000652838	0.000748611	0.000860429	0.000344035	0.000319489	0.000373721	0.00035209	0.000345399	0.000306497	0.000239851	0.0004666	0.000586062	0.000519049
k__Bacteria;p__Proteobacteria;c__Gammaproteobacteria;o__Cellvibrionales;f__Cellvibrionaceae;g__Cellvibrio	0.000103855	5.49e-05	2.62e-05	2.8e-05	0.000184306	1.13e-05	2.11e-05	0.000147014	9.42e-05	0.0002992	0.000422306	0.000355429	0.000382768	0.00081713	0.000361373	0.000385927	0.000398689	0.00038369	0.000441579	0.000438696	0.000456055	0.000372638	0.000506159	0.000463867	0.000466971	0.000376125	0.000503079	0.00062256	0.000499491	0.000495588
k__Bacteria;p__Bacteroidetes;c__Cytophagia;o__Cytophagales;f__Cyclobacteriaceae;g__Cecembia	0.00118418	0.0016475	0.00184977	0.00178353	0.000608371	0.000139075	7.67e-05	0.000284423	0.000519542	0.000719941	6.03e-05	4.84e-05	6.29e-05	5.33e-05	5.51e-05	6.17e-05	7.76e-05	6.05e-05	7.31e-05	6.89e-05	6.53e-05	6.13e-05	6.54e-05	6.88e-05	6.74e-05	5.15e-05	4.88e-05	6.85e-05	8.32e-05	7.62e-05
k__Bacteria;p__Bacteroidetes;c__Chitinophagia;o__Chitinophagales;f__Chitinophagaceae;g__Filimonas	0.000247744	2.66e-05	3.1e-05	3.25e-05	0.00024592	3.43e-06	2.58e-05	0.000139268	0.000218818	0.000236667	0.00042637	0.000276101	0.000431857	0.000391423	0.0003715	0.000395718	0.000482187	0.000225426	0.000488009	0.000287729	0.000456815	0.000450577	0.000471715	0.000509603	0.000606883	0.000418447	0.00040605	0.000545128	0.000561192	0.000672064
k__Eukaryota;p__Chlorophyta;c__Chlorophyceae;o__unclassified;f__Microsporaceae;g__Microspora	0.00153056	0.00262537	0.00221225	0.00199995	0.000347985	3.37e-05	1.74e-05	0.000110454	0.000436915	0.000666707	3.53e-07	1.03e-06	5.99e-06	1.62e-07	3.55e-07	1.31e-06	2.19e-07	3.32e-07	1.98e-07	6.36e-07	2.28e-06	1.98e-06	7.23e-06	1.97e-07	4.87e-07	8.53e-07	6.72e-06	3.65e-07	9.49e-07	1.35e-05
k__Bacteria;p__Armatimonadetes;c__Fimbriimonadia;o__Fimbriimonadales;f__Fimbriimonadaceae;g__Fimbriimonas	6.96e-06	2.66e-06	1.27e-05	6.05e-06	4.21e-05	1.55e-06	2.28e-06	4.63e-05	1.78e-05	7.31e-05	0.000516838	0.000390285	0.000464498	0.000484526	0.000531755	0.000523	0.000485247	0.000379534	0.000488602	0.000530718	0.000398906	0.000422614	0.000427109	0.000499352	0.000488883	0.000513332	0.000407171	0.00052997	0.000584733	0.00060355
k__Bacteria;p__Proteobacteria;c__Gammaproteobacteria;o__Enterobacterales;f__Enterobacteriaceae;g__Salmonella	0.000986334	0.00137823	0.00132989	0.00140519	0.00040317	0.000104674	0.000946182	0.000220908	0.00115942	0.000472692	6.29e-05	6.89e-05	6.54e-05	6.65e-05	6.96e-05	6.67e-05	8.24e-05	6.32e-05	8.85e-05	6.42e-05	7.01e-05	7.02e-05	7.23e-05	7.57e-05	7.27e-05	7e-05	6.47e-05	6.39e-05	8.3e-05	8.72e-05
k__Bacteria;p__Firmicutes;c__Bacilli;o__Bacillales;f__Alicyclobacillaceae;g__Alicyclobacillus	7.48e-05	9.65e-05	0.000112878	9.91e-05	7.15e-05	8.09e-06	7.81e-06	4.93e-05	3.31e-05	9.36e-05	0.000411527	0.000415354	0.000334189	0.000504186	0.000487694	0.00045071	0.000612023	0.000403805	0.000524561	0.000559343	0.000447891	0.000416863	0.000384226	0.000442379	0.000429964	0.000474422	0.000327274	0.000467148	0.000471014	0.000501609
k__Bacteria;p__Proteobacteria;c__Alphaproteobacteria;o__Rhodospirillales;f__unclassified;g__Elioraea	5.8e-05	1.15e-05	1.11e-05	1.14e-05	0.000100725	3.35e-06	9.4e-06	6.17e-05	3.22e-05	9.33e-05	0.0004269	0.000442827	0.000355227	0.000468927	0.000464242	0.000395718	0.000506668	0.000591162	0.000474377	0.00047453	0.000485294	0.000474771	0.000439509	0.000483778	0.000479793	0.000439779	0.000367943	0.000485228	0.000498352	0.000511782
k__Bacteria;p__Bacteroidetes;c__Bacteroidia;o__Bacteroidales;f__Bacteroidaceae;g__Bacteroides	8.82e-05	1.42e-05	8.74e-06	8.32e-06	8.49e-05	4.33e-06	1.11e-05	5.36e-05	0.000149882	0.00029888	0.000408347	0.000353025	0.000406611	0.000436593	0.000416805	0.000451526	0.000511039	0.000382693	0.000519819	0.000504002	0.000436119	0.000440264	0.000406959	0.000432916	0.000487584	0.000411962	0.000353052	0.000472627	0.000522083	0.000524862
k__Bacteria;p__Verrucomicrobia;c__Verrucomicrobiae;o__Verrucomicrobiales;f__Verrucomicrobiaceae;g__Prosthecobacter	5.8e-05	6.2e-06	1.83e-05	3.78e-06	5.84e-05	6.21e-06	8.34e-06	4.91e-05	3.75e-05	0.000160664	0.000427783	0.000301685	0.000547886	0.000450567	0.00038518	0.000531649	0.000463171	0.000389675	0.00043743	0.000362364	0.000450169	0.000439273	0.000468615	0.000448687	0.000493752	0.00045821	0.000475539	0.000553894	0.000607705	0.000497456
k__Bacteria;p__Proteobacteria;c__Betaproteobacteria;o__Burkholderiales;f__Oxalobacteraceae;g__Collimonas	6.21e-05	7.97e-06	2.7e-05	1.21e-05	0.000105815	9.56e-06	1.81e-05	8.89e-05	7.06e-05	0.000174133	0.000407463	0.000371741	0.000394499	0.000439193	0.00045145	0.000420195	0.000526777	0.000389675	0.000541552	0.00046732	0.000468586	0.00041012	0.000443815	0.000452236	0.000499108	0.000410938	0.000356575	0.000484497	0.00053955	0.000526731
k__Bacteria;p__Proteobacteria;c__Gammaproteobacteria;o__Methylococcales;f__Methylococcaceae;g__Methylomonas	4.76e-05	8.86e-06	1.59e-05	1.44e-05	8.89e-05	4.98e-06	3.45e-05	8.52e-05	3.94e-05	0.000218067	0.000418948	0.000412607	0.000360072	0.000500124	0.000472415	0.000413505	0.000579018	0.000395826	0.000556765	0.000443997	0.000457384	0.000397031	0.000411954	0.000446716	0.000467133	0.000422884	0.000342645	0.000496733	0.000478418	0.000540226
k__Bacteria;p__Proteobacteria;c__Gammaproteobacteria;o__Enterobacterales;f__Pectobacteriaceae;g__Dickeya	0.00111456	0.00162181	0.0017194	0.00157317	0.000530684	0.000139075	0.000401227	0.000264594	0.000543801	0.000590384	5.25e-05	5.03e-05	5.55e-05	5.39e-05	5.44e-05	5.17e-05	6.93e-05	5.27e-05	5.37e-05	5.43e-05	4.96e-05	4.28e-05	4.89e-05	5.18e-05	5.63e-05	5.22e-05	4.15e-05	5.81e-05	5.62e-05	6.39e-05
k__Bacteria;p__Bacteroidetes;c__Sphingobacteriia;o__Sphingobacteriales;f__Sphingobacteriaceae;g__Sphingobacterium	0.000120681	1.15e-05	1.03e-05	1.51e-05	0.000199844	7.76e-06	3.49e-05	0.000102863	0.000187112	0.00016836	0.000440859	0.00033139	0.000406611	0.000406859	0.000388556	0.000455932	0.000474974	0.000374048	0.000438813	0.000398622	0.000405931	0.000401791	0.000445192	0.000451447	0.000486773	0.000391996	0.00040605	0.000501116	0.000515629	0.000532336
k__Bacteria;p__Acidobacteria;c__Acidobacteriia;o__Acidobacteriales;f__Acidobacteriaceae;g__Terriglobus	2.49e-05	5.31e-06	1.19e-05	6.81e-06	5.81e-05	1.31e-06	5.69e-06	4.04e-05	1.8e-05	8.95e-05	0.00043061	0.00036058	0.000356502	0.000488588	0.000479699	0.000416768	0.000604592	0.000338804	0.000539181	0.000483859	0.00050485	0.000463864	0.000419359	0.000472344	0.000475411	0.000466401	0.000352412	0.000499655	0.000496454	0.000589017
k__Bacteria;p__Rhodothermaeota;c__Rhodothermia;o__Rhodothermales;f__Rubricoccaceae;g__Rubrivirga	2.32e-06	0	1.27e-05	9.08e-06	2.33e-05	5.72e-07	2.58e-06	1.66e-05	3.6e-06	9.04e-05	0.000499699	0.000477168	0.000460673	0.000472665	0.00059003	0.000507008	0.00057399	0.000314865	0.000406806	0.000360668	0.000421879	0.000431142	0.00040627	0.000564014	0.000528325	0.000486027	0.000537664	0.00045053	0.000370774	0.00040818
k__Bacteria;p__Proteobacteria;c__Gammaproteobacteria;o__Oceanospirillales;f__Alcanivoracaceae;g__Alcanivorax	0.000160714	0.000165636	0.000158983	0.000159663	0.000126443	1.45e-05	3e-05	9.96e-05	8.48e-05	0.000241477	0.000378308	0.000361782	0.000317613	0.000411083	0.000430485	0.000361776	0.000506668	0.000421926	0.000484256	0.000415372	0.000381248	0.000359747	0.000370793	0.00041064	0.000427529	0.000410938	0.00030838	0.000463678	0.00047614	0.000475656
k__Bacteria;p__Bacteroidetes;c__Cytophagia;o__Cytophagales;f__Cytophagaceae;g__Runella	4.7e-05	1.77e-05	1.43e-05	1.21e-05	0.000115191	3.92e-06	1e-05	5.33e-05	4.44e-05	0.000138537	0.000420892	0.00033843	0.000378178	0.000414333	0.000415384	0.00044761	0.000547761	0.000351605	0.000521004	0.000412192	0.000437638	0.000422416	0.000437787	0.000451053	0.000511444	0.000411621	0.000394201	0.000491254	0.000527589	0.000599813
k__Bacteria;p__Proteobacteria;c__Betaproteobacteria;o__Burkholderiales;f__unclassified;g__Aquincola	3.77e-05	1.33e-05	1.27e-05	6.81e-06	8.57e-05	3.11e-06	5.76e-06	5.96e-05	3.89e-05	0.000183753	0.000412057	0.000328471	0.000408524	0.00041742	0.000495334	0.000451853	0.000380547	0.000205976	0.000412141	0.000367241	0.000436309	0.000451766	0.000541981	0.00050842	0.000574259	0.000485856	0.000435031	0.00042058	0.000673772	0.000521125
k__Bacteria;p__Bacteroidetes;c__Chitinophagia;o__Chitinophagales;f__Chitinophagaceae;g__Segetibacter	3.02e-05	4.43e-06	1.27e-05	1.21e-05	6.67e-05	1.88e-06	8.8e-06	6.2e-05	4.59e-05	0.000127313	0.000458175	0.000291383	0.000467814	0.000415633	0.000377896	0.000459033	0.000452897	0.000233406	0.00045541	0.000280944	0.000480358	0.000476358	0.000487387	0.000536808	0.000602663	0.00043227	0.000449281	0.000483036	0.000523223	0.000611439
k__Bacteria;p__Actinobacteria;c__Actinobacteria;o__Streptosporangiales;f__Streptosporangiaceae;g__Sphaerisporangium	0.000287777	1.77e-05	2.62e-05	3.93e-05	0.00107476	3.9e-05	1.61e-05	0.000243991	1.56e-05	0.000244042	0.00037283	0.000439736	0.000331129	0.000431556	0.000393353	0.000434392	0.000381859	0.000419765	0.000325801	0.000468381	0.000339478	0.000366292	0.000371654	0.000329813	0.000284532	0.000369469	0.000328074	0.000329634	0.000307175	0.000297934
k__Bacteria;p__Proteobacteria;c__Alphaproteobacteria;o__Rhizobiales;f__Aurantimonadaceae;g__Aurantimonas	7.66e-05	2.48e-05	2.7e-05	1.82e-05	0.000128318	4.25e-06	1.79e-05	0.000150422	8.29e-05	0.000187281	0.000452521	0.00046635	0.000384043	0.000428144	0.000446831	0.000443041	0.000425793	0.000423921	0.000399101	0.000442513	0.000443524	0.000415276	0.000399554	0.000451645	0.000418277	0.000423055	0.000426064	0.000420214	0.000416907	0.000423751
k__Bacteria;p__Actinobacteria;c__Actinobacteria;o__Kineosporiales;f__Kineosporiaceae;g__Kineosporia	4.12e-05	7.97e-06	2.23e-05	1.59e-05	8.87e-05	7.93e-06	1.44e-05	5.76e-05	1.49e-05	0.000138857	0.000494221	0.00053881	0.000492804	0.000446505	0.00046513	0.000486937	0.00042011	0.00031021	0.000405621	0.000445481	0.000506939	0.00049143	0.000509948	0.000416948	0.000383867	0.000480907	0.000491551	0.000338765	0.000352359	0.000355445
k__Bacteria;p__Proteobacteria;c__Alphaproteobacteria;o__Rhodobacterales;f__Rhodobacteraceae;g__Acuticoccus	6.44e-05	1.95e-05	1.35e-05	1.97e-05	9.4e-05	4.98e-06	1.75e-05	0.000102244	8.07e-05	0.000127633	0.000447043	0.000484894	0.000361857	0.00041937	0.00044612	0.000399797	0.000459236	0.000465981	0.00043743	0.000480254	0.000437448	0.000435108	0.000388359	0.000449476	0.000427367	0.000456162	0.000402207	0.000450347	0.000420515	0.000427489
k__Bacteria;p__Bacteroidetes;c__Cytophagia;o__Cytophagales;f__Hymenobacteraceae;g__Rufibacter	4.18e-05	1.42e-05	1.59e-05	1.29e-05	5.55e-05	2.86e-06	6.22e-06	4.52e-05	3.94e-05	0.000103582	0.000403046	0.000310099	0.000394371	0.00034544	0.000383226	0.000438145	0.000462952	0.000339469	0.00043585	0.000379539	0.000409728	0.00042777	0.000401793	0.000468204	0.000510308	0.000401382	0.000464171	0.000467331	0.000887542	0.000562026
k__Bacteria;p__Proteobacteria;c__Alphaproteobacteria;o__Rhizobiales;f__Beijerinckiaceae;g__Methylocapsa	6.9e-05	1.51e-05	1.83e-05	2.57e-05	0.000101797	1.16e-05	1.06e-05	0.000104412	5.81e-05	0.000193695	0.000440329	0.000470643	0.000367468	0.000484363	0.000451805	0.000405835	0.000462515	0.00035626	0.000425773	0.000404347	0.000489661	0.000442049	0.000412298	0.000469584	0.000449766	0.000446264	0.000367462	0.000434276	0.000389	0.000444098
k__Eukaryota;p__Ascomycota;c__Sordariomycetes;o__Diaporthales;f__Valsaceae;g__Valsa	0.0014766	0.00190437	0.00191097	0.00156863	0.000577564	0.000116767	6.53e-05	0.000247399	0.000385993	0.000679535	6.71e-06	8.41e-06	1.42e-05	7.15e-06	1.07e-05	7.34e-06	5.68e-06	5.15e-06	5.93e-06	7.63e-06	7.78e-06	5.16e-06	1.62e-05	6.11e-06	6.65e-06	8.36e-06	1.59e-05	7.67e-06	8.54e-06	5.52e-05
k__Bacteria;p__Proteobacteria;c__Alphaproteobacteria;o__Rhizobiales;f__Xanthobacteraceae;g__Azorhizobium	9.75e-05	2.04e-05	2.94e-05	3.56e-05	0.000156714	4.25e-06	1.87e-05	0.000157238	0.000103284	0.000239873	0.000468247	0.00043716	0.000357777	0.000457879	0.0004248	0.000367324	0.000378799	0.000364239	0.000372823	0.000347098	0.000456625	0.000459501	0.000420393	0.00044849	0.000440676	0.000448653	0.000380592	0.000438842	0.000352739	0.000410464
k__Bacteria;p__Actinobacteria;c__Actinobacteria;o__Micromonosporales;f__Micromonosporaceae;g__Hamadaea	3.77e-05	1.95e-05	2.7e-05	3.25e-05	0.000121353	2.57e-05	1.49e-05	8.78e-05	1.78e-05	0.000145271	0.000474785	0.000589119	0.000379071	0.000482576	0.000441145	0.000478451	0.000477597	0.00041245	0.000380134	0.000386112	0.000442005	0.000523557	0.00040627	0.000383435	0.000341017	0.000494901	0.000408612	0.000435555	0.000290848	0.000336136
k__Bacteria;p__Proteobacteria;c__Gammaproteobacteria;o__Cellvibrionales;f__Microbulbiferaceae;g__Microbulbifer	4.18e-05	1.42e-05	2.86e-05	1.82e-05	8.97e-05	5.31e-06	1.59e-05	7.98e-05	3.87e-05	0.000172529	0.000397921	0.000373801	0.000335337	0.000417908	0.000444343	0.000368466	0.000526559	0.000445366	0.000526734	0.000416433	0.000441246	0.00038295	0.000390426	0.00044987	0.000442624	0.000399334	0.000332878	0.000470253	0.000483924	0.000517595
k__Bacteria;p__Proteobacteria;c__Betaproteobacteria;o__Nitrosomonadales;f__Nitrosomonadaceae;g__Nitrosovibrio	1.57e-05	7.97e-06	7.95e-06	3.03e-06	3.03e-05	2.78e-06	2.73e-06	2.29e-05	1.15e-05	6.54e-05	0.000433791	0.000460684	0.000500327	0.000418883	0.000414673	0.000587131	0.000506886	0.000343293	0.000643896	0.000308508	0.000403463	0.00036173	0.000369243	0.00044159	0.000416654	0.000452749	0.000452643	0.000417475	0.00037552	0.000588809
k__Bacteria;p__Proteobacteria;c__Alphaproteobacteria;o__Rhodospirillales;f__Rhodospirillaceae;g__Ferrovibrio	6.32e-05	1.33e-05	1.03e-05	7.11e-05	0.000486483	9e-05	1.24e-05	0.000168392	8.02e-05	0.000189526	0.000390854	0.000305291	0.000292113	0.000336503	0.000323886	0.000344152	0.000366121	0.000517682	0.000347139	0.000344553	0.000349351	0.000324249	0.000368382	0.000414385	0.000397664	0.000320662	0.000354493	0.000743456	0.000409693	0.000559535
k__Bacteria;p__Proteobacteria;c__Alphaproteobacteria;o__Sphingomonadales;f__Erythrobacteraceae;g__Croceicoccus	0.000102695	5.05e-05	2.15e-05	2.5e-05	0.000249135	1.68e-05	9.63e-06	0.00024523	8.55e-05	0.00043453	0.000360285	0.000349419	0.000507212	0.000307744	0.000305941	0.000408936	0.000304044	0.000514856	0.000400681	0.000319321	0.00035144	0.000347253	0.000324293	0.000415371	0.00039036	0.000325952	0.000426545	0.000381681	0.000578658	0.000359805
k__Bacteria;p__Proteobacteria;c__Gammaproteobacteria;o__Alteromonadales;f__Shewanellaceae;g__Shewanella	0.000214093	0.000233839	0.000286169	0.000198255	0.00014573	5.41e-05	0.000105502	0.000108285	0.000101122	0.000304331	0.000342615	0.000297221	0.000276557	0.000353727	0.000361906	0.000311679	0.000430821	0.000329827	0.000435652	0.000357911	0.00036473	0.000336544	0.000335487	0.000369635	0.000372018	0.000346772	0.000279399	0.000411083	0.000415578	0.000438077
k__Bacteria;p__Actinobacteria;c__Actinobacteria;o__Micrococcales;f__Bogoriellaceae;g__Georgenia	3.02e-05	5.31e-06	8.74e-06	1.59e-05	6.13e-05	5.72e-06	5.39e-06	6.44e-05	9.37e-06	0.000114164	0.000490334	0.000526619	0.00043836	0.000422295	0.000429242	0.000500155	0.000380547	0.000412616	0.000380529	0.000463292	0.000470485	0.000504122	0.000452426	0.000404331	0.0003876	0.000462476	0.000458247	0.000321416	0.000343436	0.000335098
k__Bacteria;p__Cyanobacteria;c__unclassified;o__Oscillatoriales;f__Microcoleaceae;g__Microcoleus	1.1e-05	9.74e-06	1.91e-05	9.08e-06	1.18e-05	5.72e-07	2.12e-06	9.14e-06	6.25e-06	2.98e-05	0.000153196	0.000103881	0.000117687	0.000150785	0.000132717	0.000189292	0.000177487	9.38e-05	0.000142847	0.000129976	0.000320871	0.000207638	0.0021619	0.000153374	0.000144944	0.000159563	0.00354557	0.000162717	0.0002506	0.000215301
k__Bacteria;p__Proteobacteria;c__Betaproteobacteria;o__Nitrosomonadales;f__Sterolibacteriaceae;g__Methyloversatilis	2.9e-05	7.97e-06	1.11e-05	1.51e-05	7.13e-05	2.04e-06	9.78e-06	6.03e-05	4.23e-05	0.000148799	0.00037018	0.000327613	0.000309198	0.000417583	0.000425155	0.000366508	0.000538362	0.000414611	0.000479514	0.000457567	0.000433461	0.000382554	0.000386293	0.000417934	0.000451551	0.000359059	0.000278919	0.000477375	0.000533285	0.000530468
k__Bacteria;p__Planctomycetes;c__Planctomycetia;o__Planctomycetales;f__Isosphaeraceae;g__Isosphaera	7.54e-06	4.43e-06	8.74e-06	5.3e-06	2.44e-05	8.17e-07	1.74e-06	2.03e-05	5.04e-06	4.55e-05	0.000410644	0.000384275	0.000388633	0.00044423	0.000452161	0.000446957	0.000497269	0.000376708	0.000433479	0.000402862	0.000453397	0.000464062	0.000397143	0.000472541	0.000441812	0.000462306	0.000373226	0.000419849	0.000431905	0.000469635
k__Bacteria;p__Chloroflexi;c__Anaerolineae;o__Anaerolineales;f__Anaerolineaceae;g__Anaerolinea	5.22e-06	3.54e-06	6.36e-06	1.51e-06	1.15e-05	5.72e-07	1.82e-06	1.24e-05	1.68e-06	2.98e-05	0.00043061	0.000370882	0.000297468	0.00051296	0.00059838	0.000455443	0.000750603	0.000245209	0.000619199	0.000366181	0.000346693	0.000330595	0.000330148	0.000382055	0.000375589	0.000409402	0.000284523	0.000507873	0.000405137	0.000650264
k__Bacteria;p__Actinobacteria;c__Actinobacteria;o__Micrococcales;f__Intrasporangiaceae;g__Intrasporangium	3.48e-05	1.15e-05	1.67e-05	9.08e-06	5.12e-05	4.9e-06	5.76e-06	4.79e-05	1.18e-05	7.6e-05	0.000447573	0.00049348	0.000462713	0.00044748	0.000437237	0.000504397	0.000415083	0.000286271	0.000374602	0.000383779	0.000476181	0.000481712	0.000436581	0.000438831	0.000413246	0.000474934	0.000454565	0.000337304	0.000348562	0.00034797
k__Bacteria;p__Proteobacteria;c__Betaproteobacteria;o__Burkholderiales;f__unclassified;g__Roseateles	3.48e-05	1.51e-05	1.75e-05	1.21e-05	0.00010019	2.78e-06	1.62e-05	8.16e-05	6.68e-05	0.000220632	0.000378308	0.000320401	0.000349872	0.000404584	0.000418582	0.000360307	0.000398034	0.000275465	0.000402064	0.000361728	0.000412006	0.000388305	0.000442437	0.000495212	0.000501381	0.000399675	0.000366342	0.000403413	0.000518097	0.00046839
k__Bacteria;p__Proteobacteria;c__Betaproteobacteria;o__Burkholderiales;f__Alcaligenaceae;g__Pigmentiphaga	4.29e-05	1.59e-05	8.74e-06	2.19e-05	0.000121353	1.01e-05	8.34e-06	8.24e-05	7.16e-05	0.000170605	0.000375658	0.000356631	0.000344007	0.000415308	0.000400282	0.000360634	0.000446996	0.000379534	0.000433676	0.000393745	0.00043441	0.00039366	0.000378371	0.000430354	0.000444896	0.000385681	0.000312543	0.000434276	0.000487911	0.000455932
k__Bacteria;p__Proteobacteria;c__Alphaproteobacteria;o__Rhizobiales;f__unclassified;g__Alsobacter	6.67e-05	1.24e-05	3.42e-05	2.04e-05	8.38e-05	2.86e-06	1.16e-05	9.17e-05	5.5e-05	0.00016355	0.000432377	0.000434928	0.000366958	0.000430419	0.000407922	0.000383479	0.000357596	0.000322679	0.000337853	0.000346038	0.000471054	0.000436893	0.000421598	0.00046781	0.000464211	0.000447117	0.000396923	0.000393004	0.000362611	0.000387003
k__Bacteria;p__Proteobacteria;c__Gammaproteobacteria;o__Xanthomonadales;f__Xanthomonadaceae;g__Vulcaniibacterium	2.32e-05	3.81e-05	3.97e-06	2.27e-06	7.31e-05	5.15e-06	5.76e-06	6e-05	1.44e-05	0.000124426	0.00048839	0.000475622	0.000582057	0.000410433	0.000451628	0.000376462	0.000311039	0.000298075	0.000385271	0.000294938	0.000388843	0.000431935	0.00043417	0.000388363	0.000529785	0.000353257	0.000627648	0.000380403	0.000335842	0.000293782
k__Bacteria;p__Actinobacteria;c__Nitriliruptoria;o__Nitriliruptorales;f__Nitriliruptoraceae;g__Nitriliruptor	2.49e-05	7.09e-06	1.03e-05	3.78e-06	2.3e-05	3.68e-06	6.37e-06	4.04e-05	5.76e-06	4.94e-05	0.000452874	0.000500176	0.000340564	0.000438056	0.000427643	0.000488406	0.000496832	0.000426913	0.000415302	0.000653697	0.000368717	0.000411508	0.000335487	0.000344204	0.000314235	0.000446093	0.000340563	0.000368167	0.000430197	0.000357521
k__Bacteria;p__Firmicutes;c__Bacilli;o__Bacillales;f__Paenibacillaceae;g__Brevibacillus	1.57e-05	6.2e-06	1.27e-05	6.05e-06	3.27e-05	3.43e-06	3.26e-06	3.1e-05	1.2e-05	7.6e-05	0.000385376	0.000377064	0.000290965	0.000446017	0.000458912	0.000404856	0.000627105	0.000400481	0.000464498	0.000485979	0.000415614	0.000412698	0.000367348	0.000419117	0.000379322	0.00040087	0.000295411	0.000388073	0.000428108	0.000480847
k__Bacteria;p__Proteobacteria;c__Alphaproteobacteria;o__Rhizobiales;f__Phyllobacteriaceae;g__Chelativorans	6.32e-05	2.39e-05	2.54e-05	1.74e-05	0.000138498	1.45e-05	1.27e-05	0.000210684	4.44e-05	0.000219991	0.000424073	0.000461027	0.000343624	0.000398247	0.000381627	0.000425091	0.000359564	0.000453678	0.000347336	0.000414312	0.00039283	0.000366093	0.000367176	0.000386392	0.000338582	0.000399163	0.000420941	0.000366706	0.000326919	0.000335721
k__Bacteria;p__Proteobacteria;c__Gammaproteobacteria;o__Xanthomonadales;f__Rhodanobacteraceae;g__Luteibacter	0.00167213	2.48e-05	1.11e-05	1.66e-05	0.000166894	1.21e-05	1.26e-05	7.31e-05	3.72e-05	0.000236987	0.000307099	0.000281939	0.00030244	0.000283859	0.000297236	0.00028557	0.000333334	0.000261667	0.00034457	0.000308084	0.000298657	0.000273678	0.00028761	0.000315422	0.000343938	0.000290456	0.000375628	0.000341139	0.000322173	0.000359389
k__Bacteria;p__Planctomycetes;c__Planctomycetia;o__Planctomycetales;f__Planctomycetaceae;g__Mariniblastus	1.16e-05	5.31e-06	1.67e-05	8.32e-06	2.63e-05	1.55e-06	1.52e-06	2.51e-05	1.01e-05	7.89e-05	0.000442802	0.000437675	0.000362622	0.000421157	0.000419648	0.000393433	0.000467979	0.000424253	0.000441184	0.000449298	0.000415044	0.000383942	0.000377509	0.000390729	0.000392307	0.000430222	0.000361218	0.000406335	0.00042564	0.000423544
k__Bacteria;p__Actinobacteria;c__Actinobacteria;o__Pseudonocardiales;f__Pseudonocardiaceae;g__Actinomycetospora	4.7e-05	3.19e-05	3.42e-05	4.16e-05	0.000121889	2.55e-05	1.51e-05	0.000148718	3.19e-05	0.000344417	0.000384492	0.000460512	0.000352805	0.000374525	0.000352135	0.000377278	0.000342514	0.000403639	0.000319873	0.000448662	0.000408779	0.000420036	0.000369932	0.000372198	0.000354489	0.000421007	0.000402367	0.000348261	0.000322173	0.000304163
k__Bacteria;p__Bacteroidetes;c__Cytophagia;o__Cytophagales;f__Cytophagaceae;g__Emticicia	2.61e-05	7.97e-06	1.27e-05	1.14e-05	0.00214497	2.04e-06	7.05e-06	4.48e-05	6.92e-05	0.0003736	0.00035357	0.000220641	0.000263169	0.000240151	0.000236118	0.000236941	0.000302296	0.000208469	0.000301499	0.000235993	0.000264102	0.000261779	0.000360459	0.000278754	0.000358384	0.000247109	0.00026659	0.000314658	0.000332045	0.00039157
k__Bacteria;p__Cyanobacteria;c__unclassified;o__Nostocales;f__Scytonemataceae;g__Scytonema	1.68e-05	7.09e-06	1.19e-05	1.06e-05	2.3e-05	8.17e-07	4.93e-06	2.83e-05	6.97e-06	4.78e-05	0.000365232	0.000322633	0.000312386	0.000447155	0.000408099	0.000399961	0.000574646	0.000283113	0.00048386	0.000428094	0.000412196	0.000378191	0.000427626	0.000382252	0.000414706	0.000407013	0.000416617	0.000403961	0.00041311	0.000507837
k__Bacteria;p__Chloroflexi;c__Caldilineae;o__Caldilineales;f__Caldilineaceae;g__Caldilinea	9.86e-06	7.97e-06	1.51e-05	6.81e-06	2.65e-05	1.96e-06	2.35e-06	1.78e-05	4.8e-06	4.91e-05	0.000405519	0.000411576	0.000341584	0.000458691	0.00048574	0.000438145	0.000568963	0.000259839	0.000531476	0.000381023	0.000362262	0.000371051	0.00034031	0.000403346	0.000372181	0.000411109	0.000332718	0.000412544	0.000373622	0.000537112
k__Bacteria;p__Planctomycetes;c__Planctomycetia;o__Planctomycetales;f__Planctomycetaceae;g__Rubinisphaera	1.04e-05	8.86e-06	1.99e-05	7.57e-06	3.67e-05	3.27e-06	1.44e-06	2.39e-05	8.89e-06	9.11e-05	0.000434851	0.000424626	0.000361985	0.000393535	0.000418226	0.000409262	0.000441094	0.000457336	0.000406214	0.000400742	0.000415044	0.000404964	0.000356843	0.000414583	0.000384516	0.000395921	0.000401887	0.000372185	0.000414439	0.000415031
k__Bacteria;p__Chloroflexi;c__Chloroflexia;o__Herpetosiphonales;f__Herpetosiphonaceae;g__Herpetosiphon	6.96e-06	4.43e-06	1.19e-05	6.05e-06	2.44e-05	1.23e-06	2.96e-06	2.79e-05	5.76e-06	5.03e-05	0.000403929	0.000375003	0.00036785	0.000468115	0.000456247	0.00042199	0.000466668	0.000274136	0.00045047	0.000368937	0.000391881	0.000374224	0.000424354	0.000438042	0.000399774	0.000414351	0.000408452	0.000379124	0.000404188	0.000492889
k__Bacteria;p__Proteobacteria;c__Alphaproteobacteria;o__Rhizobiales;f__Methylocystaceae;g__Methylopila	6.38e-05	1.06e-05	2.54e-05	1.36e-05	0.000121353	1.38e-05	1.69e-05	0.00013617	6.77e-05	0.00022897	0.000401809	0.000414152	0.000358415	0.000416608	0.000391754	0.000379073	0.000346449	0.000332321	0.000335679	0.000353247	0.000426626	0.000398419	0.000371482	0.000373775	0.000385166	0.000420495	0.000353853	0.000395378	0.000336222	0.000397384
k__Bacteria;p__Proteobacteria;c__Alphaproteobacteria;o__unclassified;f__unclassified;g__Micavibrio	8.99e-05	2.39e-05	3.18e-05	1.74e-05	0.000241366	5.72e-06	9.18e-06	0.000169941	8e-05	0.000454413	0.000366116	0.00027593	0.000387358	0.000332279	0.000296347	0.000393923	0.000341859	0.000476454	0.0003096	0.000316141	0.000325808	0.000284982	0.000328082	0.000334741	0.000334687	0.000316736	0.00049059	0.000517552	0.000351789	0.000335098
k__Bacteria;p__Proteobacteria;c__Alphaproteobacteria;o__Rhizobiales;f__Hyphomicrobiaceae;g__Prosthecomicrobium	6.56e-05	9.74e-06	2.62e-05	2.5e-05	8.22e-05	4.58e-06	1.49e-05	0.000105032	6.49e-05	0.000161626	0.000420362	0.000426858	0.000331766	0.000405884	0.000391932	0.000366835	0.000369618	0.000356925	0.000369465	0.000367029	0.00042036	0.000373233	0.000354432	0.000429565	0.000395391	0.000421178	0.000360417	0.000393369	0.000330147	0.000391778
k__Bacteria;p__Proteobacteria;c__Alphaproteobacteria;o__Rhodospirillales;f__Acetobacteraceae;g__Rhodopila	4.76e-05	1.42e-05	2.54e-05	1.36e-05	5.46e-05	2.94e-06	6.22e-06	5.03e-05	2.14e-05	6.96e-05	0.000380605	0.00037775	0.000317231	0.000404746	0.000388378	0.000342847	0.000450711	0.000364572	0.000436245	0.000371694	0.000450359	0.000414285	0.000382159	0.00045953	0.000442624	0.000396945	0.00030806	0.000410535	0.000369635	0.000460085
k__Bacteria;p__Actinobacteria;c__Actinobacteria;o__Micrococcales;f__Intrasporangiaceae;g__Janibacter	4.87e-05	8.95e-05	1.43e-05	1.06e-05	6.21e-05	6.13e-06	4.32e-06	5.5e-05	1.15e-05	7.73e-05	0.000415414	0.000461199	0.000433387	0.000375012	0.000391754	0.000507008	0.000334864	0.000268649	0.000308809	0.000318049	0.000432322	0.000434315	0.00039852	0.000372592	0.000375752	0.00045309	0.000450722	0.000332921	0.000391468	0.000380151
k__Bacteria;p__Proteobacteria;c__Alphaproteobacteria;o__Rhodobacterales;f__Rhodobacteraceae;g__Stappia	5.28e-05	1.06e-05	1.43e-05	1.51e-05	8.44e-05	3.92e-06	1.49e-05	9.29e-05	6.03e-05	0.000137895	0.000414001	0.000420505	0.000315063	0.000407834	0.000410409	0.000399634	0.000393225	0.000401478	0.000374009	0.000391837	0.000424538	0.000365499	0.000326015	0.000398417	0.000370882	0.000418276	0.000355294	0.000391177	0.000355966	0.000389702
k__Bacteria;p__Acidobacteria;c__Acidobacteriia;o__Acidobacteriales;f__Acidobacteriaceae;g__Acidipila	1.39e-05	3.54e-06	1.03e-05	4.54e-06	3.38e-05	1.72e-06	4.85e-06	3.72e-05	9.37e-06	9.62e-05	0.000382902	0.000309069	0.000287395	0.000416608	0.000422668	0.00037173	0.00051869	0.00032218	0.000497888	0.000438484	0.000416563	0.000384934	0.000369587	0.000401966	0.000409188	0.000407013	0.000287405	0.000429528	0.000422033	0.000498287
k__Bacteria;p__Proteobacteria;c__Gammaproteobacteria;o__Chromatiales;f__Chromatiaceae;g__Nitrosococcus	1.86e-05	7.09e-06	1.83e-05	1.29e-05	4.34e-05	1.96e-06	5.08e-06	3.75e-05	1.37e-05	0.000111278	0.000380075	0.000338087	0.0002953	0.000426682	0.000432262	0.000383969	0.000538143	0.000397156	0.000467857	0.000472833	0.000389602	0.000337734	0.00033256	0.000354455	0.000353515	0.000373906	0.000268992	0.000418023	0.000429248	0.000435793
k__Bacteria;p__Chloroflexi;c__Ardenticatenia;o__Ardenticatenales;f__Ardenticatenaceae;g__Candidatus Promineofilum	3.48e-06	1.77e-06	4.77e-06	1.51e-06	1.31e-05	1.23e-06	1.52e-06	9.29e-06	1.68e-06	3.21e-05	0.00042902	0.000409001	0.000293388	0.000481926	0.000437414	0.000354433	0.00055257	0.000204812	0.000557951	0.000287729	0.000414475	0.000377199	0.000360632	0.000432128	0.000383543	0.000331925	0.000325512	0.000416927	0.000303188	0.000647773
k__Bacteria;p__Acidobacteria;c__Acidobacteriia;o__Acidobacteriales;f__Acidobacteriaceae;g__Candidatus Koribacter	9.86e-06	3.54e-06	8.74e-06	3.78e-06	1.37e-05	1.88e-06	2.5e-06	2e-05	6e-06	5.77e-05	0.000362759	0.000304948	0.000278215	0.000431719	0.000429775	0.000350843	0.000538799	0.000294583	0.000474574	0.000495733	0.000401944	0.000381959	0.000364421	0.000434296	0.000411135	0.000383463	0.000264829	0.000410901	0.000418996	0.000490813
k__Bacteria;p__Proteobacteria;c__Alphaproteobacteria;o__Rhodospirillales;f__Acetobacteraceae;g__Acidiphilium	4.99e-05	1.51e-05	2.23e-05	1.21e-05	7.9e-05	3.11e-06	9.1e-06	6.82e-05	5.62e-05	0.000101978	0.000365056	0.000355944	0.000314553	0.000369163	0.000377718	0.000353454	0.000418143	0.000386516	0.000387642	0.000400742	0.000400615	0.00036411	0.000350126	0.000396051	0.000379809	0.000375271	0.000332557	0.000378942	0.000381026	0.000423129
k__Bacteria;p__Proteobacteria;c__Alphaproteobacteria;o__Rhizobiales;f__Rhizobiaceae;g__Shinella	8.3e-05	5.05e-05	2.31e-05	1.59e-05	0.000253153	2.95e-05	1.77e-05	0.000598745	0.000219298	0.00021967	0.000343852	0.000343753	0.000342604	0.000317493	0.000303276	0.000343173	0.000281094	0.000289929	0.000292411	0.000294726	0.000361313	0.000306995	0.000330837	0.00033415	0.000308392	0.000313494	0.000383154	0.000318676	0.000290658	0.000290667
k__Bacteria;p__Proteobacteria;c__Gammaproteobacteria;o__Xanthomonadales;f__Rhodanobacteraceae;g__Ahniella	3.31e-05	1.33e-05	1.27e-05	6.81e-06	0.000352271	4.33e-06	7.51e-06	4.48e-05	1.9e-05	0.000249173	0.000335547	0.000264597	0.000311366	0.000302219	0.000316779	0.000309721	0.000337706	0.000250196	0.000372231	0.000354307	0.000346313	0.000325438	0.000387154	0.000376338	0.000458206	0.000365544	0.000453444	0.000449251	0.00046437	0.000375791
k__Bacteria;p__Actinobacteria;c__Actinobacteria;o__Micrococcales;f__Intrasporangiaceae;g__Ornithinimicrobium	2.55e-05	1.42e-05	1.11e-05	6.05e-06	5.06e-05	5.88e-06	5.61e-06	4.06e-05	5.76e-06	6.93e-05	0.000415591	0.000447978	0.000408652	0.000395485	0.000404368	0.000452342	0.000370056	0.000344124	0.000340224	0.000400742	0.000388083	0.000403179	0.000381815	0.000352681	0.000333875	0.000413157	0.000412615	0.000305893	0.000344006	0.000322018
k__Bacteria;p__Proteobacteria;c__Gammaproteobacteria;o__Alteromonadales;f__Pseudoalteromonadaceae;g__Pseudoalteromonas	5.45e-05	2.83e-05	5.09e-05	3.1e-05	9.43e-05	2.71e-05	2.72e-05	7.23e-05	4.64e-05	0.000202674	0.000324239	0.000305634	0.00028408	0.000365425	0.000375764	0.000316901	0.000438908	0.000355429	0.000430318	0.000344341	0.000348022	0.000321472	0.000340137	0.00034381	0.000375427	0.00034882	0.000295571	0.000406518	0.000411781	0.000483546
k__Bacteria;p__Firmicutes;c__Bacilli;o__Bacillales;f__Paenibacillaceae;g__Cohnella	1.33e-05	8.86e-06	1.99e-05	9.84e-06	4.47e-05	2.29e-06	2.88e-06	3.41e-05	8.17e-06	7.25e-05	0.000379898	0.00035852	0.000269034	0.000398897	0.000391754	0.000341052	0.000478908	0.000437553	0.000412338	0.000481103	0.000408779	0.000364507	0.000343754	0.000363721	0.000335823	0.000333802	0.000268512	0.000348261	0.000393936	0.000425412
k__Bacteria;p__Proteobacteria;c__Alphaproteobacteria;o__Rhizobiales;f__Cohaesibacteraceae;g__Breoghania	4.18e-05	9.74e-06	2.54e-05	9.08e-06	8.84e-05	2.94e-06	1.27e-05	0.000103483	6.08e-05	0.000168681	0.000403222	0.000432696	0.000299635	0.000379562	0.0003898	0.000350679	0.000350383	0.000416606	0.000322442	0.00034837	0.000365869	0.000347848	0.000322743	0.000375352	0.000356761	0.000379879	0.000318467	0.000356662	0.00031344	0.000378075
k__Bacteria;p__Planctomycetes;c__Candidatus Brocadiae;o__Candidatus Brocadiales;f__Candidatus Brocadiaceae;g__Candidatus Brocadia	1.33e-05	2.66e-06	1.27e-05	7.57e-06	1.74e-05	6.54e-07	2.65e-06	2.14e-05	1.68e-05	4.17e-05	0.000364526	0.000311816	0.000282295	0.000456416	0.000415561	0.000334524	0.000574865	0.000253854	0.000465288	0.000396713	0.000385805	0.000370456	0.00033256	0.000404331	0.000392632	0.000345065	0.000268832	0.000375472	0.000389	0.000454064
k__Bacteria;p__Proteobacteria;c__Alphaproteobacteria;o__Rhizobiales;f__Beijerinckiaceae;g__Methylovirgula	5.69e-05	1.51e-05	2.07e-05	2.19e-05	0.000105547	4.41e-06	1.34e-05	0.00010937	4.9e-05	0.000155854	0.000374067	0.000391487	0.000303205	0.000385573	0.00036315	0.000324407	0.000343826	0.000317359	0.000332518	0.000352187	0.00037916	0.000376208	0.000341515	0.000390729	0.0003553	0.000382097	0.000317186	0.000358123	0.00032559	0.000375584
k__Bacteria;p__Acidobacteria;c__Acidobacteriia;o__Acidobacteriales;f__Acidobacteriaceae;g__Candidatus Sulfotelmatobacter	8.12e-06	1.15e-05	8.74e-06	5.3e-06	2.06e-05	1.55e-06	2.12e-06	1.91e-05	5.76e-06	4.84e-05	0.000327949	0.000270092	0.000256794	0.000432694	0.000412719	0.000340725	0.000524154	0.000261002	0.00046193	0.000467108	0.000374223	0.000351418	0.000325326	0.000380675	0.000368934	0.000361107	0.000246096	0.00041711	0.000403048	0.000502854
k__Bacteria;p__Proteobacteria;c__Alphaproteobacteria;o__Rhizobiales;f__Brucellaceae;g__Ochrobactrum	8.35e-05	2.57e-05	2.38e-05	2.42e-05	0.000222346	2.11e-05	5.93e-05	0.000222922	0.00104965	0.000183112	0.000292963	0.000307523	0.000274517	0.000294745	0.000278936	0.000304009	0.000273443	0.000302729	0.000276209	0.000292181	0.00028138	0.000274273	0.000275727	0.000290582	0.00027171	0.000282605	0.000266911	0.000295483	0.000254587	0.000294197
k__Bacteria;p__Proteobacteria;c__Betaproteobacteria;o__Burkholderiales;f__Alcaligenaceae;g__Candidimonas	3.48e-05	1.06e-05	7.15e-06	7.57e-06	7.07e-05	1.49e-05	2.15e-05	6.99e-05	7.78e-05	0.000320366	0.000344912	0.0003465	0.000399854	0.00034414	0.000348226	0.000344968	0.000409837	0.000344789	0.00040246	0.00031084	0.000351629	0.000286568	0.000294326	0.000349921	0.000367474	0.000306838	0.000306619	0.000353922	0.000362041	0.000380359
k__Bacteria;p__Proteobacteria;c__Deltaproteobacteria;o__Myxococcales;f__Nannocystaceae;g__Plesiocystis	1.22e-05	1.77e-06	1.03e-05	3.78e-06	1.98e-05	1.06e-06	3.11e-06	2.51e-05	4.8e-06	7.34e-05	0.000359578	0.000284343	0.000225173	0.000320255	0.000398505	0.000305641	0.000433225	0.00034695	0.000501049	0.000457779	0.000317454	0.000315721	0.000348404	0.000391517	0.00038338	0.000341482	0.000243214	0.000430258	0.00048886	0.000534413
k__Bacteria;p__Proteobacteria;c__Gammaproteobacteria;o__Aeromonadales;f__Aeromonadaceae;g__Aeromonas	3.42e-05	7.97e-06	1.11e-05	1.44e-05	7.9e-05	6.81e-05	5.2e-05	7.89e-05	8.21e-05	0.000184074	0.000266459	0.000255497	0.000221603	0.000284509	0.000299368	0.000257176	0.000394974	0.000259839	0.00111985	0.000306175	0.000281949	0.000324844	0.000258504	0.000468401	0.000310015	0.000269806	0.000240812	0.000318128	0.000357295	0.000417315
k__Bacteria;p__Bacteroidetes;c__Chitinophagia;o__Chitinophagales;f__Chitinophagaceae;g__Parafilimonas	3.25e-05	7.97e-06	1.35e-05	1.51e-05	4.88e-05	1.8e-06	6.3e-06	4.07e-05	3.19e-05	8.59e-05	0.000365586	0.000206217	0.000378433	0.000336828	0.000297413	0.00024869	0.000335301	0.000126678	0.00033074	0.000178956	0.000472004	0.000408533	0.00043417	0.000478061	0.000649571	0.000316736	0.000332397	0.00041017	0.000407984	0.000470466
k__Bacteria;p__Proteobacteria;c__Betaproteobacteria;o__Burkholderiales;f__unclassified;g__Mitsuaria	4.87e-05	1.42e-05	1.35e-05	1.51e-05	0.000102601	4.09e-06	2.37e-05	8.02e-05	5.84e-05	0.000186319	0.000320528	0.000255668	0.000314171	0.000335691	0.000342363	0.000306457	0.000354974	0.000226756	0.000339433	0.000308508	0.000346503	0.000320481	0.000379576	0.000393489	0.000424932	0.000353257	0.000333678	0.000361775	0.000420135	0.000369355
k__Bacteria;p__Proteobacteria;c__Alphaproteobacteria;o__Rhodobacterales;f__Rhodobacteraceae;g__Sulfitobacter	3.13e-05	1.95e-05	2.7e-05	1.59e-05	6.48e-05	2.61e-05	1.08e-05	8.64e-05	5.45e-05	0.000118654	0.000351804	0.00034444	0.000293515	0.000330167	0.000366525	0.000313963	0.000356066	0.000399649	0.000366106	0.000371482	0.000355237	0.000331785	0.000316543	0.000351301	0.000350106	0.000353257	0.000305338	0.000350635	0.000328818	0.000358767
k__Bacteria;p__Firmicutes;c__Bacilli;o__Bacillales;f__Thermoactinomycetaceae;g__Planifilum	0	8.86e-07	7.95e-07	1.51e-06	3.48e-06	0	8.34e-07	4.49e-06	3.36e-06	1.09e-05	0.000158497	0.000209308	0.000134135	0.000433994	0.000356398	0.000192392	0.000451149	0.000410289	0.000735768	0.00131503	0.000222521	0.000218546	0.000254543	0.000287231	0.000216361	0.000161269	0.00016828	0.000159247	0.000756926	0.000409218
k__Bacteria;p__Armatimonadetes;c__Armatimonadia;o__Capsulimonadales;f__Capsulimonadaceae;g__Capsulimonas	1.33e-05	8.86e-06	1.75e-05	8.32e-06	3.99e-05	9.81e-07	2.96e-06	2.48e-05	7.93e-06	6.73e-05	0.000312577	0.000267859	0.000312131	0.000381511	0.000373277	0.000382826	0.000420766	0.000253189	0.000378158	0.000423854	0.000319922	0.000330198	0.000303626	0.000351695	0.000367311	0.000376637	0.000284683	0.000365428	0.000417097	0.000417108
k__Bacteria;p__Chloroflexi;c__Chloroflexia;o__Chloroflexales;f__Chloroflexaceae;g__Chloroflexus	6.38e-06	3.54e-06	1.59e-05	0	2.06e-05	4.9e-07	3.41e-06	1.67e-05	3.6e-06	3.62e-05	0.000337138	0.000292242	0.000307286	0.000385573	0.000405079	0.000386253	0.000461203	0.000242716	0.000398903	0.000338829	0.000357705	0.000342692	0.000338243	0.000389546	0.000357897	0.000379538	0.000306619	0.000336938	0.000310213	0.000430603
k__Bacteria;p__Proteobacteria;c__Betaproteobacteria;o__Nitrosomonadales;f__Gallionellaceae;g__Sulfuriferula	1.8e-05	3.54e-06	6.36e-06	3.03e-06	3.72e-05	1.39e-06	3.87e-06	2.51e-05	1.61e-05	8.27e-05	0.000284835	0.000262537	0.000253096	0.000356489	0.000356043	0.000326039	0.000461859	0.000386516	0.00039594	0.000353459	0.000368717	0.000303822	0.000324121	0.000387575	0.000384192	0.000324245	0.000207508	0.00041784	0.000421274	0.000432679
k__Bacteria;p__Proteobacteria;c__Gammaproteobacteria;o__Chromatiales;f__Chromatiaceae;g__Thiocapsa	2.55e-05	2.66e-06	1.59e-05	6.05e-06	5.49e-05	1.39e-06	8.19e-06	4.57e-05	1.83e-05	0.000100696	0.000344736	0.000318684	0.000261001	0.000361038	0.000369013	0.000311352	0.000459892	0.000319188	0.000431306	0.000343705	0.000354857	0.000307987	0.000306899	0.000332967	0.00035319	0.000313323	0.000250739	0.000359766	0.000384064	0.000435378
k__Bacteria;p__Proteobacteria;c__Gammaproteobacteria;o__Oceanospirillales;f__Oceanospirillaceae;g__Marinobacterium	4.64e-05	1.24e-05	8.74e-06	9.08e-06	8.76e-05	1.82e-05	1.37e-05	7.05e-05	3.29e-05	0.000139178	0.000313107	0.000298595	0.000260746	0.000342028	0.000355688	0.000292586	0.000409618	0.000352436	0.000402064	0.00035982	0.000325998	0.000293906	0.000306726	0.000329616	0.000347834	0.000319467	0.000265149	0.000368715	0.000397543	0.000385342
k__Bacteria;p__Actinobacteria;c__Actinobacteria;o__Pseudonocardiales;f__Pseudonocardiaceae;g__Actinosynnema	0.000340575	0.000146149	0.000217807	0.000265601	0.000151088	8e-05	0.00011066	0.000385737	0.000254607	0.00042491	0.000236067	0.000310957	0.000199417	0.000234139	0.000249443	0.000305151	0.000222733	0.000182369	0.000192635	0.000333952	0.000221572	0.000248888	0.000276932	0.000239326	0.000196235	0.000268441	0.000267071	0.000213486	0.000198202	0.00018312
k__Bacteria;p__Actinobacteria;c__Actinobacteria;o__Micromonosporales;f__Micromonosporaceae;g__Pseudosporangium	2.96e-05	2.75e-05	1.11e-05	1.21e-05	0.000265208	9.23e-06	4.31e-05	0.000123312	0.00017198	0.000427154	0.000378661	0.000334653	0.000516265	0.00027216	0.000233098	0.000257176	0.000197378	0.000171896	0.000241831	0.000153088	0.000254229	0.000365499	0.000717302	0.000238538	0.000259049	0.000285848	0.000445438	0.000263342	0.00013802	0.000304163
k__Bacteria;p__Actinobacteria;c__Actinobacteria;o__Micromonosporales;f__Micromonosporaceae;g__Verrucosispora	3.31e-05	1.33e-05	1.19e-05	1.66e-05	0.000114923	7.84e-06	1.92e-05	0.000113398	3.12e-05	0.000150402	0.000353747	0.000395779	0.000302058	0.000351452	0.000345383	0.000333872	0.000355192	0.000380531	0.000317107	0.000301087	0.000345554	0.000372043	0.000360459	0.000301031	0.000274144	0.000363667	0.000347128	0.000298405	0.000221933	0.000292951
k__Bacteria;p__Actinobacteria;c__Actinobacteria;o__Streptosporangiales;f__Streptosporangiaceae;g__Microtetraspora	0.000125322	1.51e-05	1.27e-05	1.66e-05	0.00080125	1.45e-05	1.15e-05	0.000185278	1.73e-05	0.000155533	0.000284659	0.00033843	0.000269417	0.000359576	0.000295104	0.000326039	0.000293115	0.000300734	0.000260008	0.000365757	0.000289734	0.000274074	0.000345304	0.000266137	0.000227723	0.000271513	0.000260826	0.000255854	0.000244525	0.000235856
k__Bacteria;p__Actinobacteria;c__Actinobacteria;o__Catenulisporales;f__Catenulisporaceae;g__Catenulispora	3.95e-05	1.77e-05	1.75e-05	1.89e-05	0.000189664	6.37e-06	7.36e-06	6.65e-05	1.35e-05	0.000101658	0.000345266	0.000371913	0.000289052	0.00034934	0.000330282	0.000381847	0.000367433	0.000305389	0.000304858	0.00047665	0.000352009	0.000335949	0.000315165	0.000300045	0.000274307	0.000352915	0.000277958	0.000285074	0.000305276	0.00026949
k__Bacteria;p__Proteobacteria;c__Gammaproteobacteria;o__Nevskiales;f__Sinobacteraceae;g__Sinimarinibacterium	2.09e-05	6.2e-06	6.36e-06	3.78e-06	5.41e-05	1.88e-06	5.84e-06	4.15e-05	2.38e-05	0.000134047	0.000295791	0.00025378	0.00020796	0.000314406	0.000377008	0.000252607	0.000461859	0.000355927	0.000482082	0.0002608	0.000309479	0.00030521	0.000306554	0.000328827	0.000355625	0.000357864	0.000170522	0.000494724	0.000464749	0.000402367
k__Bacteria;p__Proteobacteria;c__Alphaproteobacteria;o__Sneathiellales;f__Sneathiellaceae;g__Oceanibacterium	2.49e-05	1.68e-05	1.67e-05	9.08e-06	5.84e-05	3.76e-06	5.69e-06	4.65e-05	2.47e-05	9.97e-05	0.000315227	0.000311816	0.000241621	0.000319118	0.000329216	0.000294055	0.000401531	0.000549601	0.000366303	0.000350278	0.000324479	0.00029113	0.00028141	0.000329616	0.000330629	0.000324587	0.000271394	0.000313563	0.000402859	0.000384511
k__Bacteria;p__Actinobacteria;c__Actinobacteria;o__Micromonosporales;f__Micromonosporaceae;g__Catenuloplanes	2.78e-05	1.24e-05	2.7e-05	2.88e-05	0.000152428	1.03e-05	2.14e-05	0.000107201	3.89e-05	0.000221915	0.000311517	0.000371569	0.000282422	0.000795357	0.000290484	0.000287528	0.000266449	0.000273803	0.00025013	0.000233236	0.000282329	0.000324645	0.000541636	0.000234004	0.000233891	0.000316907	0.000360417	0.000278864	0.00017504	0.000255995
k__Bacteria;p__Proteobacteria;c__Alphaproteobacteria;o__Rhodobacterales;f__Rhodobacteraceae;g__Ruegeria	4.35e-05	4.43e-06	2.23e-05	1.51e-05	6.72e-05	3.27e-06	1.05e-05	6.2e-05	3.89e-05	0.00011673	0.000321058	0.000334481	0.000270947	0.000335204	0.000355333	0.000306946	0.000374864	0.000338804	0.000360771	0.000322926	0.000321441	0.000336346	0.00029691	0.000355244	0.000336472	0.000351721	0.000316066	0.000325068	0.000306985	0.000362088
k__Bacteria;p__Proteobacteria;c__Alphaproteobacteria;o__Rhodobacterales;f__Rhodobacteraceae;g__Mangrovicoccus	0.000937017	0.00123474	0.00141733	0.000967815	0.000532827	9.68e-05	5.81e-05	0.000214557	0.000247881	0.00058397	4.03e-05	3.45e-05	3.43e-05	3.35e-05	3.84e-05	3.33e-05	4.72e-05	3.16e-05	2.85e-05	3.12e-05	3.87e-05	2.4e-05	3.25e-05	3.55e-05	4.04e-05	3.7e-05	3.12e-05	3.29e-05	2.96e-05	4.71e-05
k__Bacteria;p__Proteobacteria;c__Gammaproteobacteria;o__Salinisphaerales;f__Salinisphaeraceae;g__Salinisphaera	3.25e-05	1.77e-06	5.56e-06	1.29e-05	6.3e-05	3.6e-06	7.13e-06	4.91e-05	1.95e-05	0.000137574	0.000291727	0.000289323	0.000239708	0.000335366	0.000346094	0.000329955	0.000428635	0.000346119	0.000413326	0.000347946	0.000303024	0.000295294	0.000298115	0.000335727	0.000338258	0.000325099	0.000234247	0.000379489	0.000392986	0.000385757
k__Bacteria;p__Proteobacteria;c__Alphaproteobacteria;o__Rhizobiales;f__Xanthobacteraceae;g__Ancylobacter	7.77e-05	1.33e-05	1.75e-05	1.89e-05	0.00011412	4.66e-06	1.62e-05	0.000217655	9.49e-05	0.000166436	0.000323709	0.000301685	0.00023142	0.000306769	0.000294571	0.000269414	0.000286558	0.000248534	0.000268306	0.000255288	0.000300366	0.000307392	0.00026436	0.000308325	0.000291349	0.000297452	0.000261627	0.00077998	0.000258764	0.000309768
k__Bacteria;p__Proteobacteria;c__Deltaproteobacteria;o__Desulfobacterales;f__Desulfobulbaceae;g__Desulfobulbus	1.57e-05	7.09e-06	1.11e-05	4.54e-06	2.54e-05	1.72e-06	3.64e-06	2.6e-05	1.18e-05	9.14e-05	0.000318408	0.000275758	0.000245956	0.000352752	0.000342896	0.000301888	0.000472351	0.000275632	0.000417475	0.000356851	0.000334921	0.000318299	0.00031241	0.00033001	0.000344425	0.00031503	0.000233126	0.000378576	0.000357675	0.000411502
k__Bacteria;p__Chloroflexi;c__Chloroflexia;o__Chloroflexales;f__Oscillochloridaceae;g__Candidatus Viridilinea	8.12e-06	2.66e-06	9.54e-06	6.05e-06	1.47e-05	1.14e-06	1.82e-06	1.83e-05	1.44e-06	3.34e-05	0.000324239	0.000307008	0.000297213	0.000400034	0.000371322	0.000338767	0.000363061	0.000218444	0.000392383	0.000288153	0.000330365	0.000337337	0.000349782	0.000394672	0.000382893	0.000347966	0.000339763	0.000290735	0.000282495	0.000438077
k__Eukaryota;p__Ascomycota;c__unclassified;o__unclassified;f__unclassified;g__Saitoella	0.00110063	0.00135963	0.00136964	0.0010904	0.000496126	0.000115705	5.39e-05	0.000222612	0.00031994	0.000497705	8.48e-06	1.18e-05	1.34e-05	7.64e-06	6.75e-06	6.53e-06	7.87e-06	6.65e-06	1.07e-05	9.75e-06	6.27e-06	1.11e-05	1.45e-05	7.89e-06	8.6e-06	6.48e-06	1.46e-05	9.68e-06	6.45e-06	5.17e-05
k__Bacteria;p__Proteobacteria;c__Betaproteobacteria;o__Burkholderiales;f__Burkholderiaceae;g__Chitinimonas	2.15e-05	6.2e-06	1.19e-05	7.57e-06	5.89e-05	1.55e-06	1.33e-05	5.42e-05	2.52e-05	0.000113523	0.000284835	0.000267859	0.000251694	0.000319443	0.000336145	0.000296503	0.000366777	0.000281949	0.000387246	0.000341161	0.000359224	0.000320282	0.000318954	0.000361552	0.000365201	0.000288066	0.000241132	0.000373646	0.000381216	0.000394269
k__Bacteria;p__Proteobacteria;c__Alphaproteobacteria;o__Rhodospirillales;f__Rhodospirillaceae;g__Caenispirillum	3.6e-05	2.66e-06	1.35e-05	6.81e-06	5.06e-05	3.51e-06	5.54e-06	4.49e-05	1.49e-05	0.000101016	0.00031187	0.00029207	0.000250674	0.00031928	0.000322642	0.000291444	0.000357378	0.000510201	0.000349114	0.000350914	0.000334542	0.000308582	0.000280377	0.000323504	0.000315859	0.00030462	0.000255062	0.000356114	0.000362421	0.000370601
k__Bacteria;p__Proteobacteria;c__Alphaproteobacteria;o__Rhodospirillales;f__Rhodospirillaceae;g__Candidatus Endolissoclinum	3.6e-05	2.13e-05	2.94e-05	2.35e-05	3.7e-05	3.6e-06	5.54e-06	3.95e-05	1.83e-05	9.2e-05	0.000299678	0.000270263	0.000230273	0.000347065	0.000338987	0.000276105	0.000393444	0.000489587	0.000350498	0.000365545	0.000314416	0.000300252	0.000268493	0.00033001	0.000323163	0.000303937	0.000247537	0.000341504	0.000348562	0.000391155
k__Bacteria;p__Proteobacteria;c__Gammaproteobacteria;o__Xanthomonadales;f__Rhodanobacteraceae;g__Rudaea	4.24e-05	2.83e-05	1.35e-05	1.21e-05	0.000209755	3.6e-06	6.9e-06	5.42e-05	2.31e-05	0.000223839	0.000296144	0.000244851	0.000296065	0.000290033	0.000299723	0.00028198	0.0003447	0.000248534	0.000348522	0.000309992	0.000284797	0.000266142	0.000307932	0.000306945	0.000364065	0.000302231	0.000364901	0.000348992	0.000346094	0.000351085
k__Bacteria;p__Proteobacteria;c__Gammaproteobacteria;o__Xanthomonadales;f__Xanthomonadaceae;g__Thermomonas	1.86e-05	1.33e-05	1.51e-05	6.81e-06	8.25e-05	1.63e-06	3.26e-06	3.5e-05	8.41e-06	0.00013533	0.000382372	0.000291555	0.000529781	0.00034349	0.000250509	0.000330608	0.000243061	0.000211129	0.000274826	0.000210337	0.000288974	0.000254838	0.000319987	0.000282302	0.000322189	0.000217756	0.000802653	0.000273934	0.000320654	0.00025994
k__Bacteria;p__Actinobacteria;c__Actinobacteria;o__Micrococcales;f__Microbacteriaceae;g__Salinibacterium	6.5e-05	2.57e-05	3.97e-06	4.54e-06	0.000264404	3.68e-06	1.52e-06	0.000129199	4.56e-06	0.000584611	0.000287663	0.000300827	0.00050683	0.000495412	0.000190281	0.000778544	0.000285902	0.000400481	0.000188881	8.82e-05	0.000128918	0.000308185	0.000298288	0.000190633	0.000196559	0.000123384	0.000411814	0.000147011	0.000128148	0.000180421
k__Bacteria;p__Proteobacteria;c__Gammaproteobacteria;o__Acidiferrobacterales;f__Acidiferrobacteraceae;g__Sulfuricaulis	1.39e-05	4.43e-06	7.15e-06	7.57e-06	2.46e-05	7.35e-07	2.81e-06	2.28e-05	9.85e-06	5.42e-05	0.000246846	0.000256527	0.00020949	0.000368188	0.000366703	0.000289486	0.000586231	0.000332653	0.000435059	0.000529234	0.000300936	0.000247896	0.000266943	0.000290188	0.000260997	0.000238576	0.000144423	0.000404509	0.000444246	0.000354407
k__Bacteria;p__Proteobacteria;c__Betaproteobacteria;o__Nitrosomonadales;f__Gallionellaceae;g__Candidatus Nitrotoga	1.97e-05	7.09e-06	6.36e-06	3.03e-06	2.28e-05	2.37e-06	3.49e-06	2.04e-05	7.69e-06	5.42e-05	0.000258861	0.00023472	0.000233716	0.000326104	0.000311449	0.000387559	0.000388635	0.000313701	0.000362352	0.000280307	0.00029467	0.000275661	0.00032326	0.000395066	0.000360332	0.00042442	0.000193418	0.00039209	0.000421464	0.000376622
k__Bacteria;p__Proteobacteria;c__Betaproteobacteria;o__Neisseriales;f__Chromobacteriaceae;g__Chromobacterium	3.08e-05	4.43e-06	8.74e-06	6.05e-06	7.15e-05	8.33e-06	1.02e-05	5.1e-05	3.05e-05	0.000154571	0.000290313	0.000270092	0.000255901	0.000341053	0.000310561	0.00029226	0.000379892	0.000282448	0.000374602	0.000326955	0.000335301	0.000275859	0.000292432	0.000326067	0.000343614	0.000280899	0.000233607	0.000342965	0.000366977	0.000401744
k__Bacteria;p__Bacteroidetes;c__Chitinophagia;o__Chitinophagales;f__Chitinophagaceae;g__Cnuella	2.78e-05	7.97e-06	1.27e-05	1.51e-05	4.55e-05	9.81e-07	5.84e-06	4.96e-05	3.36e-05	9.3e-05	0.000302505	0.000184068	0.00029683	0.000278659	0.000263834	0.000269414	0.00032481	0.000147292	0.000319873	0.000167082	0.000340997	0.000318696	0.000351848	0.000363721	0.000454148	0.000321003	0.000344086	0.000376202	0.00045089	0.000521955
k__Bacteria;p__Actinobacteria;c__Actinobacteria;o__Micrococcales;f__Micrococcaceae;g__Pseudarthrobacter	1.28e-05	3.54e-06	1.59e-05	4.54e-06	2.68e-05	2.48e-05	3.34e-06	3.02e-05	2.83e-05	0.000221915	0.000308336	0.000360408	0.000461056	0.000291333	0.000340053	0.000535729	0.000334864	0.000206474	0.000391	0.000269706	0.000242837	0.000349038	0.000314304	0.000255492	0.000232755	0.000312129	0.000272354	0.000225721	0.000368496	0.00022236
k__Eukaryota;p__Basidiomycota;c__Dacrymycetes;o__Dacrymycetales;f__Dacrymycetaceae;g__Calocera	0.00101418	0.00130206	0.00125596	0.00111235	0.000489965	0.000142016	6.84e-05	0.000242751	0.000324023	0.00053266	5.83e-06	6.87e-06	1.07e-05	5.36e-06	4.44e-06	7.18e-06	9.62e-06	8.64e-06	5.53e-06	7.63e-06	8.35e-06	7.93e-06	1.12e-05	7.49e-06	6.49e-06	6.14e-06	8.33e-06	7.12e-06	5.51e-06	2.43e-05
k__Bacteria;p__Proteobacteria;c__Deltaproteobacteria;o__Myxococcales;f__Vulgatibacteraceae;g__Vulgatibacter	5.8e-06	2.66e-06	7.15e-06	2.27e-06	1.96e-05	1.39e-06	3.03e-06	2.37e-05	2.88e-06	6.41e-05	0.000316464	0.000271465	0.000203369	0.000314081	0.000341475	0.000273984	0.000413771	0.000274136	0.000374602	0.000457779	0.000343845	0.000309176	0.000294843	0.000339078	0.000359358	0.000293527	0.000211031	0.000338217	0.000378368	0.000402159
k__Bacteria;p__Proteobacteria;c__Alphaproteobacteria;o__Rhodobacterales;f__Hyphomonadaceae;g__Robiginitomaculum	2.55e-05	4.43e-06	1.51e-05	7.57e-06	8.06e-05	2.86e-06	1.08e-05	6.88e-05	2.98e-05	0.000152005	0.000318054	0.00029207	0.000256156	0.000314893	0.000313226	0.000275452	0.000347542	0.00033897	0.000332913	0.000311688	0.000319732	0.000286568	0.000295532	0.000336318	0.000325273	0.000290967	0.000276037	0.000338765	0.000312301	0.000352953
k__Bacteria;p__Proteobacteria;c__Alphaproteobacteria;o__Rhodospirillales;f__Rhodospirillaceae;g__Rhodospirillum	3.37e-05	2.66e-06	1.51e-05	1.44e-05	6.32e-05	3.76e-06	7.36e-06	4.37e-05	2.23e-05	0.000109033	0.000300561	0.000291211	0.000238306	0.00029247	0.000315535	0.000280021	0.00034929	0.000458998	0.000338841	0.000325895	0.000286696	0.000281809	0.000269182	0.000324096	0.000340205	0.000309228	0.000250579	0.000329268	0.000352739	0.000371639
k__Bacteria;p__Proteobacteria;c__Alphaproteobacteria;o__Rhizobiales;f__Cohaesibacteraceae;g__Cohaesibacter	4.12e-05	2.21e-05	2.31e-05	2.57e-05	7.45e-05	2.61e-06	1.22e-05	8.24e-05	8.09e-05	0.000151364	0.000330777	0.000348561	0.000259471	0.000313106	0.000332058	0.000294218	0.000313225	0.000312039	0.000274629	0.000294938	0.000321631	0.000292716	0.000272971	0.000322124	0.000294109	0.00031759	0.000277638	0.000311737	0.000285342	0.000309976
k__Bacteria;p__Proteobacteria;c__Acidithiobacillia;o__Acidithiobacillales;f__Acidithiobacillaceae;g__Acidithiobacillus	2.61e-05	1.95e-05	2.94e-05	1.51e-05	5.28e-05	7.44e-06	6.83e-06	4.18e-05	1.97e-05	0.000116409	0.000303389	0.000271637	0.000242003	0.00032318	0.000308073	0.000284754	0.000404591	0.000306387	0.000358993	0.000348582	0.000304353	0.000290931	0.000249721	0.000311282	0.000312937	0.000291991	0.000230725	0.00035867	0.000348942	0.000380359
k__Bacteria;p__Proteobacteria;c__Alphaproteobacteria;o__Rhodobacterales;f__Rhodobacteraceae;g__Rubellimicrobium	1.51e-05	3.54e-06	1.35e-05	5.3e-06	3.83e-05	1.96e-06	4.1e-06	3.72e-05	2.4e-05	5.39e-05	0.000291373	0.00028503	0.000323351	0.000279959	0.000295992	0.000426886	0.000215957	0.000186858	0.00020449	0.000203552	0.000361882	0.000375811	0.000355809	0.000353667	0.000347834	0.000382268	0.000562321	0.000269916	0.000295974	0.000258071
k__Bacteria;p__Cyanobacteria;c__Gloeobacteria;o__Gloeobacterales;f__Gloeobacteraceae;g__Gloeobacter	1.16e-05	1.15e-05	1.83e-05	9.08e-06	2.33e-05	8.17e-07	2.43e-06	2.2e-05	1.01e-05	5.64e-05	0.000283422	0.00024983	0.000232568	0.000337478	0.000337033	0.000315758	0.000434755	0.00023324	0.000382702	0.000346462	0.000328466	0.000296286	0.000283649	0.000319167	0.000314885	0.000319296	0.000240332	0.00030224	0.0003254	0.00036894
k__Bacteria;p__Cyanobacteria;c__unclassified;o__Synechococcales;f__Pseudanabaenaceae;g__Pseudanabaena	1.68e-05	2.83e-05	1.11e-05	1.89e-05	2.57e-05	9.81e-07	4.7e-06	2.68e-05	1.06e-05	6.13e-05	0.000290843	0.000254466	0.000257814	0.000335041	0.000323175	0.000301725	0.000403498	0.000226424	0.000390803	0.000316353	0.00032296	0.00029113	0.000288299	0.000316802	0.000313099	0.000309569	0.000261467	0.000299501	0.00031344	0.000394062
k__Eukaryota;p__Chlorophyta;c__Ulvophyceae;o__Ulvales;f__Ulvaceae;g__Ulva	0.00109715	0.00154475	0.00137361	0.00110856	0.000279674	2.03e-05	2.09e-05	9.48e-05	0.00034516	0.000463071	1.59e-06	1.03e-06	3.7e-06	1.3e-06	1.6e-06	1.47e-06	1.09e-06	9.97e-07	1.19e-06	1.27e-06	1.71e-06	7.93e-07	5.68e-06	1.97e-06	1.3e-06	1.37e-06	8.17e-06	9.13e-07	5.7e-07	2.03e-05
k__Bacteria;p__Proteobacteria;c__Deltaproteobacteria;o__Myxococcales;f__Archangiaceae;g__Melittangium	1.22e-05	5.31e-06	9.54e-06	7.57e-06	2.63e-05	1.55e-06	3.87e-06	3.49e-05	7.93e-06	8.27e-05	0.000263985	0.000228196	0.00022479	0.000304169	0.000291195	0.000265988	0.000376613	0.000216117	0.000367094	0.000377631	0.000312517	0.000293311	0.000308104	0.000320745	0.000316345	0.000315371	0.000257784	0.000331825	0.000422983	0.000409633
k__Bacteria;p__Proteobacteria;c__Alphaproteobacteria;o__Rhodospirillales;f__Acetobacteraceae;g__Acidisphaera	4.06e-05	6.2e-06	1.11e-05	1.44e-05	5.28e-05	1.63e-06	6.22e-06	5.9e-05	1.92e-05	6.83e-05	0.000299148	0.000319371	0.000246848	0.000308394	0.00029919	0.000265824	0.000316503	0.000343127	0.000307821	0.000323986	0.000320682	0.000306202	0.000276415	0.000303593	0.000321377	0.000304279	0.000253461	0.000325433	0.00031382	0.000350046
k__Bacteria;p__Proteobacteria;c__Alphaproteobacteria;o__Rhizobiales;f__Rhodobiaceae;g__Anderseniella	2.61e-05	9.74e-06	8.74e-06	9.08e-06	3.62e-05	1.23e-06	7.05e-06	4.55e-05	2.76e-05	9.04e-05	0.000305156	0.000330532	0.000250164	0.000343003	0.000346094	0.000358512	0.000347323	0.000286936	0.000322047	0.000365969	0.00029448	0.000287957	0.000250582	0.000271854	0.000272034	0.00035667	0.000257144	0.000283978	0.000290658	0.000300633
k__Bacteria;p__Actinobacteria;c__Actinobacteria;o__Corynebacteriales;f__Mycobacteriaceae;g__Mycolicibacter	0.000211772	2.13e-05	2.15e-05	2.5e-05	0.000274048	1.27e-05	5.69e-06	0.000100695	9.85e-06	0.000102299	0.000324769	0.000335855	0.000260364	0.000278984	0.000289241	0.000278716	0.000272132	0.0002748	0.000254476	0.000272674	0.000293721	0.000295294	0.000276588	0.000258646	0.000240546	0.00029694	0.000329996	0.00024654	0.000245474	0.000243745
k__Bacteria;p__Deinococcus-Thermus;c__Deinococci;o__Thermales;f__Thermaceae;g__Thermus	5.8e-06	8.86e-07	3.97e-06	2.27e-06	1.45e-05	7.35e-07	1.74e-06	1.39e-05	4.32e-06	3.27e-05	0.000295614	0.000269748	0.000240728	0.000337966	0.000358708	0.000306131	0.000433444	0.000275798	0.00036255	0.000392049	0.000311378	0.000278239	0.000254027	0.000297482	0.000291999	0.000294381	0.000232326	0.000312284	0.000354827	0.000358974
k__Bacteria;p__Proteobacteria;c__Betaproteobacteria;o__Burkholderiales;f__Comamonadaceae;g__Xenophilus	6.09e-05	4.43e-06	1.99e-05	1.29e-05	0.000123228	2.08e-05	1.52e-05	8.66e-05	9.8e-05	0.000168681	0.000277944	0.000216691	0.000306011	0.000307744	0.000321221	0.000268109	0.000292241	0.000196999	0.000295769	0.000241929	0.000284417	0.000275066	0.000335832	0.000316013	0.000321053	0.000254277	0.000244014	0.000286717	0.000352739	0.000315582
k__Bacteria;p__Proteobacteria;c__Alphaproteobacteria;o__Rhodospirillales;f__Acetobacteraceae;g__Zavarzinia	3.08e-05	3.54e-06	9.54e-06	9.08e-06	7.21e-05	1.24e-05	9.03e-06	7.76e-05	2.64e-05	0.000120899	0.000295791	0.000260476	0.000238306	0.000286783	0.000293327	0.000250975	0.000348198	0.000388012	0.000336865	0.000302571	0.000291442	0.000267332	0.000260399	0.000293342	0.000307905	0.000288237	0.000259866	0.000303884	0.000317047	0.000340911
k__Bacteria;p__Actinobacteria;c__Actinobacteria;o__Micrococcales;f__Microbacteriaceae;g__Curtobacterium	6.61e-05	1.51e-05	6.36e-06	7.57e-06	0.00014198	5.88e-06	4.93e-06	7.7e-05	1.25e-05	0.000214219	0.000312577	0.000319543	0.000339927	0.000331791	0.000278048	0.000360144	0.000266886	0.000348779	0.000237682	0.000270342	0.000268659	0.000303822	0.000297426	0.000259237	0.00025207	0.000257178	0.000318788	0.000226269	0.000216997	0.00024333
k__Archaea;p__Euryarchaeota;c__Methanomicrobia;o__Methanosarcinales;f__Methanosarcinaceae;g__Methanosarcina	1.39e-05	6.2e-06	3.97e-06	1.06e-05	1.71e-05	4.74e-06	4.63e-06	1.77e-05	6.97e-06	2.95e-05	0.000424073	0.000324694	0.000220073	0.000290846	0.000341652	0.000278553	0.000375739	0.000249199	0.000355832	0.000286244	0.000301695	0.00026158	0.00022406	0.00028526	0.000279014	0.00029694	0.000422382	0.000303884	0.000244715	0.000349839
k__Bacteria;p__Actinobacteria;c__Actinobacteria;o__Micrococcales;f__Microbacteriaceae;g__Mycetocola	2.78e-05	7.97e-06	1.03e-05	2.27e-06	5.63e-05	3.35e-06	1.67e-06	8.72e-05	7.69e-06	0.000177019	0.000347916	0.000351651	0.000440273	0.000275247	0.000259393	0.000426886	0.000188634	0.000436888	0.000201921	0.000147999	0.000257077	0.00032762	0.00033101	0.000255492	0.000241033	0.000252229	0.000394041	0.000227913	0.000218706	0.000229212
k__Bacteria;p__Actinobacteria;c__Actinobacteria;o__Micromonosporales;f__Micromonosporaceae;g__Couchioplanes	2.26e-05	1.33e-05	2.15e-05	1.06e-05	0.000143587	7.19e-06	3.72e-05	7.93e-05	0.00014796	0.000336721	0.000316818	0.000332077	0.000418214	0.000265498	0.000224392	0.000235636	0.000205902	0.000174888	0.000239461	0.000149059	0.000259165	0.000329801	0.000511153	0.000216458	0.000240384	0.000269124	0.00037787	0.000228643	0.000127388	0.000244368
k__Eukaryota;p__Mucoromycota;c__Glomeromycetes;o__Glomerales;f__Glomeraceae;g__Glomus	0.00133735	0.00112756	0.00111527	0.000825556	0.000341288	0.000103857	4.27e-05	0.000161266	0.000229386	0.000340248	1.59e-05	2.73e-05	4.53e-05	2.13e-05	2.54e-05	9.63e-05	2.14e-05	1.85e-05	1.74e-05	2.48e-05	5.58e-05	1.96e-05	2.81e-05	2.23e-05	1.44e-05	1.64e-05	1.28e-05	1.88e-05	9.68e-06	3.32e-05
k__Bacteria;p__Proteobacteria;c__Gammaproteobacteria;o__Nevskiales;f__Sinobacteraceae;g__Fontimonas	1.45e-05	6.2e-06	8.74e-06	7.57e-06	4.71e-05	1.39e-06	4.47e-06	2.37e-05	8.65e-06	8.4e-05	0.000242428	0.000204329	0.000191257	0.000287596	0.000342008	0.000236778	0.000427979	0.000342628	0.000451261	0.000224119	0.000268469	0.000238972	0.000259538	0.000274417	0.00029281	0.000304279	0.000119926	0.000454182	0.000422223	0.000361258
k__Bacteria;p__Proteobacteria;c__Alphaproteobacteria;o__Rhizobiales;f__Rhodobiaceae;g__Lutibaculum	4.29e-05	6.2e-06	1.35e-05	7.57e-06	5.63e-05	2.12e-06	8.19e-06	7.28e-05	5.12e-05	0.000107109	0.000324592	0.000327269	0.00022785	0.000305794	0.000304875	0.000271536	0.000315192	0.000302231	0.000270875	0.000287729	0.000288974	0.000276454	0.000239732	0.000290188	0.000271872	0.000314347	0.00025186	0.000291283	0.000267307	0.000306654
k__Bacteria;p__Bacteroidetes;c__Bacteroidia;o__Marinilabiliales;f__Marinifilaceae;g__Marinifilum	0.000953263	0.0014358	0.00114468	0.0010397	0.000241634	1.49e-05	1.72e-05	7.89e-05	0.000310092	0.000394124	2.01e-05	1.77e-05	2.3e-05	1.9e-05	2.35e-05	2.27e-05	2.36e-05	1.63e-05	2.75e-05	1.95e-05	2.03e-05	1.96e-05	2.67e-05	1.97e-05	2.48e-05	2.03e-05	2.23e-05	2.81e-05	3.11e-05	3.49e-05
k__Bacteria;p__Proteobacteria;c__Alphaproteobacteria;o__Rhodobacterales;f__Rhodobacteraceae;g__Pseudovibrio	3.71e-05	1.77e-05	2.54e-05	1.89e-05	6.32e-05	4.09e-06	9.1e-06	6.96e-05	3.63e-05	0.000141102	0.00031187	0.000317654	0.000241748	0.000303194	0.000291373	0.000262724	0.000284591	0.000298407	0.00027206	0.00028158	0.000291442	0.00026277	0.000246621	0.000297088	0.000284208	0.000301377	0.0002525	0.000292926	0.000268066	0.000287138
k__Bacteria;p__Cyanobacteria;c__unclassified;o__Nostocales;f__Hapalosiphonaceae;g__Fischerella	1.51e-05	6.2e-06	1.51e-05	7.57e-06	1.82e-05	1.47e-06	3.79e-06	2.35e-05	1.01e-05	4.49e-05	0.000272113	0.000248113	0.00021918	0.000302707	0.000311094	0.000286549	0.000394099	0.000206474	0.000377763	0.000305115	0.000302265	0.000275264	0.000290882	0.0002825	0.000283234	0.000286018	0.000263548	0.000300962	0.000299771	0.000371431
k__Bacteria;p__Firmicutes;c__Bacilli;o__Bacillales;f__Thermoactinomycetaceae;g__Thermoactinomyces	0.000410199	0.000745803	0.000691576	0.000702215	0.000227168	4.79e-05	3.11e-05	0.000125171	0.000166215	0.000295994	0.000101247	0.000121739	7.19e-05	0.000137624	0.000141067	9.4e-05	0.000157377	0.000164415	0.0001466	0.000234296	0.000124931	0.000123552	0.000127788	0.000134054	0.000100796	9.04e-05	7.62e-05	9.31e-05	0.000139159	0.000124779
k__Bacteria;p__Chloroflexi;c__Chloroflexia;o__Chloroflexales;f__Oscillochloridaceae;g__Candidatus Chloroploca	1.74e-06	2.66e-06	4.77e-06	4.54e-06	1.1e-05	5.72e-07	3.49e-06	1.44e-05	2.16e-06	2.24e-05	0.00027388	0.000271637	0.000255519	0.000320093	0.000345383	0.000312168	0.000353006	0.000182535	0.000333704	0.000238113	0.000282898	0.000312944	0.000277965	0.000335136	0.000304984	0.000308374	0.000310782	0.000247271	0.000242626	0.00036541
k__Bacteria;p__Proteobacteria;c__Gammaproteobacteria;o__Cellvibrionales;f__Halieaceae;g__Halioglobus	2.26e-05	9.74e-06	7.95e-06	4.54e-06	3.24e-05	1.8e-06	6.45e-06	3.55e-05	1.35e-05	8.63e-05	0.000232887	0.000255325	0.000170983	0.00027346	0.000310561	0.000172484	0.000323935	0.00019783	0.000339631	0.00020652	0.000289734	0.00026634	0.000276071	0.000337501	0.000366987	0.000245061	0.000222559	0.000373828	0.000493796	0.000342365
k__Bacteria;p__Bacteroidetes;c__Chitinophagia;o__Chitinophagales;f__Chitinophagaceae;g__Sediminibacterium	3.08e-05	7.97e-06	9.54e-06	1.44e-05	6.8e-05	1.14e-06	6.37e-06	5.55e-05	4.64e-05	0.000139819	0.000259391	0.000154706	0.000243661	0.000240801	0.000225991	0.000251138	0.000271039	0.000136652	0.000295967	0.000172383	0.000288594	0.000271298	0.000290021	0.000312465	0.000395554	0.000266393	0.000263388	0.000326164	0.000358434	0.000447005
k__Bacteria;p__Proteobacteria;c__Betaproteobacteria;o__Rhodocyclales;f__Rhodocyclaceae;g__Propionivibrio	2.67e-05	1.77e-06	1.43e-05	7.57e-06	3.3e-05	6.29e-06	4.47e-06	3.47e-05	1.92e-05	7.22e-05	0.000248259	0.000203814	0.000207832	0.000270373	0.000283555	0.000238083	0.00037552	0.000257511	0.000351683	0.000287092	0.000305682	0.00024155	0.000276415	0.00031069	0.000296381	0.000255301	0.000177247	0.000320868	0.000350081	0.000352123
k__Bacteria;p__Proteobacteria;c__Alphaproteobacteria;o__Rhodobacterales;f__Hyphomonadaceae;g__Henriciella	2.78e-05	9.74e-06	1.83e-05	1.59e-05	6.51e-05	4.9e-06	7.28e-06	9.08e-05	3.12e-05	0.000123464	0.000319468	0.000264597	0.000242131	0.000256074	0.000267565	0.000205936	0.000290493	0.00032085	0.000269492	0.000253591	0.000277392	0.000260985	0.000245588	0.000281514	0.000281611	0.000256666	0.000258424	0.00027156	0.000287431	0.000303332
k__Bacteria;p__Proteobacteria;c__Alphaproteobacteria;o__Rhodospirillales;f__Geminicoccaceae;g__Arboricoccus	2.09e-05	7.97e-06	8.74e-06	6.05e-06	3.7e-05	1.23e-06	6.45e-06	3.02e-05	1.9e-05	4.01e-05	0.000248789	0.000321946	0.000222878	0.000263873	0.000282489	0.00026713	0.000257924	0.000253688	0.000275222	0.000404771	0.000306252	0.000270306	0.000249549	0.000281908	0.000300114	0.000304279	0.000276517	0.000259141	0.000306226	0.000278418
k__Bacteria;p__Actinobacteria;c__Actinobacteria;o__Micrococcales;f__Micrococcaceae;g__Kocuria	4e-05	2.57e-05	1.27e-05	4.54e-06	5.95e-05	4.58e-06	6.22e-06	3.86e-05	8.89e-06	7.82e-05	0.000301445	0.000303917	0.000326666	0.000244375	0.000279824	0.000280511	0.000245902	0.000217446	0.000209034	0.000254015	0.000298467	0.000332975	0.000348232	0.000267911	0.000266191	0.000270489	0.00040637	0.000226634	0.000228767	0.000218
k__Bacteria;p__unclassified;c__unclassified;o__unclassified;f__unclassified;g__Thermobaculum	1.16e-05	2.66e-06	4.77e-06	2.27e-06	2.68e-05	7.35e-07	1.06e-06	1.98e-05	2.4e-06	2.89e-05	0.000276707	0.000289494	0.000233716	0.000318143	0.000302743	0.000327997	0.000350383	0.000265657	0.000302882	0.000360456	0.000258026	0.000258011	0.000227677	0.000263969	0.000248175	0.000289773	0.000227362	0.000266629	0.000280216	0.000319111
k__Bacteria;p__Proteobacteria;c__Gammaproteobacteria;o__Alteromonadales;f__Idiomarinaceae;g__Idiomarina	4e-05	9.74e-06	2.07e-05	1.06e-05	6.05e-05	2.45e-06	6.3e-06	4.55e-05	1.78e-05	0.000125709	0.000261335	0.000223216	0.000204517	0.000267285	0.000281246	0.000234983	0.000347323	0.000291591	0.000338248	0.000282216	0.000267709	0.00024036	0.000234738	0.0002687	0.000291187	0.000244037	0.000206067	0.000309545	0.000311921	0.000318281
k__Bacteria;p__Actinobacteria;c__Actinobacteria;o__Micrococcales;f__Intrasporangiaceae;g__Terrabacter	2.96e-05	5.31e-06	3.18e-06	6.05e-06	2.79e-05	3.6e-06	2.96e-06	2.85e-05	3.6e-06	4.2e-05	0.000313637	0.000333794	0.000325264	0.000286946	0.000317845	0.000336646	0.000241968	0.000150783	0.000235707	0.000217334	0.000324479	0.000349237	0.000296221	0.000269883	0.000286155	0.000327829	0.000300374	0.000203807	0.000226299	0.000243122
k__Bacteria;p__Actinobacteria;c__Actinobacteria;o__Micromonosporales;f__Micromonosporaceae;g__Longispora	2.03e-05	7.97e-06	1.43e-05	6.05e-06	5.28e-05	4.49e-06	1.02e-05	4.99e-05	9.13e-06	7.82e-05	0.00033325	0.000377235	0.000248124	0.000352752	0.000297591	0.000279369	0.000254208	0.000220439	0.00019797	0.000224331	0.000286316	0.000330595	0.000251788	0.000282302	0.000245091	0.000339946	0.000230725	0.000290187	0.000194025	0.000235233
k__Bacteria;p__Cyanobacteria;c__unclassified;o__Oscillatoriales;f__Cyanothecaceae;g__Cyanothece	1.1e-05	1.15e-05	1.67e-05	1.51e-05	2.49e-05	1.39e-06	2.2e-06	2.28e-05	1.35e-05	5.77e-05	0.000256741	0.000233175	0.00022122	0.000288408	0.000287464	0.000265824	0.00037246	0.000211295	0.000337853	0.000294302	0.000284417	0.000265943	0.000257643	0.000283288	0.000269437	0.000271854	0.000218876	0.000287448	0.000270724	0.000365826
k__Bacteria;p__Proteobacteria;c__Alphaproteobacteria;o__Rhizobiales;f__Roseiarcaceae;g__Roseiarcus	3.77e-05	7.97e-06	6.36e-06	7.57e-06	4.8e-05	9.32e-06	5.16e-06	5.44e-05	2.52e-05	0.000105827	0.000264162	0.000273526	0.000225173	0.000306281	0.000289596	0.000247874	0.00030317	0.000235567	0.000260403	0.000273098	0.000312327	0.000278239	0.00026126	0.00028664	0.000277391	0.000287213	0.000222079	0.000259324	0.000256106	0.000286723
k__Bacteria;p__Proteobacteria;c__Alphaproteobacteria;o__Rhodobacterales;f__Rhodobacteraceae;g__Amaricoccus	6.96e-06	1.77e-06	2.38e-06	3.78e-06	1.42e-05	6.54e-07	2.58e-06	1.55e-05	6.97e-06	2.34e-05	0.000292963	0.000370195	0.000288797	0.00027216	0.000283555	0.00026664	0.000205465	0.000105731	0.000254081	0.000169202	0.000348402	0.000343882	0.000320504	0.000349921	0.000378998	0.000310593	0.000368103	0.000233026	0.000208074	0.000255995
k__Bacteria;p__Proteobacteria;c__Gammaproteobacteria;o__Chromatiales;f__Wenzhouxiangellaceae;g__Wenzhouxiangella	1.74e-05	7.09e-06	1.11e-05	5.3e-06	4.96e-05	1.31e-06	5.31e-06	3.64e-05	1.32e-05	0.000134688	0.000243842	0.00023369	0.000200182	0.000272322	0.00028018	0.000239715	0.000337924	0.000265823	0.000351485	0.000262709	0.000260494	0.000212596	0.000238699	0.000264757	0.000281611	0.000251375	0.000229764	0.000340226	0.000322173	0.000329907
k__Bacteria;p__Proteobacteria;c__Alphaproteobacteria;o__Micropepsales;f__Micropepsaceae;g__Rhizomicrobium	0.000222215	1.86e-05	5.56e-06	4.54e-06	0.000603817	3.68e-06	3.19e-06	0.000202783	1.1e-05	0.000126671	0.00027441	0.00015814	0.000403296	0.000256399	0.000202362	0.00027072	0.000162623	0.000131665	0.000167938	0.000141002	0.000181131	0.000215174	0.000235771	0.000227892	0.000272034	0.000192499	0.000318788	0.000225904	0.000212061	0.000244161
k__Bacteria;p__Bacteroidetes;c__Sphingobacteriia;o__Sphingobacteriales;f__Sphingobacteriaceae;g__Parapedobacter	4e-05	7.97e-06	1.43e-05	1.06e-05	7.29e-05	4.98e-06	8.12e-06	5.73e-05	3.94e-05	0.000103261	0.000248436	0.000217893	0.000250929	0.00024275	0.000239316	0.000268599	0.000315629	0.000237229	0.000274826	0.000266101	0.000245305	0.000237981	0.000263327	0.000273234	0.000291999	0.000249328	0.000242413	0.000282517	0.000340968	0.000332399
k__Bacteria;p__Proteobacteria;c__Alphaproteobacteria;o__Rhizobiales;f__Hyphomicrobiaceae;g__Arsenicitalea	2.73e-05	1.86e-05	1.35e-05	1.06e-05	9.86e-05	7.11e-06	5.54e-06	0.000126255	2.11e-05	0.000328062	0.000234123	0.00027198	0.000266357	0.000235439	0.000222971	0.000272352	0.000185793	0.000373882	0.000204885	0.000322502	0.000195751	0.000235997	0.000228538	0.000235778	0.000240708	0.000221681	0.000275717	0.000281056	0.000261232	0.00023378
k__Bacteria;p__Proteobacteria;c__Betaproteobacteria;o__Burkholderiales;f__Oxalobacteraceae;g__Herminiimonas	2.84e-05	4.43e-06	4.77e-06	1.74e-05	4.8e-05	1.29e-05	5.16e-06	0.000104103	4.4e-05	0.000174133	0.000230766	0.000224933	0.000281657	0.000269398	0.000252108	0.000230577	0.000279345	0.000226922	0.000275024	0.000255924	0.000261634	0.000257416	0.00024421	0.000284865	0.000272359	0.000215026	0.000217115	0.000314476	0.000328058	0.000289214
k__Bacteria;p__Actinobacteria;c__Actinobacteria;o__Pseudonocardiales;f__Pseudonocardiaceae;g__Actinoalloteichus	3.71e-05	6.64e-05	3.34e-05	3.78e-05	0.000165822	2.26e-05	1.66e-05	0.000262735	3.53e-05	0.000237308	0.000235184	0.000278162	0.000200054	0.000255749	0.000207692	0.000295034	0.000243061	0.000219275	0.000207651	0.000320806	0.000243217	0.000267926	0.000249377	0.000198716	0.000191365	0.00026298	0.000239211	0.000212755	0.000210162	0.000179798
k__Bacteria;p__Proteobacteria;c__Gammaproteobacteria;o__Chromatiales;f__Ectothiorhodospiraceae;g__Acidihalobacter	4.12e-05	1.06e-05	8.74e-06	1.44e-05	6.56e-05	2.7e-06	1.02e-05	6.13e-05	2.64e-05	0.000147516	0.000247906	0.00022665	0.000196229	0.000265336	0.000270763	0.000230414	0.000336176	0.000267985	0.000325998	0.000282216	0.000244166	0.000213984	0.000233704	0.000264757	0.000269762	0.000251717	0.000197421	0.000281969	0.000304327	0.000311014
k__Bacteria;p__Actinobacteria;c__Actinobacteria;o__Micrococcales;f__Promicromonosporaceae;g__Cellulosimicrobium	0.000164776	0.000308242	0.000262322	0.000279221	7.63e-05	2.02e-05	1.08e-05	7.16e-05	7.11e-05	0.000133085	0.000511891	0.000279192	0.000252969	0.000199205	0.000194189	0.000224213	0.000150601	0.000140476	0.000155886	0.000182348	0.000179422	0.000232428	0.000188582	0.000217641	0.000192989	0.000204616	0.000245615	0.000140071	0.000138779	0.000158414
k__Bacteria;p__Actinobacteria;c__Actinobacteria;o__Pseudonocardiales;f__Pseudonocardiaceae;g__Allokutzneria	6.21e-05	7.35e-05	4.21e-05	4.16e-05	0.000131532	3.18e-05	1.68e-05	0.000205572	3.55e-05	0.000331269	0.000217514	0.000253951	0.000192659	0.000217565	0.000249621	0.000304172	0.000268416	0.00019517	0.000169322	0.000342009	0.000217775	0.000265348	0.000263499	0.000188859	0.000191041	0.000258372	0.000245775	0.000184631	0.000183584	0.000167549
k__Eukaryota;p__Chlorophyta;c__Trebouxiophyceae;o__Chlorellales;f__Chlorellaceae;g__Auxenochlorella	0.000715382	0.0012312	0.00110732	0.00102987	0.00022315	5.39e-05	2.94e-05	0.000133691	0.00029616	0.000320366	2.07e-05	1.65e-05	1.79e-05	2.49e-05	1.6e-05	1.45e-05	2.12e-05	1.4e-05	1.96e-05	1.87e-05	2.66e-05	1.61e-05	2.1e-05	1.81e-05	2.74e-05	1.95e-05	2.07e-05	2.1e-05	2.22e-05	2.99e-05
k__Bacteria;p__Cyanobacteria;c__unclassified;o__Nostocales;f__Tolypothrichaceae;g__Tolypothrix	9.28e-06	1.51e-05	7.95e-06	9.08e-06	2.38e-05	8.17e-07	3.49e-06	2.26e-05	1.08e-05	5.64e-05	0.000258861	0.000225448	0.000234226	0.000277197	0.000270763	0.000251301	0.000326777	0.000193175	0.000301894	0.000263345	0.000265431	0.000237386	0.000294671	0.000262589	0.000270411	0.000254618	0.000333998	0.000276125	0.000269585	0.000306862
k__Bacteria;p__Actinobacteria;c__Actinobacteria;o__Propionibacteriales;f__Propionibacteriaceae;g__Tessaracoccus	3.6e-05	8.86e-06	9.54e-06	9.84e-06	4.21e-05	2.45e-06	2.73e-06	3.08e-05	1.15e-05	5.32e-05	0.000302682	0.000311988	0.0002953	0.000280447	0.000264545	0.000304662	0.000253771	0.000204479	0.000236102	0.00027331	0.000285557	0.000288353	0.000259021	0.000263771	0.000262945	0.000276632	0.000283562	0.000220973	0.000219845	0.000231703
k__Bacteria;p__Bacteroidetes;c__Saprospiria;o__Saprospirales;f__Haliscomenobacteraceae;g__Haliscomenobacter	1.51e-05	7.97e-06	1.11e-05	1.06e-05	3.46e-05	3.27e-07	3.87e-06	2.43e-05	2.31e-05	6.25e-05	0.000257271	0.000188704	0.000240983	0.00024795	0.000245535	0.000243958	0.000296394	0.000219275	0.000298535	0.000219666	0.000258596	0.000254838	0.000287438	0.000304382	0.000351242	0.000239259	0.000225281	0.00027923	0.000325211	0.000347555
k__Bacteria;p__Chloroflexi;c__Ktedonobacteria;o__Thermogemmatisporales;f__Thermogemmatisporaceae;g__Thermogemmatispora	8.7e-06	4.43e-06	9.54e-06	6.05e-06	1.85e-05	1.55e-06	2.65e-06	1.49e-05	3.12e-06	1.51e-05	0.000261865	0.000251891	0.000203114	0.000314081	0.000305586	0.000286712	0.000358252	0.000223099	0.000287274	0.000330559	0.000273595	0.000267728	0.000235427	0.000268109	0.0002584	0.000275779	0.000197261	0.000271194	0.000257435	0.000290667
k__Bacteria;p__Proteobacteria;c__Betaproteobacteria;o__Burkholderiales;f__unclassified;g__Paucibacter	2.32e-05	1.06e-05	1.75e-05	4.54e-06	5.17e-05	1.55e-06	5.16e-06	3.86e-05	4.52e-05	0.000159702	0.00023377	0.0001863	0.00022683	0.000252012	0.000267388	0.000211974	0.000255301	0.000133992	0.000265738	0.00021691	0.000275684	0.000260787	0.000289332	0.000301819	0.000335011	0.000250181	0.00023873	0.000285804	0.000334133	0.000293574
k__Bacteria;p__Proteobacteria;c__Gammaproteobacteria;o__Thiotrichales;f__Thiotrichaceae;g__Thiothrix	2.2e-05	4.43e-06	1.83e-05	8.32e-06	5.87e-05	2.21e-06	6.6e-06	5.19e-05	2.23e-05	0.000134688	0.000231826	0.00023472	0.00021	0.000249412	0.000278581	0.00022356	0.000323935	0.000255184	0.000318095	0.000266949	0.000242647	0.000222115	0.000242832	0.000251549	0.000262296	0.000250181	0.000187654	0.000285987	0.000289899	0.000298764
k__Bacteria;p__Proteobacteria;c__Alphaproteobacteria;o__Rhodobacterales;f__Rhodobacteraceae;g__Jannaschia	2.44e-05	8.86e-06	1.03e-05	1.59e-05	5.17e-05	3.02e-06	5.31e-06	4.43e-05	3.05e-05	7.15e-05	0.000261865	0.000262708	0.00022479	0.000266311	0.000260636	0.00024869	0.000260766	0.000262166	0.000262182	0.000252107	0.000261634	0.000266538	0.000239216	0.000285457	0.000271872	0.000274243	0.000239371	0.000246723	0.000265598	0.00026866
k__Bacteria;p__Proteobacteria;c__Alphaproteobacteria;o__Rhodospirillales;f__Acetobacteraceae;g__Acidocella	4.41e-05	3.54e-06	1.03e-05	1.21e-05	5.97e-05	3.36e-05	4.93e-06	4.9e-05	3e-05	8.59e-05	0.000251616	0.000239356	0.000218287	0.000251362	0.000243936	0.000232698	0.000271913	0.000305223	0.000275419	0.000245534	0.000264482	0.000246707	0.000236632	0.000269094	0.000276579	0.000261615	0.000211991	0.00027156	0.000257624	0.000276549
k__Bacteria;p__Proteobacteria;c__Deltaproteobacteria;o__Syntrophobacterales;f__Syntrophobacteraceae;g__Syntrophobacter	3.48e-06	3.54e-06	3.18e-06	7.57e-07	1.07e-05	4.9e-07	1.59e-06	1.16e-05	3.12e-06	3.24e-05	0.000258154	0.000212571	0.000190619	0.000304332	0.000302743	0.00024918	0.000409181	0.000182037	0.000340224	0.000302147	0.000292392	0.000234411	0.000229571	0.000273234	0.000258725	0.000256154	0.000183491	0.000269916	0.000272053	0.00034714
k__Bacteria;p__Proteobacteria;c__Betaproteobacteria;o__Burkholderiales;f__Comamonadaceae;g__Pseudacidovorax	3.42e-05	1.51e-05	7.15e-06	1.29e-05	9.75e-05	2.75e-05	8.49e-06	8.07e-05	6.65e-05	0.000146233	0.000242075	0.000188532	0.000253351	0.000253799	0.000239139	0.000225029	0.000231695	0.000157599	0.000234324	0.000208216	0.000262393	0.000257812	0.000285888	0.000257266	0.000295245	0.000234651	0.000206868	0.000251106	0.000315718	0.000272397
k__Bacteria;p__Proteobacteria;c__Deltaproteobacteria;o__Desulfuromonadales;f__Desulfuromonadaceae;g__Pelobacter	1.1e-05	7.97e-06	1.67e-05	7.57e-06	2.63e-05	1.31e-06	2.65e-06	2.06e-05	1.06e-05	4.91e-05	0.000242251	0.000216863	0.000191129	0.000262573	0.000255662	0.000238083	0.000365028	0.000213124	0.000324615	0.000258044	0.000270367	0.000253251	0.000244727	0.000269488	0.000276254	0.000250693	0.000179168	0.00027229	0.000291797	0.000336966
k__Eukaryota;p__Ascomycota;c__Eurotiomycetes;o__Eurotiales;f__Trichocomaceae;g__Talaromyces	0.000769921	0.00107087	0.00113355	0.000790748	0.000387364	0.000115868	5.7e-05	0.000201234	0.000231068	0.000326138	9.19e-06	1.51e-05	1.57e-05	1.28e-05	1.21e-05	1.57e-05	1.38e-05	1.3e-05	1.54e-05	1.72e-05	1.08e-05	1.63e-05	1.95e-05	1.12e-05	1.22e-05	1.26e-05	1.2e-05	1.08e-05	1.1e-05	1.54e-05
k__Bacteria;p__Bacteroidetes;c__Chitinophagia;o__Chitinophagales;f__Chitinophagaceae;g__Ferruginibacter	2.67e-05	6.2e-06	9.54e-06	4.54e-06	4.07e-05	8.17e-07	5.16e-06	3.61e-05	1.37e-05	7.22e-05	0.000262748	0.000172907	0.000259981	0.000236901	0.000227768	0.000244611	0.000260766	0.000115872	0.000251315	0.000129976	0.000284227	0.000273083	0.00026591	0.00032449	0.000356923	0.000278168	0.000241292	0.000283065	0.000305656	0.000360635
k__Bacteria;p__Proteobacteria;c__Betaproteobacteria;o__Burkholderiales;f__Comamonadaceae;g__Ottowia	5.4e-05	1.15e-05	9.54e-06	6.81e-06	8.01e-05	1.39e-05	1.01e-05	7.67e-05	4.83e-05	0.000136933	0.000243135	0.000195915	0.00023295	0.000246325	0.000251042	0.000228782	0.000253334	0.00019118	0.000255859	0.000221998	0.000239419	0.00022866	0.000273143	0.000262391	0.000272846	0.000226118	0.000212632	0.000257863	0.00031306	0.00028693
k__Bacteria;p__Proteobacteria;c__Alphaproteobacteria;o__Rhodobacterales;f__Rhodobacteraceae;g__Pannonibacter	4.7e-05	8.86e-06	9.54e-06	1.14e-05	6.62e-05	2.45e-06	1.07e-05	7.96e-05	4.78e-05	0.000118975	0.000269993	0.000270607	0.00021306	0.00025055	0.000273784	0.000253259	0.000250711	0.000252025	0.000226421	0.000252743	0.000249672	0.000244525	0.000219066	0.000250957	0.00023519	0.000276632	0.000216795	0.000249097	0.000223642	0.000236686
k__Bacteria;p__Actinobacteria;c__Actinobacteria;o__Micromonosporales;f__Micromonosporaceae;g__Jishengella	3.42e-05	1.06e-05	1.91e-05	1.21e-05	0.00010019	8.17e-06	1.48e-05	8.99e-05	3.43e-05	0.000120257	0.00025621	0.000303574	0.000215992	0.000263711	0.000260459	0.00026305	0.0002647	0.000301067	0.000227408	0.000246382	0.000247204	0.000282007	0.000239732	0.000200096	0.000186009	0.000262468	0.000241292	0.000228461	0.000168016	0.000202844
k__Bacteria;p__Proteobacteria;c__Alphaproteobacteria;o__Rhizobiales;f__Methylocystaceae;g__Methylosinus	3.08e-05	1.24e-05	1.03e-05	8.32e-06	5.79e-05	1.55e-06	1.03e-05	7.84e-05	3.75e-05	8.21e-05	0.000265752	0.000261163	0.000202349	0.000269235	0.000247311	0.000211974	0.000291367	0.000228419	0.000251117	0.000231116	0.000279291	0.000258606	0.000239732	0.00027284	0.000244604	0.000254789	0.000219997	0.000236496	0.000223642	0.000279248
k__Bacteria;p__Actinobacteria;c__Acidimicrobiia;o__Acidimicrobiales;f__Acidimicrobiaceae;g__Acidithrix	6.96e-06	2.66e-06	7.95e-06	6.05e-06	1.45e-05	7.35e-07	2.12e-06	1.38e-05	7.21e-07	2.41e-05	0.000276177	0.000289494	0.000215227	0.00024665	0.000278048	0.000294871	0.000288088	0.000334981	0.00021911	0.000392685	0.000262393	0.000249681	0.000219927	0.000216852	0.000203214	0.000288066	0.000217595	0.000236679	0.000256675	0.000215717
k__Bacteria;p__Proteobacteria;c__Gammaproteobacteria;o__Enterobacterales;f__Yersiniaceae;g__Serratia	0.000137507	3.37e-05	3.02e-05	2.57e-05	6.54e-05	0.000122814	0.000539342	0.000103483	0.000666061	0.000119616	0.000154786	0.000153504	0.00014357	0.000156147	0.000190636	0.000154371	0.000195629	0.000150949	0.000203897	0.000186801	0.000171638	0.000154291	0.000155688	0.000164611	0.000192664	0.00015615	0.000133215	0.000179518	0.000194215	0.000202637
k__Bacteria;p__Proteobacteria;c__Betaproteobacteria;o__Burkholderiales;f__Comamonadaceae;g__Schlegelella	1.45e-05	7.09e-06	7.15e-06	3.78e-06	3.67e-05	1.06e-06	2.5e-06	3.55e-05	1.51e-05	9.56e-05	0.000240308	0.000206217	0.000224918	0.000265498	0.000293505	0.000240531	0.000246777	0.000168737	0.000240448	0.000245958	0.000273405	0.000245715	0.000264188	0.000291174	0.000291187	0.000237552	0.000219357	0.000234122	0.000294835	0.000275303
k__Bacteria;p__Proteobacteria;c__Alphaproteobacteria;o__Rhizobiales;f__Salinarimonadaceae;g__Salinarimonas	2.55e-05	5.31e-06	7.95e-06	9.08e-06	4.47e-05	1.96e-06	8.49e-06	5.41e-05	2.09e-05	9.46e-05	0.000300208	0.000284515	0.000236011	0.000269073	0.000251931	0.000229598	0.00023541	0.00017921	0.000214369	0.000190618	0.00026695	0.000289146	0.000245071	0.000263771	0.000274794	0.00026827	0.000253941	0.000252567	0.000194025	0.000244368
k__Bacteria;p__Proteobacteria;c__Gammaproteobacteria;o__Thiotrichales;f__Piscirickettsiaceae;g__Methylophaga	3.54e-05	1.42e-05	1.51e-05	1.14e-05	7.13e-05	2.53e-06	7.74e-06	5.51e-05	1.92e-05	0.000152005	0.000218751	0.000216005	0.000189089	0.000240476	0.000250332	0.000218012	0.000300547	0.000247703	0.000300511	0.000264193	0.000227458	0.000190781	0.000216655	0.000240115	0.000241844	0.00023175	0.000187654	0.000274847	0.000291038	0.000275719
k__Bacteria;p__Proteobacteria;c__Betaproteobacteria;o__Burkholderiales;f__Alcaligenaceae;g__Derxia	2.73e-05	4.43e-06	1.91e-05	1.29e-05	8.44e-05	3.27e-06	8.72e-06	6.26e-05	3.77e-05	0.00015425	0.000227939	0.000228539	0.000202349	0.000236576	0.000242337	0.000203815	0.000281312	0.000218776	0.000274036	0.000214153	0.000273405	0.000224495	0.000221993	0.000250957	0.000275605	0.000207005	0.00018221	0.000252749	0.000258384	0.00030001
k__Bacteria;p__Proteobacteria;c__Alphaproteobacteria;o__Rhodospirillales;f__Rhodospirillaceae;g__Thalassobaculum	2.44e-05	4.43e-06	1.83e-05	6.81e-06	3.38e-05	3.19e-06	5.31e-06	3.61e-05	2.16e-05	6.64e-05	0.000237304	0.000230771	0.000179909	0.000245025	0.000260814	0.000219317	0.00029246	0.000380864	0.000265145	0.000279671	0.000247204	0.000222908	0.000209421	0.000230258	0.000239897	0.000247792	0.00018237	0.000251654	0.000278318	0.000261393
k__Bacteria;p__Proteobacteria;c__Alphaproteobacteria;o__Rhodospirillales;f__Acetobacteraceae;g__Oleomonas	3.13e-05	6.2e-06	1.43e-05	6.81e-06	6.19e-05	6.7e-06	7.28e-06	5.93e-05	3.1e-05	9.81e-05	0.000224052	0.000228539	0.000185391	0.000242425	0.000244646	0.000220786	0.000286995	0.000311873	0.000268109	0.000253591	0.000241318	0.00022866	0.000223027	0.000244649	0.0002373	0.00023704	0.000186853	0.00024234	0.000256865	0.000281532
k__Bacteria;p__Cyanobacteria;c__unclassified;o__Chroococcales;f__Microcystaceae;g__Microcystis	0.000278494	0.000443762	0.000387123	0.000315543	9.91e-05	2.08e-05	5.99e-06	3.64e-05	9.56e-05	0.000146233	0.000163798	0.000130496	0.000130819	0.000177594	0.000171448	0.000143927	0.000195847	0.000117867	0.000193228	0.000171747	0.000179232	0.000152308	0.000169294	0.000176636	0.000168317	0.000162976	0.000143783	0.000167282	0.000165548	0.00020928
k__Bacteria;p__Proteobacteria;c__Alphaproteobacteria;o__Rhodobacterales;f__Rhodobacteraceae;g__Defluviimonas	5.28e-05	5.67e-05	4.85e-05	3.63e-05	5.36e-05	2.94e-06	6.9e-06	5.73e-05	3.36e-05	8.82e-05	0.000228469	0.000243477	0.000193042	0.000237226	0.000247134	0.000215891	0.000238471	0.000219774	0.000225038	0.000242142	0.000248153	0.000242145	0.000228538	0.000241101	0.000242981	0.000246597	0.000232966	0.000222434	0.000236931	0.000248936
k__Bacteria;p__Proteobacteria;c__Gammaproteobacteria;o__Thiotrichales;f__Thiotrichaceae;g__Beggiatoa	3.08e-05	4.43e-06	1.43e-05	3.03e-06	4.77e-05	2.37e-06	5.99e-06	3.93e-05	1.56e-05	0.000119937	0.000222285	0.000207763	0.000193934	0.000263873	0.000256905	0.000214096	0.000316941	0.000220273	0.000294781	0.000267585	0.000229546	0.000207043	0.000212866	0.000262589	0.000244928	0.000222364	0.000178207	0.000255306	0.000272433	0.00029046
k__Bacteria;p__Proteobacteria;c__Betaproteobacteria;o__Burkholderiales;f__Comamonadaceae;g__Simplicispira	4.41e-05	1.06e-05	1.51e-05	6.81e-06	0.000104744	4.09e-06	9.18e-06	7.08e-05	7.61e-05	0.000171567	0.00021663	0.000179603	0.000206812	0.000213178	0.000252997	0.000189781	0.000258361	0.000172727	0.000272653	0.000226451	0.000229736	0.000224495	0.00025196	0.000252732	0.000239247	0.000203421	0.000220477	0.000234122	0.000294455	0.000260978
k__Bacteria;p__Actinobacteria;c__Actinobacteria;o__Micrococcales;f__Brevibacteriaceae;g__Brevibacterium	3.02e-05	2.75e-05	5.56e-06	1.44e-05	5.76e-05	4.9e-06	4.25e-06	4.99e-05	1.03e-05	9.01e-05	0.000236774	0.000265627	0.000231165	0.000253474	0.000249799	0.000260766	0.000245246	0.000291092	0.000244795	0.000275007	0.000237331	0.000235799	0.000220271	0.000241101	0.000212953	0.000243355	0.000232966	0.00020892	0.000209783	0.00021634
k__Bacteria;p__Actinobacteria;c__Actinobacteria;o__Streptosporangiales;f__Streptosporangiaceae;g__Thermoactinospora	6.44e-05	8.86e-06	1.67e-05	1.29e-05	0.000582118	8.82e-06	8.12e-06	0.000151197	8.65e-06	7.34e-05	0.000204792	0.000265799	0.000188706	0.000258511	0.000215687	0.00022356	0.000219235	0.000242549	0.000194216	0.000277127	0.000206003	0.000195342	0.000199432	0.000180382	0.000166694	0.000207688	0.000183011	0.000183901	0.000176749	0.000164227
k__Bacteria;p__Proteobacteria;c__Alphaproteobacteria;o__Sphingomonadales;f__Sphingomonadaceae;g__Blastomonas	5.8e-05	1.95e-05	1.03e-05	1.51e-05	0.000125371	6.54e-06	7.51e-06	0.000119129	4.64e-05	0.00021486	0.000219104	0.000204157	0.00029938	0.000182307	0.000187083	0.000213769	0.000169836	0.000290427	0.000192043	0.000168778	0.000227458	0.000207043	0.00020081	0.000326856	0.000217011	0.000190963	0.000257144	0.00022353	0.000268636	0.000210941
k__Bacteria;p__Bacteroidetes;c__Sphingobacteriia;o__Sphingobacteriales;f__Sphingobacteriaceae;g__Solitalea	4.12e-05	4.43e-06	7.15e-06	1.14e-05	3.86e-05	1.14e-06	6.9e-06	3.07e-05	1.68e-05	7.02e-05	0.000231296	0.000167412	0.000193297	0.000226015	0.000240915	0.000185375	0.000292678	0.000231245	0.000247364	0.000172171	0.000268279	0.000227668	0.000246449	0.000256872	0.000287292	0.000215196	0.000191337	0.000358123	0.000295974	0.000290667
k__Bacteria;p__Actinobacteria;c__Actinobacteria;o__Micrococcales;f__Microbacteriaceae;g__Agrococcus	2.15e-05	5.31e-06	3.18e-06	6.81e-06	4.15e-05	3.84e-06	1.67e-06	4.15e-05	9.37e-06	0.000100696	0.000262572	0.000239528	0.000368488	0.000207654	0.000185128	0.000543398	0.000184481	0.000201155	0.00016537	0.000159025	0.000273785	0.000225487	0.000373548	0.000166779	0.000170103	0.000193694	0.000370184	0.000140437	0.000174091	0.00017876
k__Bacteria;p__Bacteroidetes;c__unclassified;o__Bacteroidetes Order II. Incertae sedis;f__Rhodothermaceae;g__Rhodothermus	3.48e-06	8.86e-07	2.38e-06	3.78e-06	1.04e-05	4.09e-07	1.74e-06	1.18e-05	1.92e-06	2.89e-05	0.000243312	0.000204329	0.000183096	0.000249575	0.000274139	0.000252443	0.000348416	0.000209799	0.000297745	0.00029939	0.000239609	0.000213786	0.000192027	0.000239523	0.000237787	0.000238406	0.000198222	0.00024928	0.000259333	0.000289006
k__Bacteria;p__Proteobacteria;c__Alphaproteobacteria;o__Rhizobiales;f__Xanthobacteraceae;g__Pseudoxanthobacter	4.06e-05	2.66e-06	1.75e-05	1.21e-05	6.48e-05	1.88e-06	9.71e-06	7.27e-05	3.27e-05	9.94e-05	0.000270876	0.000253265	0.000186411	0.000244375	0.000249621	0.00021997	0.000240001	0.000224761	0.000215554	0.000226875	0.000228407	0.000225288	0.000208388	0.000234792	0.000231943	0.000251887	0.000214393	0.000240879	0.000198202	0.00023897
k__Bacteria;p__Proteobacteria;c__Betaproteobacteria;o__Burkholderiales;f__unclassified;g__Sphaerotilus	1.33e-05	3.54e-06	1.03e-05	7.57e-07	5.49e-05	9.81e-07	5.31e-06	3.44e-05	2.5e-05	0.00011673	0.000230413	0.000176856	0.000192149	0.000237551	0.000253352	0.000220786	0.000198908	0.000127343	0.000243412	0.000193586	0.00025328	0.000240757	0.000249032	0.00027284	0.000299465	0.000238235	0.000211191	0.000233026	0.000336601	0.000281947
k__Bacteria;p__Actinobacteria;c__Actinobacteria;o__Micrococcales;f__Sanguibacteraceae;g__Sanguibacter	2.44e-05	4.43e-06	7.95e-06	6.81e-06	4.21e-05	3.68e-06	5.08e-06	3.97e-05	8.05e-05	8.72e-05	0.000281125	0.000253951	0.000392841	0.000224065	0.000201651	0.000246243	0.000182951	0.000176883	0.000183152	0.000180652	0.000235622	0.000253053	0.000249377	0.00020601	0.000193476	0.00021878	0.000423182	0.000171848	0.000191177	0.000187688
k__Bacteria;p__Proteobacteria;c__Gammaproteobacteria;o__Enterobacterales;f__Erwiniaceae;g__Pantoea	4.64e-05	7.97e-06	1.03e-05	1.21e-05	6.38e-05	8.42e-06	0.00101331	4.74e-05	0.000613698	7.6e-05	0.000144891	0.000139424	0.000146885	0.000141361	0.000151905	0.000146212	0.000169181	0.000148954	0.000163197	0.000152664	0.000151892	0.000134856	0.000142944	0.000166976	0.000158579	0.000157686	0.000122808	0.000181161	0.00016346	0.000163189
k__Bacteria;p__Actinobacteria;c__Actinobacteria;o__Kineosporiales;f__Kineosporiaceae;g__Kineococcus	2.49e-05	4.43e-06	1.35e-05	6.81e-06	6.67e-05	8.66e-06	7.51e-06	6.55e-05	1.3e-05	0.000104544	0.000236244	0.000274041	0.000257941	0.000218865	0.000223859	0.000249506	0.000212678	0.000178878	0.000181571	0.000241929	0.000253849	0.000242939	0.000381126	0.000209361	0.000205	0.000235334	0.000255542	0.000177692	0.000191557	0.000187273
k__Bacteria;p__Proteobacteria;c__Alphaproteobacteria;o__Rhodospirillales;f__Rhodospirillaceae;g__Pararhodospirillum	2.49e-05	6.2e-06	1.51e-05	1.14e-05	5.33e-05	1.5e-05	2.03e-05	4.85e-05	6.68e-05	6.54e-05	0.000226172	0.00021154	0.000197632	0.00021919	0.000236118	0.000217196	0.000258361	0.000318689	0.000239263	0.000241929	0.000216446	0.000202284	0.000206321	0.000226709	0.000223503	0.000213149	0.000195339	0.000237592	0.000252688	0.000260978
k__Bacteria;p__Proteobacteria;c__Alphaproteobacteria;o__Kiloniellales;f__Kiloniellaceae;g__Kiloniella	2.67e-05	1.59e-05	1.51e-05	4.54e-06	3.51e-05	6.37e-06	4.63e-06	3.75e-05	2.28e-05	7.38e-05	0.000210446	0.000218065	0.000171748	0.000223577	0.000216042	0.000196472	0.000254427	0.00049873	0.000234719	0.000217334	0.000221382	0.000192368	0.000215621	0.000215867	0.000225776	0.000235334	0.000176286	0.000222617	0.000252309	0.000262431
k__Bacteria;p__Proteobacteria;c__Alphaproteobacteria;o__Rhodospirillales;f__Rhodospirillaceae;g__Indioceanicola	2.03e-05	6.2e-06	1.59e-05	1.44e-05	4.93e-05	3.27e-06	4.93e-06	4.32e-05	1.85e-05	8.18e-05	0.000215394	0.000229226	0.000183989	0.000234301	0.000212489	0.00019843	0.00026011	0.00031686	0.000245388	0.000241081	0.000232015	0.000217157	0.000198227	0.000233806	0.000257913	0.000221852	0.000215514	0.000234852	0.000227439	0.000251635
k__Bacteria;p__Proteobacteria;c__Alphaproteobacteria;o__Rhodospirillales;f__Rhodospirillaceae;g__Elstera	3.77e-05	7.09e-06	1.03e-05	6.81e-06	5.2e-05	3.51e-06	7.66e-06	4.24e-05	3.24e-05	8.08e-05	0.000213096	0.000200551	0.000172896	0.000215291	0.000214265	0.00019435	0.000240656	0.000376874	0.000248351	0.000227299	0.000223281	0.000219339	0.00021321	0.000242086	0.000233891	0.000217586	0.000186053	0.000231383	0.000243196	0.000267622
k__Bacteria;p__Proteobacteria;c__Betaproteobacteria;o__Nitrosomonadales;f__Methylophilaceae;g__Methylophilus	2.44e-05	7.97e-06	5.56e-06	5.3e-06	3.88e-05	1.63e-06	1.33e-05	0.000110764	0.000323543	0.00138729	0.000127398	0.000124143	0.000108506	0.000224715	0.000138757	0.000124672	0.00017858	0.000126179	0.000170112	0.000135701	0.000134994	0.000115817	0.000135883	0.00015436	0.000152898	0.000123213	9.4e-05	0.000151577	0.000205796	0.000183743
k__Bacteria;p__Proteobacteria;c__Gammaproteobacteria;o__Chromatiales;f__Chromatiaceae;g__Thiohalocapsa	2.15e-05	1.15e-05	7.15e-06	1.06e-05	3.54e-05	6.54e-07	3.94e-06	2.77e-05	9.61e-06	7.99e-05	0.000224405	0.000208965	0.000166903	0.000234301	0.000246245	0.000215891	0.000309946	0.000211129	0.000267121	0.000255712	0.000251191	0.000210811	0.000209421	0.000234989	0.000245253	0.000212978	0.000153069	0.000234487	0.000244335	0.000270321
k__Bacteria;p__Actinobacteria;c__Actinobacteria;o__Micrococcales;f__Dermabacteraceae;g__Brachybacterium	7.08e-05	6.02e-05	4.77e-05	4.69e-05	4.37e-05	6.29e-06	4.55e-06	4.65e-05	2.07e-05	9.72e-05	0.000226879	0.000250861	0.000239453	0.000241451	0.000228834	0.000231393	0.000216613	0.000208303	0.00019718	0.000239173	0.000226888	0.000232428	0.000201844	0.00020877	0.000205324	0.000224924	0.000220798	0.000185179	0.000196493	0.000186235
k__Bacteria;p__Proteobacteria;c__Gammaproteobacteria;o__Methylococcales;f__Methylococcaceae;g__Methylococcus	2.26e-05	2.66e-06	7.95e-06	9.84e-06	5.2e-05	1.47e-06	7.89e-06	3.41e-05	2.71e-05	0.000120578	0.000218574	0.000201925	0.000165756	0.000239013	0.000250509	0.000196309	0.000318252	0.000244378	0.000263565	0.00023048	0.000213978	0.000197921	0.000205288	0.000227104	0.00023519	0.000198984	0.000161075	0.000246175	0.000235222	0.000255372
k__Bacteria;p__Proteobacteria;c__Alphaproteobacteria;o__Rhodobacterales;f__Rhodobacteraceae;g__Tabrizicola	1.97e-05	5.31e-06	1.19e-05	7.57e-06	2.97e-05	2.04e-06	3.19e-06	3.61e-05	2.33e-05	6.64e-05	0.000256741	0.000166382	0.000157213	0.00017337	0.000152082	0.000165141	0.000149727	0.000188021	0.000143834	0.000152664	0.000270937	0.000212001	0.00042487	0.000192407	0.000198994	0.000191817	0.000727239	0.000173857	0.000182824	0.000289837
k__Bacteria;p__Proteobacteria;c__Alphaproteobacteria;o__Rhodospirillales;f__Rhodospirillaceae;g__Niveispirillum	3.95e-05	6.2e-06	1.03e-05	3.78e-06	9.4e-05	4.33e-06	8.65e-06	7.99e-05	3.36e-05	0.000136612	0.000203378	0.000198662	0.000191002	0.000202942	0.000203961	0.000194514	0.000239126	0.000285108	0.00023057	0.000215213	0.000203535	0.000209026	0.000198399	0.000225724	0.000210031	0.000200349	0.000188935	0.000229009	0.000240538	0.000248936
k__Bacteria;p__Proteobacteria;c__Alphaproteobacteria;o__Rhizobiales;f__unclassified;g__Mongoliimonas	3.83e-05	2.92e-05	3.5e-05	1.36e-05	5.52e-05	2.12e-06	8.19e-06	6.07e-05	3.36e-05	0.000123785	0.000225465	0.00024176	0.000185264	0.000209766	0.000241626	0.000212627	0.000224919	0.000209134	0.000206466	0.000223695	0.00022404	0.000201689	0.000198055	0.000230652	0.000207434	0.000229361	0.000195179	0.000212025	0.000205986	0.00022589
k__Bacteria;p__Armatimonadetes;c__Chthonomonadetes;o__Chthonomonadales;f__Chthonomonadaceae;g__Chthonomonas	5.8e-06	0	3.97e-06	7.57e-07	1.31e-05	2.45e-07	1.29e-06	1.18e-05	3.12e-06	2.28e-05	0.000212036	0.000180977	0.000191257	0.000260299	0.000235408	0.000260929	0.000264919	0.000141639	0.000236299	0.000276915	0.000205813	0.000213191	0.000194094	0.000253915	0.000238598	0.000276632	0.000187654	0.00024307	0.00027547	0.000297104
k__Bacteria;p__Proteobacteria;c__Gammaproteobacteria;o__Chromatiales;f__Ectothiorhodospiraceae;g__Ectothiorhodospira	2.67e-05	1.06e-05	1.11e-05	3.78e-06	5.2e-05	1.88e-06	5.54e-06	4.01e-05	1.63e-05	0.000128595	0.000204438	0.000206389	0.000150455	0.000232514	0.000236296	0.000196961	0.000282624	0.00023058	0.000274036	0.000217122	0.000217205	0.000186616	0.000207871	0.000204433	0.000238111	0.000214002	0.000160595	0.000236861	0.000251929	0.000255164
k__Bacteria;p__Proteobacteria;c__Gammaproteobacteria;o__Xanthomonadales;f__Rhodanobacteraceae;g__Mizugakiibacter	1.51e-05	1.77e-05	4.77e-06	7.57e-06	0.000162607	2.53e-06	3.19e-06	3.33e-05	1.18e-05	0.000134368	0.000204262	0.000179603	0.000225555	0.000192868	0.000190636	0.000185049	0.000218798	0.000169402	0.000223655	0.00021691	0.000218155	0.000182452	0.00020546	0.000203841	0.000239572	0.00019267	0.000332397	0.000251106	0.000239019	0.000235441
k__Bacteria;p__Actinobacteria;c__Actinobacteria;o__Pseudonocardiales;f__Pseudonocardiaceae;g__Thermocrispum	3.95e-05	1.95e-05	1.51e-05	2.27e-05	5.55e-05	1.67e-05	9.1e-06	0.000246314	1.71e-05	0.000104223	0.000199314	0.000227852	0.000172258	0.000213178	0.000213377	0.000247385	0.000211367	0.000202983	0.00019718	0.000385476	0.000191384	0.000242145	0.000186171	0.000165005	0.000155495	0.000201032	0.000174044	0.000162899	0.00023769	0.000156545
k__Bacteria;p__Proteobacteria;c__Gammaproteobacteria;o__Alteromonadales;f__Alteromonadaceae;g__Alteromonas	1.68e-05	1.06e-05	1.19e-05	9.08e-06	5.09e-05	8.91e-06	1.58e-05	4.71e-05	2.07e-05	0.000109995	0.000211506	0.000191451	0.000166903	0.000209116	0.000234697	0.000187986	0.000265793	0.000235733	0.000265936	0.00021691	0.00022518	0.000194152	0.000187205	0.000226315	0.000216524	0.000201373	0.000175005	0.000236861	0.000246044	0.000266791
k__Eukaryota;p__Ascomycota;c__Leotiomycetes;o__Helotiales;f__unclassified;g__Cadophora	0.00392097	2.75e-05	8.74e-06	1.74e-05	2.97e-05	2.44e-05	2.5e-05	2.68e-05	9.13e-05	6.41e-06	1.55e-05	4.26e-05	5.15e-05	1.49e-05	2.19e-05	2.37e-05	1.2e-05	3.06e-05	1.24e-05	3.92e-05	1.42e-05	1.8e-05	3.67e-05	1.44e-05	1.75e-05	2.92e-05	1.65e-05	3.34e-05	2.18e-05	1.52e-05
k__Bacteria;p__Proteobacteria;c__Gammaproteobacteria;o__unclassified;f__Candidatus Competibacteraceae;g__Candidatus Contendobacter	1.62e-05	2.66e-06	1.11e-05	2.27e-06	2.97e-05	8.17e-07	4.55e-06	2.32e-05	7.93e-06	7.79e-05	0.00021451	0.0001954	0.000159508	0.000240963	0.000239316	0.000189292	0.00030317	0.000184863	0.000280951	0.000237477	0.000232205	0.00020149	0.000192199	0.000233806	0.000245091	0.000215708	0.00016764	0.00024307	0.000241487	0.000258071
k__Bacteria;p__Actinobacteria;c__Actinobacteria;o__Micrococcales;f__Microbacteriaceae;g__Leucobacter	3.08e-05	9.74e-06	1.59e-05	9.08e-06	0.000109566	6.13e-06	3.87e-06	5.64e-05	5.91e-05	0.000179584	0.0002343	0.000231458	0.000233588	0.000248437	0.000202717	0.000251791	0.000216831	0.000218776	0.000205083	0.000197191	0.000197459	0.000216364	0.000199088	0.000191816	0.00019169	0.000198984	0.000217435	0.000162899	0.000184343	0.000170456
k__Bacteria;p__Bacteroidetes;c__Cytophagia;o__Cytophagales;f__Cyclobacteriaceae;g__Cyclobacterium	1.57e-05	9.74e-06	6.36e-06	3.78e-06	3.27e-05	1.55e-06	3.03e-06	2.22e-05	7.45e-06	5.39e-05	0.000221048	0.000173422	0.000201202	0.000209929	0.000194367	0.000237104	0.00026776	0.000232575	0.000237682	0.000277763	0.000212079	0.000202284	0.000194094	0.00020877	0.000238111	0.000205128	0.0001963	0.000214581	0.000291607	0.000273435
k__Bacteria;p__Proteobacteria;c__Alphaproteobacteria;o__Rhizobiales;f__Hyphomicrobiaceae;g__Dichotomicrobium	0.000111978	2.04e-05	1.99e-05	1.74e-05	9.62e-05	2.12e-06	3.14e-05	0.000139113	0.000166455	7.12e-05	0.000206735	0.000235579	0.000181949	0.000210741	0.000233098	0.000206589	0.000206121	0.000192011	0.000195204	0.000210973	0.000207902	0.000193954	0.000166538	0.000194379	0.000188444	0.000208882	0.000175005	0.000194493	0.000148841	0.000201599
k__Bacteria;p__Chloroflexi;c__Chloroflexia;o__Chloroflexales;f__Oscillochloridaceae;g__Oscillochloris	5.8e-06	2.66e-06	4.77e-06	2.27e-06	1.07e-05	4.9e-07	1.9e-06	1.02e-05	4.8e-06	2.05e-05	0.000196487	0.0001954	0.000214845	0.000246488	0.000260814	0.000235636	0.000270602	0.000125348	0.000256254	0.000171747	0.000217775	0.000227866	0.000236632	0.000269094	0.00028648	0.000233286	0.000240652	0.000206729	0.000170674	0.000306031
k__Bacteria;p__Acidobacteria;c__Acidobacteriia;o__Acidobacteriales;f__Acidobacteriaceae;g__Occallatibacter	3.48e-06	8.86e-07	8.74e-06	4.54e-06	9.91e-06	1.72e-06	1.97e-06	2.04e-05	4.32e-06	3.43e-05	0.000228292	0.000170675	0.000169453	0.00024795	0.000233276	0.000207242	0.000325028	0.000163251	0.000258428	0.000235781	0.000241318	0.000231634	0.000213555	0.000245832	0.000228535	0.000229532	0.000163797	0.00024161	0.000234843	0.000261601
k__Bacteria;p__Bacteroidetes;c__Flavobacteriia;o__Flavobacteriales;f__Flavobacteriaceae;g__Muricauda	3.89e-05	4.52e-05	4.05e-05	3.71e-05	3.83e-05	4.49e-06	4.78e-06	2.63e-05	2.11e-05	7.22e-05	0.000212213	0.000178916	0.000173533	0.000222765	0.000199875	0.000193861	0.00026164	0.000196334	0.000248747	0.000220726	0.000222332	0.000193359	0.00019306	0.000206996	0.000237624	0.000186526	0.000169721	0.000248367	0.000248512	0.000271359
k__Bacteria;p__Cyanobacteria;c__unclassified;o__Oscillatoriales;f__Microcoleaceae;g__Planktothrix	0.000313306	0.000460591	0.000350557	0.000314029	9.03e-05	6.54e-06	8.27e-06	4.31e-05	0.000105686	0.000157778	0.000122274	9.67e-05	0.000106721	0.000138761	0.000126676	0.000125324	0.000172241	0.000104567	0.000152923	0.000122979	0.000141259	0.000118792	0.000186516	0.000131097	0.00013131	0.000129869	0.000211031	0.000128201	0.000143336	0.000166926
k__Bacteria;p__Cyanobacteria;c__unclassified;o__Oscillatoriales;f__Oscillatoriaceae;g__Phormidium	1.68e-05	2.39e-05	1.59e-05	2.12e-05	1.5e-05	2.04e-06	1.9e-06	1.61e-05	9.61e-06	3.88e-05	0.000168569	0.000142687	0.000137067	0.000187993	0.000188859	0.000320654	0.000227542	0.000157266	0.000206268	0.00019083	0.000373844	0.000165397	0.000234566	0.000224541	0.000175297	0.000175434	0.000556557	0.000180248	0.00020048	0.000219454
k__Bacteria;p__Proteobacteria;c__Alphaproteobacteria;o__Rhodospirillales;f__Rhodospirillaceae;g__Fodinicurvata	2.32e-05	9.74e-06	1.43e-05	4.54e-06	3.62e-05	2.21e-06	5.01e-06	3.01e-05	1.59e-05	5.64e-05	0.000208149	0.000209652	0.000164608	0.00020083	0.000216397	0.000188639	0.000247214	0.000449522	0.000242424	0.00021691	0.000217585	0.000201887	0.000171016	0.000180776	0.000207921	0.000211101	0.000185572	0.00020125	0.00022611	0.000249143
k__Bacteria;p__Proteobacteria;c__Alphaproteobacteria;o__Rhizobiales;f__Bartonellaceae;g__Bartonella	3.37e-05	5.31e-06	1.11e-05	5.3e-06	4.77e-05	3.35e-06	6.45e-06	6.52e-05	3.65e-05	0.000105185	0.000235184	0.000215318	0.000179781	0.000239013	0.00021391	0.000228129	0.00021246	0.000199825	0.000215356	0.000204188	0.000212079	0.000215769	0.000189616	0.000213698	0.000203701	0.000236699	0.000180289	0.000229922	0.000194405	0.000239385
k__Bacteria;p__Proteobacteria;c__Alphaproteobacteria;o__Rhodospirillales;f__Rhodospirillaceae;g__Tistrella	2.67e-05	4.43e-06	6.36e-06	8.32e-06	5.52e-05	2.21e-06	5.99e-06	4.79e-05	3.41e-05	6.64e-05	0.000202141	0.000206389	0.000177996	0.000213503	0.000211423	0.000194514	0.000232569	0.000296745	0.00023867	0.000228359	0.000214927	0.000193558	0.000195988	0.000202264	0.000211817	0.00020564	0.000205427	0.000230287	0.00023788	0.0002207
k__Bacteria;p__Bacteroidetes;c__Flavobacteriia;o__Flavobacteriales;f__Flavobacteriaceae;g__Arenibacter	1.28e-05	5.31e-06	4.77e-06	9.08e-06	3.8e-05	1.39e-06	2.73e-06	2.31e-05	1.15e-05	7.44e-05	0.000209563	0.000169816	0.000202222	0.000207816	0.000197743	0.00021638	0.000260984	0.000210298	0.000271468	0.000230692	0.000214167	0.000196136	0.000214932	0.000220598	0.000236326	0.000196936	0.000187174	0.00020892	0.000273762	0.000269283
k__Bacteria;p__Proteobacteria;c__Betaproteobacteria;o__Burkholderiales;f__unclassified;g__Leptothrix	1.22e-05	1.77e-06	7.95e-06	3.78e-06	3.64e-05	7.35e-07	3.34e-06	2.34e-05	1.66e-05	6.35e-05	0.000207972	0.000162604	0.000192404	0.000215778	0.000230788	0.00020251	0.000201968	0.000117202	0.000215554	0.000189557	0.000239799	0.000232428	0.000233877	0.00026594	0.000292323	0.000215879	0.000197421	0.000204537	0.000316288	0.000271359
k__Bacteria;p__Firmicutes;c__Clostridia;o__Clostridiales;f__Clostridiales Family XVII. Incertae Sedis;g__Sulfobacillus	5.8e-06	1.15e-05	3.97e-06	8.32e-06	1.21e-05	4.9e-07	1.97e-06	1.25e-05	1.68e-06	2.02e-05	0.000212743	0.000216691	0.000171748	0.000239988	0.000251575	0.000218502	0.000294427	0.000190681	0.000264355	0.000302147	0.000216826	0.000209423	0.000190649	0.000220598	0.000191365	0.000221511	0.000169561	0.000211294	0.000235602	0.000239593
k__Bacteria;p__Bacteroidetes;c__Bacteroidia;o__Bacteroidales;f__Prevotellaceae;g__Prevotella	3.02e-05	7.09e-05	2.15e-05	2.04e-05	3.27e-05	2.06e-05	3.11e-06	2.9e-05	1.97e-05	6.35e-05	0.00019684	0.000155221	0.000213315	0.000206517	0.000203961	0.000196961	0.000253771	0.000191346	0.000239263	0.000222422	0.000204864	0.000219735	0.000197021	0.000206996	0.00022821	0.000195912	0.000160595	0.00023047	0.000242816	0.000262223
k__Eukaryota;p__Apicomplexa;c__Aconoidasida;o__Haemosporida;f__Plasmodiidae;g__Plasmodium	0.000763539	0.000876009	0.000926075	0.000659083	0.000290657	7.68e-05	3.41e-05	0.000140508	0.000193357	0.000338324	1.01e-05	1.03e-05	9.56e-06	7.64e-06	1.1e-05	1.13e-05	1.01e-05	9.14e-06	8.5e-06	9.97e-06	9.49e-06	7.73e-06	9.82e-06	9.86e-06	8.93e-06	9.04e-06	9.93e-06	9.5e-06	1.22e-05	3.32e-05
k__Bacteria;p__Cyanobacteria;c__unclassified;o__Nostocales;f__Hapalosiphonaceae;g__Mastigocladus	6.96e-06	1.77e-06	2.38e-06	2.27e-06	2.52e-05	4e-06	1.59e-06	2.87e-05	7.93e-06	0.000129557	0.000223875	0.000220126	0.000366958	0.000161834	0.000167362	0.000226334	0.000137268	0.000301067	0.000154108	0.000157116	0.000223091	0.0002239	0.000181177	0.000270474	0.000239897	0.000192841	0.000263068	0.00019084	0.000209783	0.000190387
k__Bacteria;p__Proteobacteria;c__Alphaproteobacteria;o__Rhizobiales;f__Beijerinckiaceae;g__Methylocella	4.64e-05	6.2e-06	1.11e-05	8.32e-06	7.72e-05	5.47e-06	9.86e-06	7.17e-05	3.39e-05	8.56e-05	0.000222108	0.000208965	0.000184626	0.000228127	0.000224392	0.000179664	0.000224044	0.000186193	0.000192833	0.000191042	0.000235053	0.000215769	0.000197882	0.000227301	0.000219608	0.000227142	0.000178688	0.000205816	0.000174091	0.000226305
k__Bacteria;p__Proteobacteria;c__Gammaproteobacteria;o__Oceanospirillales;f__Oceanospirillaceae;g__Marinomonas	3.66e-05	1.15e-05	1.11e-05	1.51e-05	6.4e-05	2.65e-05	6.75e-06	5.1e-05	3.51e-05	0.000118013	0.000208326	0.000178573	0.00015785	0.000195955	0.000215864	0.000203652	0.00025399	0.000219774	0.00023709	0.00020334	0.000202586	0.000198515	0.000187721	0.000203644	0.000214738	0.000201544	0.000157072	0.000216408	0.000234083	0.000234195
k__Bacteria;p__Actinobacteria;c__Actinobacteria;o__Corynebacteriales;f__Williamsiaceae;g__Williamsia	4.99e-05	7.97e-06	7.15e-06	7.57e-06	8.01e-05	7.03e-06	4.55e-06	7.71e-05	1.03e-05	9.17e-05	0.000223168	0.000220641	0.000225428	0.000277197	0.00019259	0.000216543	0.000146886	0.00017173	0.00015154	0.000176835	0.000188915	0.00026158	0.000208905	0.000215078	0.000239734	0.000218098	0.000254582	0.000203076	0.000181305	0.000182705
k__Bacteria;p__Planctomycetes;c__Planctomycetia;o__Planctomycetales;f__Planctomycetaceae;g__Rubripirellula	6.38e-06	4.43e-06	3.97e-06	4.54e-06	1.42e-05	1.06e-06	1.67e-06	1.43e-05	8.65e-06	4.27e-05	0.000237304	0.000235064	0.000191002	0.000219353	0.000228834	0.00021687	0.000244372	0.000235068	0.000226025	0.00024299	0.000232584	0.000208035	0.000197538	0.00020877	0.000203701	0.000219634	0.000202865	0.000211112	0.000224021	0.000208035
k__Bacteria;p__Proteobacteria;c__Betaproteobacteria;o__Rhodocyclales;f__Azonexaceae;g__Dechloromonas	8.12e-06	1.77e-06	3.97e-06	6.05e-06	2.54e-05	6.54e-07	3.03e-06	2.49e-05	1.73e-05	5.1e-05	0.000198961	0.000176856	0.000154153	0.000213666	0.000228123	0.00019843	0.000271039	0.000195835	0.000268306	0.000204188	0.00021113	0.000209621	0.000207182	0.000233412	0.000240546	0.000184649	0.000135457	0.000247453	0.000264269	0.000297726
k__Bacteria;p__Proteobacteria;c__Gammaproteobacteria;o__unclassified;f__unclassified;g__Sedimenticola	1.68e-05	2.66e-06	1.11e-05	4.54e-06	4.85e-05	8.99e-07	4.93e-06	3.41e-05	2.09e-05	9.17e-05	0.00019737	0.000184239	0.00014867	0.00022374	0.000223149	0.00019435	0.000279782	0.000214122	0.000250327	0.000219242	0.000202206	0.000182452	0.000181521	0.000217838	0.000223828	0.000203251	0.000157552	0.000232844	0.000257814	0.000249559
k__Bacteria;p__Chloroflexi;c__Thermomicrobia;o__unclassified;f__unclassified;g__Thermorudis	3.48e-06	0	1.59e-06	3.03e-06	2.95e-05	4.09e-07	7.58e-07	1.52e-05	4.8e-07	1.83e-05	0.00023218	0.00022459	0.000191767	0.000244213	0.000242514	0.000237757	0.000260766	0.000213955	0.000245388	0.000256772	0.000218344	0.000206646	0.000183932	0.000206207	0.000188119	0.000210418	0.000183331	0.000205633	0.000216807	0.000228589
k__Bacteria;p__Bacteroidetes;c__Flavobacteriia;o__Flavobacteriales;f__Flavobacteriaceae;g__Maribacter	2.67e-05	7.97e-06	1.35e-05	9.08e-06	2.81e-05	2.21e-06	2.81e-06	1.83e-05	1.13e-05	6.16e-05	0.000201965	0.000161574	0.000180674	0.000202454	0.000199519	0.00019484	0.000258143	0.000197497	0.000249932	0.000216698	0.000212079	0.000191773	0.000204771	0.000209164	0.000241682	0.000201544	0.000180929	0.000240879	0.00026351	0.000270736
k__Bacteria;p__Proteobacteria;c__Betaproteobacteria;o__Nitrosomonadales;f__Gallionellaceae;g__Sulfuricella	1.1e-05	1.77e-06	4.77e-06	3.03e-06	2.73e-05	7.35e-07	2.73e-06	2.01e-05	7.69e-06	5e-05	0.00017281	0.000173594	0.000155938	0.000220165	0.000222616	0.000206263	0.000296613	0.000217446	0.000258428	0.000203552	0.000211889	0.000184633	0.000201844	0.000235186	0.000229022	0.000199667	0.000135457	0.000263159	0.000256106	0.0002861
k__Bacteria;p__Proteobacteria;c__Alphaproteobacteria;o__Rhodospirillales;f__Rhodospirillaceae;g__Telmatospirillum	2.44e-05	6.2e-06	1.03e-05	6.05e-06	4.47e-05	2.53e-06	5.08e-06	4.23e-05	1.97e-05	7.82e-05	0.00019631	0.000190592	0.000165501	0.000186856	0.000213555	0.000168894	0.000246995	0.000324175	0.000251908	0.000210549	0.000199928	0.000173329	0.000189271	0.000201081	0.000222367	0.000196595	0.0001678	0.000232661	0.000234843	0.000242707
k__Bacteria;p__Proteobacteria;c__Betaproteobacteria;o__Burkholderiales;f__Oxalobacteraceae;g__Undibacterium	1.97e-05	5.31e-06	1.03e-05	9.08e-06	4.34e-05	1.8e-06	6.37e-06	3.42e-05	2.69e-05	0.000117051	0.000193836	0.000175139	0.000178379	0.000203592	0.000202184	0.000173789	0.000247432	0.000175886	0.000240448	0.000197191	0.000225749	0.000196532	0.000223543	0.000226118	0.000221069	0.000191134	0.000161555	0.000225721	0.000252878	0.000237309
k__Eukaryota;p__Mucoromycota;c__Glomeromycetes;o__Diversisporales;f__Diversisporaceae;g__Diversispora	0.000720604	0.000763518	0.000724167	0.000565253	0.000243509	8.56e-05	3.89e-05	0.000137874	0.000210411	0.000251739	1.5e-05	1.18e-05	2.3e-05	2.05e-05	2.95e-05	0.000111127	1.42e-05	1.53e-05	1.01e-05	1.84e-05	5.05e-05	1.92e-05	2.63e-05	0.000103103	1.48e-05	1.74e-05	1.6e-05	6.87e-05	5.89e-05	2.14e-05
k__Bacteria;p__Chlamydiae;c__Chlamydiia;o__Parachlamydiales;f__Parachlamydiaceae;g__Parachlamydia	8.99e-05	1.95e-05	1.99e-05	1.82e-05	9.46e-05	1.96e-06	2.43e-06	4e-05	2.33e-05	9.49e-05	0.000196664	0.000172563	0.000200692	0.000188481	0.000196321	0.000145396	0.000191913	0.000136486	0.000207256	0.00018256	0.000231255	0.000206646	0.00019616	0.000272051	0.000270411	0.000169461	0.000127611	0.000214947	0.000231046	0.00026077
k__Bacteria;p__Proteobacteria;c__Alphaproteobacteria;o__Rhizobiales;f__Rhodobiaceae;g__Amorphus	1.91e-05	4.43e-06	1.51e-05	8.32e-06	4.53e-05	1.88e-06	6.37e-06	4.88e-05	2.91e-05	8.92e-05	0.000235537	0.000246396	0.000167923	0.000206029	0.000216397	0.000208058	0.000224044	0.000203648	0.000187301	0.000211821	0.000222142	0.000193359	0.000184621	0.000212318	0.000190879	0.000223729	0.000172123	0.000213851	0.000195164	0.000219869
k__Bacteria;p__Proteobacteria;c__Alphaproteobacteria;o__Rhizobiales;f__Beijerinckiaceae;g__Rhodoblastus	4.47e-05	1.68e-05	3.02e-05	2.04e-05	5.17e-05	1.47e-06	8.8e-06	8.41e-05	4.44e-05	9.59e-05	0.000203378	0.000218237	0.000171366	0.000216266	0.000206448	0.00018717	0.000211804	0.000198162	0.000191845	0.000177259	0.000214547	0.000206448	0.000184966	0.000222569	0.00021766	0.000215367	0.00016748	0.000203989	0.000170484	0.00020409
k__Bacteria;p__Actinobacteria;c__Actinobacteria;o__Micrococcales;f__Micrococcaceae;g__Nesterenkonia	0.000375387	0.000586368	0.000448332	0.000361701	0.000126175	6.37e-06	6.9e-06	5.03e-05	0.000118656	0.00019626	0.00011927	0.000109719	0.000102131	0.000116663	0.000102869	0.000121897	0.000107541	0.0001049	9.29e-05	0.000125523	0.000105375	0.000108083	9.85e-05	9.25e-05	9.75e-05	0.000109049	9.99e-05	9.75e-05	8.88e-05	0.00010817
k__Bacteria;p__Proteobacteria;c__Gammaproteobacteria;o__Xanthomonadales;f__Rhodanobacteraceae;g__Frateuria	2.44e-05	2.04e-05	1.27e-05	3.03e-06	0.000110637	2.94e-06	6.98e-06	5.76e-05	2.64e-05	0.000147516	0.000192776	0.000179603	0.000214335	0.000190106	0.000183174	0.000180643	0.000212897	0.000172228	0.000214369	0.000188921	0.000171638	0.000178684	0.000189271	0.000196153	0.000194612	0.000188574	0.00027956	0.000222069	0.000201809	0.000207412
k__Bacteria;p__Proteobacteria;c__Betaproteobacteria;o__Ferrovales;f__Ferrovaceae;g__Ferrovum	1.22e-05	2.66e-06	5.56e-06	6.05e-06	2.09e-05	3.27e-07	3.87e-06	1.81e-05	1.54e-05	4.07e-05	0.000186415	0.000167756	0.00014714	0.000223902	0.00021693	0.000192066	0.000261421	0.000205311	0.000247561	0.00020864	0.000230686	0.000183642	0.000205805	0.000231638	0.000232593	0.000183113	0.000134656	0.000243436	0.000269395	0.000264715
k__Bacteria;p__Actinobacteria;c__Actinobacteria;o__Micrococcales;f__Microbacteriaceae;g__Rathayibacter	2.26e-05	1.24e-05	6.36e-06	5.3e-06	8.2e-05	4.41e-06	2.12e-06	5.47e-05	1.03e-05	0.000167719	0.000212566	0.000228024	0.000241493	0.000234789	0.000183885	0.000278226	0.000175301	0.000270312	0.000157862	0.000147999	0.000179042	0.000213984	0.000232843	0.00018393	0.000173673	0.000164341	0.000241773	0.000158151	0.000148082	0.000160075
k__Bacteria;p__Actinobacteria;c__Actinobacteria;o__Propionibacteriales;f__Nocardioidaceae;g__Thermasporomyces	5.05e-05	4.43e-06	3.97e-06	5.3e-06	4.71e-05	3.11e-06	2.96e-06	2.34e-05	2.64e-06	5.16e-05	0.000209739	0.000220126	0.000183861	0.000257861	0.000214621	0.000206916	0.000225793	0.000208137	0.000203304	0.000316353	0.000230875	0.000213191	0.000195127	0.000222175	0.00015095	0.00020837	0.000151148	0.000152125	0.000212251	0.000169833
k__Bacteria;p__Acidobacteria;c__Acidobacteriia;o__Acidobacteriales;f__Acidobacteriaceae;g__Candidatus Sulfotelmatomonas	4.06e-06	8.86e-07	6.36e-06	5.3e-06	1.15e-05	1.63e-07	2.65e-06	1.22e-05	1.92e-06	3.08e-05	0.000207619	0.000171876	0.000169198	0.000230889	0.000227768	0.000207568	0.00029093	0.000148289	0.000248747	0.000222635	0.000221952	0.000213389	0.000201844	0.000218232	0.00022399	0.0002082	0.00015451	0.000222434	0.000217756	0.000264092
k__Bacteria;p__Proteobacteria;c__Gammaproteobacteria;o__Enterobacterales;f__Enterobacteriaceae;g__Cronobacter	0.000362043	0.000598768	0.000713833	0.000555416	0.000173055	5.51e-05	0.000414575	0.000110764	0.000584394	0.000236987	2.63e-05	2.3e-05	3.06e-05	2.73e-05	2.84e-05	2.19e-05	2.84e-05	2.14e-05	3.24e-05	2.95e-05	2.53e-05	2.46e-05	2.36e-05	2.82e-05	2.81e-05	2.51e-05	2.45e-05	2.98e-05	2.24e-05	3.55e-05
k__Bacteria;p__Proteobacteria;c__Gammaproteobacteria;o__Chromatiales;f__Ectothiorhodospiraceae;g__Spiribacter	1.28e-05	6.2e-06	5.56e-06	2.27e-06	3.72e-05	1.72e-06	5.69e-06	3.32e-05	1.08e-05	8.56e-05	0.000188712	0.000198834	0.000148925	0.000198717	0.000208225	0.000189129	0.000276285	0.000223431	0.000238868	0.000226875	0.0001967	0.000184038	0.000176183	0.000180973	0.000208895	0.000206493	0.000157392	0.00023047	0.000239209	0.000245822
k__Bacteria;p__Proteobacteria;c__Alphaproteobacteria;o__Rhizobiales;f__unclassified;g__Hartmannibacter	4.47e-05	8.86e-06	9.54e-06	1.06e-05	7.05e-05	2.21e-06	1.19e-05	6.97e-05	4.68e-05	7.09e-05	0.000217337	0.000217207	0.000169963	0.000197905	0.000205915	0.00019125	0.000202405	0.00022393	0.000187103	0.000211609	0.000203535	0.000194946	0.000178938	0.000199701	0.000192177	0.000217756	0.000173884	0.000209468	0.000174281	0.000206166
k__Bacteria;p__Proteobacteria;c__Alphaproteobacteria;o__Rhizobiales;f__Rhizobiaceae;g__Pararhizobium	4.58e-05	1.95e-05	2.54e-05	2.57e-05	0.000113048	2.86e-06	1.05e-05	0.000116961	9.37e-05	0.000120578	0.000199314	0.00021652	0.000189216	0.000182307	0.000191524	0.000214259	0.000179235	0.00018453	0.000197377	0.000191254	0.000169169	0.000163215	0.000171705	0.000183142	0.00017627	0.000193865	0.000200943	0.000212207	0.000169725	0.000160075
k__Bacteria;p__Proteobacteria;c__Betaproteobacteria;o__Rhodocyclales;f__Zoogloeaceae;g__Uliginosibacterium	1.74e-05	2.66e-06	1.11e-05	5.3e-06	2.76e-05	1.47e-06	4.25e-06	3.42e-05	1.51e-05	7.06e-05	0.000182705	0.000172563	0.00014714	0.000204892	0.000189215	0.000182928	0.000256175	0.000198661	0.000238868	0.000219242	0.000216066	0.000180865	0.000209766	0.00021705	0.000235027	0.000188233	0.000149867	0.000230835	0.000253258	0.000255995
k__Bacteria;p__Actinobacteria;c__Actinobacteria;o__Frankiales;f__Frankiaceae;g__Jatrophihabitans	3.19e-05	6.2e-06	7.15e-06	7.57e-06	0.000149481	3.68e-06	4.85e-06	3.97e-05	6.97e-06	8.18e-05	0.000222108	0.000241073	0.000200564	0.000208304	0.000192413	0.000222581	0.000190164	0.00017173	0.000176237	0.000224543	0.000214357	0.000224098	0.000205288	0.000193196	0.00017903	0.000214173	0.000194059	0.000174404	0.000168775	0.000154884
k__Bacteria;p__Proteobacteria;c__Deltaproteobacteria;o__Syntrophobacterales;f__Syntrophaceae;g__Syntrophus	5.22e-06	3.54e-06	6.36e-06	3.78e-06	1.02e-05	7.35e-07	1.29e-06	1.52e-05	5.04e-06	3.14e-05	0.000204615	0.000167756	0.000156703	0.000238363	0.000228834	0.000178195	0.000318252	0.000177382	0.000254476	0.00023154	0.000215876	0.000180667	0.000190132	0.000218232	0.000214738	0.000194377	0.000143142	0.000236679	0.000214909	0.000256825
k__Bacteria;p__Actinobacteria;c__Actinobacteria;o__Micrococcales;f__Demequinaceae;g__Demequina	2.49e-05	4.43e-06	9.54e-06	3.78e-06	5.79e-05	4.33e-06	2.58e-06	4.31e-05	4.56e-06	7.25e-05	0.000218927	0.000226822	0.000193169	0.000216591	0.000200763	0.00023841	0.000203279	0.000175553	0.000201921	0.000215001	0.000212079	0.000220132	0.000197194	0.000193787	0.000175459	0.000201373	0.000203185	0.000176048	0.000198961	0.000187896
k__Bacteria;p__Proteobacteria;c__Alphaproteobacteria;o__Rhizobiales;f__Methylocystaceae;g__Hansschlegelia	3.08e-05	5.31e-06	1.11e-05	6.05e-06	4.9e-05	1.09e-05	6.98e-06	4.96e-05	3.48e-05	8.59e-05	0.000198961	0.00021961	0.000178506	0.000211879	0.000202184	0.000206589	0.000197378	0.000193674	0.000186708	0.000185953	0.000211889	0.000204862	0.000188582	0.000227892	0.000196722	0.000214855	0.000176606	0.000203989	0.000182444	0.000199522
k__Bacteria;p__Firmicutes;c__Clostridia;o__Clostridiales;f__Peptococcaceae;g__Desulfotomaculum	1.1e-05	1.42e-05	9.54e-06	3.78e-06	9.64e-06	1.39e-06	1.52e-06	1.43e-05	3.6e-06	2.92e-05	0.000190303	0.000176856	0.000148798	0.00022309	0.000223859	0.000197125	0.000288962	0.000179875	0.000256057	0.000262921	0.000218534	0.000191178	0.000178077	0.000204827	0.000190229	0.000203933	0.00015419	0.000210016	0.000221363	0.000254749
k__Bacteria;p__Spirochaetes;c__Spirochaetia;o__Spirochaetales;f__Spirochaetaceae;g__Treponema	7.54e-06	9.74e-06	1.11e-05	1.14e-05	1.58e-05	4.9e-07	2.73e-06	2.01e-05	8.65e-06	3.66e-05	0.000191186	0.000161918	0.00015122	0.000221628	0.000227057	0.000215891	0.000279345	0.000162919	0.000241239	0.000225603	0.000217775	0.000183642	0.000192888	0.000195956	0.000203377	0.000207858	0.000150988	0.000216408	0.000223642	0.000268452
k__Bacteria;p__Proteobacteria;c__Alphaproteobacteria;o__Rhodospirillales;f__Rhodospirillaceae;g__Phaeospirillum	2.32e-05	1.15e-05	1.35e-05	9.84e-06	3.62e-05	2.86e-06	3.72e-06	2.77e-05	1.59e-05	7.54e-05	0.00019472	0.000192138	0.000160911	0.000200667	0.00020325	0.00016563	0.00022317	0.000309047	0.000205675	0.000215637	0.000194232	0.000179874	0.000176527	0.000205813	0.000198832	0.000184649	0.000180449	0.000202711	0.000215288	0.000229212
k__Bacteria;p__Proteobacteria;c__Alphaproteobacteria;o__Rhizobiales;f__Phyllobacteriaceae;g__Aliihoeflea	3.37e-05	1.86e-05	1.91e-05	5.3e-06	6.75e-05	1.97e-05	5.23e-06	0.000109989	2.16e-05	0.000116088	0.000226349	0.000228882	0.000234481	0.000169633	0.000174824	0.000373851	0.000146448	0.00015976	0.000141859	0.000151179	0.000180371	0.000170949	0.000180488	0.000196744	0.000163772	0.000192841	0.000264509	0.000147924	0.000180166	0.000140143
k__Bacteria;p__Proteobacteria;c__Gammaproteobacteria;o__Methylococcales;f__Methylococcaceae;g__Methylosarcina	6.96e-06	4.43e-06	3.97e-06	3.78e-06	2.79e-05	3.27e-07	3.03e-06	2.43e-05	9.61e-06	5.58e-05	0.000195427	0.000177199	0.000153643	0.000223252	0.000225458	0.000194514	0.000283061	0.000183034	0.000228001	0.000225391	0.000202965	0.000183443	0.000178421	0.000211924	0.000207434	0.000198472	0.000132895	0.000215312	0.000218895	0.000246029
k__Bacteria;p__Proteobacteria;c__Alphaproteobacteria;o__Rhizobiales;f__Rhodobiaceae;g__Rhodobium	2.78e-05	3.54e-06	1.19e-05	1.51e-05	3.35e-05	2.04e-06	8.19e-06	4.69e-05	3.43e-05	7.92e-05	0.000217514	0.000226994	0.000158233	0.000206517	0.00021391	0.000209363	0.000210492	0.000202983	0.00019066	0.000198675	0.000202016	0.000206646	0.000163783	0.00021153	0.000191203	0.000214685	0.000174685	0.000201798	0.000156245	0.00020326
k__Bacteria;p__Proteobacteria;c__Deltaproteobacteria;o__Desulfobacterales;f__Desulfobacteraceae;g__Desulfobacterium	4.64e-06	2.66e-06	4.77e-06	6.05e-06	8.84e-06	7.35e-07	1.37e-06	1.12e-05	1.25e-05	4.3e-05	0.000195427	0.000161918	0.000161293	0.000214316	0.000231499	0.000190434	0.00029399	0.000150783	0.000266923	0.000211185	0.00022423	0.000183245	0.000171016	0.000205616	0.000216361	0.000194035	0.000151468	0.000214581	0.00022611	0.000254126
k__Bacteria;p__Proteobacteria;c__Gammaproteobacteria;o__unclassified;f__unclassified;g__Pseudohongiella	2.2e-05	1.06e-05	1.19e-05	5.3e-06	4.98e-05	2.7e-06	3.49e-06	5.34e-05	1.08e-05	7.79e-05	0.000200021	0.000165352	0.000150965	0.000196768	0.000194012	0.000173953	0.000244591	0.000202152	0.000229187	0.000184257	0.000201446	0.000172338	0.000182899	0.00020739	0.000216199	0.000192329	0.000160755	0.000234122	0.000217756	0.000226513
k__Bacteria;p__Actinobacteria;c__Acidimicrobiia;o__Acidimicrobiales;f__Acidimicrobiaceae;g__Ferrithrix	4.64e-06	2.66e-06	4.77e-06	2.27e-06	1.29e-05	8.17e-08	1.06e-06	1.08e-05	7.21e-07	1.38e-05	0.000221578	0.00024983	0.000177869	0.000207654	0.000206626	0.000238573	0.00022164	0.000239557	0.000179595	0.000294514	0.000216256	0.000204465	0.000171877	0.000161259	0.000168155	0.000228508	0.000171162	0.000198693	0.000210732	0.00017793
k__Bacteria;p__Proteobacteria;c__Gammaproteobacteria;o__Xanthomonadales;f__Rhodanobacteraceae;g__Pseudofulvimonas	1.33e-05	1.33e-05	3.97e-06	2.27e-06	0.000170912	1.8e-06	3.72e-06	1.92e-05	6.49e-06	0.00028958	0.000162561	0.000134445	0.00015377	0.000149972	0.000154392	0.0001733	0.000172241	0.000126511	0.000191055	0.000173019	0.000151702	0.000156869	0.000162749	0.000162639	0.000205	0.000147276	0.000441595	0.000201615	0.000241867	0.000199522
k__Bacteria;p__Proteobacteria;c__Gammaproteobacteria;o__Pseudomonadales;f__Pseudomonadaceae;g__Azotobacter	2.73e-05	7.97e-06	6.36e-06	6.05e-06	4.88e-05	7.78e-05	1.18e-05	5.81e-05	3.84e-05	6.96e-05	0.00017758	0.000172563	0.000159635	0.000333904	0.000181042	0.000152739	0.000239345	0.000161755	0.00019876	0.000172383	0.000189295	0.000185228	0.000169294	0.000200096	0.000197533	0.000183967	0.000143783	0.000199789	0.00018795	0.000225682
k__Bacteria;p__Acidobacteria;c__Acidobacteriia;o__Acidobacteriales;f__Acidobacteriaceae;g__Silvibacterium	8.7e-06	0	4.77e-06	5.3e-06	1.23e-05	5.72e-07	2.81e-06	1.63e-05	6e-06	2.69e-05	0.000185708	0.000171361	0.000152368	0.000215453	0.000217819	0.000198104	0.000281094	0.000173558	0.000247759	0.000223695	0.000206953	0.000175709	0.000174977	0.000216655	0.00018958	0.000197278	0.000146344	0.000193762	0.000232754	0.000262223
k__Bacteria;p__Proteobacteria;c__Betaproteobacteria;o__Neisseriales;f__Chromobacteriaceae;g__Pseudogulbenkiania	2.55e-05	5.31e-06	9.54e-06	5.3e-06	3.21e-05	1.47e-06	4.25e-06	2.6e-05	2.21e-05	7.99e-05	0.000159734	0.000162604	0.00015581	0.000202779	0.000220839	0.000167099	0.000255301	0.000202152	0.00024519	0.000210973	0.000183219	0.000170354	0.000187894	0.000199504	0.00019802	0.000183796	0.00014074	0.000208372	0.000236551	0.000242084
k__Bacteria;p__Proteobacteria;c__Betaproteobacteria;o__Nitrosomonadales;f__Sterolibacteriaceae;g__Sulfurisoma	9.86e-06	1.77e-06	3.18e-06	2.27e-06	2.3e-05	6.54e-07	3.19e-06	2.45e-05	9.13e-06	3.66e-05	0.000182351	0.000148181	0.000143187	0.000207004	0.000205738	0.00016612	0.000259673	0.000183367	0.000271072	0.000188285	0.000211509	0.000183642	0.000193577	0.000215473	0.000218472	0.000175434	0.000119926	0.000223713	0.000254207	0.000258486
k__Bacteria;p__Proteobacteria;c__Alphaproteobacteria;o__Rhodobacterales;f__Rhodobacteraceae;g__Roseivivax	3.25e-05	8.86e-07	3.18e-06	4.54e-06	2.95e-05	2.53e-06	5.69e-06	3.19e-05	1.99e-05	5.26e-05	0.000188005	0.000212742	0.000162696	0.000189618	0.000201296	0.000195982	0.000217268	0.000206474	0.000192438	0.000200583	0.000217585	0.000187211	0.000186516	0.000190436	0.000203539	0.000207517	0.00018141	0.000184997	0.000191177	0.000204713
k__Bacteria;p__Proteobacteria;c__Alphaproteobacteria;o__Rhodospirillales;f__Acetobacteraceae;g__Humitalea	0.000123002	4.43e-06	1.11e-05	3.78e-06	0.000176002	2.86e-06	4.47e-06	6.21e-05	7.93e-06	3.4e-05	0.000183765	0.000167927	0.000170856	0.00017077	0.000183352	0.000164325	0.000172897	0.000169402	0.000154503	0.00015224	0.000206193	0.000196731	0.000180833	0.000224147	0.000216524	0.000185673	0.000180609	0.000212938	0.000183204	0.000188519
k__Bacteria;p__Proteobacteria;c__Gammaproteobacteria;o__Oceanospirillales;f__Alcanivoracaceae;g__Ketobacter	2.49e-05	2.66e-06	6.36e-06	8.32e-06	4.47e-05	1.63e-06	7.05e-06	3.63e-05	1.37e-05	9.14e-05	0.000197194	0.000181664	0.000143187	0.000214966	0.000204849	0.000138379	0.000241312	0.000147624	0.00024519	0.000172595	0.000186257	0.000161232	0.00018686	0.000202856	0.00020711	0.000173557	0.00015435	0.000224443	0.000231425	0.000240008
k__Bacteria;p__Acidobacteria;c__Holophagae;o__Holophagales;f__Holophagaceae;g__Geothrix	5.8e-06	8.86e-07	1.59e-06	3.78e-06	7.77e-06	8.17e-08	1.82e-06	1.16e-05	2.16e-06	2.41e-05	0.000188536	0.000146464	0.000148798	0.000224552	0.000219773	0.000186355	0.000274099	0.000130834	0.000258428	0.000185953	0.000201067	0.000202878	0.000185827	0.000227301	0.000221393	0.000196936	0.000138979	0.000214947	0.000220034	0.000258694
k__Bacteria;p__Actinobacteria;c__Actinobacteria;o__Micrococcales;f__Promicromonosporaceae;g__Isoptericola	2.61e-05	9.74e-06	7.95e-06	1.29e-05	4.8e-05	2.61e-06	3.79e-06	4.43e-05	6.49e-06	6.7e-05	0.000207089	0.000226822	0.000202859	0.000182144	0.000197743	0.000223887	0.000173989	0.000171065	0.00018493	0.000199311	0.000201826	0.000220727	0.000203566	0.000180579	0.000180815	0.000198814	0.000203185	0.000159612	0.000171813	0.000150732
k__Bacteria;p__Chlorobi;c__Chlorobia;o__Chlorobiales;f__Chlorobiaceae;g__Chlorobium	6.38e-06	7.97e-06	5.56e-06	4.54e-06	2.22e-05	4.09e-07	1.29e-06	1.41e-05	1.22e-05	4.91e-05	0.00019684	0.000161746	0.00015734	0.000202942	0.000190991	0.000177216	0.000264263	0.000177216	0.000233138	0.000198675	0.000191004	0.000178089	0.000178421	0.000195956	0.000209869	0.000176287	0.000148586	0.000224078	0.000212061	0.00025122
k__Bacteria;p__Proteobacteria;c__Alphaproteobacteria;o__Rhizobiales;f__Aurantimonadaceae;g__Fulvimarina	2.84e-05	1.15e-05	1.03e-05	7.57e-06	5.38e-05	2.7e-06	6.3e-06	5.34e-05	2.93e-05	8.82e-05	0.000202848	0.000205015	0.000173788	0.000179057	0.000198986	0.00018407	0.000175957	0.0001965	0.000186313	0.000202491	0.000198978	0.000178485	0.000170155	0.000191619	0.000185198	0.000192841	0.00016748	0.000193762	0.000163649	0.000194955
k__Bacteria;p__Proteobacteria;c__Alphaproteobacteria;o__Sphingomonadales;f__Sphingomonadaceae;g__Citromicrobium	2.49e-05	2.57e-05	1.43e-05	6.05e-06	7.26e-05	8.25e-06	3.72e-06	9.53e-05	2.69e-05	0.000176057	0.000179171	0.000175482	0.00028	0.000138923	0.000143732	0.000218665	0.000137487	0.00023191	0.000141463	0.00014185	0.000179992	0.000162025	0.000150177	0.000199701	0.000167993	0.000145398	0.000234087	0.0001797	0.000206365	0.00016485
k__Bacteria;p__Proteobacteria;c__Gammaproteobacteria;o__Alteromonadales;f__Colwelliaceae;g__Colwellia	3.13e-05	2.48e-05	1.91e-05	3.18e-05	5.14e-05	5.72e-05	7.36e-06	4.31e-05	2.14e-05	9.11e-05	0.000178994	0.000166725	0.000141147	0.000178082	0.000185484	0.000152249	0.000234536	0.000187523	0.000209232	0.000189981	0.000180371	0.000170354	0.000162233	0.000175651	0.000185685	0.000156491	0.00015339	0.000212207	0.000207315	0.000202844
k__Bacteria;p__Proteobacteria;c__Alphaproteobacteria;o__Rhizobiales;f__Bradyrhizobiaceae;g__Oligotropha	3.19e-05	7.09e-06	1.35e-05	2.5e-05	7.8e-05	2.94e-06	7.81e-06	7.65e-05	2.91e-05	9.49e-05	0.000216807	0.000207419	0.000173788	0.000181332	0.000183885	0.000172484	0.000163279	0.000146294	0.00014008	0.000147363	0.00021056	0.000204663	0.000189788	0.000200884	0.000205162	0.000209736	0.000169561	0.00016783	0.000145424	0.000176684
k__Bacteria;p__Proteobacteria;c__Alphaproteobacteria;o__Rhizobiales;f__Aurantimonadaceae;g__Martelella	2.96e-05	8.86e-06	1.51e-05	9.08e-06	6.56e-05	3.19e-06	9.78e-06	6.77e-05	4.8e-05	9.43e-05	0.000191009	0.000184411	0.000156703	0.00017662	0.000201118	0.000199736	0.000188634	0.000185528	0.000175051	0.000201007	0.000164803	0.000169759	0.000181521	0.000174665	0.000167506	0.000184649	0.000176446	0.000202894	0.000165358	0.000180837
k__Bacteria;p__Bacteroidetes;c__Cytophagia;o__Cytophagales;f__Cytophagaceae;g__Siphonobacter	4.41e-05	7.09e-06	6.36e-06	9.84e-06	5.12e-05	1.72e-06	6.67e-06	2.91e-05	2.83e-05	7.34e-05	0.000181114	0.000135132	0.000166903	0.000162646	0.000166829	0.000188476	0.000211585	0.000160425	0.00021101	0.000176411	0.000178473	0.00017789	0.000193577	0.000184127	0.000202403	0.000163317	0.000155951	0.000224991	0.000236551	0.000231496
k__Bacteria;p__Bacteroidetes;c__Cytophagia;o__Cytophagales;f__Catalimonadaceae;g__Catalinimonas	1.86e-05	6.2e-06	3.18e-06	5.3e-06	2.81e-05	1.39e-06	4.17e-06	2.4e-05	1.35e-05	6.32e-05	0.000165742	0.000148525	0.000161548	0.000180194	0.00018122	0.000194677	0.000236285	0.000191679	0.000220493	0.000216061	0.000178853	0.00016262	0.000172738	0.00018945	0.000202727	0.000177482	0.000156432	0.000203624	0.000221553	0.000231703
k__Bacteria;p__Actinobacteria;c__Actinobacteria;o__Streptosporangiales;f__Thermomonosporaceae;g__Thermostaphylospora	0.000152011	3.54e-06	3.18e-06	7.57e-06	0.000308874	3.51e-06	2.58e-06	5.55e-05	3.12e-06	5.55e-05	0.0002343	0.00019643	0.000134135	0.000241451	0.00017589	0.000154697	0.000208744	0.000168072	0.000135141	0.000174927	0.000189675	0.000168966	0.000183932	0.000186887	0.00014186	0.000143009	0.000128252	0.00012747	0.000117706	0.00013952
k__Bacteria;p__Proteobacteria;c__Alphaproteobacteria;o__Rhodobacterales;f__Rhodobacteraceae;g__Pseudoruegeria	2.15e-05	7.97e-06	1.03e-05	1.51e-06	3.08e-05	2.21e-06	6.83e-06	3.44e-05	3.12e-05	4.94e-05	0.000189596	0.00020347	0.000165246	0.000195955	0.000198986	0.000171342	0.000194099	0.000176218	0.000192833	0.000192314	0.000204105	0.000177692	0.000173255	0.000192999	0.000184711	0.000198472	0.000170522	0.000174404	0.000179027	0.00020326
k__Bacteria;p__Proteobacteria;c__Alphaproteobacteria;o__Rhodobacterales;f__Rhodobacteraceae;g__Pseudooceanicola	6.73e-05	6.11e-05	8.03e-05	5.3e-05	5.81e-05	6.37e-06	7.96e-06	5.81e-05	4.11e-05	7.82e-05	0.000183058	0.000175482	0.000141785	0.00017467	0.000173935	0.000165304	0.000165683	0.000171896	0.000173273	0.000164113	0.000176194	0.000168966	0.000172394	0.00018945	0.000180166	0.000175092	0.000157552	0.000164178	0.000158524	0.000183328
k__Eukaryota;p__Chlorophyta;c__Mamiellophyceae;o__Mamiellales;f__Bathycoccaceae;g__Bathycoccus	0.000536102	0.00091321	0.000849764	0.000727186	0.000127246	3.97e-05	2.28e-05	0.000102863	0.000201283	0.000203315	6.01e-06	7.04e-06	1.07e-05	8.12e-06	1.12e-05	7.83e-06	1.16e-05	7.31e-06	9.09e-06	6.79e-06	5.7e-06	1.05e-05	1.17e-05	1.06e-05	1.23e-05	8.36e-06	1.12e-05	9.31e-06	1.01e-05	2.06e-05
k__Bacteria;p__Proteobacteria;c__Alphaproteobacteria;o__Rhodospirillales;f__Rhodospirillaceae;g__Nitrospirillum	3.37e-05	8.86e-07	1.35e-05	5.3e-06	8.04e-05	2.94e-06	1.06e-05	6.79e-05	3.92e-05	0.000100375	0.000159204	0.000160544	0.000154663	0.000167845	0.00017127	0.000157471	0.000192787	0.000238892	0.000173273	0.000177472	0.000183219	0.000171743	0.000156205	0.000197139	0.000188606	0.000171679	0.000169241	0.000195771	0.000179217	0.000193709
k__Bacteria;p__Proteobacteria;c__Betaproteobacteria;o__Burkholderiales;f__Comamonadaceae;g__Zhizhongheella	1.28e-05	1.77e-06	1.03e-05	4.54e-06	2.28e-05	1.55e-06	1.82e-06	2.39e-05	9.13e-06	9.4e-05	0.000175283	0.000152989	0.000178761	0.000207329	0.000205915	0.000171994	0.000166558	9.87e-05	0.000182361	0.00017832	0.00021113	0.000178882	0.000206321	0.000213895	0.000232755	0.000180212	0.000164437	0.000163812	0.000245094	0.000206997
k__Bacteria;p__Proteobacteria;c__Alphaproteobacteria;o__Rhodobacterales;f__Rhodobacteraceae;g__Oceanicella	4.76e-05	3.81e-05	3.26e-05	3.18e-05	4.18e-05	4.17e-06	6.3e-06	4.4e-05	3.15e-05	6.13e-05	0.000204615	0.000197804	0.000148415	0.000181982	0.000182286	0.000164814	0.000174864	0.000169901	0.000179991	0.000186801	0.000198219	0.000175709	0.000166021	0.000200293	0.000177894	0.000187209	0.000157873	0.000168743	0.000154537	0.000175231
k__Bacteria;p__Bacteroidetes;c__Cytophagia;o__Cytophagales;f__Cytophagaceae;g__Fibrisoma	1.74e-05	0	1.03e-05	8.32e-06	3.38e-05	5.72e-07	2.96e-06	2.14e-05	1.75e-05	5.84e-05	0.000171926	0.000142172	0.000168051	0.000174832	0.000168961	0.000199246	0.000214864	0.000153609	0.000194611	0.000189981	0.000178853	0.000180667	0.00019461	0.00018117	0.000197209	0.00019011	0.000166359	0.000193032	0.000223452	0.000233572
k__Bacteria;p__Rhodothermaeota;c__Rhodothermia;o__Rhodothermales;f__Rubricoccaceae;g__Rubricoccus	7.54e-06	6.2e-06	6.36e-06	1.51e-06	4.02e-06	3.27e-07	3.03e-07	5.58e-06	2.64e-06	3.94e-05	0.000219458	0.000196259	0.000198397	0.000182469	0.000227413	0.000225029	0.000241749	0.000117867	0.000141266	0.00014291	0.000165752	0.000173131	0.000164816	0.000258054	0.000240871	0.000207346	0.000245295	0.000177874	0.000128338	0.000156337
k__Bacteria;p__Proteobacteria;c__Alphaproteobacteria;o__Rhizobiales;f__Rhodobiaceae;g__Tepidicaulis	1.22e-05	7.09e-06	3.18e-06	5.3e-06	2.3e-05	1.23e-06	4.63e-06	2.79e-05	1.42e-05	6.13e-05	0.000182705	0.000160544	0.000140382	0.000186044	0.000203783	0.000151107	0.000225574	0.000185029	0.000200341	0.000179804	0.000197459	0.000187211	0.00017446	0.000202264	0.00020078	0.000178847	0.000146344	0.000199241	0.000182065	0.000217378
k__Bacteria;p__Firmicutes;c__Clostridia;o__Clostridiales;f__Peptococcaceae;g__Desulfosporosinus	1.33e-05	7.09e-06	3.97e-06	3.78e-06	1.77e-05	1.06e-06	2.05e-06	1.04e-05	6.49e-06	2.79e-05	0.000192953	0.000160372	0.000139745	0.000212853	0.000202895	0.00019076	0.000254427	0.000162919	0.000221481	0.000220938	0.000200497	0.000178287	0.00014036	0.000184916	0.000175459	0.000187038	0.000130333	0.000188466	0.000203328	0.000218623
k__Bacteria;p__Cyanobacteria;c__unclassified;o__Oscillatoriales;f__Coleofasciculaceae;g__Geitlerinema	0.000331292	0.00040656	0.000305247	0.000303435	0.000101529	5.23e-06	8.12e-06	3.47e-05	9.54e-05	0.00014495	9.98e-05	7.86e-05	8.53e-05	0.000108864	0.000108554	0.000100847	0.000143388	8.01e-05	0.000130004	0.000120011	0.000103666	8.47e-05	9.28e-05	0.000116312	9.46e-05	0.000105294	9.64e-05	0.000104825	0.000117896	0.000131838
k__Bacteria;p__Proteobacteria;c__Alphaproteobacteria;o__Rhodobacterales;f__Rhodobacteraceae;g__Gemmobacter	1.62e-05	4.43e-06	7.15e-06	7.57e-06	4.71e-05	1.88e-06	4.32e-06	4.4e-05	3e-05	6.16e-05	0.000169806	0.00018733	0.000151858	0.000190268	0.000169138	0.000167262	0.000187979	0.000161921	0.000167741	0.000168778	0.000186257	0.000189195	0.000195299	0.00020187	0.000180491	0.000189939	0.000197741	0.000182622	0.000173901	0.000192463
k__Bacteria;p__Actinobacteria;c__Actinobacteria;o__Corynebacteriales;f__Nocardiaceae;g__Smaragdicoccus	1.45e-05	7.09e-06	1.59e-06	5.3e-06	2.89e-05	3.02e-06	1.14e-06	1.89e-05	6e-06	2.79e-05	0.000183411	0.000254123	0.000204262	0.000196605	0.000254063	0.000236778	0.000133334	0.000104733	0.000162802	0.000145667	0.000159676	0.000188005	0.000179283	0.000230849	0.000165071	0.000180383	0.00012569	0.000220243	0.000205606	0.000188103
k__Bacteria;p__Bacteroidetes;c__Cytophagia;o__Cytophagales;f__Flammeovirgaceae;g__Fulvivirga	1.8e-05	1.06e-05	5.56e-06	3.03e-06	2.71e-05	9.81e-07	6.14e-06	2.01e-05	1.1e-05	7.02e-05	0.000169276	0.000157968	0.000169963	0.000139573	0.000153681	0.000183091	0.000204591	0.000264493	0.000219505	0.000192526	0.000163853	0.000159447	0.000166194	0.000160865	0.000195099	0.000150859	0.000149547	0.000180066	0.00025117	0.000210319
k__Bacteria;p__Proteobacteria;c__Alphaproteobacteria;o__Rhizobiales;f__Methylobacteriaceae;g__Methylorubrum	2.78e-05	3.54e-06	2.15e-05	1.29e-05	3.35e-05	1.55e-06	4.25e-06	5e-05	2.69e-05	6.45e-05	0.00017599	0.000180977	0.000155683	0.000181819	0.000181575	0.000164814	0.000174427	0.000173392	0.00016616	0.000144182	0.000200877	0.00020149	0.000172566	0.000189647	0.000202078	0.000186526	0.000171963	0.000199606	0.000157384	0.000187065
k__Bacteria;p__Proteobacteria;c__Betaproteobacteria;o__Burkholderiales;f__Comamonadaceae;g__Hylemonella	2.84e-05	1.68e-05	6.36e-06	7.57e-07	6.3e-05	1.63e-06	3.19e-06	4.54e-05	3.6e-05	9.81e-05	0.000140121	0.000120193	0.000132222	0.000164108	0.000163631	0.000135768	0.000168525	0.00012568	0.000174458	0.000148423	0.000150373	0.000156869	0.000173427	0.00018117	0.000193962	0.000155126	0.000150988	0.000439755	0.000216997	0.000219661
k__Bacteria;p__Proteobacteria;c__Gammaproteobacteria;o__Chromatiales;f__Ectothiorhodospiraceae;g__Inmirania	1.16e-05	7.97e-06	7.15e-06	1.51e-06	2.06e-05	4.09e-07	2.73e-06	1.86e-05	7.93e-06	6.48e-05	0.000162738	0.000153847	0.000121257	0.000178732	0.000183885	0.00016612	0.00027235	0.000176551	0.000246178	0.000215213	0.000185498	0.00016381	0.000145527	0.000186493	0.000184061	0.000182431	0.000122487	0.000198511	0.000205226	0.000210941
k__Bacteria;p__Actinobacteria;c__Actinobacteria;o__Streptosporangiales;f__Thermomonosporaceae;g__Thermomonospora	3.77e-05	2.66e-06	8.74e-06	3.78e-06	0.000326018	4.09e-06	2.05e-06	2.7e-05	4.08e-06	2.95e-05	0.000267519	0.000192996	0.000166393	0.000186694	0.000167539	0.000147517	0.000140328	0.000131499	0.000134351	0.000145455	0.000247014	0.000223107	0.000159649	0.000169736	0.000161176	0.000174922	0.000163957	0.000147376	0.000111441	0.000117513
k__Eukaryota;p__Ascomycota;c__Sordariomycetes;o__Glomerellales;f__Glomerellaceae;g__Colletotrichum	0.00126425	4.78e-05	4.61e-05	0.000107451	0.000423797	0.000247752	0.000167924	0.000333066	9.73e-05	6.35e-05	4.01e-05	5.05e-05	6.25e-05	3.17e-05	3.66e-05	4.14e-05	2.99e-05	2.78e-05	2.94e-05	3.41e-05	3.61e-05	3.85e-05	6.17e-05	3.04e-05	4.59e-05	0.000191646	7.99e-05	4.07e-05	3.78e-05	5.56e-05
k__Bacteria;p__Acidobacteria;c__Acidobacteriia;o__Acidobacteriales;f__Acidobacteriaceae;g__Terracidiphilus	0	1.77e-06	6.36e-06	6.05e-06	1.37e-05	2.45e-07	1.14e-06	1.19e-05	4.32e-06	2.89e-05	0.00017599	0.00014801	0.000136302	0.00020213	0.00020023	0.000180643	0.000253553	0.000140143	0.000230175	0.000195918	0.000199548	0.000183642	0.000166538	0.000188859	0.00019802	0.00017953	0.000131934	0.000189197	0.000194974	0.00023025
k__Bacteria;p__Proteobacteria;c__Gammaproteobacteria;o__Oceanospirillales;f__Hahellaceae;g__Hahella	2.9e-05	7.97e-06	9.54e-06	6.05e-06	4.42e-05	9.97e-06	8.49e-06	4.15e-05	2.43e-05	9.46e-05	0.000159734	0.000161231	0.000131457	0.000186044	0.000181397	0.00015845	0.000207651	0.000185694	0.000201329	0.000189769	0.000159107	0.000163017	0.000161716	0.000181959	0.000183088	0.000171679	0.000142182	0.000200154	0.00018852	0.000210111
k__Bacteria;p__Proteobacteria;c__Alphaproteobacteria;o__Sphingomonadales;f__Sphingomonadaceae;g__Parasphingopyxis	1.51e-05	5.31e-06	7.95e-06	1.51e-06	4.96e-05	3.51e-06	1.59e-06	3.42e-05	1.25e-05	0.000150723	0.000188359	0.000192481	0.000268269	0.000141198	0.000144087	0.000174442	0.000133989	0.000220273	0.000149169	0.000136337	0.000193662	0.000172139	0.000174633	0.000223358	0.00018325	0.000160928	0.000181089	0.000139341	0.000181685	0.00015177
k__Bacteria;p__Actinobacteria;c__Actinobacteria;o__Micromonosporales;f__Micromonosporaceae;g__Actinocatenispora	3.25e-05	4.43e-06	1.43e-05	1.21e-05	0.000111173	6.7e-06	6.83e-06	5.55e-05	4.32e-06	8.47e-05	0.000195073	0.000206561	0.000136812	0.000178894	0.00018957	0.00018407	0.000175957	0.000178379	0.000156084	0.000220938	0.000176954	0.000183443	0.000171705	0.000157119	0.000125954	0.000200349	0.000171322	0.000164543	0.000143525	0.000134953
k__Bacteria;p__Proteobacteria;c__Betaproteobacteria;o__Nitrosomonadales;f__Gallionellaceae;g__Sulfurirhabdus	6.96e-06	8.86e-07	3.97e-06	0	1.02e-05	5.72e-07	1.67e-06	1.18e-05	4.08e-06	3.53e-05	0.000145422	0.000143373	0.000149053	0.000192868	0.000195788	0.00018815	0.000254427	0.000172561	0.000219308	0.000167718	0.000188346	0.000173329	0.000175321	0.000189647	0.000194287	0.000164512	0.000114322	0.000242888	0.000216048	0.000219661
k__Bacteria;p__Actinobacteria;c__Actinobacteria;o__Streptosporangiales;f__Streptosporangiaceae;g__Planobispora	5.98e-05	8.86e-06	7.95e-07	1.89e-05	0.000373166	8.09e-06	7.05e-06	9.12e-05	7.21e-06	9.46e-05	0.000141534	0.000171876	0.00013643	0.00024665	0.000171093	0.000175748	0.000147541	0.000164249	0.000136524	0.00018362	0.000149234	0.000152308	0.000162233	0.000140363	0.000127902	0.000168608	0.000156272	0.000139158	0.0001253	0.000115436
k__Bacteria;p__Proteobacteria;c__Alphaproteobacteria;o__Rhodobacterales;f__Rhodobacteraceae;g__Albimonas	3.02e-05	3.54e-06	7.95e-06	1.44e-05	3.03e-05	1.72e-06	5.54e-06	4.32e-05	2.43e-05	6.35e-05	0.000174753	0.000175826	0.000161803	0.000184094	0.000186905	0.000155676	0.000207432	0.000185694	0.000183547	0.000176835	0.000181131	0.000180667	0.000162233	0.000186887	0.00018536	0.000171167	0.000159954	0.000166004	0.000186052	0.000184781
k__Bacteria;p__Actinobacteria;c__Actinobacteria;o__Actinopolysporales;f__Actinopolysporaceae;g__Actinopolyspora	3.83e-05	1.68e-05	1.43e-05	2.72e-05	6.16e-05	1.37e-05	8.34e-06	0.000115566	1.54e-05	0.000131481	0.000160441	0.000180633	0.000138215	0.000180032	0.000169849	0.000196798	0.000176831	0.000152445	0.000163789	0.000234084	0.000166701	0.000189393	0.000156894	0.000148445	0.000151112	0.000173386	0.000157232	0.000148107	0.000144854	0.000144711
k__Bacteria;p__Bacteroidetes;c__Flavobacteriia;o__Flavobacteriales;f__Flavobacteriaceae;g__Aquimarina	3.19e-05	4.43e-06	2.38e-06	7.57e-06	3.86e-05	2.61e-06	4.17e-06	2.88e-05	2.02e-05	5.48e-05	0.000166625	0.000136677	0.000155555	0.000171908	0.000169316	0.000171179	0.000213552	0.00016774	0.000207651	0.000182136	0.000181131	0.000175709	0.000167227	0.000185113	0.000208733	0.000172874	0.000134656	0.000192301	0.000199721	0.000215717
k__Bacteria;p__Proteobacteria;c__Alphaproteobacteria;o__Sphingomonadales;f__Sphingomonadaceae;g__Pacificimonas	3.42e-05	3.54e-06	1.83e-05	9.08e-06	6.21e-05	3.51e-06	1.82e-06	3.98e-05	1.73e-05	0.000122502	0.000172633	0.000156766	0.00021765	0.000150947	0.000158656	0.000169547	0.000142733	0.000243214	0.000160628	0.000158813	0.000181701	0.000158257	0.000152588	0.000194773	0.000174485	0.000154955	0.00018205	0.00016363	0.000191747	0.000171701
k__Bacteria;p__Chloroflexi;c__Ktedonobacteria;o__Ktedonobacterales;f__Ktedonobacteraceae;g__Dictyobacter	2.9e-06	3.54e-06	3.18e-06	3.03e-06	1.45e-05	4.09e-07	1.37e-06	1.36e-05	2.16e-06	2.15e-05	0.000179171	0.000161231	0.000137195	0.000207329	0.000191702	0.000203978	0.000234536	0.000146128	0.000221086	0.000212881	0.000193852	0.000155481	0.00014811	0.000185507	0.000166369	0.000198814	0.000144583	0.000178057	0.000197253	0.00022589
k__Bacteria;p__Proteobacteria;c__Alphaproteobacteria;o__Parvularculales;f__Parvularculaceae;g__Marinicaulis	7.08e-05	3.72e-05	5.25e-05	2.19e-05	0.000110369	3.51e-06	1.15e-05	9.53e-05	3.39e-05	0.000228329	0.000152843	0.000156938	0.000139872	0.000155172	0.000174291	0.000116349	0.000185574	0.000164914	0.000179793	0.000146515	0.000156449	0.000143383	0.000127272	0.000159091	0.000162312	0.000136183	0.000130974	0.000158699	0.000149601	0.000175023
k__Bacteria;p__Proteobacteria;c__Alphaproteobacteria;o__Kordiimonadales;f__Kordiimonadaceae;g__Kordiimonas	1.8e-05	7.97e-06	4.77e-06	2.27e-06	4.66e-05	1.88e-06	5.08e-06	3.83e-05	2.23e-05	8.15e-05	0.000183941	0.000157282	0.00014867	0.000171258	0.000171981	0.000159756	0.000193443	0.000212958	0.000190462	0.000181924	0.000169169	0.000159447	0.000160338	0.000198321	0.000177894	0.000159051	0.000138499	0.000190658	0.00018852	0.00018748
k__Bacteria;p__Proteobacteria;c__Betaproteobacteria;o__Burkholderiales;f__Comamonadaceae;g__Verminephrobacter	2.32e-05	1.06e-05	1.19e-05	5.3e-06	7.72e-05	5.64e-06	6.45e-06	4.49e-05	4.73e-05	0.000120899	0.000150192	0.00014097	0.00015377	0.000181657	0.000185839	0.000152249	0.00018317	0.000122688	0.000178608	0.000158389	0.00016898	0.000168371	0.00017446	0.00017979	0.000193638	0.000149323	0.000148266	0.000165456	0.000191177	0.000200145
k__Bacteria;p__Proteobacteria;c__Gammaproteobacteria;o__Chromatiales;f__Chromatiaceae;g__Thiodictyon	1.04e-05	4.43e-06	5.56e-06	3.78e-06	2.95e-05	1.06e-06	2.96e-06	2.12e-05	1.08e-05	5.58e-05	0.000171749	0.000143889	0.000136175	0.000196605	0.000184062	0.00015176	0.000246121	0.000138481	0.000234324	0.000197615	0.000170499	0.000162422	0.000143633	0.000189647	0.000162474	0.000165024	0.000131294	0.000199241	0.000197822	0.000221115
k__Bacteria;p__Proteobacteria;c__Betaproteobacteria;o__Burkholderiales;f__Comamonadaceae;g__Caldimonas	6.38e-06	8.86e-07	8.74e-06	0	2.33e-05	1.8e-06	3.64e-06	2.39e-05	9.61e-06	6.83e-05	0.000165212	0.000144747	0.000168688	0.000180194	0.000202895	0.000159429	0.00015694	0.000106396	0.000181966	0.000169838	0.000188346	0.000167578	0.000178594	0.000209558	0.00021977	0.000179359	0.000166199	0.000157421	0.00022516	0.000194955
k__Bacteria;p__Proteobacteria;c__Alphaproteobacteria;o__Rhodospirillales;f__Rhodospirillaceae;g__Nisaea	1.86e-05	4.43e-06	7.95e-06	3.03e-06	2.84e-05	1.88e-06	3.87e-06	3.83e-05	2.31e-05	5.03e-05	0.000153196	0.000170675	0.000122787	0.000177594	0.00017891	0.000153555	0.000201968	0.000289264	0.000183942	0.000192526	0.000164423	0.000149333	0.000130888	0.000166779	0.000168804	0.000175946	0.000135136	0.000187919	0.000181875	0.000197446
k__Bacteria;p__Proteobacteria;c__Gammaproteobacteria;o__Chromatiales;f__Ectothiorhodospiraceae;g__Thioalbus	2.03e-05	1.77e-06	3.18e-06	3.03e-06	3.27e-05	1.31e-06	3.34e-06	2.29e-05	1.32e-05	7.06e-05	0.000156907	0.000151615	0.000120619	0.000178569	0.000185661	0.000163183	0.000236066	0.000183865	0.000204095	0.000195918	0.00016898	0.000155282	0.000145527	0.000176833	0.000175134	0.000149153	0.000129052	0.000195041	0.000202379	0.000203052
k__Bacteria;p__Proteobacteria;c__Betaproteobacteria;o__Nitrosomonadales;f__Methylophilaceae;g__Methylovorus	1.57e-05	0	3.97e-06	3.78e-06	3.62e-05	3.11e-06	3.87e-06	3.3e-05	4.47e-05	0.000123144	0.000125278	0.000109376	0.000114371	0.000140873	0.000179621	0.000145722	0.000215082	0.000309379	0.000280358	0.000210761	0.000139171	0.000115024	0.000129511	0.000147854	0.000148678	0.000131063	8.77e-05	0.000211112	0.000234843	0.000201806
k__Bacteria;p__Proteobacteria;c__Betaproteobacteria;o__Burkholderiales;f__unclassified;g__Xylophilus	4.82e-05	1.24e-05	1.27e-05	1.36e-05	8.22e-05	3.27e-06	5.99e-06	6.65e-05	4.47e-05	0.000126671	0.000159381	0.000117618	0.000164353	0.000171908	0.000177311	0.000137073	0.000143607	9.82e-05	0.000173273	0.000149483	0.000163094	0.000159645	0.000190305	0.000183142	0.000188444	0.000148129	0.000163957	0.000166552	0.000189659	0.00017876
k__Bacteria;p__Firmicutes;c__Clostridia;o__Thermoanaerobacterales;f__Thermoanaerobacteraceae;g__Moorella	5.8e-06	7.09e-06	6.36e-06	2.27e-06	9.38e-06	4.09e-07	8.34e-07	5.73e-06	2.4e-06	1.38e-05	0.000168922	0.000162433	0.000132732	0.000198717	0.000190458	0.000172158	0.000256613	0.000149785	0.000211207	0.000234296	0.000165372	0.000152903	0.000156894	0.000182353	0.000168155	0.000172874	0.000115923	0.000184997	0.000189279	0.000210941
k__Bacteria;p__Proteobacteria;c__Gammaproteobacteria;o__unclassified;f__Candidatus Competibacteraceae;g__Candidatus Competibacter	9.86e-06	8.86e-07	7.15e-06	7.57e-06	3.03e-05	8.99e-07	2.58e-06	1.87e-05	1.13e-05	7.6e-05	0.000170513	0.000151787	0.000129799	0.000179382	0.000180509	0.000155187	0.00023388	0.000156435	0.00022563	0.000179592	0.000173536	0.000150324	0.000140188	0.000163428	0.0001727	0.000156662	0.000130813	0.000199058	0.000202189	0.000214056
k__Bacteria;p__Actinobacteria;c__Coriobacteriia;o__Coriobacteriales;f__Coriobacteriaceae;g__Collinsella	0.00038409	0.000463248	0.000385534	0.000278464	0.000111441	3.43e-06	6.07e-06	4.04e-05	0.00011097	0.000151685	7.72e-05	8.36e-05	6.48e-05	8.95e-05	9.43e-05	0.000100194	0.000107978	7.4e-05	9.37e-05	0.000114074	8.34e-05	6.7e-05	6.44e-05	6.82e-05	7.58e-05	8.46e-05	6.64e-05	8.42e-05	9.87e-05	0.000100073
k__Bacteria;p__Actinobacteria;c__Actinobacteria;o__Geodermatophilales;f__Geodermatophilaceae;g__Klenkia	1.39e-05	6.2e-06	2.38e-06	6.81e-06	2.46e-05	4.49e-06	2.65e-06	2.87e-05	5.04e-06	7.12e-05	0.000184472	0.000206389	0.000184626	0.000178894	0.00017589	0.000181459	0.000130929	0.000136818	0.000122891	0.000120223	0.000206953	0.000213588	0.000229055	0.000186099	0.000188931	0.000184137	0.000234407	0.00013788	0.000113529	0.000133499
k__Bacteria;p__Proteobacteria;c__Betaproteobacteria;o__Neisseriales;f__Neisseriaceae;g__Neisseria	2.2e-05	7.09e-06	5.72e-05	4.69e-05	3.75e-05	3.92e-06	8.19e-06	3.3e-05	2.4e-05	7.6e-05	0.000155317	0.000153332	0.0001502	0.000182794	0.000154747	0.000143438	0.000210055	0.000159261	0.000189672	0.000150331	0.000159486	0.000138029	0.000154138	0.000173088	0.000165396	0.000138914	0.000121207	0.000191936	0.000195544	0.00020928
k__Bacteria;p__Actinobacteria;c__Actinobacteria;o__Micrococcales;f__Micrococcaceae;g__Sinomonas	2.49e-05	5.31e-06	2.38e-06	9.84e-06	2.68e-05	2.78e-06	3.64e-06	3.14e-05	4.56e-06	5.68e-05	0.000168392	0.000176169	0.000174298	0.00017467	0.000183352	0.000196309	0.000170055	0.000172893	0.000170507	0.000207792	0.00016879	0.000174916	0.000164816	0.000164019	0.000156793	0.000183113	0.00016796	0.000134775	0.000180356	0.000146579
k__Bacteria;p__Proteobacteria;c__Alphaproteobacteria;o__Sphingomonadales;f__Sphingomonadaceae;g__Hephaestia	4.82e-05	1.33e-05	1.11e-05	3.48e-05	0.000124835	8.91e-06	6.52e-06	8.66e-05	9.03e-05	0.000304652	0.000150899	0.000137707	0.000220965	0.000113251	0.000114239	0.00014409	9.75e-05	0.000188354	0.000123484	0.000111317	0.000138601	0.000144573	0.000137088	0.000169342	0.000152898	0.000122531	0.000170362	0.000140985	0.000156435	0.000124364
k__Bacteria;p__Proteobacteria;c__Gammaproteobacteria;o__Chromatiales;f__Chromatiaceae;g__Rheinheimera	2.26e-05	1.15e-05	4.77e-06	6.81e-06	4.66e-05	1.85e-05	6.75e-06	4.2e-05	1.63e-05	0.00010262	0.000149486	0.000134445	0.000133497	0.000177594	0.000189748	0.000150291	0.00019847	0.000155438	0.000194018	0.000149271	0.000166511	0.000144573	0.000156377	0.00018255	0.00017205	0.000156491	0.00013978	0.000177326	0.000176559	0.000198069
k__Bacteria;p__Proteobacteria;c__Gammaproteobacteria;o__Cellvibrionales;f__Halieaceae;g__Chromatocurvus	1.86e-05	3.54e-06	9.54e-06	2.27e-06	3.13e-05	9.81e-07	5.92e-06	2.11e-05	9.61e-06	5.74e-05	0.000148425	0.000149383	0.000124444	0.000162321	0.00017358	0.000127772	0.000204153	0.000168903	0.000208244	0.000164113	0.000173346	0.000143383	0.000158272	0.000190633	0.000191203	0.000159904	0.00012569	0.000189379	0.000223642	0.000214471
k__Bacteria;p__Proteobacteria;c__Alphaproteobacteria;o__unclassified;f__unclassified;g__Polymorphum	3.37e-05	9.74e-06	1.11e-05	9.84e-06	4.53e-05	2.37e-06	6.83e-06	4.6e-05	5.38e-05	7.15e-05	0.000183058	0.000181149	0.000126994	0.00017662	0.000175001	0.000157308	0.000166776	0.000178712	0.000152923	0.000160297	0.000170119	0.000149531	0.000148799	0.000160077	0.000157605	0.000176628	0.000153069	0.000173491	0.000145994	0.000174193
k__Bacteria;p__Cyanobacteria;c__unclassified;o__Synechococcales;f__Leptolyngbyaceae;g__Phormidesmis	1.51e-05	1.06e-05	1.03e-05	1.21e-05	1.61e-05	1.47e-06	2.43e-06	1.98e-05	9.37e-06	5.32e-05	0.000146835	0.000148525	0.000128524	0.000191568	0.000178022	0.000170689	0.000215957	0.000133161	0.000196587	0.00019083	0.000176384	0.000154291	0.000143977	0.000165794	0.000161825	0.000178676	0.00015339	0.000159612	0.00017561	0.000209488
k__Bacteria;p__Proteobacteria;c__Gammaproteobacteria;o__Enterobacterales;f__Erwiniaceae;g__Erwinia	1.28e-05	5.31e-06	5.56e-06	7.57e-06	3.03e-05	1.8e-06	0.000919787	3.67e-05	0.000518341	5.1e-05	8.78e-05	9.43e-05	7.88e-05	9.9e-05	9.82e-05	9.14e-05	0.000114973	9.28e-05	9.58e-05	0.000104532	9.66e-05	8.29e-05	9.18e-05	0.000103498	0.000109236	9.49e-05	7.56e-05	0.000102999	0.000100999	0.000124156
k__Bacteria;p__Proteobacteria;c__Alphaproteobacteria;o__Rhodobacterales;f__Rhodobacteraceae;g__Pseudorhodobacter	1.68e-05	5.31e-06	1.27e-05	6.05e-06	3.38e-05	1.88e-06	4.55e-06	4.2e-05	5.07e-05	6.7e-05	0.000167509	0.000179947	0.000136047	0.000157122	0.000171803	0.000158613	0.000170492	0.000163584	0.000160233	0.000155844	0.00016879	0.000155877	0.000173599	0.000171905	0.000153709	0.000173215	0.000180449	0.000147011	0.000164978	0.0001744
k__Bacteria;p__Proteobacteria;c__Deltaproteobacteria;o__Desulfobacterales;f__Desulfobacteraceae;g__Desulfatitalea	5.22e-06	2.66e-06	5.56e-06	7.57e-07	9.91e-06	4.09e-07	2.2e-06	1.22e-05	3.36e-06	2.63e-05	0.000159734	0.000139253	0.000126229	0.000190106	0.000192057	0.000152413	0.000257924	0.000144964	0.00021753	0.000193586	0.000171258	0.000151118	0.00015586	0.000177819	0.00017416	0.000159733	0.000115282	0.000175865	0.000179976	0.00022236
k__Bacteria;p__Planctomycetes;c__Candidatus Brocadiae;o__Candidatus Brocadiales;f__Candidatus Brocadiaceae;g__Candidatus Scalindua	6.96e-06	5.31e-06	7.95e-06	5.3e-06	1.23e-05	8.17e-07	5.31e-07	9.14e-06	5.52e-06	1.96e-05	0.000149309	0.000140455	0.000130947	0.000188806	0.000176067	0.000174279	0.000240875	0.000128839	0.000210219	0.000220302	0.000170309	0.00016262	0.000150005	0.000161259	0.000186496	0.000164341	0.000110959	0.000178422	0.00018757	0.00020845
k__Eukaryota;p__Cryptophyta;c__unclassified;o__Pyrenomonadales;f__Geminigeraceae;g__Guillardia	0.000430506	0.000695315	0.000718603	0.000530445	0.000175466	4.74e-05	2.26e-05	0.000100385	0.000143156	0.000206522	2.16e-05	1.96e-05	2e-05	1.64e-05	1.71e-05	1.94e-05	2.45e-05	1.75e-05	2.67e-05	2.01e-05	1.92e-05	2.12e-05	2.19e-05	1.85e-05	2.03e-05	1.89e-05	1.52e-05	2.17e-05	2.6e-05	3.59e-05
k__Bacteria;p__Proteobacteria;c__Alphaproteobacteria;o__Rhizobiales;f__Hyphomicrobiaceae;g__Aquabacter	3.77e-05	2.66e-06	2.15e-05	7.57e-06	5.41e-05	1.96e-06	5.69e-06	5.36e-05	4.06e-05	9.33e-05	0.000178464	0.000173765	0.000139362	0.000171258	0.00016594	0.000139847	0.000147104	0.000139645	0.000143637	0.00013146	0.000189675	0.00016262	0.000160855	0.000180579	0.000157767	0.000169631	0.000136097	0.000173126	0.000141437	0.000163812
k__Bacteria;p__Actinobacteria;c__Actinobacteria;o__Kineosporiales;f__Kineosporiaceae;g__Quadrisphaera	1.68e-05	6.2e-06	5.56e-06	5.3e-06	3.67e-05	2.61e-06	4.17e-06	2.99e-05	4.56e-06	6.13e-05	0.000166448	0.000194713	0.000195719	0.000161671	0.000165052	0.000186681	0.000154754	0.000133327	0.00013198	0.000173655	0.000180751	0.000195144	0.000180833	0.000161851	0.000149651	0.000188745	0.000187334	0.000139524	0.000130426	0.000131008
k__Bacteria;p__Chloroflexi;c__Ktedonobacteria;o__Ktedonobacterales;f__Thermosporotrichaceae;g__Thermosporothrix	4.64e-06	8.86e-07	3.18e-06	8.32e-06	1.82e-05	1.31e-06	1.06e-06	1.46e-05	1.68e-06	2.63e-05	0.000164682	0.00015917	0.000143315	0.000186856	0.00019721	0.00018358	0.000205465	0.000143136	0.000198563	0.000193798	0.000163094	0.000160637	0.00014656	0.000153768	0.000158416	0.000173727	0.000133215	0.000167647	0.000164978	0.00020326
k__Bacteria;p__Actinobacteria;c__Actinobacteria;o__Propionibacteriales;f__Nocardioidaceae;g__Pimelobacter	1.68e-05	8.86e-06	2.38e-06	1.06e-05	2.95e-05	3.19e-06	2.05e-06	3.61e-05	2.88e-06	4.46e-05	0.00019525	0.000199864	0.000194572	0.00016817	0.000167362	0.000218175	0.000133771	0.00012302	0.000134153	0.000126796	0.000179232	0.000180865	0.000175666	0.000157514	0.000136017	0.000184308	0.000189095	0.000189379	0.000131185	0.000128932
k__Bacteria;p__Abditibacteriota;c__Abditibacteria;o__Abditibacteriales;f__Abitibacteriaceae;g__Abditibacterium	6.96e-06	6.2e-06	8.74e-06	8.32e-06	2.04e-05	1.72e-06	1.52e-06	7.44e-06	8.65e-06	6.48e-05	0.000164682	0.000125516	0.000275409	0.00017142	0.000160255	0.000206752	0.000175082	0.00010357	0.000157467	0.000156056	0.000143158	0.000153497	0.000160855	0.000159879	0.000163935	0.000153761	0.000172763	0.000162899	0.00018795	0.000178138
k__Bacteria;p__Proteobacteria;c__Gammaproteobacteria;o__Chromatiales;f__Ectothiorhodospiraceae;g__Nitrococcus	1.51e-05	2.66e-06	1.11e-05	1.51e-06	2.41e-05	6.54e-07	2.65e-06	2.22e-05	6e-06	4.75e-05	0.00015567	0.000154878	0.000115391	0.000178732	0.000173935	0.000157145	0.000237815	0.000168571	0.000193426	0.000192526	0.000176764	0.000152903	0.000140705	0.000157514	0.0001727	0.000144886	0.000116563	0.000181892	0.000170864	0.000189557
k__Bacteria;p__Proteobacteria;c__Alphaproteobacteria;o__Rhizobiales;f__unclassified;g__Methylobrevis	2.49e-05	7.09e-06	7.15e-06	1.59e-05	4.23e-05	1.55e-06	9.94e-06	7e-05	3.84e-05	7.15e-05	0.000169806	0.000185098	0.000134262	0.000167033	0.000163808	0.000168404	0.0001447	0.000142637	0.000155886	0.000152664	0.000159676	0.00014497	0.000142427	0.000165399	0.000157605	0.000178164	0.000152589	0.00017203	0.000136311	0.000167964
k__Bacteria;p__Bacteroidetes;c__Flavobacteriia;o__Flavobacteriales;f__Flavobacteriaceae;g__Myroides	0.000487365	0.000575739	0.000562005	0.000493366	0.000118674	6.46e-06	1.11e-05	3.9e-05	0.000157088	0.000200429	3.57e-05	3.07e-05	3.7e-05	3.28e-05	3.87e-05	3.75e-05	3.76e-05	2.74e-05	3.64e-05	4.18e-05	3.49e-05	4.2e-05	4.08e-05	4.49e-05	4.41e-05	3.31e-05	4.18e-05	4.55e-05	4.96e-05	4.98e-05
k__Bacteria;p__Proteobacteria;c__Gammaproteobacteria;o__Chromatiales;f__Ectothiorhodospiraceae;g__Alkalilimnicola	1.86e-05	5.31e-06	3.97e-06	3.78e-06	4.05e-05	1.88e-06	3.56e-06	3.59e-05	1.37e-05	8.53e-05	0.00015726	0.000142858	0.000122404	0.000158909	0.000180687	0.000149638	0.000198252	0.000178878	0.000198365	0.000165386	0.000152461	0.000152903	0.000151555	0.000159879	0.000163448	0.000144716	0.000118164	0.0001797	0.000168206	0.000176892
k__Bacteria;p__Proteobacteria;c__Gammaproteobacteria;o__Immundisolibacterales;f__Immundisolibacteraceae;g__Immundisolibacter	1.74e-05	5.31e-06	9.54e-06	6.05e-06	3.99e-05	1.14e-05	5.01e-06	3.64e-05	1.22e-05	8.98e-05	0.000146482	0.000126375	0.000113606	0.000163133	0.000166651	0.000136257	0.000200656	0.000157266	0.00020449	0.000168354	0.000156449	0.000124345	0.000140533	0.000151008	0.000171888	0.000140108	0.000144423	0.000182805	0.000195164	0.00020409
k__Bacteria;p__Proteobacteria;c__Deltaproteobacteria;o__Desulfovibrionales;f__Desulfonatronaceae;g__Desulfonatronum	4.64e-06	1.77e-06	2.38e-06	3.03e-06	1.34e-05	4.9e-07	2.05e-06	1.18e-05	5.52e-06	3.14e-05	0.000169806	0.00013702	0.00013133	0.00016947	0.000158301	0.000154697	0.00022623	0.000157266	0.00020528	0.000190406	0.000169929	0.000163215	0.000132094	0.000164808	0.000171239	0.000160928	0.000128572	0.000172943	0.000187191	0.000198484
k__Bacteria;p__Firmicutes;c__Limnochordia;o__Limnochordales;f__Limnochordaceae;g__Limnochorda	2.9e-06	0	1.59e-06	1.51e-06	6.97e-06	4.09e-07	6.83e-07	8.52e-06	4.8e-07	9.3e-06	0.000153373	0.000147323	0.000123169	0.000185719	0.000196854	0.000165304	0.000223607	0.000147458	0.000183547	0.000250623	0.000183599	0.000166785	0.000146905	0.000169736	0.000142347	0.000159392	0.000120726	0.000165273	0.000178458	0.000179591
k__Eukaryota;p__Chlorophyta;c__Nephroselmidophyceae;o__unclassified;f__unclassified;g__Nephroselmis	0.000555248	0.000819321	0.000769477	0.000564496	0.000139033	9.56e-06	1.26e-05	5.38e-05	0.000189754	0.000258153	3.53e-07	1.03e-06	3.06e-06	1.62e-06	7.11e-07	2.12e-06	6.56e-07	4.99e-07	2.37e-06	4.24e-07	7.59e-07	1.19e-06	3.1e-06	9.86e-07	1.62e-06	1.71e-07	9.45e-06	5.48e-07	1.71e-06	1.58e-05
k__Bacteria;p__Proteobacteria;c__Gammaproteobacteria;o__Oceanospirillales;f__Endozoicomonadaceae;g__Endozoicomonas	1.86e-05	9.74e-06	1.03e-05	1.29e-05	3.16e-05	2.75e-05	1.71e-05	3.38e-05	2.33e-05	6.77e-05	0.000154963	0.000139596	0.000116794	0.000153709	0.000156702	0.000133157	0.000179673	0.000148954	0.000201724	0.000166658	0.000162524	0.000136641	0.00014346	0.000160471	0.000167506	0.0001483	0.000116083	0.000184814	0.000186241	0.000192671
k__Bacteria;p__Proteobacteria;c__Gammaproteobacteria;o__Methylococcales;f__Methylococcaceae;g__Methyloterricola	2.09e-05	8.86e-07	7.15e-06	8.32e-06	2.89e-05	7.35e-07	4.4e-06	2.34e-05	1.2e-05	5.61e-05	0.000149309	0.000136677	0.000111566	0.000181169	0.000169849	0.000138705	0.000221203	0.000138315	0.000209627	0.000171747	0.000165752	0.000151713	0.000157066	0.000162836	0.0001615	0.000148641	0.000117364	0.00017824	0.000180356	0.000184781
k__Eukaryota;p__Chlorophyta;c__Chlorophyceae;o__Sphaeropleales;f__Selenastraceae;g__Raphidocelis	0.000375387	0.000715688	0.000668523	0.000606114	0.000121621	4.07e-05	2.08e-05	8.63e-05	0.000166695	0.00017766	2.09e-05	1.72e-05	2.08e-05	1.88e-05	1.97e-05	2.17e-05	2.19e-05	1.33e-05	2.25e-05	1.76e-05	1.58e-05	1.63e-05	2.84e-05	2.29e-05	2.27e-05	2.3e-05	2.64e-05	2.19e-05	2.03e-05	2.74e-05
k__Bacteria;p__Cyanobacteria;c__unclassified;o__Synechococcales;f__Acaryochloridaceae;g__Acaryochloris	4.12e-05	3.72e-05	2.46e-05	3.93e-05	2.2e-05	2.61e-06	2.81e-06	1.15e-05	1.56e-05	3.75e-05	0.000152136	0.000135475	0.000116539	0.000166871	0.000167006	0.000156492	0.000213115	0.000119862	0.000187894	0.000171747	0.000167461	0.00014497	0.000138638	0.000160077	0.000161176	0.000158539	0.000118805	0.000165821	0.000158334	0.000203467
k__Bacteria;p__Actinobacteria;c__Actinobacteria;o__Propionibacteriales;f__Nocardioidaceae;g__Mumia	2.49e-05	8.86e-06	4.77e-06	5.3e-06	4.53e-05	1.39e-06	2.05e-06	2.15e-05	1.68e-06	3.37e-05	0.00019525	0.000211884	0.000180291	0.000155172	0.000178555	0.000182928	0.000124153	0.000110053	0.000129214	0.000143546	0.000175245	0.000166983	0.000181005	0.000160274	0.000158903	0.000174751	0.000184772	0.000153768	0.000133274	0.000139728
k__Bacteria;p__Firmicutes;c__Bacilli;o__Bacillales;f__Bacillaceae;g__Lysinibacillus	8.12e-06	6.2e-06	8.74e-06	2.27e-06	1.18e-05	8.17e-07	9.86e-07	9.91e-06	4.32e-06	2.66e-05	0.000163445	0.000155565	0.000124699	0.000159721	0.000180331	0.00015894	0.000187979	0.000183533	0.000223852	0.000226663	0.00018303	0.000161034	0.000144666	0.000149037	0.000137965	0.000153931	0.000118645	0.000143359	0.000167636	0.000180214
k__Bacteria;p__Actinobacteria;c__Actinobacteria;o__Micrococcales;f__Dermacoccaceae;g__Luteipulveratus	5.28e-05	2.66e-06	3.18e-06	7.57e-07	4.74e-05	2.61e-06	2.58e-06	2.65e-05	8.89e-06	4.46e-05	0.000168039	0.000177886	0.000179654	0.000169633	0.000161854	0.000193045	0.000138142	0.000123353	0.00014008	0.000171959	0.000162904	0.000182055	0.000160855	0.0001516	0.000149164	0.000185332	0.000175325	0.000129114	0.000132135	0.000127478
k__Bacteria;p__Proteobacteria;c__Alphaproteobacteria;o__Rhodospirillales;f__Acetobacteraceae;g__Komagataeibacter	2.84e-05	3.54e-06	3.18e-06	9.08e-06	4.39e-05	2.78e-06	6.83e-06	3.56e-05	3.7e-05	5.9e-05	0.000151606	0.000144747	0.000138725	0.000153222	0.000152438	0.000142622	0.000167651	0.000190681	0.000166358	0.000167294	0.000158917	0.000147548	0.00014656	0.000162442	0.000169129	0.000161781	0.000134976	0.000164725	0.000159283	0.000157376
k__Bacteria;p__Proteobacteria;c__Alphaproteobacteria;o__Rhizobiales;f__Beijerinckiaceae;g__Methyloferula	5.16e-05	0	7.95e-06	1.06e-05	6.43e-05	1.55e-06	9.03e-06	5.64e-05	2.14e-05	0.000110316	0.000168746	0.000162261	0.000125974	0.000166058	0.00016594	0.000141479	0.000157596	0.000138148	0.000141068	0.000139518	0.000167081	0.000156472	0.000137605	0.000158499	0.000148678	0.000152737	0.000134176	0.000159247	0.000130616	0.000163812
k__Bacteria;p__Actinobacteria;c__Actinobacteria;o__Streptosporangiales;f__Nocardiopsaceae;g__Thermobifida	2.09e-05	7.09e-06	2.38e-06	7.57e-06	0.000124835	4.25e-06	3.49e-06	5.03e-05	4.8e-06	5.55e-05	0.000215747	0.000176513	0.000161803	0.00016882	0.000146219	0.000151597	0.000143607	0.000131	0.00014581	0.000185105	0.000149993	0.00015905	0.000142255	0.000145094	0.000137803	0.000157856	0.000140901	0.000126923	0.000130616	0.000136406
k__Bacteria;p__Proteobacteria;c__Alphaproteobacteria;o__Parvularculales;f__Parvularculaceae;g__Parvularcula	2.03e-05	1.86e-05	7.95e-06	6.81e-06	3.19e-05	8.17e-07	5.23e-06	3.84e-05	2.88e-05	6.35e-05	0.000152843	0.000144575	0.000130947	0.000156147	0.000159722	0.000142295	0.00017705	0.000174057	0.000159245	0.000159449	0.000144867	0.000148143	0.000136399	0.000166976	0.000159065	0.000154102	0.000135136	0.000173857	0.000165548	0.000170663
k__Bacteria;p__Actinobacteria;c__Actinobacteria;o__Micrococcales;f__Microbacteriaceae;g__Lysinimonas	1.22e-05	1.06e-05	7.95e-07	0	0.000100993	2.21e-06	4.55e-07	4.74e-05	9.61e-07	0.000199467	0.000188005	0.000144747	0.000256794	0.000234464	0.000123833	0.00018407	6.51e-05	0.000162919	9.56e-05	3.88e-05	9.85e-05	0.000191773	0.000160683	0.000134251	0.000201429	8.33e-05	0.000217435	0.000113774	0.000122642	0.000123741
k__Bacteria;p__Proteobacteria;c__Gammaproteobacteria;o__Methylococcales;f__Methylococcaceae;g__Methylomicrobium	1.16e-05	8.86e-07	9.54e-06	7.57e-07	3.27e-05	6.54e-07	3.79e-06	2.45e-05	8.89e-06	4.39e-05	0.000153196	0.000145434	0.000133625	0.000175807	0.000161676	0.000152413	0.000204591	0.000129171	0.000194018	0.000166022	0.000150942	0.000137434	0.00014811	0.000153177	0.000158416	0.000161952	0.000123768	0.000174404	0.000172952	0.000180006
k__Bacteria;p__Proteobacteria;c__Gammaproteobacteria;o__Methylococcales;f__Methylococcaceae;g__Methylomagnum	1.68e-05	1.24e-05	6.36e-06	9.84e-06	2.79e-05	6.54e-07	3.34e-06	1.92e-05	1.22e-05	6.83e-05	0.000150016	0.000142858	0.000107996	0.000185719	0.000158123	0.000155187	0.000205246	0.000136818	0.000179398	0.000174927	0.000158537	0.000133269	0.000137605	0.000163231	0.000163772	0.000140961	0.000114482	0.000165821	0.000166307	0.000187688
k__Bacteria;p__Proteobacteria;c__Gammaproteobacteria;o__Xanthomonadales;f__Xanthomonadaceae;g__Silanimonas	1.33e-05	1.59e-05	7.95e-06	6.05e-06	5.73e-05	7.35e-07	8.34e-07	1.84e-05	5.28e-06	6.25e-05	0.000131109	0.000121567	0.000175319	0.000126737	0.000121168	0.000131199	0.000129618	0.000112214	0.000148774	0.000143758	0.000136323	0.000115817	0.000159133	0.000153768	0.000174485	0.000125602	0.0003918	0.000154316	0.000186052	0.000151147
k__Bacteria;p__Bacteroidetes;c__Chitinophagia;o__Chitinophagales;f__Chitinophagaceae;g__Arachidicoccus	3.08e-05	5.31e-06	7.95e-06	6.81e-06	3.99e-05	2.21e-06	3.26e-06	3.69e-05	2.91e-05	7.5e-05	0.000149132	8.88e-05	0.000133242	0.000136649	0.000126854	0.000148659	0.000171804	7.98e-05	0.000174854	0.000103048	0.000157967	0.000140409	0.000161371	0.000180776	0.000192015	0.000140449	0.000152749	0.000180248	0.000183584	0.000237724
k__Bacteria;p__Firmicutes;c__Bacilli;o__Bacillales;f__Alicyclobacillaceae;g__Tumebacillus	5.22e-06	4.43e-06	9.54e-06	3.03e-06	1.45e-05	4.09e-07	1.29e-06	1.32e-05	2.64e-06	2.69e-05	0.000131639	0.000129809	0.000129799	0.000168333	0.000171093	0.000155187	0.00021246	0.00013632	0.000193821	0.000159661	0.000164992	0.000152704	0.000134505	0.000171116	0.000156793	0.000166389	0.000131774	0.000166186	0.000160612	0.000190595
k__Bacteria;p__Proteobacteria;c__Alphaproteobacteria;o__Rhodobacterales;f__Rhodobacteraceae;g__Oceanicola	2.73e-05	2.66e-06	8.74e-06	1.51e-06	2.95e-05	1.63e-06	4.7e-06	3.18e-05	1.59e-05	6.41e-05	0.000156907	0.000163291	0.000134517	0.000155822	0.000150128	0.000155513	0.000146886	0.000166742	0.000146996	0.000173443	0.000156638	0.000148738	0.000147766	0.000151994	0.00015517	0.000150689	0.000142502	0.000162534	0.000152069	0.000151355
k__Eukaryota;p__unclassified;c__unclassified;o__Longamoebia;f__Acanthamoebidae;g__Acanthamoeba	0.000258768	0.000250668	0.000251193	0.000218685	6.51e-05	1.56e-05	4.95e-05	9.62e-05	5.79e-05	8.05e-05	9.93e-05	0.000115729	8.2e-05	9.26e-05	0.000100381	9.42e-05	9.66e-05	0.000111217	9.15e-05	8.1e-05	0.00011221	0.000104315	7.73e-05	9.62e-05	8.62e-05	8.81e-05	8.63e-05	0.000118339	8.83e-05	9.03e-05
k__Bacteria;p__Proteobacteria;c__Betaproteobacteria;o__Burkholderiales;f__Burkholderiaceae;g__Robbsia	2.38e-05	8.86e-07	8.74e-06	6.81e-06	3.7e-05	1.14e-06	3.34e-06	2.43e-05	2.47e-05	7.18e-05	0.000150546	0.000130839	0.000129162	0.000160859	0.000161676	0.000125487	0.000184044	0.000144133	0.00017268	0.000159025	0.00015379	0.000146556	0.000138983	0.000165005	0.000178056	0.000136524	0.000115442	0.000151759	0.000170674	0.000177722
k__Eukaryota;p__Chlorophyta;c__Trebouxiophyceae;o__Chlorellales;f__Chlorellaceae;g__Micractinium	0.000417161	0.000680258	0.000622418	0.00059325	0.000111709	3.74e-05	2.27e-05	8.02e-05	0.000146279	0.00018696	1.61e-05	1.6e-05	1.35e-05	1.43e-05	2.06e-05	1.52e-05	1.77e-05	1.2e-05	2.02e-05	1.46e-05	1.63e-05	1.61e-05	1.74e-05	1.89e-05	1.87e-05	1.66e-05	2.24e-05	1.44e-05	2.15e-05	2.57e-05
k__Bacteria;p__Actinobacteria;c__Actinobacteria;o__Corynebacteriales;f__Dietziaceae;g__Dietzia	3.71e-05	9.74e-06	6.36e-06	9.84e-06	5.3e-05	7.35e-06	4.02e-06	8.78e-05	5.76e-06	7.89e-05	0.000151076	0.000169301	0.000130819	0.000147535	0.000143554	0.000148986	0.000159345	0.00012302	0.000154306	0.000175987	0.000149044	0.00015786	0.000143977	0.000147263	0.000138127	0.000142497	0.00012633	0.000121261	0.000167067	0.000144296
k__Bacteria;p__Actinobacteria;c__Actinobacteria;o__Jiangellales;f__Jiangellaceae;g__Haloactinopolyspora	2.15e-05	4.43e-06	6.36e-06	1.06e-05	5.55e-05	6.78e-06	3.56e-06	3.67e-05	4.8e-06	5.03e-05	0.000162031	0.000191966	0.000135155	0.000160696	0.000153326	0.000189292	0.000132678	0.000156435	0.000132573	0.0002608	0.000146765	0.000152506	0.000136055	0.000115918	0.000110534	0.000156832	0.000138179	0.000115783	0.000173142	0.000111076
k__Bacteria;p__Chloroflexi;c__Anaerolineae;o__Anaerolineales;f__Anaerolineaceae;g__Longilinea	1.74e-06	8.86e-07	2.38e-06	7.57e-07	2.68e-06	1.63e-07	6.07e-07	4.8e-06	0	6.41e-06	0.000155317	0.000140111	0.000115519	0.000196768	0.000198453	0.00016563	0.000245465	9.59e-05	0.000214764	0.00014397	0.000125501	0.000127915	0.000121933	0.000141348	0.000145107	0.000146764	0.000106156	0.000195041	0.000146373	0.000255995
k__Bacteria;p__Bacteroidetes;c__Flavobacteriia;o__Flavobacteriales;f__Crocinitomicaceae;g__Fluviicola	1.16e-05	2.13e-05	2.38e-06	7.57e-07	2.81e-05	3.35e-06	2.81e-06	3.49e-05	9.37e-06	6.25e-05	0.000141888	9.46e-05	0.000159125	0.000115363	0.000111219	0.000150618	0.000140984	0.000109721	0.000159048	0.000158389	0.000160815	0.000131088	0.000151555	0.000161654	0.000218147	0.000119288	0.000132254	0.00016783	0.000236741	0.000204298
k__Bacteria;p__Proteobacteria;c__Alphaproteobacteria;o__Rhodospirillales;f__Acetobacteraceae;g__Rubritepida	6.85e-05	7.09e-06	3.18e-06	4.54e-06	8.92e-05	2.37e-06	2.65e-06	3.36e-05	7.45e-06	3.17e-05	0.000149662	0.000133758	0.000131967	0.000141686	0.000137336	0.000133647	0.000130274	0.000156768	0.000129609	0.000123403	0.000163284	0.000164603	0.000143633	0.000168948	0.00017481	0.000148129	0.000145544	0.000162351	0.000145994	0.000152185
k__Bacteria;p__Actinobacteria;c__Actinobacteria;o__Streptosporangiales;f__Streptosporangiaceae;g__Planomonospora	8.53e-05	4.43e-06	3.18e-06	8.32e-06	0.000364326	4.98e-06	5.31e-06	7.84e-05	1.39e-05	7.76e-05	0.000115383	0.000138394	0.000119854	0.000240801	0.000128453	0.000139521	0.000114099	0.00013765	8.83e-05	0.000127432	0.000121134	0.000132872	0.000139327	0.000112369	0.000101607	0.000138402	0.000132895	0.000117061	9.21e-05	0.000102149
k__Bacteria;p__Proteobacteria;c__Betaproteobacteria;o__Neisseriales;f__Chromobacteriaceae;g__Andreprevotia	1.16e-05	8.86e-07	3.97e-06	4.54e-06	2.52e-05	1.01e-05	3.26e-06	1.84e-05	6.49e-06	6.06e-05	0.000144008	0.00012895	0.000117432	0.000142661	0.000153326	0.000146375	0.000183388	0.000152944	0.00016616	0.000151391	0.000164043	0.000150721	0.000141394	0.000165596	0.000160364	0.000131917	0.000114322	0.000166734	0.000181685	0.000176061
k__Bacteria;p__Proteobacteria;c__Gammaproteobacteria;o__unclassified;f__unclassified;g__Thiohalobacter	2.26e-05	4.43e-06	1.27e-05	1.06e-05	4.15e-05	9.81e-07	4.55e-06	2.87e-05	1.39e-05	8.95e-05	0.000133229	0.000137879	9.73e-05	0.00014851	0.000172336	0.00012973	0.000207432	0.000162919	0.000192833	0.000147787	0.000145436	0.00012018	0.000127616	0.000143714	0.000158254	0.000121677	9.61e-05	0.000163447	0.00017542	0.000164019
k__Bacteria;p__Actinobacteria;c__Actinobacteria;o__Frankiales;f__Motilibacteraceae;g__Motilibacter	1.57e-05	7.97e-06	3.97e-06	7.57e-07	4.93e-05	4.58e-06	2.05e-06	1.69e-05	4.32e-06	5.1e-05	0.000163268	0.000176684	0.000169326	0.000146073	0.000145864	0.000180643	0.000133552	0.000125348	0.000120323	0.000143334	0.000180561	0.00018622	0.00016981	0.000141546	0.000136504	0.000175775	0.000156111	0.000124549	0.00012568	0.000116059
k__Bacteria;p__Proteobacteria;c__Gammaproteobacteria;o__Legionellales;f__Coxiellaceae;g__Coxiella	5.63e-05	4.43e-06	4.77e-06	6.81e-06	2.33e-05	2.29e-06	1.97e-06	3.25e-05	7.93e-06	5.58e-05	0.000161678	0.000127233	0.000104936	0.000152247	0.000154925	0.000123692	0.000159345	0.000149619	0.000151935	0.000168778	0.000145816	0.000120775	0.000136744	0.000183339	0.000163286	0.000148982	0.000102793	0.000161986	0.000176369	0.000171078
k__Bacteria;p__Proteobacteria;c__Betaproteobacteria;o__Burkholderiales;f__unclassified;g__Tepidimonas	1.33e-05	5.31e-06	5.56e-06	1.51e-06	2.09e-05	1.06e-06	1.74e-06	2.26e-05	1.08e-05	4.94e-05	0.00013588	0.000133586	0.000116411	0.000139086	0.000160077	0.000139032	0.000173989	0.000116703	0.000164382	0.000149695	0.000169739	0.000142193	0.000157066	0.000167962	0.000181302	0.000129357	0.000128252	0.000156325	0.000193456	0.000168379
k__Bacteria;p__Bacteroidetes;c__Sphingobacteriia;o__Sphingobacteriales;f__Sphingobacteriaceae;g__Arcticibacter	4.29e-05	6.2e-06	1.59e-06	1.21e-05	4.77e-05	2.61e-06	8.42e-06	3.36e-05	3.27e-05	6.19e-05	0.000134643	0.000106114	0.000166266	0.000142498	0.000125788	0.000185865	0.000132241	0.000101575	0.000140278	0.000113226	0.000131576	0.000169363	0.000152588	0.000151402	0.00015517	0.000128333	0.00014042	0.000148472	0.00018757	0.00018748
k__Bacteria;p__Proteobacteria;c__Betaproteobacteria;o__Burkholderiales;f__Comamonadaceae;g__Delftia	2.44e-05	6.2e-06	1.03e-05	2.27e-06	4.39e-05	2.04e-06	2.54e-05	7.48e-05	0.000420581	6.06e-05	9.47e-05	9.46e-05	9.28e-05	0.000113738	0.000116727	0.000113575	0.000140547	0.000115705	0.000138697	0.000189133	0.00012588	0.000110661	0.000116077	0.00013228	0.000133096	0.000111097	0.000106156	0.000118522	0.000171433	0.000132669
k__Bacteria;p__Proteobacteria;c__Gammaproteobacteria;o__Chromatiales;f__Chromatiaceae;g__Lamprocystis	6.96e-06	7.09e-06	5.56e-06	3.78e-06	1.98e-05	4.09e-07	3.64e-06	1.75e-05	5.52e-06	4.49e-05	0.000137117	0.000117789	0.000109144	0.000162321	0.000159189	0.000134299	0.000191039	0.000123519	0.000195994	0.000161145	0.00015474	0.000134459	0.000132094	0.000159682	0.000162312	0.000145569	0.000104875	0.000162717	0.000173711	0.000188103
k__Bacteria;p__Bacteroidetes;c__Bacteroidia;o__Bacteroidales;f__Dysgonamonadaceae;g__Dysgonomonas	1.39e-05	7.09e-06	6.36e-06	6.05e-06	1.85e-05	3.27e-07	2.5e-06	1.52e-05	3e-05	3.88e-05	6.93e-05	6.3e-05	0.000546739	8.16e-05	8.21e-05	8.4e-05	9.33e-05	7.3e-05	8.36e-05	8.48e-05	7.73e-05	0.000933082	8.59e-05	8.46e-05	9.17e-05	7.32e-05	7e-05	9.3e-05	9.89e-05	0.000103602
k__Bacteria;p__Bacteroidetes;c__Cytophagia;o__Cytophagales;f__Cytophagaceae;g__Sporocytophaga	2.09e-05	3.54e-06	5.56e-06	6.81e-06	3.32e-05	8.99e-07	3.41e-06	1.91e-05	1.51e-05	5.36e-05	0.000128282	0.000115557	0.000124827	0.000131124	0.000129874	0.000137237	0.000173771	0.000144964	0.000171495	0.000157116	0.00014012	0.000134856	0.000146388	0.000151008	0.000168966	0.000129357	0.000128252	0.000151942	0.00020086	0.000172532
k__Bacteria;p__Actinobacteria;c__Actinobacteria;o__Pseudonocardiales;f__Pseudonocardiaceae;g__Sciscionella	3.6e-05	2.04e-05	1.11e-05	1.66e-05	8.89e-05	1.96e-05	7.89e-06	0.000179236	1.75e-05	0.000162909	0.000120331	0.000142172	0.000106594	0.000126575	0.000134138	0.000142785	0.000141858	0.000120527	0.000130992	0.000172807	0.000127589	0.000139814	0.000121072	0.000103498	0.000113294	0.000131234	0.000116563	0.00012327	0.000118655	0.000105055
k__Bacteria;p__unclassified;c__unclassified;o__unclassified;f__unclassified;g__Candidatus Vecturithrix	4.64e-06	1.77e-06	7.15e-06	4.54e-06	7.23e-06	8.17e-07	1.44e-06	9.76e-06	1.44e-06	2.28e-05	0.000142064	0.000127062	0.000115519	0.000168008	0.00018193	0.000144743	0.000211367	0.000107726	0.000193426	0.00016475	0.000138222	0.000133467	0.000133299	0.000152388	0.000146567	0.00014847	0.000110319	0.000165821	0.000148272	0.000202637
k__Bacteria;p__Proteobacteria;c__Gammaproteobacteria;o__Methylococcales;f__unclassified;g__Candidatus Methyloumidiphilus	7.54e-06	0	5.56e-06	2.27e-06	2.49e-05	4.9e-07	3.87e-06	2.43e-05	8.17e-06	6.06e-05	0.000131109	0.00012088	0.000111949	0.000159234	0.000151372	0.000139684	0.000192569	0.000126179	0.00018572	0.00016475	0.000151892	0.00012613	0.000141738	0.000144503	0.00014186	0.00014318	0.000101673	0.0001671	0.000161941	0.000187688
k__Bacteria;p__Actinobacteria;c__Actinobacteria;o__Streptosporangiales;f__unclassified;g__Allonocardiopsis	2.61e-05	8.86e-06	1.43e-05	1.36e-05	0.000175466	6.13e-06	4.4e-06	4.86e-05	7.45e-06	8.47e-05	0.00013535	0.000149727	0.000122022	0.00014331	0.000134493	0.000157634	0.000143607	0.000142304	0.000135734	0.000179592	0.000125311	0.000138624	0.000125894	0.000120255	0.000112969	0.000151201	0.000124249	0.000120896	0.000123971	0.000110038
k__Bacteria;p__Proteobacteria;c__Alphaproteobacteria;o__Rhizobiales;f__Brucellaceae;g__Brucella	4.93e-05	1.06e-05	7.15e-06	6.81e-06	9.83e-05	2.86e-06	5.69e-06	7.34e-05	0.00028367	7.28e-05	0.000140827	0.000137707	0.000117687	0.000135836	0.000126498	0.000125814	0.000121749	0.00012169	0.000123879	0.000120011	0.000130437	0.000114231	0.000115561	0.000134054	0.000121247	0.000117752	0.000109999	0.000129845	0.000110302	0.000118551
k__Bacteria;p__Proteobacteria;c__Deltaproteobacteria;o__Desulfobacterales;f__Desulfobacteraceae;g__Desulfococcus	4.64e-06	0	2.38e-06	1.51e-06	1.04e-05	6.54e-07	6.83e-07	7.59e-06	3.36e-06	3.91e-05	0.000144008	0.000128607	0.000113351	0.000149972	0.000161676	0.000136257	0.000233225	0.000119529	0.000189277	0.000156904	0.000146386	0.000129699	0.000127961	0.000143123	0.000157605	0.00013789	9.98e-05	0.000167647	0.000173142	0.000197861
k__Bacteria;p__Actinobacteria;c__Actinobacteria;o__Kineosporiales;f__Kineosporiaceae;g__Angustibacter	2.55e-05	8.86e-06	2.38e-06	1.06e-05	2.46e-05	2.7e-06	2.81e-06	1.36e-05	1.68e-06	3.21e-05	0.00015726	0.000165867	0.000188961	0.00014396	0.000141067	0.000179011	0.000139672	0.000114209	0.000116174	0.000150331	0.000169929	0.000166388	0.000156377	0.000138391	0.000131472	0.000171338	0.000174685	0.000124183	0.00011334	0.000114606
k__Bacteria;p__Deinococcus-Thermus;c__Deinococci;o__Deinococcales;f__Trueperaceae;g__Truepera	1.28e-05	0	3.97e-06	7.57e-07	4.29e-06	3.27e-07	7.58e-07	7.9e-06	1.44e-06	1.8e-05	0.000150369	0.000145434	0.000117432	0.00015111	0.000160077	0.000185539	0.000180984	0.000134325	0.000167543	0.000163477	0.000145247	0.000134261	0.000143977	0.000149825	0.000136666	0.000157515	0.000150027	0.000132767	0.000143146	0.000175854
k__Bacteria;p__Proteobacteria;c__Acidithiobacillia;o__Acidithiobacillales;f__Thermithiobacillaceae;g__Thermithiobacillus	6.96e-06	1.77e-06	3.97e-06	0	1.85e-05	1.47e-06	1.67e-06	1.81e-05	6e-06	3.53e-05	0.00013535	0.000126546	0.000115901	0.000154197	0.000160788	0.000129567	0.000211585	0.000145297	0.000189079	0.000169838	0.000148854	0.000123353	0.000122277	0.000142334	0.000156468	0.000131917	9.91e-05	0.000168743	0.00016308	0.000186027
k__Bacteria;p__Actinobacteria;c__Actinobacteria;o__Micrococcales;f__Microbacteriaceae;g__Herbiconiux	2.78e-05	1.06e-05	3.18e-06	3.03e-06	0.000235205	4e-06	2.28e-06	5.86e-05	5.52e-06	0.000128916	0.000136233	0.000139596	0.00015071	0.000164596	0.000108376	0.000171994	0.000119782	0.000214953	0.000110642	9.97e-05	0.000107084	0.000132674	0.000181005	0.000107835	9.97e-05	0.000102564	0.000148426	9.86e-05	8.85e-05	0.000109623
k__Bacteria;p__Proteobacteria;c__Gammaproteobacteria;o__Oceanospirillales;f__Halomonadaceae;g__Salinicola	2.2e-05	2.66e-06	7.15e-06	2.27e-06	3.4e-05	1.47e-06	9.94e-06	2.57e-05	3.27e-05	5.77e-05	0.000159734	0.000131698	0.000116794	0.000140873	0.000148174	0.000128914	0.000180547	0.000151947	0.000159838	0.000152452	0.000136703	0.000122758	0.000129511	0.000147657	0.000141211	0.000133282	0.000110639	0.000153038	0.000154727	0.000162774
k__Bacteria;p__Proteobacteria;c__Gammaproteobacteria;o__Legionellales;f__Coxiellaceae;g__Aquicella	4.93e-05	1.15e-05	2.07e-05	1.29e-05	3.86e-05	1.8e-06	3.34e-06	6.57e-05	5.28e-06	0.000119937	0.000166625	0.000140626	0.000123552	0.000123325	0.000167362	0.000143438	0.000148416	0.000155438	0.000126053	0.000110045	0.000127589	0.000130493	0.000111255	0.0001447	0.00014673	0.00013277	0.000117524	0.000140437	0.000140868	0.000126648
k__Bacteria;p__Nitrospirae;c__Nitrospira;o__Nitrospirales;f__Nitrospiraceae;g__Leptospirillum	5.22e-06	3.54e-06	5.56e-06	7.57e-07	8.04e-06	5.72e-07	1.67e-06	1.1e-05	2.64e-06	2.18e-05	0.000133406	0.000115386	0.000106466	0.000156472	0.00016292	0.000133157	0.000222077	0.000115705	0.000185523	0.000182772	0.000144297	0.000127716	0.000136399	0.000152585	0.000156631	0.000141644	0.000101673	0.000159612	0.000169345	0.000184574
k__Bacteria;p__Actinobacteria;c__Actinobacteria;o__Catenulisporales;f__Actinospicaceae;g__Actinospica	0.000109077	1.68e-05	1.03e-05	7.57e-06	9.32e-05	3.27e-06	2.88e-06	2.76e-05	3.12e-06	4.14e-05	0.000143655	0.000145434	0.000135792	0.000170608	0.000143199	0.000143927	0.000153224	0.000119695	0.00013356	0.000155844	0.000142778	0.000150919	0.000131405	0.000123014	0.000110534	0.000141815	0.000118645	0.000121444	0.000129477	0.000106924
k__Bacteria;p__Proteobacteria;c__Betaproteobacteria;o__Nitrosomonadales;f__Methylophilaceae;g__Novimethylophilus	1.1e-05	0	7.15e-06	3.78e-06	2.01e-05	5.72e-07	2.43e-06	1.74e-05	1.15e-05	5.48e-05	0.000130932	0.000109719	0.000103279	0.000135024	0.000146219	0.000136094	0.000188416	0.000165911	0.000195204	0.000142698	0.000149613	0.000129104	0.000121588	0.000151994	0.000156468	0.000119288	9.06e-05	0.000177326	0.000178458	0.000179798
k__Bacteria;p__Proteobacteria;c__Gammaproteobacteria;o__Nevskiales;f__Sinobacteraceae;g__Polycyclovorans	9.86e-06	7.97e-06	2.38e-06	4.54e-06	3.03e-05	1.88e-06	3.56e-06	1.98e-05	1.3e-05	5.9e-05	0.000112909	0.000103366	8.86e-05	0.000131124	0.000142666	9.87e-05	0.000245246	0.000129171	0.000246376	0.000106653	0.000128538	0.000118792	0.000126583	0.000129126	0.000142023	0.00013533	8.44e-05	0.000190293	0.000193646	0.000221322
k__Bacteria;p__Proteobacteria;c__Alphaproteobacteria;o__Rhodobacterales;f__Hyphomonadaceae;g__Maricaulis	1.62e-05	5.31e-06	8.74e-06	7.57e-06	3.96e-05	1.31e-06	4.25e-06	2.99e-05	1.68e-05	6.45e-05	0.000149309	0.000132041	0.000118324	0.000136649	0.000147641	0.000117981	0.000151913	0.000160924	0.000154701	0.000153088	0.000143158	0.000136442	0.000126411	0.000152191	0.000156793	0.000131234	0.000127931	0.000136967	0.00013783	0.00016132
k__Bacteria;p__Actinobacteria;c__Actinobacteria;o__Pseudonocardiales;f__Pseudonocardiaceae;g__Yuhushiella	3.31e-05	2.48e-05	8.74e-06	5.68e-05	4.42e-05	4.05e-05	1.5e-05	0.000521288	1.03e-05	0.000115126	0.000100541	0.00011178	8.9e-05	0.000106427	0.000110508	0.000133647	0.000106886	9.87e-05	0.0001	0.000173655	0.000110501	0.000124147	0.000119005	9.76e-05	7.39e-05	0.000114339	8.81e-05	9.48e-05	0.000111631	8.68e-05
k__Bacteria;p__Proteobacteria;c__Alphaproteobacteria;o__Parvularculales;f__Parvularculaceae;g__Amphiplicatus	1.91e-05	5.31e-06	7.95e-06	8.32e-06	2.04e-05	1.39e-06	3.64e-06	2.8e-05	1.06e-05	5.26e-05	0.000146128	0.000148353	0.000118452	0.000144448	0.000140534	0.000122877	0.000163716	0.000182369	0.000159838	0.000147575	0.000146196	0.000132079	0.000128305	0.000151994	0.000154034	0.000126968	0.000120726	0.000141532	0.000145804	0.000142012
k__Bacteria;p__Bacteroidetes;c__Cytophagia;o__Cytophagales;f__Cytophagaceae;g__Fibrella	1.22e-05	7.09e-06	7.15e-06	1.51e-06	2.79e-05	3.27e-07	2.28e-06	1.56e-05	9.13e-06	3.91e-05	0.000138707	0.000109376	0.000125974	0.000131612	0.000127742	0.000143111	0.000177705	0.000122355	0.000172088	0.000144818	0.000138791	0.000132872	0.000141566	0.000151205	0.000150138	0.000139425	0.000128252	0.000161073	0.000178647	0.000180629
k__Bacteria;p__Actinobacteria;c__Actinobacteria;o__Micrococcales;f__Microbacteriaceae;g__Glaciihabitans	1.57e-05	9.74e-06	5.56e-06	7.57e-07	5.55e-05	1.31e-06	6.07e-07	3.01e-05	1.2e-06	0.000111278	0.000106725	0.000122597	0.000158615	0.000166708	7.36e-05	0.000222092	0.000123498	0.00028012	6.97e-05	5.81e-05	8.64e-05	0.000151316	0.000234221	0.000192407	9.92e-05	6.84e-05	0.000323911	6.99e-05	5.01e-05	0.000119589
k__Eukaryota;p__Chytridiomycota;c__Chytridiomycetes;o__unclassified;f__unclassified;g__Blyttiomyces	0.000393953	0.0006652	0.000618443	0.000497907	0.000196897	4.19e-05	2.16e-05	7.51e-05	0.000134749	0.000213256	5.12e-06	5.15e-06	1.08e-05	4.22e-06	5.15e-06	7.18e-06	9.84e-06	5.49e-06	6.12e-06	5.51e-06	6.27e-06	5.55e-06	5.17e-06	6.9e-06	6.01e-06	5.97e-06	6.56e-06	9.68e-06	8.35e-06	2.33e-05
k__Bacteria;p__Proteobacteria;c__Betaproteobacteria;o__Nitrosomonadales;f__Gallionellaceae;g__Gallionella	4.64e-06	4.43e-06	3.18e-06	1.51e-06	9.11e-06	4.09e-07	1.44e-06	9.6e-06	6.49e-06	3.01e-05	0.000122804	0.000103538	0.000113479	0.000149485	0.000135382	0.000134626	0.000194317	0.000152778	0.000192833	0.000163265	0.000135753	0.000131881	0.00013881	0.000149628	0.000163286	0.00011707	8.37e-05	0.000180066	0.000171623	0.000201391
k__Bacteria;p__Proteobacteria;c__Gammaproteobacteria;o__unclassified;f__Candidatus Competibacteraceae;g__Plasticicumulans	1.8e-05	3.54e-06	1.59e-06	3.78e-06	3.19e-05	1.72e-06	4.47e-06	2.59e-05	8.89e-06	6.03e-05	0.00013376	0.000129809	0.000109271	0.000131774	0.000151727	0.000119613	0.00019082	0.000124018	0.000186708	0.000151603	0.000138791	0.000128113	0.000123311	0.000133463	0.000152898	0.000129869	0.00011176	0.000154499	0.000169725	0.0001744
k__Eukaryota;p__Ascomycota;c__Eurotiomycetes;o__Eurotiales;f__Aspergillaceae;g__Aspergillus	0.000258187	7.35e-05	8.74e-05	9.46e-05	0.000163143	0.000162526	8.4e-05	0.000104722	7.25e-05	9.01e-05	8.75e-05	9.46e-05	8.81e-05	7.98e-05	7.07e-05	9.33e-05	0.000100547	7.68e-05	9.76e-05	0.00010114	8.41e-05	8.86e-05	0.000129338	8.99e-05	8.62e-05	9.01e-05	8.5e-05	8.62e-05	7.82e-05	0.000101941
k__Bacteria;p__Cyanobacteria;c__unclassified;o__Oscillatoriales;f__Oscillatoriaceae;g__Moorea	6.96e-06	1.77e-05	1.27e-05	1.51e-05	6.97e-06	1.14e-06	1.74e-06	1.21e-05	8.41e-06	2.66e-05	0.00013482	0.000128435	0.000108761	0.000158584	0.000153859	0.000135278	0.000191913	0.000110552	0.000164185	0.000146727	0.000159296	0.000125138	0.000135194	0.000144305	0.000142997	0.000142668	0.000138179	0.000144454	0.000144285	0.000181044
k__Bacteria;p__Proteobacteria;c__Alphaproteobacteria;o__Rhodobacterales;f__Rhodobacteraceae;g__Tropicimonas	1.74e-05	4.43e-06	6.36e-06	6.05e-06	3.03e-05	1.88e-06	4.17e-06	3.16e-05	1.68e-05	3.72e-05	0.000146835	0.000155049	0.000126994	0.000140873	0.000147285	0.000140174	0.000145793	0.000148455	0.000153911	0.000139518	0.000145816	0.000140012	0.000136227	0.00014194	0.000141698	0.000143863	0.000135297	0.000130027	0.000135932	0.000146787
k__Bacteria;p__Proteobacteria;c__Alphaproteobacteria;o__Rhizobiales;f__Rhodobiaceae;g__Parvibaculum	1.91e-05	6.2e-06	5.56e-06	5.3e-06	2.89e-05	1.23e-06	4.4e-06	2.87e-05	1.3e-05	5.84e-05	0.000151076	0.000127233	0.000115391	0.000148022	0.000153681	0.000128914	0.000170274	0.000152279	0.000144427	0.000137609	0.000144677	0.000137235	0.000139844	0.0001516	0.000157929	0.000135671	0.000107597	0.00013094	0.0001384	0.000148863
k__Bacteria;p__Actinobacteria;c__Actinobacteria;o__Micrococcales;f__Demequinaceae;g__Lysinimicrobium	1.1e-05	1.77e-06	3.18e-06	3.78e-06	3.91e-05	2.7e-06	2.2e-06	2.22e-05	1.92e-06	5.2e-05	0.000164682	0.000159857	0.000144717	0.000146235	0.000162387	0.000144906	0.000151694	0.00012568	0.000118545	0.000146303	0.00013974	0.000152506	0.000141566	0.00013642	0.000140562	0.00013806	0.00013962	0.000117426	0.000131185	0.000140766
k__Bacteria;p__Proteobacteria;c__Alphaproteobacteria;o__Rhodospirillales;f__Acetobacteraceae;g__Rhodovarius	0.000100374	5.31e-06	7.95e-07	3.03e-06	0.00014573	1.72e-06	2.65e-06	4.55e-05	1.32e-05	4.3e-05	0.000130579	0.000117961	0.000101748	0.000129499	0.000116194	0.000106232	0.000124153	0.00013366	0.000121508	0.000110045	0.000147335	0.000146755	0.000147077	0.000151994	0.000143808	0.000136183	0.000120886	0.00016783	0.00012568	0.000139105
k__Bacteria;p__Proteobacteria;c__Gammaproteobacteria;o__Nevskiales;f__Algiphilaceae;g__Algiphilus	9.28e-06	0	5.56e-06	3.78e-06	1.29e-05	1.06e-06	2.12e-06	1.43e-05	8.41e-06	4.91e-05	0.000131109	0.000105083	9.03e-05	0.000149647	0.000157057	0.000116349	0.000208088	0.000150617	0.000195401	0.000109833	0.000135753	0.000116214	0.000134333	0.000137997	0.000149651	0.000141985	7.41e-05	0.00020198	0.000186052	0.000168379
k__Bacteria;p__Proteobacteria;c__Gammaproteobacteria;o__Enterobacterales;f__Enterobacteriaceae;g__Lelliottia	0	8.86e-07	2.38e-06	2.27e-06	2.68e-06	2.45e-06	0.000515223	4e-05	0.00217953	1.22e-05	4.06e-06	3.78e-06	4.59e-06	6.66e-06	6.57e-06	5.55e-06	6.56e-06	6.98e-06	6.32e-06	5.94e-06	6.46e-06	5.35e-06	4.48e-06	4.93e-06	9.25e-05	5.63e-06	5.92e-06	4.75e-06	8.16e-06	6.02e-06
k__Bacteria;p__Verrucomicrobia;c__Verrucomicrobiae;o__Verrucomicrobiales;f__Rubritaleaceae;g__Rubritalea	4.64e-06	3.54e-06	1.59e-06	7.57e-07	1.04e-05	8.17e-07	1.29e-06	1.44e-05	3.12e-06	3.14e-05	0.000136763	0.000102164	0.000167668	0.000147535	0.00013858	0.00016612	0.000169399	0.000107892	0.000145217	0.00014291	0.00015474	0.000139219	0.000136227	0.000150811	0.000152411	0.000126968	0.000113681	0.000168743	0.000155676	0.000158621
k__Bacteria;p__Actinobacteria;c__Actinobacteria;o__Pseudonocardiales;f__Pseudonocardiaceae;g__Streptoalloteichus	3.48e-05	2.66e-05	1.59e-05	2.27e-05	7.88e-05	2.97e-05	8.19e-06	0.000135395	2.43e-05	0.000155212	0.000125101	0.000135475	9.56e-05	0.000126412	0.000121524	0.000147354	0.000124809	0.000116537	0.000103332	0.000180652	0.000117716	0.000145565	0.000132955	0.000106849	0.000102419	0.000123043	0.000117524	9.75e-05	0.000108214	9.28e-05
k__Eukaryota;p__Mucoromycota;c__Mortierellomycetes;o__Mortierellales;f__Mortierellaceae;g__Mortierella	5.22e-05	0.000118691	0.000105724	9.38e-05	2.41e-05	5.31e-06	3.56e-06	1.84e-05	2.69e-05	4.1e-05	0.000135173	0.000167069	0.000114116	0.000120725	0.000144265	0.000127282	8.94e-05	8.3e-05	7.39e-05	5.36e-05	0.000113729	0.000156472	0.000114527	0.000134251	0.00015939	0.000180383	0.000150828	0.000133862	9.09e-05	0.000115229
k__Bacteria;p__Chloroflexi;c__Anaerolineae;o__Anaerolineales;f__Anaerolineaceae;g__Levilinea	3.48e-06	8.86e-07	7.95e-07	0	5.09e-06	2.45e-07	6.07e-07	3.25e-06	7.21e-07	1.38e-05	0.000145422	0.000122082	9.3e-05	0.000164271	0.000198986	0.000153392	0.000237159	9.39e-05	0.000185127	0.00013146	0.000107463	0.000115421	0.000114011	0.00013366	0.000133258	0.000138914	9.67e-05	0.00018244	0.000131565	0.000219869
k__Bacteria;p__Balneolaeota;c__Balneolia;o__Balneolales;f__Balneolaceae;g__Aliifodinibius	2.9e-06	1.77e-06	1.59e-06	1.51e-06	8.04e-06	4.09e-07	1.21e-06	8.21e-06	3.84e-06	1.83e-05	0.000131462	0.00011487	0.000102769	0.000133886	0.000145331	0.000141479	0.000197815	0.00013898	0.000172483	0.000181076	0.000146955	0.000138227	0.00010695	0.000141151	0.000136666	0.000140791	0.000105675	0.000145002	0.000169914	0.000162566
k__Bacteria;p__Actinobacteria;c__Actinobacteria;o__Pseudonocardiales;f__Pseudonocardiaceae;g__Crossiella	3.66e-05	2.3e-05	1.51e-05	3.41e-05	6.48e-05	1.4e-05	8.65e-06	0.000132452	3.6e-05	0.000150081	0.000120861	0.000138566	0.000102131	0.000138923	0.00012561	0.00015894	0.00010011	0.000104068	0.000101158	0.000153088	0.000109932	0.000129501	0.000137949	9.94e-05	0.000102581	0.000122531	0.000126971	0.000105921	0.000105746	9.86e-05
k__Eukaryota;p__Ascomycota;c__Sordariomycetes;o__Hypocreales;f__Nectriaceae;g__Neonectria	0.000184502	7.97e-06	3.18e-06	7.57e-06	7.55e-05	0.000943371	0.000906666	9.03e-05	0.000200082	1.38e-05	2.03e-05	2.75e-05	4.55e-05	1.56e-05	1.71e-05	2.4e-05	1.75e-05	1.3e-05	1.56e-05	2.42e-05	1.5e-05	2.28e-05	3.03e-05	1.79e-05	2.27e-05	2.75e-05	2.85e-05	2.87e-05	1.54e-05	3.36e-05
k__Bacteria;p__Proteobacteria;c__Gammaproteobacteria;o__Cellvibrionales;f__Cellvibrionaceae;g__Marinimicrobium	1.74e-05	3.54e-06	6.36e-06	7.57e-06	3.11e-05	2.12e-06	5.76e-06	3.41e-05	1.49e-05	8.4e-05	0.00011768	0.000124314	0.000103916	0.000132912	0.000142666	0.000114391	0.000140984	0.000157266	0.000150749	0.000151391	0.000130247	0.000112842	0.000144149	0.00013228	0.000141373	0.000133453	0.000112881	0.000146281	0.000157195	0.000139936
k__Bacteria;p__Proteobacteria;c__Gammaproteobacteria;o__Xanthomonadales;f__Rhodanobacteraceae;g__Oleiagrimonas	1.45e-05	1.15e-05	1.19e-05	2.27e-06	7.82e-05	1.14e-06	2.81e-06	2.15e-05	1.06e-05	9.81e-05	0.000125101	0.000105427	0.000138597	0.000113576	0.000113351	0.000112106	0.000143388	0.000105731	0.000140673	0.000144818	0.000118096	0.000111653	0.000124688	0.000126563	0.000149489	0.000118776	0.000187814	0.000153951	0.000160802	0.000146164
k__Bacteria;p__Cyanobacteria;c__unclassified;o__Synechococcales;f__Synechococcaceae;g__Cyanobium	2.32e-06	5.31e-06	1.19e-05	6.81e-06	1.58e-05	7.35e-07	1.37e-06	9.6e-06	4.08e-06	2.28e-05	0.000129872	0.000117274	0.000104426	0.000129012	0.000152082	0.000133483	0.000195629	0.000120527	0.000170705	0.000137185	0.000146006	0.000131683	0.000129166	0.000153571	0.000152573	0.000133111	9.86e-05	0.000143359	0.000145044	0.000172324
k__Bacteria;p__Chloroflexi;c__Anaerolineae;o__Anaerolineales;f__Anaerolineaceae;g__Bellilinea	1.74e-06	3.54e-06	3.97e-06	2.27e-06	6.16e-06	3.27e-07	2.28e-07	4.34e-06	2.64e-06	9.94e-06	0.000136587	0.000125688	9.98e-05	0.000167845	0.00018424	0.000143111	0.000232569	9.16e-05	0.000191055	0.000123403	0.000115817	0.000115024	0.0001023	0.000125577	0.000116702	0.000132258	9.17e-05	0.000182075	0.000134223	0.000212395
k__Bacteria;p__Verrucomicrobia;c__Opitutae;o__Opitutales;f__Opitutaceae;g__Cephaloticoccus	7.54e-06	8.86e-07	1.03e-05	0	1.55e-05	7.35e-07	1.52e-06	2.18e-05	6.49e-06	3.69e-05	0.000118917	0.000108861	0.000116794	0.000118938	0.000129874	0.000140174	0.000139672	0.000126013	0.000135931	0.000174927	0.000123412	0.000134261	0.000141049	0.000147657	0.000151761	0.000129357	0.000103274	0.000150664	0.00021282	0.000146164
k__Bacteria;p__Proteobacteria;c__Alphaproteobacteria;o__Rhizobiales;f__Phyllobacteriaceae;g__Paramesorhizobium	4.18e-05	1.42e-05	1.35e-05	1.06e-05	8.12e-05	3.35e-06	5.84e-06	9.64e-05	3.63e-05	5.74e-05	0.000115383	0.000148181	0.000110929	0.000119263	0.000131651	0.00014409	0.00011388	0.000183367	0.000126448	0.000145455	0.000121703	0.000108876	0.000101955	0.000108821	0.000114592	0.000127821	0.000110479	0.00012254	0.000121503	0.000105886
k__Bacteria;p__Firmicutes;c__Bacilli;o__Bacillales;f__Planococcaceae;g__Sporosarcina	3.48e-06	8.86e-07	6.36e-06	1.51e-06	9.11e-06	5.72e-07	1.33e-05	5.58e-06	1.8e-05	2.15e-05	0.000131816	0.000159685	0.00014255	0.000139898	0.000126676	0.000138052	0.000140328	0.000181205	0.000159245	0.000132309	0.00014069	0.00012613	0.0001054	0.000115326	0.000120598	0.000113145	0.00012537	0.000109026	0.000185292	0.000164435
k__Bacteria;p__Proteobacteria;c__Betaproteobacteria;o__Nitrosomonadales;f__Gallionellaceae;g__Ferriphaselus	2.32e-06	0	3.18e-06	3.03e-06	9.91e-06	7.35e-07	7.58e-07	1.04e-05	3.84e-06	2.53e-05	0.000121214	9.98e-05	9.55e-05	0.000141198	0.000134849	0.000128914	0.00017705	0.000141141	0.000155491	0.0001304	0.000155879	0.000122163	0.000126927	0.000162836	0.000152248	0.000126797	8.9e-05	0.000170569	0.000172572	0.000166303
k__Bacteria;p__Proteobacteria;c__Alphaproteobacteria;o__Rhodobacterales;f__Rhodobacteraceae;g__Ahrensia	1.8e-05	1.24e-05	3.97e-06	6.81e-06	4.29e-05	1.96e-06	2.96e-06	4.2e-05	2.62e-05	6.7e-05	0.000150192	0.000141485	0.000108251	0.000132424	0.00013858	0.000134462	0.000127651	0.000128672	0.00012625	0.000125311	0.000141069	0.00012494	0.000115561	0.000131294	0.000120435	0.00014318	0.000119125	0.000141898	0.000122642	0.000130593
k__Bacteria;p__Actinobacteria;c__Acidimicrobiia;o__Acidimicrobiales;f__Acidimicrobiaceae;g__Ferrimicrobium	1.74e-06	8.86e-07	2.38e-06	1.51e-06	7.77e-06	4.09e-07	1.29e-06	1.02e-05	9.61e-07	8.66e-06	0.000146835	0.000159514	0.000124444	0.000141848	0.000145153	0.000135278	0.000151476	0.000140143	0.000133165	0.000195706	0.000132526	0.000148341	0.000114527	0.000127352	0.000111995	0.000162976	0.0001124	0.000129662	0.000153587	0.000117928
k__Bacteria;p__Proteobacteria;c__Deltaproteobacteria;o__Desulfuromonadales;f__Geobacteraceae;g__Geoalkalibacter	2.32e-06	0	6.36e-06	0	5.63e-06	3.43e-06	1.74e-06	1.08e-05	3.6e-06	2.66e-05	0.000132346	0.000102851	9.64e-05	0.000159559	0.000140534	0.000123856	0.000197596	0.000115207	0.000182954	0.000154996	0.000141449	0.000116412	0.000114699	0.00014194	0.000133907	0.000134306	9.88e-05	0.000143724	0.000154157	0.000171701
k__Bacteria;p__Actinobacteria;c__Actinobacteria;o__Frankiales;f__unclassified;g__Antricoccus	1.51e-05	5.31e-06	2.38e-06	4.54e-06	3.08e-05	3.02e-06	2.12e-06	2.49e-05	4.08e-06	5.58e-05	0.00013747	0.000152474	0.000119727	0.000129012	0.000151549	0.000146701	0.000126121	0.000112713	0.000126053	0.000147999	0.000141449	0.000149135	0.000134161	0.000127154	0.000120273	0.000142497	0.000131294	0.000125279	0.000123022	0.00012561
k__Bacteria;p__Proteobacteria;c__Alphaproteobacteria;o__Rhodobacterales;f__Rhodobacteraceae;g__Thioclava	1.97e-05	4.43e-06	8.74e-06	9.08e-06	3e-05	2.45e-07	3.87e-06	2.66e-05	2.69e-05	4.78e-05	0.000134996	0.000139768	0.000122022	0.000133074	0.00013396	0.000121408	0.000128306	0.000140642	0.00015154	0.000134853	0.000131007	0.000129501	0.000132438	0.000130506	0.000127252	0.000129186	0.000121687	0.000125644	0.0001384	0.000132669
k__Bacteria;p__Firmicutes;c__Negativicutes;o__Acidaminococcales;f__Acidaminococcaceae;g__Phascolarctobacterium	0.00038525	0.000551824	0.000424484	0.000351864	0.000102333	4.74e-06	7.36e-06	4.01e-05	0.000126102	0.00018696	3.2e-05	2.42e-05	2.23e-05	3.36e-05	2.66e-05	2.86e-05	3.78e-05	2.44e-05	3.95e-05	3.8e-05	2.89e-05	2.84e-05	2.58e-05	3.15e-05	3.75e-05	3.55e-05	2.85e-05	2.96e-05	3.21e-05	4.44e-05
k__Bacteria;p__Proteobacteria;c__Gammaproteobacteria;o__Enterobacterales;f__Pectobacteriaceae;g__Pectobacterium	1.68e-05	4.43e-06	1.67e-05	5.3e-06	2.2e-05	0.000110557	0.000656222	2.09e-05	0.000940604	3.5e-05	5.05e-05	3.95e-05	4.16e-05	4.35e-05	4.87e-05	4.36e-05	5.2e-05	4.29e-05	6.18e-05	5.32e-05	5.05e-05	4.58e-05	4.18e-05	5.34e-05	4.84e-05	4.52e-05	3.73e-05	5.26e-05	5.68e-05	5.34e-05
k__Bacteria;p__Bacteroidetes;c__unclassified;o__Bacteroidetes Order II. Incertae sedis;f__Rhodothermaceae;g__Salinibacter	4.06e-06	8.86e-07	7.95e-07	0	6.97e-06	3.27e-07	1.21e-06	5.11e-06	2.88e-06	1.54e-05	0.000134996	0.000118133	0.000111184	0.000139411	0.000138757	0.00013022	0.000195192	0.000113544	0.000186313	0.000163477	0.000115248	0.000124741	0.000106605	0.000130111	0.000124655	0.000150859	0.000110799	0.000156142	0.000134223	0.000163812
k__Bacteria;p__Proteobacteria;c__Betaproteobacteria;o__Burkholderiales;f__Sutterellaceae;g__Sutterella	1.28e-05	1.77e-05	7.15e-06	2.27e-05	1.9e-05	1.72e-06	1.82e-06	1.66e-05	1.08e-05	3.37e-05	0.000125631	0.000116244	0.000104809	0.000136324	0.000124544	9.94e-05	0.000168962	0.000104567	0.00015233	0.000135277	0.000159676	0.000131881	0.000130027	0.00014746	0.000152411	0.000110755	8.12e-05	0.000145733	0.00013821	0.00016568
k__Bacteria;p__Actinobacteria;c__Actinobacteria;o__unclassified;f__unclassified;g__Thermobispora	2.03e-05	6.2e-06	3.18e-06	6.05e-06	0.000107691	1.63e-06	1.9e-06	2.12e-05	2.88e-06	2.57e-05	0.000131462	0.000131526	9.66e-05	0.000186206	0.000132894	0.000108843	0.000162405	0.000139312	0.000125262	0.000192314	0.000163474	0.000127518	0.000120899	0.000119466	8.86e-05	0.000112633	9.7e-05	9.88e-05	0.000132135	0.000104017
k__Bacteria;p__Proteobacteria;c__Alphaproteobacteria;o__Rhizobiales;f__Phyllobacteriaceae;g__Zhengella	1.8e-05	1.06e-05	1.51e-05	5.3e-06	4.71e-05	3.19e-06	5.54e-06	5.55e-05	2.43e-05	6.8e-05	0.00013641	0.000146121	0.000113479	0.000120563	0.000127387	0.000135768	0.000118907	0.000121524	0.000117952	0.000125948	0.000121324	0.000128708	0.000123483	0.00012814	0.000122545	0.000133282	0.00012633	0.000118887	0.000115048	0.000123949
k__Bacteria;p__Proteobacteria;c__Betaproteobacteria;o__Nitrosomonadales;f__Sterolibacteriaceae;g__Sulfuritalea	5.22e-06	4.43e-06	1.59e-06	3.78e-06	7.77e-06	7.35e-07	2.65e-06	1.25e-05	6e-06	2.28e-05	0.000103544	9.84e-05	9.38e-05	0.000126412	0.000133072	0.000106232	0.000172678	0.000148622	0.000183152	0.000147363	0.000142399	0.000114826	0.000111599	0.000148051	0.000134394	0.000113998	7.65e-05	0.000157968	0.00018852	0.000184159
k__Bacteria;p__Actinobacteria;c__Actinobacteria;o__Propionibacteriales;f__Propionibacteriaceae;g__Propionibacterium	1.86e-05	1.77e-06	2.38e-06	2.27e-06	3e-05	1.96e-06	2.73e-06	2.66e-05	7.93e-06	2.66e-05	0.000145775	0.000142687	0.000133625	0.000140548	0.000134671	0.000146375	0.000141203	0.000102738	0.000117162	0.000137397	0.000149993	0.000131881	0.000137433	0.000119663	0.000127577	0.000142327	0.000127611	0.000108843	0.000117326	0.000121873
k__Bacteria;p__Proteobacteria;c__Alphaproteobacteria;o__Rhizobiales;f__Rhodobiaceae;g__Candidatus Phaeomarinobacter	1.28e-05	8.86e-07	6.36e-06	3.78e-06	2.22e-05	8.17e-07	1.97e-06	2.22e-05	1.25e-05	4.68e-05	0.000140827	0.00013393	0.000103789	0.000141036	0.000140001	0.000108843	0.000139891	0.000129836	0.00013356	0.00011577	0.000142968	0.000133467	0.000128994	0.000157119	0.00014186	0.000126456	9.98e-05	0.000129662	0.000122452	0.000145957
k__Bacteria;p__Actinobacteria;c__Actinobacteria;o__Micrococcales;f__Microbacteriaceae;g__Microterricola	1.1e-05	1.77e-06	2.38e-06	1.51e-06	3.16e-05	1.8e-06	1.67e-06	1.86e-05	3.12e-06	7.95e-05	0.000141358	0.000169473	0.000158743	0.000136161	0.000116194	0.000145885	0.000104481	0.000253688	0.000107678	0.000103896	0.00011164	0.000136046	0.000119522	0.000120255	0.000105503	0.000134476	0.000141701	9.35e-05	9.83e-05	8.3e-05
k__Bacteria;p__Proteobacteria;c__Gammaproteobacteria;o__Xanthomonadales;f__Rhodanobacteraceae;g__Metallibacterium	6.96e-06	8.86e-06	1.03e-05	7.57e-07	6.88e-05	4.09e-07	1.74e-06	2.14e-05	7.69e-06	8.05e-05	0.000118387	0.000101649	0.000109016	0.000113089	0.000124366	0.000113575	0.000132022	0.000112214	0.000152133	0.000131248	0.000108223	9.46e-05	0.000122105	0.000126563	0.000139426	0.000118606	0.00016764	0.000152855	0.000142007	0.000145334
k__Bacteria;p__Actinobacteria;c__Actinobacteria;o__Micrococcales;f__Microbacteriaceae;g__Pseudoclavibacter	1.97e-05	7.97e-06	5.56e-06	5.3e-06	3.46e-05	2.29e-06	2.2e-06	2.49e-05	1.44e-05	7.31e-05	0.000141534	0.000128092	0.000147268	0.000153059	0.000114239	0.000139032	0.000120875	0.000119529	0.000112815	0.000113438	0.000101198	0.000123155	0.00013571	0.000120255	0.00010956	0.000121165	0.00018253	9.92e-05	0.000119415	0.000135783
k__Bacteria;p__Proteobacteria;c__Betaproteobacteria;o__Rhodocyclales;f__Azonexaceae;g__Azonexus	9.28e-06	8.86e-07	3.97e-06	4.54e-06	1.18e-05	6.54e-07	1.97e-06	1.69e-05	1.03e-05	4.52e-05	0.000104428	0.000101821	9.89e-05	0.000136649	0.000127742	0.000113575	0.000156722	0.000126511	0.000160036	0.000132521	0.000139551	0.000120577	0.000125722	0.000133069	0.000139263	0.000120995	7.67e-05	0.00016783	0.000170864	0.000164227
k__Bacteria;p__Firmicutes;c__Clostridia;o__Clostridiales;f__Clostridiales Family XVII. Incertae Sedis;g__Thermaerobacter	6.96e-06	1.77e-06	1.59e-06	1.51e-06	4.55e-06	1.63e-07	1.21e-06	7.13e-06	3.12e-06	1.51e-05	0.000124748	0.000119163	0.000103661	0.000138273	0.000147285	0.000122877	0.00018929	0.000114708	0.000169717	0.000181712	0.000141259	0.000123552	0.000111599	0.000126366	0.000123519	0.000128333	0.000100712	0.00013094	0.000142197	0.000138897
k__Bacteria;p__Proteobacteria;c__Alphaproteobacteria;o__Sneathiellales;f__Sneathiellaceae;g__Sneathiella	1.16e-05	4.43e-06	8.74e-06	1.14e-05	2.14e-05	1.63e-06	2.12e-06	2.14e-05	1.03e-05	4.55e-05	0.000126868	0.000121395	9.68e-05	0.000123	0.000132894	0.000118634	0.00013858	0.00020049	0.000123089	0.000135913	0.000116387	0.000116412	0.000107294	0.000126169	0.000124493	0.00013277	9.96e-05	0.000139706	0.00015017	0.000144296
k__Bacteria;p__Proteobacteria;c__Gammaproteobacteria;o__Enterobacterales;f__Morganellaceae;g__Xenorhabdus	1.62e-05	4.43e-06	1.03e-05	6.05e-06	2.38e-05	2.29e-06	5.92e-05	0.000102399	7.83e-05	9.94e-05	9.36e-05	0.000100104	9.66e-05	0.00012235	0.000117793	0.000108843	0.000140765	0.00010756	0.000138895	0.000121495	0.000111261	9.42e-05	0.000108327	0.000116903	0.000121571	0.000117752	9.86e-05	0.000125279	0.000123212	0.000145334
k__Bacteria;p__Balneolaeota;c__Balneolia;o__Balneolales;f__Balneolaceae;g__Rhodohalobacter	2.9e-06	3.54e-06	7.95e-07	0	3.75e-06	5.72e-07	4.55e-07	8.68e-06	2.64e-06	2.02e-05	0.000126692	0.000102679	0.000103406	0.000138598	0.000129519	0.000128262	0.000182514	0.00013233	0.000174458	0.00015542	0.000130057	0.000115024	0.000113322	0.000131491	0.000130174	0.000126626	9.73e-05	0.00014208	0.000159283	0.000149071
k__Bacteria;p__Chloroflexi;c__Dehalococcoidia;o__unclassified;f__unclassified;g__Dehalogenimonas	1.16e-06	8.86e-07	7.95e-07	3.78e-06	5.63e-06	3.27e-07	3.03e-07	2.63e-06	4.8e-07	9.94e-06	0.000146482	0.000125688	9.93e-05	0.000146235	0.0001599	0.000133973	0.000182951	0.00011637	0.000144427	0.000179168	0.000132146	0.000126923	0.000110394	0.000128337	0.000122058	0.000132258	8.89e-05	0.000128018	0.000136881	0.000143257
k__Bacteria;p__Cyanobacteria;c__unclassified;o__Synechococcales;f__Merismopediaceae;g__Synechocystis	0.000211192	0.000348101	0.000294913	0.000282248	6.46e-05	3.68e-06	5.39e-06	2.7e-05	7.78e-05	0.000121861	6.15e-05	5.86e-05	4.96e-05	7.15e-05	6.91e-05	5.81e-05	8.39e-05	4.8e-05	7.27e-05	6.81e-05	7.06e-05	6.05e-05	5.79e-05	6.17e-05	6.17e-05	5.82e-05	5.41e-05	6.14e-05	6.8e-05	7.43e-05
k__Bacteria;p__Bacteroidetes;c__Chitinophagia;o__Chitinophagales;f__Chitinophagaceae;g__Terrimonas	1.57e-05	7.09e-06	5.56e-06	3.78e-06	5.28e-05	3.27e-06	3.94e-06	2.93e-05	2.21e-05	0.000106147	0.000130932	7.09e-05	0.000114116	0.000109839	9.7e-05	0.000113575	0.000128525	6.12e-05	0.000133758	8.86e-05	0.000121324	0.000116214	0.000137088	0.000129717	0.000165071	0.000113827	0.000124729	0.000150846	0.000155106	0.000189141
k__Bacteria;p__Proteobacteria;c__Betaproteobacteria;o__Nitrosomonadales;f__Sterolibacteriaceae;g__Sterolibacterium	6.38e-06	8.86e-07	3.97e-06	7.57e-07	1.74e-05	4.9e-07	3.87e-06	2.01e-05	1.1e-05	5.13e-05	9.68e-05	0.000108346	0.000101876	0.00012235	0.00013929	0.000117328	0.000172897	0.000125514	0.000169124	0.000133793	0.000136133	0.000103125	0.000111599	0.000143714	0.000151437	0.000111097	7.7e-05	0.000148837	0.000155296	0.000144711
k__Bacteria;p__Verrucomicrobia;c__Spartobacteria;o__unclassified;f__unclassified;g__Candidatus Xiphinematobacter	5.8e-07	3.54e-06	4.77e-06	1.51e-06	4.55e-06	4.09e-07	3.03e-07	1.7e-06	0	3.34e-05	2.1e-05	1.84e-05	0.000261384	2.75e-05	2.97e-05	2.38e-05	0.000103607	0.00120177	2.61e-05	2.12e-05	5.34e-05	2.04e-05	2.05e-05	0.000329419	8.07e-05	0.000188745	1.46e-05	3.93e-05	1.52e-05	0.000138482
k__Bacteria;p__Actinobacteria;c__Actinobacteria;o__Corynebacteriales;f__Tsukamurellaceae;g__Tsukamurella	3.13e-05	6.2e-06	2.38e-06	6.05e-06	4.13e-05	4.9e-06	3.49e-06	5e-05	1.01e-05	8.02e-05	0.00013429	0.000133758	0.000119217	0.0001217	0.000112107	0.000127772	0.00012459	0.00012036	0.000111235	0.000127856	0.000122083	0.000135451	0.000128649	0.000108821	0.000125305	0.000130381	0.00012633	0.000114139	0.000115428	0.000110246
k__Bacteria;p__unclassified;c__unclassified;o__unclassified;f__unclassified;g__Candidatus Moduliflexus	5.22e-06	0	8.74e-06	0	1.07e-05	4.9e-07	6.07e-07	7.13e-06	7.21e-07	1.99e-05	0.000124218	0.000107831	9.27e-05	0.00014526	0.00013929	0.000138052	0.000200438	9.24e-05	0.00016458	0.000130188	0.00012664	0.000113239	0.000119177	0.000133463	0.000124818	0.000124749	9.51e-05	0.000147011	0.000134223	0.00017357
k__Bacteria;p__Proteobacteria;c__Betaproteobacteria;o__Burkholderiales;f__Comamonadaceae;g__Alicycliphilus	3.42e-05	6.2e-06	6.36e-06	7.57e-07	4.61e-05	3.27e-06	3.26e-06	3.32e-05	2.71e-05	5.1e-05	0.000107962	9.51e-05	0.000118324	0.000131287	0.000132184	0.000114881	0.000125246	8.88e-05	0.00014008	0.000120435	0.000113919	0.000111058	0.000124172	0.000130703	0.000136829	0.000116728	9.88e-05	0.000126009	0.000161751	0.000156337
k__Bacteria;p__Acidobacteria;c__Acidobacteriia;o__Acidobacteriales;f__Acidobacteriaceae;g__Bryocella	4.06e-06	6.2e-06	3.18e-06	1.51e-06	1.18e-05	1.06e-06	1.9e-06	1.19e-05	5.28e-06	3.14e-05	0.000126162	0.000106972	9.45e-05	0.000137949	0.000138757	0.000123692	0.000174427	0.000105398	0.000143637	0.000129552	0.000131386	0.000118197	0.000122794	0.00012952	0.000134881	0.000138914	9.27e-05	0.000130758	0.000145044	0.000154677
k__Bacteria;p__Bacteroidetes;c__Cytophagia;o__Cytophagales;f__Flammeovirgaceae;g__Flexithrix	5.22e-06	2.66e-06	5.56e-06	1.51e-06	1.69e-05	5.72e-07	2.12e-06	9.14e-06	3.6e-06	5.16e-05	0.00011715	0.000108346	0.000106976	0.000106427	0.000106067	0.00013022	0.000145137	0.000144466	0.000147391	0.000139942	0.000125311	0.000124741	0.000118144	0.000112172	0.000142185	0.000120312	0.000109518	0.000142446	0.000164789	0.000146995
k__Bacteria;p__Proteobacteria;c__Betaproteobacteria;o__Nitrosomonadales;f__Thiobacillaceae;g__Sulfuritortus	4.64e-06	7.97e-06	7.95e-07	7.57e-07	1.02e-05	7.35e-07	9.86e-07	7.44e-06	2.16e-06	2.6e-05	0.000108669	0.00010577	0.000103661	0.000133724	0.000120635	0.000125487	0.000179454	0.000136985	0.000146798	0.000134217	0.000142399	0.000102332	0.000110394	0.000140954	0.000134556	0.00011468	7.38e-05	0.000148655	0.00016251	0.000169002
k__Bacteria;p__Actinobacteria;c__Actinobacteria;o__Micrococcales;f__Microbacteriaceae;g__Frondihabitans	2.84e-05	3.54e-06	3.97e-06	4.54e-06	6.72e-05	3.35e-06	1.37e-06	3.01e-05	4.32e-06	0.000119937	0.000121214	0.000130496	0.000154025	0.000147535	9.31e-05	0.000200551	0.000119782	0.000173226	9.48e-05	9.5e-05	9.87e-05	0.000132872	0.000135194	0.000100344	9.59e-05	8.87e-05	0.000138819	8.04e-05	8.07e-05	0.000105471
k__Bacteria;p__Chlamydiae;c__Chlamydiia;o__Chlamydiales;f__Chlamydiaceae;g__Chlamydia	0.000181021	0.000304699	0.000211447	0.000196741	6.86e-05	3.35e-06	3.49e-06	2.53e-05	7.33e-05	0.000115126	6.82e-05	6.82e-05	5.67e-05	7.82e-05	7.64e-05	7.57e-05	8.22e-05	7.31e-05	7.84e-05	7.87e-05	7.42e-05	6.58e-05	6.8e-05	6.39e-05	8.07e-05	6.67e-05	5.35e-05	8.55e-05	8.52e-05	8.64e-05
k__Bacteria;p__Proteobacteria;c__Betaproteobacteria;o__Burkholderiales;f__Comamonadaceae;g__Melaminivora	1.62e-05	2.66e-06	6.36e-06	1.51e-06	4.8e-05	2.7e-06	3.56e-06	3.93e-05	2.64e-05	6.38e-05	0.000124041	9.96e-05	0.000115774	0.000115851	0.000130407	0.000114065	0.000136175	0.000101907	0.000136129	0.000121707	0.000116957	0.000107488	0.000130199	0.000115326	0.000136666	0.000102223	0.000105355	0.000123453	0.000156435	0.000144711
k__Bacteria;p__Proteobacteria;c__Gammaproteobacteria;o__Oceanospirillales;f__Kangiellaceae;g__Kangiella	1.33e-05	1.77e-06	9.54e-06	8.32e-06	2.92e-05	1.06e-06	4.55e-06	2.43e-05	1.06e-05	6.41e-05	0.00011556	0.000102164	0.000101748	0.000126737	0.000124722	0.000108843	0.00014776	0.000123519	0.000156084	0.000116618	0.000124361	0.000112049	0.000112805	0.000117297	0.000130499	0.000122019	9.38e-05	0.000144272	0.000148651	0.000144088
k__Bacteria;p__Actinobacteria;c__Actinobacteria;o__Pseudonocardiales;f__Pseudonocardiaceae;g__Haloechinothrix	1.91e-05	1.59e-05	4.77e-06	1.21e-05	1.96e-05	8.25e-06	4.63e-06	0.000118665	9.13e-06	5.42e-05	0.000125985	0.000134788	9.64e-05	0.00012235	0.000104645	0.000140011	0.000120875	0.000124849	0.000103924	0.000193374	0.000115248	0.000125931	9.92e-05	0.000106258	9.97e-05	0.000118435	0.000102313	0.000102634	0.000130426	0.000102356
k__Bacteria;p__Proteobacteria;c__Betaproteobacteria;o__Burkholderiales;f__Alcaligenaceae;g__Alcaligenes	7.6e-05	4.43e-06	5.56e-06	3.03e-06	2.89e-05	2.99e-05	9.06e-05	0.000321758	4.64e-05	6.89e-05	9.08e-05	8.76e-05	8.56e-05	9.05e-05	9.52e-05	8.55e-05	0.000114099	9.91e-05	0.000107481	0.000106228	0.000106894	8.77e-05	0.000100922	0.000100935	0.000113618	8.33e-05	8.21e-05	9.3e-05	9.82e-05	0.000123949
k__Bacteria;p__Proteobacteria;c__Alphaproteobacteria;o__Rhodospirillales;f__Rhodospirillaceae;g__Rhodovibrio	1.16e-05	1.77e-06	5.56e-06	1.51e-06	1.66e-05	1.14e-06	2.12e-06	1.46e-05	1.08e-05	3.14e-05	0.000121921	0.000121739	9.03e-05	0.000121375	0.000126498	0.000109822	0.000133771	0.000256846	0.000130597	0.000137397	0.000119425	0.00010253	9.85e-05	0.000120057	0.000114754	0.00011707	9.29e-05	0.000126009	0.000140868	0.000140143
k__Bacteria;p__Proteobacteria;c__Epsilonproteobacteria;o__Campylobacterales;f__Helicobacteraceae;g__Helicobacter	1.51e-05	8.86e-06	1.27e-05	1.14e-05	1.53e-05	8.17e-07	1.37e-06	1.38e-05	6.73e-06	4.01e-05	0.000114853	9.92e-05	0.000102131	0.000124137	0.000137691	0.000123366	0.000165028	0.000118532	0.000152923	0.000132521	0.000123032	0.000112248	0.000110222	0.000121832	0.000117027	0.00012509	9.21e-05	0.000133497	0.000140868	0.000143257
k__Bacteria;p__Proteobacteria;c__Gammaproteobacteria;o__Chromatiales;f__Halothiobacillaceae;g__Halothiobacillus	1.16e-05	0	7.15e-06	4.54e-06	3.4e-05	1.55e-06	3.79e-06	2.56e-05	9.85e-06	7.86e-05	0.000116973	0.000101478	8.63e-05	0.000119263	0.000125965	0.000103295	0.000158907	0.000123186	0.000145217	0.000120223	0.000128918	0.000107091	0.000104194	0.000128929	0.000126278	0.000114168	0.000101993	0.000144637	0.000141817	0.00013869
k__Bacteria;p__Proteobacteria;c__Betaproteobacteria;o__Nitrosomonadales;f__Gallionellaceae;g__Sideroxydans	1.1e-05	1.77e-06	7.95e-07	3.03e-06	1.79e-05	1.63e-07	1.29e-06	1.04e-05	2.88e-06	3.4e-05	0.000110966	9.05e-05	9.14e-05	0.000139086	0.000128808	0.000128914	0.000159126	0.000136153	0.000154108	0.000122131	0.000123792	0.000114231	0.000111944	0.000136814	0.000145107	0.000108025	7.64e-05	0.000151394	0.000156435	0.000145126
k__Bacteria;p__Actinobacteria;c__Actinobacteria;o__Glycomycetales;f__Glycomycetaceae;g__Stackebrandtia	2.38e-05	6.2e-06	7.95e-06	6.81e-06	4.77e-05	6.13e-06	3.72e-06	4.07e-05	4.8e-06	8.31e-05	0.00013641	0.00014303	0.000102641	0.000116663	0.00013627	0.000137237	0.000122842	0.000109056	0.000104912	0.000166658	0.000120944	0.000125535	0.0001054	9.74e-05	9.15e-05	0.000129016	0.000107917	0.000113591	0.000107454	9.74e-05
k__Bacteria;p__Bacteroidetes;c__Bacteroidia;o__Bacteroidales;f__Rikenellaceae;g__Alistipes	6.96e-06	7.97e-06	8.74e-06	5.3e-06	2.3e-05	1.06e-06	2.05e-06	1.08e-05	1.39e-05	6.54e-05	0.000112909	9.74e-05	0.000109781	0.0001217	0.000131118	0.00011537	0.000150383	9.48e-05	0.000139883	0.000142062	0.000114678	0.000115817	0.000114527	0.000141151	0.000125467	0.000102735	8.77e-05	0.000135506	0.00013821	0.000155299
k__Bacteria;p__Firmicutes;c__Bacilli;o__Bacillales;f__Listeriaceae;g__Listeria	0.000194946	0.000341015	0.000359301	0.000293598	9.32e-05	2.66e-05	1.35e-05	5e-05	8.14e-05	0.000113202	5.14e-05	4.53e-05	4.42e-05	5.7e-05	5.13e-05	5.42e-05	5.84e-05	4.39e-05	5.87e-05	4.79e-05	4.56e-05	4.48e-05	4.99e-05	5.11e-05	4.77e-05	4.54e-05	4.6e-05	4.77e-05	5.68e-05	7.7e-05
k__Bacteria;p__Bacteroidetes;c__Cytophagia;o__Cytophagales;f__Flammeovirgaceae;g__Reichenbachiella	1.8e-05	4.43e-06	3.18e-06	1.51e-06	2.12e-05	8.99e-07	3.26e-06	1.5e-05	3.84e-06	3.91e-05	0.000111496	0.000105255	0.000108124	9.57e-05	0.000120458	0.000113086	0.000140547	0.000133494	0.000154108	0.000133793	0.000118665	0.000103323	0.000123138	0.000118283	0.000135855	0.000109049	0.000102793	0.00013441	0.000163649	0.000153223
k__Bacteria;p__Firmicutes;c__Bacilli;o__Bacillales;f__Paenibacillaceae;g__Aneurinibacillus	2.9e-06	0	7.95e-07	3.03e-06	1.29e-05	4.9e-07	1.06e-06	8.99e-06	2.16e-06	1.67e-05	0.000126162	0.00011882	9.86e-05	0.00014786	0.000128097	0.000127935	0.000156285	0.000120527	0.000137512	0.000142062	0.000142209	0.000121172	0.000114355	0.000121635	0.000109398	0.000127309	9.7e-05	0.000121079	0.000124541	0.000156545
k__Bacteria;p__Proteobacteria;c__Betaproteobacteria;o__Burkholderiales;f__Alcaligenaceae;g__Advenella	2.49e-05	2.66e-06	3.18e-06	6.81e-06	3.03e-05	1.84e-05	3.72e-06	9.22e-05	2.86e-05	4.84e-05	0.000121214	0.000109033	0.000108634	0.000110814	0.000111219	0.000109496	0.000121093	0.000114209	0.000123484	0.000107077	0.000120374	0.000104513	0.000112461	0.000128534	0.000127577	0.000105977	0.000101352	0.000133132	0.000124161	0.000133707
k__Bacteria;p__Actinobacteria;c__Actinobacteria;o__Micrococcales;f__Microbacteriaceae;g__Frigoribacterium	1.74e-05	1.68e-05	3.18e-06	7.57e-07	6.11e-05	2.21e-06	5.31e-07	3.75e-05	3.6e-06	0.000109675	0.000132346	0.000122769	0.00015071	0.000135511	8.46e-05	0.000188313	0.000121749	0.000169735	9.66e-05	8.21e-05	0.000100249	0.000121767	0.000122622	0.0001102	9.45e-05	8.29e-05	0.000158033	8.02e-05	7.1e-05	9.82e-05
k__Bacteria;p__Proteobacteria;c__Gammaproteobacteria;o__Pseudomonadales;f__Moraxellaceae;g__Perlucidibaca	2.15e-05	9.74e-06	4.77e-06	2.27e-06	2.65e-05	3.27e-07	3.41e-06	3.84e-05	5.04e-06	4.52e-05	9.88e-05	0.000102164	8.26e-05	0.000115526	0.000129163	0.000101336	0.000166995	0.000105066	0.000173668	0.000115558	0.00011183	0.000113041	0.000104366	0.000109806	0.000122383	0.000115704	7.83e-05	0.000159429	0.000153208	0.000150317
k__Eukaryota;p__Chlorophyta;c__Chlorophyceae;o__Chlamydomonadales;f__Volvocaceae;g__Volvox	0.000280235	0.000574853	0.000475359	0.000419967	9.46e-05	2.89e-05	1.83e-05	7.16e-05	0.000134029	0.000140461	1.24e-05	1.29e-05	1.35e-05	1.61e-05	1.28e-05	1.24e-05	1.95e-05	1.18e-05	1.42e-05	1.23e-05	1.54e-05	1.31e-05	1.55e-05	1.7e-05	1.53e-05	1.28e-05	3.46e-05	1.83e-05	1.97e-05	1.91e-05
k__Bacteria;p__Proteobacteria;c__Alphaproteobacteria;o__Rhodospirillales;f__Rhodospirillaceae;g__Rhodospira	1.39e-05	3.54e-06	5.56e-06	7.57e-06	1.96e-05	8.99e-07	5.84e-06	1.49e-05	9.61e-06	3.59e-05	0.000119624	0.000119163	0.000103151	0.000120725	0.000125788	0.000103621	0.000139672	0.000186858	0.000130992	0.000132521	0.000109552	0.000100547	0.000102816	0.000127154	0.000120922	0.000116216	9.88e-05	0.000130392	0.00012473	0.000125402
k__Bacteria;p__Actinobacteria;c__Actinobacteria;o__Micrococcales;f__Cellulomonadaceae;g__Actinotalea	9.86e-06	0	2.38e-06	1.51e-06	1.47e-05	8.17e-07	1.82e-06	1.32e-05	2.16e-06	3.11e-05	0.000133583	0.00015814	0.000142167	0.000136974	0.000113706	0.000168241	0.000107323	9.64e-05	0.000101553	0.00011895	0.000128728	0.000127915	0.000128305	0.000117495	0.000114267	0.000122872	0.000155151	9.31e-05	0.000104607	9.9e-05
k__Bacteria;p__Proteobacteria;c__Gammaproteobacteria;o__Chromatiales;f__Ectothiorhodospiraceae;g__Oceanococcus	1.33e-05	1.77e-06	7.95e-07	4.54e-06	2.52e-05	9.81e-07	3.26e-06	1.77e-05	5.52e-06	5.61e-05	0.00011556	9.74e-05	8.25e-05	0.000118613	0.000129341	0.000106069	0.000180765	0.00012036	0.000164185	0.000102836	0.000120564	9.92e-05	9.49e-05	0.000104483	0.000115728	0.000116387	8.34e-05	0.000146463	0.000160042	0.000141181
k__Bacteria;p__Proteobacteria;c__Betaproteobacteria;o__Burkholderiales;f__Oxalobacteraceae;g__Solimicrobium	8.7e-06	2.66e-06	2.38e-06	1.51e-06	2.14e-05	3.63e-05	1.74e-06	1.52e-05	1.03e-05	5.1e-05	0.000124041	9.12e-05	0.000119727	0.00017272	0.000159367	0.000193698	0.000119563	8.89e-05	0.000104517	8.67e-05	0.000114109	0.000103918	0.000117283	0.000124394	0.00014251	9.16e-05	7.38e-05	0.000105921	0.00012473	0.000115021
k__Bacteria;p__Proteobacteria;c__Gammaproteobacteria;o__Thiotrichales;f__Thiotrichaceae;g__Leucothrix	1.91e-05	3.54e-06	7.95e-06	7.57e-07	3.08e-05	7.35e-07	3.56e-06	2.26e-05	1.27e-05	6.25e-05	0.000120861	0.000104912	8.86e-05	0.000119588	0.000124544	0.000112759	0.000162186	0.000111882	0.00012546	0.000123827	0.000110501	9.86e-05	9.9e-05	0.000117495	0.000125142	0.000119288	9.17e-05	0.000122174	0.000132704	0.000134745
k__Bacteria;p__Proteobacteria;c__Gammaproteobacteria;o__Salinisphaerales;f__Salinisphaeraceae;g__Abyssibacter	1.45e-05	1.77e-06	5.56e-06	3.03e-06	1.9e-05	5.72e-07	3.03e-06	1.55e-05	4.32e-06	4.52e-05	0.000104428	9.84e-05	8.15e-05	0.000116176	0.000118326	0.0001015	0.000155629	0.000158098	0.00017268	0.000110469	0.000107274	9.9e-05	9.52e-05	0.000120452	0.00012076	0.000118947	6.63e-05	0.000160343	0.000166307	0.000122288
k__Bacteria;p__Proteobacteria;c__Alphaproteobacteria;o__Rhodobacterales;f__Rhodobacteraceae;g__Pararhodobacter	1.45e-05	4.43e-06	1.59e-05	1.06e-05	2.84e-05	1.55e-06	3.72e-06	3.86e-05	1.87e-05	5.13e-05	0.000114323	0.000121052	0.000103534	0.000115363	0.000119747	0.000109659	0.000119345	0.000120859	0.000114593	0.000110893	0.000117716	0.000111256	0.000109361	0.000134646	0.000121085	0.000115192	9.98e-05	0.000121444	0.000117326	0.000116059
k__Bacteria;p__Proteobacteria;c__Gammaproteobacteria;o__Xanthomonadales;f__Rhodanobacteraceae;g__Aquimonas	9.28e-06	4.43e-06	2.38e-06	1.51e-06	6.08e-05	1.63e-07	4.55e-07	1.21e-05	4.08e-06	8.37e-05	9.91e-05	8.76e-05	0.000121512	8.71e-05	9.61e-05	0.000105416	0.000104481	8.43e-05	0.000131585	0.000107925	9.8e-05	9.84e-05	0.000138122	0.000110989	0.000128226	9.92e-05	0.000222719	0.00014555	0.000121123	0.000133915
k__Bacteria;p__Chloroflexi;c__Anaerolineae;o__Anaerolineales;f__Anaerolineaceae;g__Thermanaerothrix	4.64e-06	4.43e-06	1.59e-06	3.78e-06	6.7e-06	3.27e-07	4.55e-07	5.73e-06	1.68e-06	1.09e-05	0.000122098	0.000108517	8.33e-05	0.00015046	0.000167895	0.000121081	0.000189071	8.46e-05	0.000161616	0.000116406	0.000104615	9.76e-05	9.56e-05	0.000106455	0.000118325	0.000108366	8.31e-05	0.000148107	0.000112011	0.000176892
k__Bacteria;p__Proteobacteria;c__Deltaproteobacteria;o__Syntrophobacterales;f__Syntrophaceae;g__Desulfomonile	1.74e-06	0	2.38e-06	1.51e-06	2.68e-06	6.54e-07	1.37e-06	6.66e-06	1.2e-06	1.41e-05	0.0001198	9.46e-05	8.99e-05	0.000138923	0.000132539	0.000112922	0.000175957	8.99e-05	0.000159048	0.000141002	0.000123412	0.000116214	0.000102472	0.000131097	0.000122221	0.000110243	8.28e-05	0.000124731	0.000143525	0.000151562
k__Eukaryota;p__Ascomycota;c__Eurotiomycetes;o__Chaetothyriales;f__Cyphellophoraceae;g__Cyphellophora	0.000988655	0.000125777	7.31e-05	7.79e-05	9.56e-05	5.79e-05	0.000194394	0.000232372	0.000201283	2.98e-05	7.24e-06	1.63e-05	0.000110546	6.82e-06	1.37e-05	2.69e-05	6.99e-06	1.41e-05	2.35e-05	4.35e-05	6.65e-06	1.41e-05	1.21e-05	9.66e-06	1.64e-05	2.82e-05	1.41e-05	2.32e-05	7.21e-06	1.62e-05
k__Archaea;p__Euryarchaeota;c__Methanomicrobia;o__Methanosarcinales;f__Candidatus Methanoperedenaceae;g__Candidatus Methanoperedens	5.22e-06	3.54e-06	8.74e-06	6.05e-06	6.7e-06	2.45e-07	5.31e-07	5.58e-06	2.64e-06	1.12e-05	0.000107785	8.69e-05	8.38e-05	0.000128849	0.000130407	0.000117818	0.00019082	9.24e-05	0.000168136	0.000143546	0.000111451	0.000100348	0.000114872	0.000117889	0.000121409	0.000118094	8.01e-05	0.000123635	0.000132324	0.00017004
k__Bacteria;p__Proteobacteria;c__Deltaproteobacteria;o__Desulfarculales;f__Desulfarculaceae;g__Desulfarculus	2.32e-06	0	1.59e-06	2.27e-06	7.77e-06	4.9e-07	3.79e-07	9.29e-06	5.04e-06	1.64e-05	0.000128812	0.000102679	8.61e-05	0.000129824	0.000135382	0.000110801	0.000170929	9.51e-05	0.000144822	0.000146727	0.000130057	0.000109669	0.000116249	0.000117692	0.000119786	0.000111097	7.8e-05	0.000115783	0.000140298	0.000145957
k__Bacteria;p__Proteobacteria;c__Gammaproteobacteria;o__Alteromonadales;f__Idiomarinaceae;g__Aliidiomarina	1.39e-05	7.09e-06	2.38e-06	3.03e-06	2.79e-05	8.99e-07	3.56e-06	2.15e-05	1.03e-05	5.61e-05	0.000103014	9.86e-05	8.49e-05	0.000114388	0.000118859	0.00010509	0.000148416	0.000113877	0.000150157	0.000118738	0.00011297	0.000107686	0.000101266	0.000115129	0.000118812	0.000101369	9.37e-05	0.000141167	0.000133653	0.00014305
k__Bacteria;p__Proteobacteria;c__Alphaproteobacteria;o__Rhizobiales;f__Hyphomicrobiaceae;g__Cucumibacter	9.86e-06	2.66e-06	3.18e-06	4.54e-06	3.05e-05	2.53e-06	2.65e-06	4.03e-05	1.03e-05	8.5e-05	0.000116973	0.000123112	0.000101493	0.00011975	0.000113706	0.000128751	0.000109946	0.000163085	0.000100961	0.0001304	0.000109172	9.7e-05	9.58e-05	9.96e-05	0.000105827	0.000123213	0.000106956	0.0001114	0.000109922	0.000112115
k__Bacteria;p__Verrucomicrobia;c__Opitutae;o__Opitutales;f__Opitutaceae;g__Ereboglobus	1.1e-05	1.15e-05	1.59e-05	2.27e-06	1.77e-05	1.23e-06	2.35e-06	2.08e-05	4.8e-06	4.27e-05	8.98e-05	8.89e-05	9.95e-05	0.000112276	0.000113351	0.00013381	0.000122842	9.16e-05	0.000134944	0.000134005	9.66e-05	0.000108083	0.000119177	0.000125774	0.000124006	0.000112974	7.91e-05	0.000138793	0.00017599	0.000137652
k__Bacteria;p__Proteobacteria;c__Gammaproteobacteria;o__Cellvibrionales;f__Halieaceae;g__Parahaliea	2.38e-05	6.2e-06	1.27e-05	2.27e-06	2.28e-05	9.81e-07	1.14e-05	2.29e-05	1.1e-05	4.68e-05	0.000111142	8.95e-05	7.33e-05	0.000105777	0.000120102	7.75e-05	0.000148197	8.26e-05	0.000144625	8.78e-05	0.000116007	9.14e-05	0.000117972	0.000135434	0.000133745	9.57e-05	8.12e-05	0.000150116	0.000172762	0.000166096
k__Bacteria;p__Proteobacteria;c__Gammaproteobacteria;o__Alteromonadales;f__Alteromonadaceae;g__Paraglaciecola	1.16e-05	3.54e-06	9.54e-06	6.05e-06	2.46e-05	1.06e-06	3.19e-06	2.56e-05	7.93e-06	5.29e-05	0.00011503	0.000108346	9.35e-05	0.000110326	0.000116371	9.4e-05	0.000142733	0.000107227	0.000140673	0.00011471	0.00012607	0.000111256	0.000105572	0.000115326	0.000121571	0.000113657	8.71e-05	0.000134228	0.000130426	0.000126648
k__Eukaryota;p__Chlorophyta;c__Chlorophyceae;o__Sphaeropleales;f__Selenastraceae;g__Monoraphidium	0.000268051	0.000543852	0.000461845	0.000449478	9e-05	2.94e-05	1.37e-05	6.4e-05	0.000117215	0.000119295	1.31e-05	1.25e-05	1.24e-05	1.48e-05	1.85e-05	1.42e-05	1.57e-05	9.48e-06	9.29e-06	1.25e-05	1.75e-05	1.82e-05	1.48e-05	1.93e-05	1.54e-05	1.42e-05	1.87e-05	1.17e-05	1.46e-05	2.26e-05
k__Bacteria;p__Chloroflexi;c__Anaerolineae;o__Anaerolineales;f__Anaerolineaceae;g__Ornatilinea	1.74e-06	2.66e-06	3.97e-06	5.3e-06	9.64e-06	1.63e-07	6.83e-07	5.11e-06	9.61e-07	1.06e-05	0.000124925	9.7e-05	8.42e-05	0.000154034	0.00015457	0.000125161	0.000191039	7.51e-05	0.00016616	0.000112589	0.000104805	8.55e-05	8.99e-05	0.000108623	0.000114754	0.000122872	7.97e-05	0.00013788	0.00010062	0.000185197
k__Bacteria;p__Proteobacteria;c__Betaproteobacteria;o__Neisseriales;f__Neisseriaceae;g__Vitreoscilla	9.28e-06	3.54e-06	9.54e-06	3.03e-06	1.79e-05	4.9e-07	1.97e-06	1.43e-05	9.85e-06	4.78e-05	0.000103368	9.27e-05	9.19e-05	0.000108701	0.000111574	0.000107048	0.000117159	8.01e-05	0.000129609	0.000115134	0.000120184	0.000106893	0.000116766	0.000134646	0.000135693	0.000122189	0.000109838	0.00012254	0.00017542	0.000132046
k__Bacteria;p__Proteobacteria;c__Alphaproteobacteria;o__unclassified;f__unclassified;g__Thermopetrobacter	4.64e-06	1.77e-06	7.15e-06	5.3e-06	1.45e-05	4.09e-07	3.56e-06	1.46e-05	1.25e-05	3.62e-05	0.000113263	0.000128092	9.13e-05	0.000131774	0.000130407	0.000120755	0.000135738	0.000106562	0.000129214	0.000132096	0.000115058	0.000108678	0.000104022	0.000111383	0.000101769	0.000123725	0.000103114	0.00012254	0.000119225	0.00012125
k__Bacteria;p__Firmicutes;c__Bacilli;o__Bacillales;f__Bacillaceae;g__Oceanobacillus	7.54e-06	2.66e-06	6.36e-06	6.05e-06	1.18e-05	8.17e-07	6.07e-07	8.99e-06	5.52e-06	1.31e-05	0.000117327	0.000120708	8.93e-05	0.000107077	0.000118503	0.000114065	0.000132241	0.000161422	0.000142451	0.000162629	0.000107463	0.000113437	9.95e-05	9.46e-05	0.000109236	0.00011724	8.45e-05	0.000124001	0.000136501	0.000134122
k__Bacteria;p__Bacteroidetes;c__Chitinophagia;o__Chitinophagales;f__Chitinophagaceae;g__Hydrotalea	1.16e-05	8.86e-07	2.38e-06	6.81e-06	2.79e-05	5.72e-07	2.05e-06	1.63e-05	1.51e-05	4.01e-05	0.000121037	7.42e-05	0.000109654	0.000106914	9.65e-05	9.6e-05	0.000108197	5.8e-05	0.000114001	7.95e-05	0.000122463	0.000107686	0.000125894	0.000144305	0.000159228	0.000108196	0.000105195	0.000139158	0.000154727	0.000178345
k__Bacteria;p__Proteobacteria;c__Alphaproteobacteria;o__Rhodospirillales;f__Rhodospirillaceae;g__Aestuariispira	9.86e-06	1.77e-06	7.15e-06	3.03e-06	1.79e-05	1.31e-06	2.05e-06	1.83e-05	1.06e-05	3.3e-05	0.000108138	0.000107315	8.75e-05	0.00011975	0.000114239	0.000103458	0.00012459	0.000232575	0.000112815	0.000125735	0.000106704	9.66e-05	9.59e-05	0.000106652	0.000108749	0.000106148	9.46e-05	0.0001156	0.000126059	0.0001308
k__Eukaryota;p__Chlorophyta;c__unclassified;o__Pyramimonadales;f__unclassified;g__Pyramimonas	0.000342316	0.000607626	0.000552466	0.000478232	9.62e-05	8.91e-06	6.83e-06	2.77e-05	0.000122019	0.000167078	5.3e-07	5.15e-07	1.91e-06	1.62e-07	1.78e-07	1.14e-06	8.74e-07	4.99e-07	1.98e-07	2.12e-07	1.9e-07	2.18e-06	1.72e-06	7.89e-07	1.14e-06	1.71e-06	3.2e-07	5.48e-07	1.33e-06	1.66e-06
k__Bacteria;p__Proteobacteria;c__Betaproteobacteria;o__Rhodocyclales;f__Rhodocyclaceae;g__Rugosibacter	1.74e-06	8.86e-07	3.97e-06	0	1.21e-05	7.35e-07	2.88e-06	1.49e-05	6.25e-06	2.73e-05	9.36e-05	9.41e-05	9.12e-05	0.000119263	0.000127742	9.68e-05	0.00016	0.000116703	0.000147588	0.000116194	0.000113159	0.000108281	0.000112977	0.00012952	0.000117676	9.62e-05	7.22e-05	0.000142628	0.000146183	0.000153016
k__Bacteria;p__Calditrichaeota;c__Calditrichae;o__Calditrichales;f__Calditrichaceae;g__Caldithrix	2.9e-06	8.86e-07	7.95e-07	3.03e-06	5.89e-06	5.72e-07	3.79e-07	2.94e-06	9.61e-07	1.38e-05	0.000104605	9.79e-05	9.36e-05	0.000128687	0.000139468	0.000110311	0.000177268	8.16e-05	0.000154899	0.000137185	0.000109932	0.000104711	0.000102644	0.000116706	0.000124655	0.000117752	8.57e-05	0.000128566	0.000123971	0.000150732
k__Bacteria;p__Proteobacteria;c__Gammaproteobacteria;o__Acidiferrobacterales;f__Acidiferrobacteraceae;g__Acidiferrobacter	2.73e-05	2.39e-05	2.31e-05	1.36e-05	2.81e-05	2.45e-06	4.4e-06	2.35e-05	1.47e-05	8.02e-05	9.47e-05	9.13e-05	7.87e-05	0.000116663	0.000129696	9.56e-05	0.000142295	0.000128506	0.000126053	0.000136337	9.55e-05	8.43e-05	9.16e-05	0.000106258	0.000112969	0.000103758	8.02e-05	0.000118887	0.000119605	0.000118758
k__Bacteria;p__Proteobacteria;c__Alphaproteobacteria;o__Rhodobacterales;f__Hyphomonadaceae;g__Hirschia	2.03e-05	2.13e-05	2.31e-05	1.36e-05	2.95e-05	2.29e-06	4.4e-06	5.27e-05	1.35e-05	5.48e-05	0.00013429	0.000116244	9.97e-05	9.51e-05	0.000101092	6.51e-05	8.63e-05	0.000155105	8.42e-05	9.88e-05	0.000105375	0.00011661	0.000120211	0.000116509	0.000139588	9.68e-05	0.000114802	0.000100442	0.000111631	0.000118136
k__Bacteria;p__Chloroflexi;c__Thermomicrobia;o__Thermomicrobiales;f__Thermomicrobiaceae;g__Thermomicrobium	3.48e-06	8.86e-07	0	7.57e-07	1.23e-05	2.45e-07	7.58e-07	4.18e-06	1.2e-06	6.09e-06	0.000114146	0.000115386	9.41e-05	0.000142823	0.000132361	0.000127282	0.000140984	0.0001177	0.000130794	0.000128916	0.000114678	0.000112842	0.000103161	0.000112566	0.00010534	0.000126968	9.72e-05	0.000106652	0.000122642	0.00013433
k__Bacteria;p__Chlamydiae;c__Chlamydiia;o__Parachlamydiales;f__Parachlamydiaceae;g__Candidatus Protochlamydia	5.28e-05	3.54e-06	3.18e-06	3.03e-06	3.8e-05	4.09e-07	3.64e-06	1.3e-05	5.52e-06	4.52e-05	0.000109729	9.17e-05	0.000120109	9.36e-05	0.000108199	7.6e-05	9.33e-05	7.43e-05	0.00010511	0.00010538	0.00012645	0.000130096	0.000117627	0.000142531	0.000143808	8.99e-05	7.7e-05	0.000129297	0.000143336	0.000160075
k__Bacteria;p__Proteobacteria;c__Oligoflexia;o__Bacteriovoracales;f__Bacteriovoracaceae;g__Bacteriovorax	7.54e-06	7.97e-06	7.95e-07	0	9.38e-06	1.63e-07	9.86e-07	6.35e-06	1.35e-05	2.6e-05	0.000102308	8.53e-05	0.000102131	0.000103177	9.67e-05	0.000122877	0.000119782	9.48e-05	0.000100961	9.65e-05	0.00013993	0.000117205	0.000180488	0.000161062	0.000130499	0.000104612	9.61e-05	0.000114139	0.000143146	0.000121665
k__Bacteria;p__Firmicutes;c__Clostridia;o__Clostridiales;f__Peptococcaceae;g__Desulfallas	4.06e-06	0	3.97e-06	4.54e-06	6.16e-06	2.45e-07	1.14e-06	8.06e-06	3.6e-06	8.34e-06	0.000126162	0.000106457	8.1e-05	0.00012755	0.000127387	0.000109822	0.000157815	9.81e-05	0.000134944	0.000134853	0.000113919	0.000109273	0.000100922	0.00012124	0.000113456	0.000125602	8.89e-05	0.000116696	0.000130995	0.000137859
k__Bacteria;p__Proteobacteria;c__Alphaproteobacteria;o__Rhizobiales;f__Aurantimonadaceae;g__Mangrovicella	2.78e-05	1.77e-06	5.56e-06	4.54e-06	3.51e-05	2.12e-06	4.25e-06	4.83e-05	1.56e-05	4.84e-05	0.000123688	0.000121224	0.000103151	0.000107402	0.000110331	0.000115533	0.000102077	0.000108058	0.000102146	0.000109621	0.000116577	0.000114032	0.000107638	0.000117692	0.000102581	0.0001198	0.000104074	0.000118157	9.26e-05	0.000112737
k__Bacteria;p__Actinobacteria;c__Actinobacteria;o__Micrococcales;f__Intrasporangiaceae;g__Terracoccus	1.57e-05	3.54e-06	6.36e-06	3.03e-06	2.06e-05	1.55e-06	3.03e-07	1.18e-05	2.4e-06	3.75e-05	0.000128812	0.000138222	0.000135665	0.000117638	0.000134316	0.000135278	0.000102951	7.15e-05	8.71e-05	8.61e-05	0.000149613	0.0001414	0.000123827	0.000104483	0.000116215	0.000127309	0.000134336	8.51e-05	9.19e-05	8.78e-05
k__Bacteria;p__Proteobacteria;c__Gammaproteobacteria;o__Oceanospirillales;f__Oleiphilaceae;g__Oleiphilus	1.86e-05	5.31e-06	7.95e-06	7.57e-06	2.46e-05	1.23e-06	3.41e-06	1.7e-05	1.44e-05	5.48e-05	0.000104074	9.91e-05	8.54e-05	0.000117476	0.000116371	0.000101663	0.000141421	0.000104733	0.00013277	0.00010432	0.000113349	9.68e-05	0.000116422	0.000110003	0.000117514	9.97e-05	8.69e-05	0.000128201	0.000129097	0.000140351
k__Bacteria;p__Proteobacteria;c__Betaproteobacteria;o__Burkholderiales;f__Alcaligenaceae;g__Castellaniella	9.86e-06	8.86e-07	4.77e-06	4.54e-06	3.16e-05	1.55e-06	7.21e-06	1.84e-05	3.48e-05	4.04e-05	0.000113793	0.000103538	8.77e-05	0.000118938	0.000113884	9.76e-05	0.000134208	0.000108391	0.000140278	0.000114286	0.000114868	9.22e-05	9.89e-05	0.000114932	0.000130823	0.000100345	9.35e-05	0.000102269	0.000123402	0.000137029
k__Bacteria;p__Actinobacteria;c__Actinobacteria;o__Micrococcales;f__Microbacteriaceae;g__Subtercola	2.09e-05	4.43e-06	8.74e-06	9.08e-06	6e-05	3.11e-06	1.67e-06	3.13e-05	3.84e-06	9.78e-05	0.000104074	0.000115386	0.000141912	0.000132099	8.62e-05	0.000165304	9.97e-05	0.000171896	8.18e-05	7.12e-05	9.42e-05	0.00012256	0.000123655	9.5e-05	9.07e-05	8.09e-05	0.00012665	7.52e-05	8.01e-05	9.07e-05
k__Bacteria;p__Actinobacteria;c__Actinobacteria;o__Propionibacteriales;f__Nocardioidaceae;g__Micropruina	1.22e-05	1.77e-06	3.18e-06	1.51e-06	8.84e-06	9.81e-07	7.58e-07	9.76e-06	1.2e-06	1.25e-05	8.94e-05	0.000109204	0.000128014	0.000265986	0.000105534	0.000141479	7.1e-05	5.7e-05	6.34e-05	7.17e-05	0.000146006	0.000202878	0.000190477	0.000129323	0.00012076	0.000109902	0.000133535	5.66e-05	6.7e-05	7.35e-05
k__Bacteria;p__Planctomycetes;c__Candidatus Brocadiae;o__Candidatus Brocadiales;f__Candidatus Brocadiaceae;g__Candidatus Jettenia	1.74e-06	8.86e-07	7.95e-07	0	2.68e-06	8.17e-08	4.55e-07	4.34e-06	1.44e-06	1.28e-05	0.00011821	9.92e-05	9.26e-05	0.00012495	0.000122767	0.000102805	0.000162623	9.54e-05	0.00014581	0.000131036	0.000127399	0.000115421	0.000101266	0.000114735	0.000112969	0.00011707	8.63e-05	0.000124183	0.000117516	0.000140558
k__Bacteria;p__Proteobacteria;c__Gammaproteobacteria;o__Oceanospirillales;f__Halomonadaceae;g__Kushneria	1.33e-05	3.54e-06	1.59e-06	4.54e-06	2.33e-05	1.31e-06	2.35e-06	2.15e-05	1.03e-05	4.33e-05	0.00011715	0.000106972	8.71e-05	0.000109026	0.000121168	0.000102315	0.00012459	0.000108391	0.000135734	0.000108773	0.000123412	9.8e-05	0.0001054	0.000112172	0.000115566	0.000106148	9.33e-05	0.000118887	0.000119605	0.000137652
k__Bacteria;p__Spirochaetes;c__Spirochaetia;o__Leptospirales;f__Leptospiraceae;g__Turneriella	1.28e-05	8.86e-07	4.77e-06	3.03e-06	1.1e-05	2.45e-07	2.2e-06	6.51e-06	4.8e-06	3.78e-05	8.8e-05	7.9e-05	8.05e-05	8.58e-05	0.000121879	9.27e-05	0.000195847	0.000239889	9.54e-05	9.58e-05	7.8e-05	9.88e-05	0.000121933	0.000122226	0.000132122	9.1e-05	5.83e-05	0.000119252	0.000165548	0.000122288
k__Bacteria;p__Proteobacteria;c__Gammaproteobacteria;o__Cellvibrionales;f__Spongiibacteraceae;g__Spongiibacter	4.58e-05	6.2e-06	1.59e-06	6.81e-06	3.3e-05	1.4e-05	6.3e-06	2.59e-05	1.44e-05	5.13e-05	9.47e-05	9.55e-05	8.99e-05	0.000123487	0.000113173	7.93e-05	0.00014623	9.01e-05	0.000137314	8.95e-05	9.87e-05	9.32e-05	9.9e-05	0.000119072	0.000110859	9.25e-05	7.56e-05	0.000145915	0.000138779	0.00012997
k__Archaea;p__Euryarchaeota;c__Methanomicrobia;o__Methanomicrobiales;f__Methanomicrobiaceae;g__Methanoculleus	5.8e-06	1.77e-06	7.95e-07	7.57e-07	5.09e-06	0	9.86e-07	4.96e-06	4.32e-06	1.83e-05	0.000131109	0.00011487	8.39e-05	0.000138273	0.000118681	0.000110801	0.000144918	9.51e-05	0.000132375	0.00011471	0.000109932	9.84e-05	8.66e-05	0.000113552	0.000102906	9.9e-05	0.000173244	0.000109026	8.87e-05	0.000159244
k__Bacteria;p__Balneolaeota;c__Balneolia;o__Balneolales;f__Balneolaceae;g__Gracilimonas	5.8e-06	1.24e-05	5.56e-06	9.84e-06	5.09e-06	8.99e-07	4.55e-07	8.21e-06	2.88e-06	2.21e-05	0.000101424	8.91e-05	8.02e-05	0.000108377	0.00013396	0.000115696	0.00016	9.96e-05	0.000156084	0.000130612	0.000102717	0.000102728	0.000100405	0.000113355	0.000113618	9.97e-05	9.27e-05	0.000126009	0.000128148	0.000139105
k__Bacteria;p__Proteobacteria;c__Deltaproteobacteria;o__Syntrophobacterales;f__Syntrophobacteraceae;g__Desulfacinum	1.74e-06	4.43e-06	3.18e-06	9.08e-06	4.82e-06	4.9e-07	6.83e-07	6.35e-06	1.92e-06	1.48e-05	0.000105135	9.41e-05	7.36e-05	0.000132749	0.000137514	0.000102805	0.000165246	0.000100245	0.000144822	0.000132521	0.000114678	0.00010015	9.76e-05	0.000115523	0.000116215	0.000115534	8.12e-05	0.000118887	0.000127958	0.000140558
k__Bacteria;p__Proteobacteria;c__Gammaproteobacteria;o__Enterobacterales;f__Yersiniaceae;g__Yersinia	1.33e-05	3.54e-06	5.56e-06	2.27e-06	1.63e-05	8.17e-07	0.000380748	1.94e-05	0.000227224	4.14e-05	8.71e-05	8.79e-05	6.8e-05	7.9e-05	8.69e-05	7.69e-05	9.4e-05	8.56e-05	8.91e-05	7.42e-05	8.56e-05	7.56e-05	6.97e-05	8.46e-05	8.44e-05	7.3e-05	6.82e-05	9.31e-05	9e-05	0.000100695
k__Bacteria;p__Bacteroidetes;c__Cytophagia;o__Cytophagales;f__Flammeovirgaceae;g__Fabibacter	1.04e-05	2.66e-06	3.97e-06	2.27e-06	1.63e-05	4.9e-07	1.52e-06	1.02e-05	3.36e-06	3.24e-05	0.000105135	8.21e-05	8.84e-05	0.000109351	0.000100026	0.000113249	0.000152569	0.000118033	0.000135339	0.000113862	0.000121134	9.32e-05	0.000116938	0.000107243	0.000121734	9.57e-05	9.16e-05	0.000121261	0.000145424	0.000144296
k__Bacteria;p__Proteobacteria;c__Betaproteobacteria;o__Rhodocyclales;f__Zoogloeaceae;g__Zoogloea	9.28e-06	7.97e-06	7.95e-06	4.54e-06	2.3e-05	1.99e-05	2.5e-06	1.52e-05	1.37e-05	5.13e-05	9.74e-05	8.72e-05	7.64e-05	0.000105939	0.000106777	9.42e-05	0.000143388	0.000112713	0.000137117	0.00010644	0.000113919	0.000108876	0.000104022	0.000119663	0.000124818	9.78e-05	7.7e-05	0.000128566	0.000120174	0.000142219
k__Bacteria;p__Proteobacteria;c__Gammaproteobacteria;o__Legionellales;f__Coxiellaceae;g__Candidatus Berkiella	1.57e-05	7.09e-06	3.18e-06	6.05e-06	6.83e-05	3.11e-06	1.9e-06	2.43e-05	1.35e-05	8.37e-05	8.91e-05	8.53e-05	0.000155938	0.000103177	0.000103402	9.11e-05	0.00011388	0.000100079	0.00011163	9.14e-05	0.000108982	0.000108083	0.000100233	0.000127352	0.000116864	8.28e-05	0.000102473	0.000106834	0.00011239	0.000117513
k__Bacteria;p__Proteobacteria;c__Deltaproteobacteria;o__Desulfovibrionales;f__Desulfomicrobiaceae;g__Desulfomicrobium	1.74e-06	7.09e-06	0	1.51e-06	1.21e-05	5.72e-07	1.21e-06	8.37e-06	2.64e-06	1.41e-05	0.000112379	9.87e-05	8.61e-05	0.000135999	0.000109265	9.58e-05	0.000171367	0.000104733	0.000135931	0.000115346	0.000114109	0.00010372	0.000102644	0.000110792	0.000125792	0.000106489	8.25e-05	0.000119983	0.000132324	0.000134953
k__Bacteria;p__Bacteroidetes;c__Flavobacteriia;o__Flavobacteriales;f__Flavobacteriaceae;g__Lutibacter	1.04e-05	4.43e-06	5.56e-06	1.51e-06	1.58e-05	5.72e-07	1.9e-06	1.15e-05	4.8e-06	4.07e-05	0.000105311	8.04e-05	8.58e-05	9.7e-05	0.000102691	0.000110801	0.000135957	0.00010224	0.000135931	0.000118102	0.000104236	0.000109273	0.000116249	0.000110595	0.000126928	0.000104441	9.3e-05	0.000128566	0.000142766	0.000136821
k__Bacteria;p__Proteobacteria;c__Alphaproteobacteria;o__Rhodobacterales;f__Hyphomonadaceae;g__Oceanicaulis	1.16e-05	6.2e-06	7.95e-07	6.81e-06	2.41e-05	1.23e-06	2.5e-06	2.76e-05	1.2e-05	5e-05	0.000124571	0.000113325	9.73e-05	0.000109839	0.000116904	9.27e-05	0.000118033	0.000125181	0.000112025	0.000111105	0.000105945	9.68e-05	9.8e-05	0.000115523	0.000103717	0.000108878	9.72e-05	0.000108112	0.000119415	0.000123741
k__Bacteria;p__Nitrospirae;c__Nitrospira;o__Nitrospirales;f__Nitrospiraceae;g__Thermodesulfovibrio	4.93e-05	8.24e-05	6.44e-05	4.84e-05	2.01e-05	1.06e-06	9.86e-07	1.01e-05	1.18e-05	3.53e-05	9.98e-05	7.73e-05	7.6e-05	0.000104477	0.00011193	8.81e-05	0.000158689	8.08e-05	0.000123682	0.000113226	0.000105185	9.06e-05	8.39e-05	9.86e-05	0.000108911	9.49e-05	6.5e-05	0.000105921	0.000109163	0.000120212
k__Bacteria;p__Proteobacteria;c__Oligoflexia;o__Oligoflexales;f__Pseudobacteriovoracaceae;g__Pseudobacteriovorax	2.32e-06	8.86e-07	3.18e-06	5.3e-06	8.57e-06	2.45e-07	1.9e-06	1.07e-05	1.2e-06	2.47e-05	0.000113263	9.05e-05	0.000124699	0.000103989	9.77e-05	0.000118797	0.000102732	0.00012302	8.87e-05	9.67e-05	0.000132146	0.000148936	0.000138466	0.000147657	0.00013975	0.000108537	0.00011208	9.24e-05	9.72e-05	0.000102979
k__Bacteria;p__Proteobacteria;c__Deltaproteobacteria;o__Desulfobacterales;f__Desulfobulbaceae;g__Desulfurivibrio	4.06e-06	5.31e-06	7.95e-06	6.05e-06	1.1e-05	4.9e-07	7.58e-07	8.37e-06	4.08e-06	2.53e-05	0.000108315	9.44e-05	7.82e-05	0.000125275	0.00012863	0.000109332	0.000163061	9.78e-05	0.000136722	0.000119162	0.000105375	0.000103323	0.000107811	0.000103498	0.000108911	0.000105465	8.26e-05	0.000108478	0.000121503	0.000157583
k__Bacteria;p__Actinobacteria;c__Actinobacteria;o__Bifidobacteriales;f__Bifidobacteriaceae;g__Gardnerella	0.00029532	0.000407446	0.000484898	0.000452505	0.000147338	3.94e-05	1.87e-05	8.24e-05	0.000130906	0.000165474	5.3e-06	7.04e-06	7.78e-06	7.31e-06	6.04e-06	7.18e-06	4.15e-06	3.82e-06	5.53e-06	4.66e-06	4.37e-06	4.96e-06	8.61e-06	3.94e-06	5.68e-06	5.63e-06	5.12e-06	5.11e-06	4.94e-06	5.19e-06
k__Bacteria;p__Proteobacteria;c__Hydrogenophilalia;o__Hydrogenophilales;f__Hydrogenophilaceae;g__Tepidiphilus	6.38e-06	3.54e-06	3.18e-06	1.51e-06	1.53e-05	2.45e-07	1.37e-06	1.01e-05	6.73e-06	3.05e-05	0.000105488	7.98e-05	8.99e-05	0.000108864	0.000122234	0.000102642	0.000141203	0.000111217	0.000132375	0.000126372	0.000118286	9.12e-05	0.000102127	0.000116312	0.000129038	0.000104612	6.74e-05	0.000128384	0.00013802	0.000130385
[truncated: 3,736 more rows]

## Sheet: kegg_pathway_summary_L3
Taxon	HE1	HE2	HE3	HE4	HE5	DE1	DE2	DE3	DE4	DE5	HR1	HR2	HR3	HR4	HR5	DR1	DR2	DR3	DR4	DR5	HR1	HB2	HB3	HB4	HB5	DB1	DB2	DB3	DB4	DB5
[truncated: 456 more rows]

## Sheet: CAZyme_summary_L2
Taxon	HE1	HE2	HE3	HE4	HE5	DE1	DE2	DE3	DE4	DE5	HR1	HR2	HR3	HR4	HR5	DR1	DR2	DR3	DR4	DR5	HR1	HB2	HB3	HB4	HB5	DB1	DB2	DB3	DB4	DB5
[truncated: 336 more rows]
